# Supplementary material for: Highly efficient synthesis of flavonol 5-O-glycosides with glycosyl ortho-alkynylbenzoates as donors
Source: Royal Society of Chemistry journal article supplement (doi:10.1039/c5ob02313k), 2015-12-03

**Supporting Information for**  
**Highly Efficient Synthesis of Flavonol 5-*O*-glycosides with Glycosyl**  
**ortho-Akynylbenzoates as Donors**

Jin-Xi Liao, Nai-Li Fan, Hui Liu, Yuan-Hong Tu, and Jian-Song Sun\*

*The National Engineering Research Center for Carbohydrate Synthesis, Jiangxi*

*Normal University, Nanchang 330022, China*

*E-mail: [jssun@jxnu.edu.cn](mailto:jssun@jxnu.edu.cn)*

**Contents**

**S1-S3 List of the Contents**

**S5-S16 Experimental Section and Characterization Data for New Compounds**

|    |                                                                                                                                                                                      |
|----|--------------------------------------------------------------------------------------------------------------------------------------------------------------------------------------|
| S4 | 3,7,3',4'-Tetra- <i>O</i> -tert-butyldimethylsilyl-quercetin (3)                                                                                                                     |
| S4 | 3,7,4'-Tri- <i>O</i> -hexanoyl-kaempferol (5)                                                                                                                                        |
| S5 | 3,7,4'-Tri- <i>O</i> -tert-butyldimethylsilyl-5- <i>O</i> -(2'',3'',4'',6''-tetra- <i>O</i> -benzoyl-β- <i>D</i> -glucopyranosyl)-kaempferol (10)                                    |
| S5 | 3,7,4'-Tri- <i>O</i> -tert-butyldimethylsilyl-5- <i>O</i> -(2'',3'',4''-tri- <i>O</i> -benzoyl-6- <i>O</i> -tert-butyldiphenylsilyl-β- <i>D</i> -glucopyranosyl)-kaempferol (11)     |
| S6 | 3,7,4'-Tri- <i>O</i> -tert-butyldimethylsilyl-5- <i>O</i> -(2'',3'',4'',6''-tetra- <i>O</i> -benzoyl-β- <i>D</i> -galactopyranosyl)-kaempferol (12)                                  |
| S6 | 3,7,4'-Tri- <i>O</i> -tert-butyldimethylsilyl-5- <i>O</i> -(2'',3'',4''-tri- <i>O</i> -benzoyl-α- <i>L</i> -rhamnopyranosyl)-kaempferol (13)                                         |
| S7 | 3,7,3',4'-Tetra- <i>O</i> -tert-butyldimethylsilyl-5- <i>O</i> -(2'',3'',4'',6''-tetra- <i>O</i> -benzoyl-β- <i>D</i> -glucopyranosyl)-quercetin (14)                                |
| S7 | 3,7,3',4'-Tetra- <i>O</i> -tert-butyldimethylsilyl-5- <i>O</i> -(2'',3'',4''-tri- <i>O</i> -benzoyl-6- <i>O</i> -tert-butyldiphenylsilyl-β- <i>D</i> -glucopyranosyl)-quercetin (15) |
| S8 | 3,7,3',4'-Tetra- <i>O</i> -tert-butyldimethylsilyl-5- <i>O</i> -(2'',3'',4'',6''-tetra- <i>O</i> -benzoyl-β- <i>D</i> -galactopyranosyl)-quercetin (16)                              |
| S8 | 3,7,3',4'-Tetra- <i>O</i> -tert-butyldimethylsilyl-5- <i>O</i> -(2'',3'',4''-tri- <i>O</i> -benzoyl-α                                                                                |

|            |                                                                                                                                                           |
|------------|-----------------------------------------------------------------------------------------------------------------------------------------------------------|
|            | <b>-L-rhamnopyranosyl)-quercetin (17)</b>                                                                                                                 |
| <b>S9</b>  | <b>3,7,4'-Tri-O-benzyl-5-O-(2'',3'',4'',6''-tetra-O-benzoyl-β-D-glucopyranosyl)-kaempferol (18)</b>                                                       |
| <b>S9</b>  | <b>3,7,4'-Tri-O-benzyl-5-O-(2'',3'',4''-tri-O-benzoyl-6-O-tert-butylidiphenylsilyl-β-D-glucopyranosyl)-kaempferol (19)</b>                                |
| <b>S10</b> | <b>3,7,4'-Tri-O-benzyl-5-O-(2'',3'',4'',6''-tetra-O-benzoyl-β-D-galactopyranosyl)-kaempferol (20)</b>                                                     |
| <b>S10</b> | <b>3,7,4'-Tri-O-benzyl-2'',3'',4''-tri-O-benzoyl-α-L-rhamnopyranosyl)-kaempferol (21)</b>                                                                 |
| <b>S11</b> | <b>3,7,4'-Tri-O-hexanoyl-5-O-(2'',3'',4'',6''-tetra-O-benzoyl-β-D-glucopyranosyl)-kaempferol (22)</b>                                                     |
| <b>S11</b> | <b>3,7,4'-Tri-O-hexanoyl-5-O-(2'',3'',4''-tri-O-benzoyl-6-O-tert-butylidiphenylsilyl-β-D-glucopyranosyl)-kaempferol (23)</b>                              |
| <b>S12</b> | <b>3,7,4'-Tri-O-hexanoyl-5-O-(2'',3'',4'',6''-tetra-O-benzoyl-β-D-galactopyranosyl)-kaempferol (24)</b>                                                   |
| <b>S12</b> | <b>3,7,4'-Tri-O-hexanoyl-2'',3'',4''-tri-O-benzoyl-α-L-rhamnopyranosyl)-kaempferol (25)</b>                                                               |
| <b>S13</b> | <b>3,7,4'-Tri-O-hexanoyl-5-O-(2'',3'',4''-tri-O-benzoyl-β-D-glucopyranosyl)-kaempferol (26)</b>                                                           |
| <b>S14</b> | <b>3,7,4'-Tri-O-hexanoyl-5-O-[2'',3'',4''-tri-O-benzoyl-6''-O-(2''',3''',4''')-tri-O-benzoyl-α-L-rhamnopyranonyl]-β-D-glucopyranosyl]-kaempferol (27)</b> |
| <b>S14</b> | <b>3,7,4'-Tri-O-benzyl-5-O-(2'',3'',4''-tri-O-benzoyl-β-D-glucopyranosyl)-kaempferol (29)</b>                                                             |
| <b>S14</b> | <b>3,7,4'-Tri-O-benzyl-5-O-[2'',3'',4''-tri-O-benzoyl-6''-O-(2''',3''',4''')-tri-O-benzoyl-α-L-rhamnopyranonyl]-β-D-glucopyranosyl]-kaempferol (30)</b>   |
| <b>S15</b> | <b>3,7,4'-Tri-O-acetyl-5-O-[2'',3'',4''-tri-O-acetyl-6''-O-(2''',3''',4''')-tri-O-acetyl-α-L-rhamnopyranonyl]-β-D-glucopyranosyl]-kaempferol (28)</b>     |

|            |                                             |
|------------|---------------------------------------------|
| <b>S16</b> | <b>Key 2D correlations in compound (28)</b> |
|------------|---------------------------------------------|

**S17-S81  $^1\text{H}$ ,  $^{13}\text{C}$  NMR, and 2D spectra**

|               |                                                                     |
|---------------|---------------------------------------------------------------------|
| <b>S17-20</b> | 1D and 2 D spectra for compound <b>2</b>                            |
| <b>S21-22</b> | $^1\text{H}$ and $^{13}\text{C}$ NMR spectra for compound <b>3</b>  |
| <b>S23-27</b> | 1D and 2D spectra for compound <b>4</b>                             |
| <b>S28-32</b> | 1D and 2D spectra for compound <b>5</b>                             |
| <b>S33-36</b> | 1D and 2D spectra for compound <b>10</b>                            |
| <b>S37-38</b> | $^1\text{H}$ and $^{13}\text{C}$ NMR spectra for compound <b>11</b> |
| <b>S39-40</b> | $^1\text{H}$ and $^{13}\text{C}$ NMR spectra for compound <b>12</b> |
| <b>S41-42</b> | $^1\text{H}$ and $^{13}\text{C}$ NMR spectra for compound <b>13</b> |
| <b>S43-44</b> | $^1\text{H}$ and $^{13}\text{C}$ NMR spectra for compound <b>14</b> |
| <b>S45-46</b> | $^1\text{H}$ and $^{13}\text{C}$ NMR spectra for compound <b>15</b> |
| <b>S47-48</b> | $^1\text{H}$ and $^{13}\text{C}$ NMR spectra for compound <b>16</b> |
| <b>S49-50</b> | $^1\text{H}$ and $^{13}\text{C}$ NMR spectra for compound <b>17</b> |
| <b>S51-52</b> | $^1\text{H}$ and $^{13}\text{C}$ NMR spectra for compound <b>18</b> |
| <b>S53-54</b> | $^1\text{H}$ and $^{13}\text{C}$ NMR spectra for compound <b>19</b> |
| <b>S55-56</b> | $^1\text{H}$ and $^{13}\text{C}$ NMR spectra for compound <b>20</b> |
| <b>S57-58</b> | $^1\text{H}$ and $^{13}\text{C}$ NMR spectra for compound <b>21</b> |
| <b>S59-60</b> | $^1\text{H}$ and $^{13}\text{C}$ NMR spectra for compound <b>22</b> |
| <b>S61-62</b> | $^1\text{H}$ and $^{13}\text{C}$ NMR spectra for compound <b>23</b> |
| <b>S63-64</b> | $^1\text{H}$ and $^{13}\text{C}$ NMR spectra for compound <b>24</b> |
| <b>S65-66</b> | $^1\text{H}$ and $^{13}\text{C}$ NMR spectra for compound <b>25</b> |
| <b>S67-68</b> | $^1\text{H}$ and $^{13}\text{C}$ NMR spectra for compound <b>26</b> |
| <b>S69-70</b> | $^1\text{H}$ and $^{13}\text{C}$ NMR spectra for compound <b>27</b> |
| <b>S71-72</b> | $^1\text{H}$ and $^{13}\text{C}$ NMR spectra for compound <b>29</b> |
| <b>S73-74</b> | $^1\text{H}$ and $^{13}\text{C}$ NMR spectra for compound <b>30</b> |
| <b>S75-81</b> | 1D and 2D spectra for compound <b>28</b>                            |

### **3,7,3',4'-Tetra-*O*-*tert*-butyldimethylsilyl-quercetin (3)**

To a suspension of quercetin (1 g, 3.3 mmol) in dry CH<sub>2</sub>Cl<sub>2</sub> (10 mL) was added TBSCl (2.80g, 19 mmol) and DBU (3 mL, 20 mmol) at room temperature. Then the reaction mixture was stirred for another 5 h, at which time TLC showed that all starting material was consumed. Ethyl acetate (100 mL) was added to dilute the reaction mixture, and the mixture was washed successively with water, saturated NaCl solution and dried over Na<sub>2</sub>SO<sub>4</sub>. Filtration and concentration under reduced pressure to afford the crude product, which was further purified by silica gel chromatography (eluent system: PE : EA = 15 : 1) to afford the fully TBS protected quercetin.

The above obtained intermediate was dissolved in CH<sub>2</sub>Cl<sub>2</sub>/H<sub>2</sub>O (v/v = 10 : 1, 10 mL), to which catalytic amount I<sub>2</sub> was added. Then the reaction mixture was heated to reflux for 3 hours, at which time TLC showed that all starting material was consumed.

General procedure was adopted to get **3** (1.8 g, 70 %) as light-yellow solid: <sup>1</sup>H NMR (400 MHz, CDCl<sub>3</sub>) δ 12.68 (s, 1 H), 7.46 (m, 1 H), 7.35 (m, 1 H), 6.91 (d, *J* = 8.4 Hz, 1 H), 1.01 (s, 9 H), 1.00 (s, 9 H), 0.99 (s, 9 H), 0.84 (s, 9 H), 0.26 (s, 6 H), 0.23 (s, 6 H), 0.21 (s, 6 H), 0.12 (s, 6 H); <sup>13</sup>C NMR (100 MHz, CDCl<sub>3</sub>) δ 178.2, 161.8 (2 C), 156.4, 153.2, 149.2, 146.8, 135.6, 124.4, 123.2, 121.8, 120.8, 106.1, 102.9, 98.2, 25.9 (2 C), 25.7, 25.6, 18.6, 18.4, 18.3, -4.0, -4.1, -4.2, -4.4; HRMS (ESI) calcd for C<sub>39</sub>H<sub>67</sub>O<sub>7</sub>Si<sub>4</sub> [M+H]<sup>+</sup> 759.3958, found 759.3959.

### **3,7,4'-Tri-*O*-hexanoyl-kaempferol (5)**

To a suspension of kaempferol (2.3 g, 8 mmol) and Et<sub>3</sub>N (3.7 mL) in dry acetone (100 mL) was added hexanoyl chloride (3.66 mL, 26.4 mmol) dropwise at 0 °C. After hexanoyl chloride addition completed, the temperature was raised to rt, and the stirring was continued for another 3 h. Ice water (10 mL) was added to quench the reaction and the acetone was removed under reduced pressure, the resultant reaction mixture was diluted with ethyl acetate and washed with 1 N HCl, saturated Na<sub>2</sub>CO<sub>3</sub> and NaCl successively, then dried over Na<sub>2</sub>SO<sub>4</sub>. Filtration and concentration under reduced pressure afforded the crude product which was further purified by silica gel chromatography (eluent system: PE : EA = 13 : 1) to give **5** (3.1 g, 68%) as light-yellow solid: <sup>1</sup>H NMR (400 MHz, CDCl<sub>3</sub>) δ 12.17 (s, 1 H), 7.88 (dd, *J* = 2.0, 6.8

Hz, 2 H), 7.26 (dd,  $J = 2.0, 6.8$  Hz, 2 H), 6.84 (d,  $J = 2.0$  Hz, 1 H), 6.58 (d,  $J = 2.0$  Hz, 1 H), 2.63-2.56 (m, 6 H), 1.80-1.74 (m, 6 H), 1.41-1.33 (m, 12 H), 0.96-0.88 (m, 9 H);  $^{13}\text{C}$  NMR (100 MHz,  $\text{CDCl}_3$ )  $\delta$  176.3, 171.7, 171.1, 170.6, 161.7, 156.5, 156.4, 156.0, 153.2, 132.0, 129.7, 126.7, 122.0, 108.7, 105.4, 101.0, 34.3, 33.7, 31.2, 31.1, 31.0, 24.5, 24.4 (2 C), 22.3, 22.2 (2 C), 13.9, 13.8; HRMS (ESI) calcd for  $\text{C}_{33}\text{H}_{40}\text{O}_9\text{Na}$   $[\text{M}+\text{Na}]^+$  603.2565, found 603.2562.

**3,7,4'-Tri-*O*-*tert*-butyldimethylsilyl-5-*O*-(2'',3'',4'')-tetra-*O*-benzoyl- $\beta$ -D-glucopyranosyl)-kaempferol (10)**

To a suspension of acceptor **2** (63 mg, 0.1 mmol), donor **6** (115 mg, 0.15 mmol), and activated powdered 4Å MS in dry  $\text{CH}_2\text{Cl}_2$  (3 mL) was added  $\text{PPh}_3\text{AuNTf}_2$  (22 mg, 0.03 mmol) under the protection of  $\text{N}_2$ . The reaction mixture was then stirred at 30 °C overnight. Filtration and concentration under reduced pressure gave the crude product which was further purified by silica gel chromatography (eluent system: PE : EA = 15 : 1) to furnish **10** (103 mg, 90%), as a white solid:  $[\alpha]_{\text{D}}^{28}$  6.0 ( $c$  1.0,  $\text{CHCl}_3$ );  $^1\text{H}$  NMR (400 MHz,  $\text{CDCl}_3$ )  $\delta$  8.07 (d,  $J = 7.2$  Hz, 2 H), 7.93-7.87 (m, 6 H), 7.82 (d,  $J = 8.8$  Hz, 2 H), 7.52-7.28 (m, 12 H), 6.91 (d,  $J = 8.8$  Hz, 2 H), 6.62 (d,  $J = 2.4$  Hz, 1 H), 6.61 (d,  $J = 2.4$  Hz, 1 H), 6.04-5.95 (m, 2 H), 5.86 (t,  $J = 9.2$  Hz, 1 H), 5.71 (d,  $J = 6.8$  Hz, 1 H), 4.61 (dd,  $J = 3.1, 12.4$  Hz, 1 H), 4.50 (dd,  $J = 4.7, 12.0$  Hz, 1 H), 4.23 (m, 1 H), 1.00 (s, 9 H), 0.95 (s, 9 H), 0.75 (s, 9 H), 0.23 (s, 6 H), 0.22 (s, 3 H), 0.21 (s, 3 H), 0.01 (d,  $J = 4.0$  Hz, 3 H);  $^{13}\text{C}$  NMR (100 MHz,  $\text{CDCl}_3$ )  $\delta$  172.5, 166.0, 165.8, 165.2, 165.1, 159.3, 157.6, 157.1, 155.9, 149.5, 137.7, 133.4, 133.1, 133.0, 132.8, 130.1, 129.8 (2 C), 129.7, 129.6, 129.5, 128.9, 128.8, 128.4, 128.3, 128.1, 124.6, 119.8, 110.8, 109.6, 103.9, 99.9, 73.1, 72.4, 72.0, 69.6, 65.5, 63.0, 25.8, 25.6, 25.5, 18.7, 18.3, 18.2, 1.0, -3.9, -4.0, -4.4; HRMS (ESI) calcd for  $\text{C}_{67}\text{H}_{78}\text{O}_{15}\text{Si}_3\text{Na}$   $[\text{M}+\text{Na}]^+$  1229.4541, found 1229.4542.

**3,7,4'-Tri-*O*-*tert*-butyldimethylsilyl-5-*O*-(2'',3'',4'')-tri-*O*-benzoyl-6-*O*-*tert*-butyldiphenylsilyl- $\beta$ -D-glucopyranosyl)-kaempferol (11)**

Similar procedure as that used for the synthesis of **10** was adopted to give **11** (121 mg, 90%) as a white solid:  $[\alpha]_{\text{D}}^{28}$  -0.1 ( $c$  2.7,  $\text{CHCl}_3$ );  $^1\text{H}$  NMR (400 MHz,  $\text{CDCl}_3$ )  $\delta$  8.08 (d,  $J = 8.0$  Hz, 2 H), 7.91-7.88 (m, 4 H), 7.84 (d,  $J = 8.8$  Hz, 2 H), 7.62 (d,  $J =$

8.0 Hz, 2 H), 7.56-7.19 (m, 15 H), 7.14 (t,  $J = 7.6$  Hz, 2 H), 6.92 (d,  $J = 8.8$  Hz, 2 H), 6.67 (d,  $J = 2.4$  Hz, 1 H), 6.64 (d,  $J = 2.4$  Hz, 1 H), 6.01-5.86 (m, 3 H), 5.69 (d,  $J = 7.2$  Hz, 1 H), 3.93-3.89 (m, 1 H), 3.83 (d,  $J = 2.8$  Hz, 2 H), 1.01 (s, 9 H), 0.98 (s, 9 H), 0.94 (s, 9 H), 0.75 (s, 9 H), 0.23 (s, 6 H), 0.19 (s, 3 H), 0.18 (s, 3 H), 0.07 (s, 3 H), -0.04 (s, 3 H);  $^{13}\text{C}$  NMR (100 MHz,  $\text{CDCl}_3$ )  $\delta$  172.6, 166.0, 165.2, 164.9, 159.4, 157.6, 157.0, 156.4, 149.4, 137.7, 135.6, 135.4, 133.1, 133.0, 132.9, 132.7, 132.6, 130.2, 129.8 (2 C), 129.5, 129.4, 129.3, 129.1, 128.3, 128.2, 128.1, 127.6, 127.5, 124.6, 119.8, 110.8, 109.3, 103.5, 100.1, 75.2, 73.6, 72.0, 68.9, 62.2, 26.5, 25.8, 25.7, 25.5, 19.0, 18.7, 18.3, 18.2, -4.0 (2 C), -4.4 (3 C); HRMS (ESI) calcd for  $\text{C}_{76}\text{H}_{92}\text{O}_{14}\text{Si}_4\text{Na}$   $[\text{M}+\text{Na}]^+$  1363.5456, found 1363.5458.

**3,7,4'-Tri-*O*-*tert*-butyldimethylsilyl-5-*O*-(2'',3'',4'',6'')-tetra-*O*-benzoyl- $\beta$ -D-galactopyranosyl)-kaempferol (12)**

Similar procedure as that used for the synthesis of **10** was adopted to give **12** (120 mg, 99%) as a white solid:  $[\alpha]_{\text{D}}^{28}$  47.6 ( $c$  1.6,  $\text{CHCl}_3$ );  $^1\text{H}$  NMR (400 MHz,  $\text{CDCl}_3$ )  $\delta$  8.14 (d,  $J = 7.2$  Hz, 2 H), 8.06 (d,  $J = 7.2$  Hz, 2 H), 7.94 (d,  $J = 7.6$  Hz, 2 H), 7.84 (d,  $J = 7.2$  Hz, 2 H), 7.82 (d,  $J = 8.8$  Hz, 2 H), 7.65 (t,  $J = 7.2$  Hz, 1 H), 7.54-7.24 (m, 11 H), 6.91 (d,  $J = 8.8$  Hz, 2 H), 6.70 (d,  $J = 2.2$  Hz, 1 H), 6.63 (d,  $J = 2.2$  Hz, 1 H), 6.27 (dd,  $J = 8.0, 10.4$  Hz, 1 H), 6.08 (d,  $J = 3.2$  Hz, 1 H), 5.70 (dd,  $J = 3.8, 10.4$  Hz, 1 H), 5.65 (d,  $J = 8.0$  Hz, 1 H), 4.68-4.62 (m, 1 H), 4.44-4.38 (m, 2 H), 1.00 (s, 9 H), 0.98 (s, 9 H), 0.74 (s, 9 H), 0.26 (s, 6 H), 0.22 (s, 6 H), 0.07 (s, 3 H), -0.10 (s, 3 H);  $^{13}\text{C}$  NMR (100 MHz,  $\text{CDCl}_3$ )  $\delta$  172.5, 165.9, 165.6, 165.3, 159.4, 157.6, 157.1, 156.4, 149.4, 137.7, 133.5, 133.2 (2 C), 132.8, 130.2, 130.1, 129.8, 129.7, 129.3, 129.1, 128.8, 128.6, 128.4 (2 C), 128.2, 128.1, 124.6, 119.8, 110.7, 109.6, 103.8, 100.6, 71.9, 71.6, 69.4, 68.0, 61.7, 25.8, 25.7, 25.6, 18.7, 18.3, 18.2, -3.9, -4.1, -4.3 (2 C), -4.4; HRMS (ESI) calcd for  $\text{C}_{67}\text{H}_{78}\text{O}_{15}\text{Si}_3\text{Na}$   $[\text{M}+\text{H}]^+$  1207.4721, found 1207.4726.

**3,7,4'-Tri-*O*-*tert*-butyldimethylsilyl-5-*O*-(2'',3'',4'')-tri-*O*-benzoyl- $\alpha$ -L-rhamnopyranosyl)-kaempferol (13)**

Similar procedure as that used for the synthesis of **10** was adopted to give **13** (73 mg, 72%) as a white solid:  $[\alpha]_{\text{D}}^{28}$  17.9 ( $c$  1.5,  $\text{CHCl}_3$ );  $^1\text{H}$  NMR (400 MHz,  $\text{CDCl}_3$ )  $\delta$  8.17 (d,  $J = 7.2$  Hz, 2 H), 8.05 (d,  $J = 7.2$  Hz, 2 H), 7.93 (d,  $J = 8.8$  Hz, 2 H), 7.89 (d,

$J = 7.2$  Hz, 2 H), 7.63 (t,  $J = 7.2$  Hz, 1 H), 7.54-7.50 (m, 3 H), 7.44-7.36 (m, 3 H), 7.29-7.25 (m, 2 H), 6.95 (d,  $J = 8.8$  Hz, 2 H), 6.62 (d,  $J = 2.0$  Hz, 1 H), 6.54 (d,  $J = 2.0$  Hz, 1 H), 6.53 (dd,  $J = 3.4, 10.0$  Hz, 1 H), 6.13-6.12 (m, 1 H), 5.89 (s, 1 H), 5.81 (t,  $J = 10.0$  Hz, 1 H), 4.55-4.51 (m, 1 H), 1.33 (d,  $J = 6.4$  Hz, 3 H), 1.01 (s, 9 H), 1.007 (s, 9 H), 0.36 (s, 3 H), 0.31 (s, 3 H), 0.294 (s, 3 H), 0.291 (s, 3 H), 0.24 (s, 6 H);  $^{13}\text{C}$  NMR (100 MHz,  $\text{CDCl}_3$ )  $\delta$  172.7, 166.0, 165.5, 164.9, 159.7, 157.9, 157.1, 155.5, 149.1, 138.0, 133.4, 133.2, 132.8, 130.1, 130.0, 129.9, 129.7, 129.6, 129.5, 129.4, 128.6, 128.3, 128.2, 124.6, 119.8, 110.2, 105.3, 102.6, 96.1, 72.0, 70.7, 69.7, 68.2, 26.0, 25.7 (2 C), 25.6, 19.0, 18.3, 18.2, 17.6, -3.4 (2 C), -4.3, -4.4 (2 C). HRMS (MALDI) calcd for  $\text{C}_{60}\text{H}_{75}\text{O}_{13}\text{Si}_3$   $[\text{M}+\text{H}]^+$  1087.4783, found 1087.4510.

**3,7,3',4'-Tetra-*O*-*tert*-butyldimethylsilyl-5-*O*-(2'',3'',4'',6'')-tetra-*O*-benzoyl- $\beta$ -D-glucopyranosyl)-quercetin (14)**

Similar procedure as that used for the synthesis of **10** was adopted to give **14** (125 mg, 93%) as a white solide:  $[\alpha]_{\text{D}}^{28}$  7.3 ( $c$  1.7,  $\text{CHCl}_3$ );  $^1\text{H}$  NMR (400 MHz,  $\text{CDCl}_3$ )  $\delta$  8.08 (d,  $J = 7.2$  Hz, 2 H), 7.92 (d,  $J = 6.5$  Hz, 2 H), 7.88 (d,  $J = 7.2$  Hz, 2 H), 7.52-7.41 (m, 5 H), 7.37-7.26 (m, 9 H), 6.88 (d,  $J = 8.4$  Hz, 2 H), 6.62 (d,  $J = 2.2$  Hz, 1 H), 6.56 (d,  $J = 2.2$  Hz, 1 H), 6.04-5.93 (m, 2 H), 5.85 (t,  $J = 9.6$  Hz, 1 H), 5.71 (d,  $J = 7.2$  Hz, 1 H), 4.96 (dd,  $J = 3.2, 12.0$  Hz, 1 H), 4.49 (dd,  $J = 4.8, 12.0$  Hz, 1 H), 4.22-4.17 (m, 1 H), 1.00 (s, 9 H), 0.99 (s, 9 H), 0.94 (s, 9 H), 0.73 (s, 9 H), 0.223 (s, 3 H), 0.218 (s, 3 H), 0.21 (s, 3 H), 0.20 (s, 6 H), 0.198 (s, 3 H), -0.01 (s, 3 H), -0.02 (s, 3 H);  $^{13}\text{C}$  NMR (100 MHz,  $\text{CDCl}_3$ )  $\delta$  172.6, 166.0, 165.8, 165.2, 165.1, 159.3, 157.5, 155.9, 159.6, 148.6, 146.6, 137.6, 133.3, 133.1, 133.0, 132.8, 130.1, 129.8 (2 C), 129.7, 129.6, 129.5, 128.9, 128.8, 128.3, 128.2, 128.1, 124.7, 123.0, 121.4, 120.7, 110.9, 109.9, 103.8, 100.0, 73.1, 72.4, 72.0, 69.6, 62.9, 25.9, 25.7, 25.5, 15.6, 18.5, 18.4, 18.2, -4.0, -4.1 (2 C), -4.2 (3 C), -4.4 (2 C); HRMS (ESI) calcd for  $\text{C}_{73}\text{H}_{92}\text{O}_{16}\text{Si}_4\text{Na}$   $[\text{M}+\text{Na}]^+$  1359.5355, found 1359.5361.

**3,7,3',4'-Tetra-*O*-*tert*-butyldimethylsilyl-5-*O*-(2'',3'',4'')-tri-*O*-benzoyl-6-*O*-*tert*-butyldiphenylsilyl- $\beta$ -D-glucopyranosyl)-quercetin (15)**

Similar procedure as that used for the synthesis of **10** was adopted to give **15** (121 mg, 90%) as a white solide:  $[\alpha]_{\text{D}}^{28}$  -0.1 ( $c$  2.7,  $\text{CHCl}_3$ );  $^1\text{H}$  NMR (400 MHz,  $\text{CDCl}_3$ )  $\delta$

8.08 (d,  $J = 7.6$  Hz, 2 H), 7.90 (d,  $J = 8.0$  Hz, 4 H), 7.61 (d,  $J = 6.8$  Hz, 2 H), 7.55-7.24 (m, 15 H), 7.20 (t,  $J = 7.2$  Hz, 2 H), 7.15 (t,  $J = 7.6$  Hz, 2 H), 6.89 (d,  $J = 8.4$  Hz, 1 H), 6.67 (d,  $J = 2.1$  Hz, 1 H), 6.60 (d,  $J = 2.1$  Hz, 1 H), 5.99-5.92 (m, 2 H), 5.88 (t,  $J = 9.2$  Hz, 1 H), 5.69 (d,  $J = 7.2$  Hz, 1 H), 3.91 (m, 1 H), 3.82 (d,  $J = 2.5$  Hz, 1 H), 1.00 (s, 9 H), 0.99 (s, 9 H), 0.97 (s, 9 H), 0.94 (s, 9 H), 0.74 (s, 9 H), 0.22 (s, 6 H), 0.20 (s, 6 H), 0.19 (s, 3 H), 0.188 (s, 3 H), 0.04 (s, 3 H), -0.05 (s, 3 H);  $^{13}\text{C}$  NMR (100 MHz,  $\text{CDCl}_3$ )  $\delta$  172.6, 166.0, 165.2, 164.9, 159.4, 157.6, 156.4, 149.5, 148.6, 146.6, 137.7, 135.6, 135.4, 133.1, 133.0 (2 C), 132.7, 132.6, 130.2, 129.8 (3 C), 129.5, 129.4 (2 C), 129.1, 128.3, 128.2, 128.0, 127.6, 127.5, 124.8, 123.0, 121.4, 120.7, 110.9, 109.5, 103.5, 100.2, 75.2, 73.6, 72.1, 69.0, 62.2, 26.5, 25.9, 25.8, 25.5, 19.0, 18.7, 18.6, 18.4, 18.2, -4.1 (3 C), -4.2, -4.3, -4.4; HRMS (ESI) calcd for  $\text{C}_{76}\text{H}_{92}\text{O}_{14}\text{Si}_4\text{Na}$   $[\text{M}+\text{Na}]^+$  1363.5456, found 1363.5458.

**3,7,3',4'-Tetra-*O*-*tert*-butyldimethylsilyl-5-*O*-(2'',3'',4'',6'')-tetra-*O*-benzoyl- $\beta$ -D-galactopyranosyl)-quercetin (16)**

Similar procedure as that used for the synthesis of **10** was adopted to give **16** (87 mg, 70%) as a white solid:  $[\alpha]_{\text{D}}^{28}$  41.7 ( $c$  1.5,  $\text{CHCl}_3$ );  $^1\text{H}$  NMR (400 MHz,  $\text{CDCl}_3$ )  $\delta$  8.13 (d,  $J = 7.2$  Hz, 2 H), 8.06 (d,  $J = 7.2$  Hz, 2 H), 7.94 (d,  $J = 7.2$  Hz, 2 H), 7.84 (d,  $J = 7.2$  Hz, 2 H), 7.64 (t,  $J = 7.2$  Hz, 1 H), 7.54-7.24 (m, 13 H), 6.88 (d,  $J = 8.4$  Hz, 1 H), 6.70 (d,  $J = 2.2$  Hz, 1 H), 6.58 (d,  $J = 2.2$  Hz, 1 H), 6.25 (dd,  $J = 8.0, 10.4$  Hz, 1 H), 6.07 (d,  $J = 3.3$  Hz, 1 H), 5.70 (dd,  $J = 3.4, 10.4$  Hz, 1 H), 5.65 (d,  $J = 8.0$  Hz, 1 H), 4.66-4.61 (m, 1 H), 4.44-4.37 (m, 1 H), 1.00 (s, 9 H), 0.998 (s, 9 H), 0.990 (s, 9 H), 0.98 (s, 9 H), 0.72 (s, 9 H), 0.26 (d,  $J = 1.8$  Hz, 6 H), 0.22 (s, 6 H), 0.20 (s, 6 H), 0.03 (s, 3 H), -0.12 (s, 3 H);  $^{13}\text{C}$  NMR (100 MHz,  $\text{CDCl}_3$ )  $\delta$  172.6, 165.9, 165.6, 165.3, 159.4, 157.6, 156.3, 149.6, 148.6, 146.6, 137.7, 133.5, 133.2 (2 C), 132.8, 130.1, 130.0, 129.8 (2 C), 129.7, 129.3, 129.2, 129.1, 128.8, 128.6, 128.5, 128.4 (2 C), 128.3 (2 C), 128.1, 126.3, 124.7, 123.0, 121.4, 120.7, 110.8, 109.3, 103.7, 100.6, 71.9, 71.6, 69.5, 68.0, 61.7, 25.9, 25.7, 25.6, 18.7, 18.6, 18.4, 18.3, -4.1, -4.2 (2 C), -4.3 (2 C); HRMS (ESI) calcd for  $\text{C}_{73}\text{H}_{93}\text{O}_{16}\text{Si}_4$   $[\text{M}+\text{H}]^+$  1338.5560, found 1338.5561.

**3,7,3',4'-Tetra-*O*-*tert*-butyldimethylsilyl-5-*O*-(2'',3'',4'')-tri-*O*-benzoyl- $\alpha$ -L-rhamnopyranosyl)-quercetin (17)**



Similar procedure as that used for the synthesis of **10** was adopted to give **17** (120 mg, 99%) as a white solide:  $[\alpha]_D^{28}$  7.7 (*c* 1.9, CHCl<sub>3</sub>); <sup>1</sup>H NMR (400 MHz, CDCl<sub>3</sub>) δ 8.17 (d, *J* = 7.2 Hz, 2 H), 8.04 (d, *J* = 7.2 Hz, 2 H), 7.88 (d, *J* = 7.2 Hz, 2 H), 7.64 (t, *J* = 7.2 Hz, 1 H), 7.56-7.49 (m, 4 H), 7.43-7.36 (m, 4 H), 7.28 (t, *J* = 8.0 Hz, 2 H), 6.92 (d, *J* = 8.4 Hz, 1 H), 6.58 (d, *J* = 2.0 Hz, 1 H), 6.54 (d, *J* = 2.0 Hz, 1 H), 6.52 (dd, *J* = 3.4, 10.0 Hz, 1 H), 6.12 (m, 1 H), 5.88 (bs, 1 H), 5.80 (t, *J* = 6.0 Hz, 1 H), 4.56-4.52 (m, 1 H), 1.02 (s, 9 H), 1.01 (s, 18 H), 0.83 (s, 9 H), 0.33 (s, 3 H), 0.29 (s, 6 H), 0.28 (s, 3 H), 0.24 (s, 6 H), 0.23 (s, 6 H); <sup>13</sup>C NMR (100 MHz, CDCl<sub>3</sub>) δ 172.8, 166.0, 165.5, 164.9, 159.7, 157.9, 155.6, 149.2, 148.6, 146.6, 138.0, 133.4, 133.2, 132.8, 130.0 (2 C), 129.7, 129.6 (2 C), 129.4, 128.6, 128.3, 128.1, 124.8, 123.0, 121.3, 120.7, 110.2, 105.2, 96.1, 72.0, 70.7, 69.7, 68.2, 26.0, 25.9, 25.6, 19.0, 18.6, 18.5, 18.3, 17.6, -3.5, -3.6, -4.0 (2 C), -4.1, -4.2, -4.3, -4.4; HRMS (ESI) calcd for C<sub>66</sub>H<sub>89</sub>O<sub>14</sub>Si<sub>4</sub>Na [M+Na]<sup>+</sup> 1217.5324, found 1217.5314.

**3,7,4'-Tri-*O*-benzyl-5-*O*-(2'',3'',4'',6'')-tetra-*O*-benzoyl-β-D-glucopyranosyl)-kaempferol (18)**

Similar procedure as that used for the synthesis of **10** was adopted to give **18** (108 mg, 87%) as a white solide:  $[\alpha]_D^{28}$  9.0 (*c* 1.0, CHCl<sub>3</sub>); <sup>1</sup>H NMR (400 MHz, CDCl<sub>3</sub>) δ 8.08 (d, *J* = 7.2 Hz, 2 H), 7.98-7.89 (m, 6 H), 7.53-7.20 (m, 29 H), 6.99 (d, *J* = 12.8 Hz, 2 H), 6.84 (d, *J* = 2.3 Hz, 1 H), 6.64 (d, *J* = 2.3 Hz, 1 H), 6.07 (t, *J* = 9.2 Hz, 1 H), 6.00 (dd, *J* = 7.2, 9.2 Hz, 1 H), 5.86 (t, *J* = 9.6 Hz, 1 H), 5.70 (d, *J* = 7.2 Hz, 1 H), 5.12 (s, 2 H), 5.06 (s, 2 H), 4.77 (d, *J* = 10.8 Hz, 1 H), 4.72 (dd, *J* = 2.9, 12.0 Hz, 1 H), 4.70 (d, *J* = 10.8 Hz, 1 H), 4.52 (dd, *J* = 5.6, 12.0 Hz, 1 H), 4.31-4.26 (m, 1 H); <sup>13</sup>C NMR (100 MHz, CDCl<sub>3</sub>) δ 172.6, 166.0, 165.8, 165.3, 165.2, 162.0, 160.2, 157.8, 156.6, 153.3, 139.2, 137.0, 136.4, 135.6, 133.4, 133.1, 132.9, 132.7, 130.1, 130.0, 129.8 (2 C), 129.6, 129.4, 128.9, 128.8, 128.7, 128.6, 128.4, 128.3, 128.2 (2 C), 128.1, 128.0 (2 C), 127.8, 127.4 (2 C), 123.4, 114.5, 111.0, 104.7, 100.2, 97.6, 73.3, 72.8, 72.6, 71.8, 70.4, 70.0, 69.5, 62.8. HRMS (MALDI) calcd for C<sub>70</sub>H<sub>55</sub>O<sub>15</sub> [M+H]<sup>+</sup> 1135.1688, found 1135.3535.

**3,7,4'-Tri-*O*-benzyl-5-*O*-(2'',3'',4'')-tri-*O*-benzoyl-6-*O*-*tert*-butyldiphenylsilyl-β-D-glucopyranosyl)-kaempferol (19)**

Similar procedure as that used for the synthesis of **10** was adopted to give **19** (87 mg, 69%) as a white solide:  $[\alpha]_D^{28}$  6.1 (*c* 1.4, CHCl<sub>3</sub>); <sup>1</sup>H NMR (400 MHz, CDCl<sub>3</sub>) δ 8.09 (d, *J* = 7.6 Hz, 2 H), 7.93 (dd, *J* = 8.0, 8.4 Hz, 6 H), 7.65 (d, *J* = 7.2 Hz, 2 H), 7.56 (d, *J* = 7.2 Hz, 3 H), 7.46-7.13 (m, 29 H), 6.99 (d, *J* = 8.9 Hz, 2 H), 6.92 (d, *J* = 1.8 Hz, 1 H), 6.71 (d, *J* = 1.8 Hz, 1 H), 6.02-5.95 (m, 2 H), 5.81 (t, *J* = 9.6 Hz, 1 H), 5.65 (d, *J* = 6.8 Hz, 1 H), 5.12 (s, 2 H), 5.02 (s, 2 H), 4.74 (AB, 2 H), 3.98 (m, 1 H), 3.89-3.82 (m, 2 H), 0.97 (s, 9 H); <sup>13</sup>C NMR (100 MHz, CDCl<sub>3</sub>) δ 172.6, 165.9, 165.4, 164.9, 162.2, 160.2, 158.0, 157.1, 153.2, 139.3, 137.1, 136.5, 135.6, 135.5, 135.4, 133.2, 133.0, 132.9, 132.8, 132.6, 130.1, 130.0, 129.9, 129.8, 129.5, 129.2, 129.1, 128.8, 128.6, 128.3, 128.2, 128.1, 128.0 (2 C), 127.8, 127.6 (2 C), 127.4, 123.5, 114.5, 111.2, 105.3, 100.7, 97.2, 75.5, 73.3, 71.9, 70.4, 70.0, 69.1, 62.5, 26.5, 19.0; HRMS (ESI) calcd for C<sub>79</sub>H<sub>68</sub>O<sub>14</sub>SiNa [M+Na]<sup>+</sup> 1291.4271, found 1291.4280.

**3,7,4'-Tri-*O*-benzyl-5-*O*-(2'',3'',4'',6''-tetra-*O*-benzoyl-β-*D*-galactopyranosyl)-kaempferol (20)**

Similar procedure as that used for the synthesis of **10** was adopted to give **20** (123 mg, 99%) as a white solide:  $[\alpha]_D^{28}$  70.8 (*c* 1.8, CHCl<sub>3</sub>); <sup>1</sup>H NMR (400 MHz, CDCl<sub>3</sub>) δ 8.15 (d, *J* = 7.2 Hz, 2 H), 8.05 (d, *J* = 7.2 Hz, 2 H), 8.00 (d, *J* = 7.2 Hz, 2 H), 7.91 (d, *J* = 8.8 Hz, 2 H), 7.86 (d, *J* = 7.2 Hz, 2 H), 7.64 (t, *J* = 7.4 Hz, 1 H), 7.51-7.14 (m, 22 H), 6.98 (d, *J* = 9.0 Hz, 2 H), 6.95 (d, *J* = 2.3 Hz, 1 H), 6.68 (d, *J* = 2.3 Hz, 1 H), 6.34 (dd, *J* = 8.0, 10.4 Hz, 1 H), 6.09 (d, *J* = 2.9 Hz, 1 H), 5.74 (dd, *J* = 3.4, 10.4 Hz, 1 H), 5.60 (d, *J* = 8.0 Hz, 1 H), 5.11 (s, 2 H), 5.09 (s, 2 H), 4.71 (dd, *J* = 4.2, 11.2 Hz, 1 H), 4.62 (AB, 2 H), 4.52-4.45 (m, 2 H); <sup>13</sup>C NMR (100 MHz, CDCl<sub>3</sub>) δ 172.6, 166.0, 165.6, 165.4, 162.1, 160.1, 157.9, 157.3, 153.2, 139.3, 137.0, 136.4, 135.6, 133.6, 133.2, 133.1, 132.6, 130.0 (2 C), 129.9, 129.8, 129.7, 129.3, 128.9, 128.7 (2 C), 128.6, 128.3, 128.2, 128.1, 128.0, 127.8, 127.4, 123.4, 114.5, 111.0, 104.6, 101.3, 97.3, 73.2, 71.9, 70.4, 70.0, 69.2, 68.1, 62.4; HRMS (ESI) calcd for C<sub>70</sub>H<sub>54</sub>O<sub>15</sub> [M+H]<sup>+</sup> 1135.3535, found 1135.3527.

**3,7,4'-Tri-*O*-benzyl-2'',3'',4''-tri-*O*-benzoyl-α-*L*-rhamnopyranosyl)-kaempferol (21)**

Similar procedure as that used for the synthesis of **10** was adopted to give **21** (100 mg,

99%) as a white solide:  $[\alpha]_D^{28}$  22.3 (*c* 0.6, CHCl<sub>3</sub>); <sup>1</sup>H NMR (400 MHz, CDCl<sub>3</sub>) δ 8.17 (d, *J* = 7.6 Hz, 2 H), 8.05 (d, *J* = 7.6 Hz, 2 H), 8.00 (d, *J* = 8.4 Hz, 2 H), 7.89 (d, *J* = 7.6 Hz, 2 H), 7.64 (t, *J* = 7.2 Hz, 1 H), 7.53-7.26 (m, 23 H), 7.03 (d, *J* = 8.4 Hz, 2 H), 6.80 (s, 1 H), 6.72 (s, 1 H), 6.43 (dd, *J* = 3.4, 10.4 Hz, 1 H), 6.14 (s, 1 H), 5.92 (s, 1 H), 5.84 (t, *J* = 10.0 Hz, 1 H), 5.22-5.10 (m, 6 H), 4.61-4.58 (m, 1 H); <sup>13</sup>C NMR (100 MHz, CDCl<sub>3</sub>) δ 173.2, 166.0, 165.4, 165.2, 162.4, 160.2, 158.4, 156.2, 153.7, 139.6, 137.0, 136.5, 135.7, 133.4, 133.2, 132.9, 130.2, 030.0, 129.9, 129.7, 129.5, 129.4, 129.3, 129.1, 128.7, 128.6 (2 C), 128.4, 128.2, 128.1, 127.9, 127.5 (2 C), 123.5, 114.6, 110.7, 101.4, 96.6, 96.5, 74.0, 71.9, 70.7, 70.5, 70.0, 69.9, 68.4; HRMS (ESI) calcd for C<sub>63</sub>H<sub>50</sub>O<sub>13</sub>Na [M+Na]<sup>+</sup> 1037.3144, found 1037.3140.

**3,7,4'-Tri-*O*-hexanoyl-5-*O*-(2'',3'',4'',6'')-tetra-*O*-benzoyl-β-D-glucopyranosyl)-kaempferol (22)**

Similar procedure as that used for the synthesis of **10** was adopted to give **22** (115 mg, 99%) as a white solide:  $[\alpha]_D^{28}$  11 (*c* 1.3, CHCl<sub>3</sub>); <sup>1</sup>H NMR (400 MHz, CDCl<sub>3</sub>) δ 8.01-7.90 (m, 8 H), 7.80 (d, *J* = 8.8 Hz, 2 H), 7.54-7.43 (m, 4 H), 7.40-7.30 (m, 8 H), 7.21 (d, *J* = 8.8 Hz, 2 H), 7.08 (d, *J* = 2.1 Hz, 1 H), 6.96 (d, *J* = 2.1 Hz, 1 H); 6.03 (t, *J* = 9.2 Hz, 1 H), 5.94 (dd, *J* = 7.2, 8.8 Hz, 1 H), 5.82 (t, *J* = 9.2 Hz, 1 H), 5.64 (d, *J* = 7.2 Hz, 1 H), 4.73 (dd, *J* = 3.2, 12.0 Hz, 1 H), 4.50 (dd, *J* = 5.6, 12.4 Hz, 1 H), 4.33 (m, 1 H), 2.60 (t, *J* = 7.6 Hz, 2 H), 2.46-2.41 (m, 4 H), 1.79-1.60 (m, 6 H), 1.43-1.28 (m, 12 H), 0.95-0.88 (m, 9 H); <sup>13</sup>C NMR (100 MHz, CDCl<sub>3</sub>) δ 171.7, 170.9, 170.4, 169.4, 166.0, 165.8, 165.3, 165.1, 157.1, 156.5, 154.2, 153.3, 152.7, 134.1, 133.4, 133.2, 133.0, 132.7, 130.0, 129.9, 129.8, 129.7, 129.5, 129.4, 128.9, 128.8, 128.4, 128.3 (2 C), 128.0, 127.1, 121.8, 113.8, 109.5, 106.5, 100.0, 72.7, 71.7, 69.4, 62.9, 34.3, 34.2, 33.7, 31.2, 31.1, 24.5, 24.3, 24.2, 22.3, 13.9; HRMS (ESI) calcd for C<sub>67</sub>H<sub>66</sub>O<sub>18</sub>Na [M+Na]<sup>+</sup> 1181.4141, found 1181.4148.

**3,7,4'-Tri-*O*-hexanoyl-5-*O*-(2'',3'',4'')-tri-*O*-benzoyl-6-*O*-*tert*-butyldiphenylsilyl-β-D-glucopyranosyl)-kaempferol (23)**

Similar procedure as that used for the synthesis of **10** was adopted to give **23** (127 mg, 98%) as a white solide:  $[\alpha]_D^{28}$  14.7 (*c* 1.36, CHCl<sub>3</sub>); <sup>1</sup>H NMR (400 MHz, CDCl<sub>3</sub>) δ 8.00 (d, *J* = 7.2 Hz, 2 H), 7.90-7.86 (m, 4 H), 7.81 (d, *J* = 8.8 Hz, 2 H), 7.57-7.27 (m,

14 H), 7.25-7.18 (m, 5 H), 7.16 (d,  $J = 2.2$  Hz, 1 H), 7.03 (d,  $J = 2.2$  Hz, 1 H), 5.95-5.93 (m, 2 H), 5.78-5.73 (m, 1 H), 5.61 (d,  $J = 7.2$  Hz, 1 H), 4.05-4.01 (m, 1 H), 6.90-3.82 (m, 2 H), 2.60 (t,  $J = 3.4$  Hz, 2 H), 2.46-2.40 (m, 4 H), 1.81-1.74 (m, 2 H), 1.70-1.60 (m, 4 H), 1.42-1.26 (m, 12 H), 0.96-0.86 (m, 9 H);  $^{13}\text{C}$  NMR (100 MHz,  $\text{CDCl}_3$ )  $\delta$  171.7, 170.9, 170.4, 169.4, 165.9, 165.4, 164.9, 157.2, 157.1, 154.2, 153.2, 152.7, 135.5, 135.4, 134.1, 133.2, 133.0, 132.8, 132.5, 130.0, 129.9 (2 C), 129.8, 129.6, 129.4, 129.2, 129.0, 128.3, 128.2, 128.0, 127.6, 127.1, 121.8, 113.8, 109.3, 106.4, 100.5, 73.1, 71.7, 68.9, 62.5, 34.3 (2 C), 33.7, 31.2 (2 C), 31.1, 26.6, 24.5, 24.2, 22.2 (2 C), 19.1, 13.9, 13.8 (2 C); HRMS (MALDI) calcd for  $\text{C}_{76}\text{H}_{80}\text{O}_{17}\text{Si}_3\text{Na}$   $[\text{M}+\text{Na}]^+$  1315.5062, found 1315.5057.

**3,7,4'-Tri-*O*-hexanoyl-5-*O*-(2'',3'',4'',6''-tetra-*O*-benzoyl- $\beta$ -D-galactopyranosyl)-kaempferol (24)**

Similar procedure as that used for the synthesis of **10** was adopted to give **24** (115 mg, 99%) as a white solid:  $[\alpha]_{\text{D}}^{28}$  66.3 ( $c$  2.4,  $\text{CHCl}_3$ );  $^1\text{H}$  NMR (400 MHz,  $\text{CDCl}_3$ )  $\delta$  8.13 (d,  $J = 7.2$  Hz, 2 H), 8.01 (dd,  $J = 7.2, 8.8$  Hz, 4 H), 7.85 (d,  $J = 7.2$  Hz, 2 H), 7.79 (d,  $J = 8.8$  Hz, 2 H), 7.64 (t,  $J = 7.6$  Hz, 1 H), 7.58-7.25 (m, 11 H), 7.20 (d,  $J = 8.8$  Hz, 2 H), 7.12 (d,  $J = 2.1$  Hz, 1 H), 7.03 (d,  $J = 2.0$  Hz, 1 H), 6.27 (dd,  $J = 8.0, 10.3$  Hz, 1 H), 6.07 (d,  $J = 3.2$  Hz, 1 H), 4.68 (dd,  $J = 6.8, 11.1$  Hz, 1 H), 4.55-4.47 (m, 2 H), 2.59 (t,  $J = 7.6$  Hz, 2 H), 2.44-2.37 (m, 4 H), 1.78-1.57 (m, 6 H), 1.40-1.28 (m, 12 H), 0.95-0.88 (m, 9 H);  $^{13}\text{C}$  NMR (100 MHz,  $\text{CDCl}_3$ )  $\delta$  171.7, 171.0, 170.4, 169.3, 166.0, 165.6, 165.5, 157.1 (2 C), 154.2, 153.3, 152.7, 134.1, 133.6, 133.2 (2 C), 132.6, 130.1, 130.0, 129.8 (2 C), 129.4, 128.9, 128.7, 128.6, 128.4, 128.3, 128.0, 127.0, 121.8, 113.7, 109.1, 106.6, 101.0, 71.9, 71.6, 69.1, 68.0, 62.2, 34.3, 34.2, 33.6, 31.2 (2 C), 31.1, 24.5, 24.2 (2 C), 22.2, 13.4; HRMS (ESI) calcd for  $\text{C}_{67}\text{H}_{66}\text{O}_{18}\text{Na}$   $[\text{M}+\text{Na}]^+$  1181.4146, found 1181.4140.

**3,7,4'-Tri-*O*-hexanoyl-2'',3'',4''-tri-*O*-benzoyl- $\alpha$ -L-rhamnopyranosyl)-kaempferol (25)**

Similar procedure as that used for the synthesis of **10** was adopted to give **25** (85 mg, 82%) as a white solid:  $[\alpha]_{\text{D}}^{28}$  15.9 ( $c$  0.9,  $\text{CHCl}_3$ );  $^1\text{H}$  NMR (400 MHz,  $\text{CDCl}_3$ )  $\delta$  8.15 (d,  $J = 7.2$  Hz, 2 H), 8.04 (d,  $J = 7.6$  Hz, 2 H), 7.90 (t,  $J = 5.8, 8.4$  Hz, 4 H), 7.64

(t,  $J = 7.4$  Hz, 1 H), 7.54-7.49 (m, 3 H), 7.44-7.37 (m, 3 H), 7.29-7.24 (m, 4 H), 7.10 (d,  $J = 1.8$  Hz, 1 H), 6.94 (d,  $J = 1.8$  Hz, 1 H), 6.36 (dd,  $J = 3.3, 10.1$  Hz, 1 H), 6.05 (s, 1 H), 5.89 (s, 1 H), 5.81 (t,  $J = 10.0$  Hz, 1 H), 4.44-4.38 (m, 1 H), 2.68 (t,  $J = 7.2$  Hz, 2 H), 2.62 (td,  $J = 3.3, 7.6$  Hz, 4 H), 1.80 (dd,  $J = 7.2, 14.4$  Hz, 6 H), 1.41-1.39 (m, 12 H), 1.35 (d,  $J = 6.2$  Hz, 3 H), 0.96 (dd,  $J = 6.8, 13.0$  Hz, 6 H), 0.86 (t,  $J = 6.8$  Hz, 3 H);  $^{13}\text{C}$  NMR (100 MHz,  $\text{CDCl}_3$ )  $\delta$  171.7, 171.0 (2 C), 165.9, 165.4, 165.0, 157.6, 156.1, 154.6, 153.6, 152.8, 134.2, 133.5, 133.2, 132.8, 129.9, 129.7, 129.5, 129.4, 129.3 (2 C), 128.6, 128.3, 128.2, 127.1, 121.9, 113.1, 105.7, 105.4, 96.3, 71.6, 70.6, 69.7, 68.3, 34.3, 33.9, 31.2 (2 C), 31.1, 24.5, 24.4 (2 C), 22.3, 22.2, 17.6, 13.8 (3 C); HRMS (ESI) calcd for  $\text{C}_{60}\text{H}_{62}\text{O}_{16}\text{Na}$   $[\text{M}+\text{Na}]^+$  1061.3934, found 1061.3930.

**3,7,4'-Tri-*O*-hexanoyl-5-*O*-(2'',3'',4''-tri-*O*-benzoyl- $\beta$ -D-glucopyranosyl)-kaempferol (26)**

To a solution of 23 (70 mg, 0.06 mmol) in THF (2 mL) was added HOAc (0.02 mL, 0.36 mmol) and TBAF (1 mmol/ml in THF, 0.18 mL, 0.18 mmol) at 0 °C. Then the reaction mixture was warmed to room temperature and stirred overnight. Ethyl acetate (20 mL) was added and the solution was washed with water, saturated  $\text{NaHCO}_3$  and brine successively, and then dried over  $\text{Na}_2\text{SO}_4$ . Filtration and concentration under reduced pressure to afford the crude product which was further purified by silica gel chromatography (eluent system: PE : EA = 4 : 1) to afford **26** (32 mg, 57%) as a white solid:  $[\alpha]_D^{28}$  -9.6 (c 1.1,  $\text{CHCl}_3$ );  $^1\text{H}$  NMR (400 MHz,  $\text{CDCl}_3$ )  $\delta$  8.01 (d,  $J = 7.2$  Hz, 2 H), 7.99 (d,  $J = 7.6$  Hz, 2 H), 7.90 (d,  $J = 8.4$  Hz, 2 H), 7.81 (d,  $J = 8.4$  Hz, 2 H), 7.55-7.28 (m, 9 H), 7.22 (d,  $J = 8.4$  Hz, 2 H), 7.08 (d,  $J = 2.1$  Hz, 1 H), 7.03 (d,  $J = 2.1$  Hz, 1 H), 6.05 (t,  $J = 9.2$  Hz, 1 H), 5.95 (dd,  $J = 7.2, 9.6$  Hz, 1 H), 5.62 (d,  $J = 7.6$  Hz, 1 H), 5.62 (dd,  $J = 7.6, 9.6$  Hz, 1 H), 3.98-3.95 (m, 1 H), 3.88-3.80 (m, 2 H), 2.60 (t,  $J = 7.6$  Hz, 4 H), 2.48 (t,  $J = 7.6$  Hz, 2 H), 1.79-1.72 (m, 4 H), 1.69-1.62 (m, 2 H), 1.40-1.29 (m, 12 H), 0.95-0.89 (m, 9 H);  $^{13}\text{C}$  NMR (100 MHz,  $\text{CDCl}_3$ )  $\delta$  171.7, 171.2, 170.5, 169.6, 165.8, 165.7, 165.2, 157.2, 156.3, 154.1, 153.4, 152.8, 134.1, 133.5, 133.2, 132.7, 129.9 (2 C), 129.8, 129.7, 129.4, 128.9, 128.7, 128.4, 128.2, 128.0, 127.0, 121.8, 76.0, 72.5, 71.7, 69.8, 61.7, 34.3 (2 C), 33.7, 31.2, 31.1, 24.4, 24.3, 24.2, 22.2, 13.9, 13.8. HRMS (MALDI) calcd for  $\text{C}_{60}\text{H}_{63}\text{O}_{17}$   $[\text{M}+\text{H}]^+$  1055.4040, found

1055.4060.

**3,7,4'-Tri-*O*-hexanoyl-5-*O*-[2'',3'',4''-tri-*O*-benzoyl-6''-*O*-(2''',3''',4''')-tri-*O*-benzoyl- $\alpha$ -L-rhamnopyranonyl]- $\beta$ -D-glucopyranosyl]-kaempferol (27)**

Similar procedure as that used for the synthesis of **10** was adopted to give **27** (36 mg, 82%) as a white solide:  $[\alpha]_D^{28}$  33.0 (*c* 0.57, CHCl<sub>3</sub>); <sup>1</sup>H NMR (400 MHz, CDCl<sub>3</sub>)  $\delta$  8.03 (dd, *J* = 7.2, 7.6 Hz, 6 H), 7.95 (t, *J* = 8.0 Hz, 4 H), 7.78 (d, *J* = 8.8 Hz, 4 H), 7.59 (t, *J* = 7.2 Hz, 1 H), 7.52-7.30 (m, 15 H), 7.23-7.17 (m, 4 H), 7.08 (d, *J* = 1.8 Hz, 1 H), 7.05 (s, 1 H), 6.05 (t, *J* = 9.2 Hz, 1 H), 5.94 (dd, *J* = 7.2, 9.2 Hz, 1 H), 5.72-5.54 (m, 5 H), 4.98 (s, 1 H), 4.30 (t, *J* = 6.8 Hz, 1 H), 4.10-3.90 (m, 3 H), 2.60 (t, *J* = 7.6 Hz, 2 H), 2.46-2.39 (m, 4 H), 1.81-1.73 (m, 2 H), 1.67-1.53 (m, 4 H), 1.43-1.18 (m, 15 H), 0.96-0.88 (m, 6 H), 0.82 (t, *J* = 7.2 Hz, 3 H); <sup>13</sup>C NMR (100 MHz, CDCl<sub>3</sub>)  $\delta$  171.8, 171.1, 170.4, 169.5, 165.7, 165.3, 165.1 (2 C), 157.2, 156.4, 154.3, 153.3, 152.7, 134.1, 133.5, 133.3, 133.2, 133.1, 132.9, 132.7, 130.0, 129.9, 129.8, 129.7, 129.6, 129.5, 129.3, 128.9, 128.8, 128.5 (2 C), 128.4, 128.3, 128.2, 128.0, 127.2, 121.8, 113.8, 109.8, 106.8, 100.2, 98.1, 74.4, 72.5, 71.7 (2 C), 70.4, 69.9, 69.7, 67.2, 66.9, 34.4, 34.1, 33.7, 31.2, 31.0, 29.7, 24.5, 24.2 (2 C), 22.3, 22.2, 17.5, 13.9 (2 C), 13.8. HRMS (MALDI) calcd for C<sub>87</sub>H<sub>85</sub>O<sub>24</sub> [M+H]<sup>+</sup> 1513.5419, found 1513.5425.

**3,7,4'-Tri-*O*-benzyl-5-*O*-(2'',3'',4''-tri-*O*-benzoyl- $\beta$ -D-glucopyranosyl)-kaempferol (29)**

Similar procedure as that used for the synthesis of **26** was adopted to give **29** (130 mg, 99%) as a white solide:  $[\alpha]_D^{28}$  4.7 (*c* 1.2, CHCl<sub>3</sub>); <sup>1</sup>H NMR (400 MHz, CDCl<sub>3</sub>)  $\delta$  8.06 (t, *J* = 7.6 Hz, 4 H), 7.96 (dd, *J* = 6.4, 8.0 Hz, 4 H), 7.60 (t, *J* = 7.2 Hz, 1 H), 7.46-7.24 (m, 23 H), 7.01 (d, *J* = 8.4 Hz, 2 H), 6.87 (s, 1 H), 6.68 (d, *J* = 10.4 Hz, 1 H), 6.09-6.02 (m, 2 H), 5.76-5.69 (m, 2 H), 5.13 (s, 4 H), 4.74 (s, 2 H), 4.03 (s, 1 H), 3.94 (s, 2 H); <sup>13</sup>C NMR (100 MHz, CDCl<sub>3</sub>)  $\delta$  172.7, 165.9, 165.6, 165.0, 162.3, 160.0, 157.6, 157.4, 152.9, 139.2, 136.9, 136.4, 135.8, 133.3, 133.0, 132.6, 129.9, 129.8 (2 C), 129.0, 128.9, 128.8, 128.5, 128.3, 128.2, 128.1, 128.0, 127.9, 127.7, 127.6, 127.3, 123.2, 114.3, 110.3, 102.1, 100.5, 97.0, 76.7, 76.0, 73.3, 73.0, 71.6, 70.4, 69.8, 69.7, 61.5; HRMS (ESI) calcd for C<sub>63</sub>H<sub>50</sub>O<sub>14</sub>Na [M+Na]<sup>+</sup> 1053.3093, found 1053.3104.

**3,7,4'-Tri-*O*-benzyl-5-*O*-[2'',3'',4''-tri-*O*-benzoyl-6''-*O*-(2''',3''',4''')-tri-*O*-benzoyl**

**- $\alpha$ -L-rhamnopyranonyl)- $\beta$ -D-glucopyranosyl]-kaempferol (30)**

Similar procedure as that used for the synthesis of **10** was adopted to give **27** (106 mg, 67%) as a white solid:  $[\alpha]_D^{28}$  21.5 (*c* 1.2, CHCl<sub>3</sub>); <sup>1</sup>H NMR (400 MHz, CDCl<sub>3</sub>)  $\delta$  8.1 (d, *J* = 7.2 Hz, 2 H), 8.03 (dd, *J* = 7.6, 8.4 Hz, 4 H), 7.94 (d, *J* = 7.6 Hz, 4 H), 7.87 (d, *J* = 8.8 Hz, 2 H), 7.87 (d, *J* = 7.2 Hz, 2 H), 7.57-7.18 (m, 33 H), 6.97 (d, *J* = 8.8 Hz, 2 H), 6.91 (d, *J* = 2.0 Hz, 1 H), 6.49 (d, *J* = 2.0 Hz, 1 H), 6.09 (t, *J* = 9.2 Hz, 1 H), 6.00 (dd, *J* = 7.2, 9.2 Hz, 1 H), 5.75-5.54 (m, 5 H), 5.11 (s, 2 H), 5.10 (AB, 2 H), 4.99 (s, 1 H), 4.80 (AB, 2 H), 4.31-4.25 (m, 1 H), 4.11-4.02 (m, 1 H), 4.02-3.91 (m, 2 H); <sup>13</sup>C NMR (100 MHz, CDCl<sub>3</sub>)  $\delta$  172.7, 165.7, 165.3, 165.1, 162.1, 160.1, 157.8, 156.4, 153.3, 139.2, 137.0, 136.4, 135.8, 133.4, 133.2 (2 C), 133.1, 132.8, 132.7, 130.1, 130.0, 129.9 (2 C), 129.8, 129.7, 129.6, 129.4, 129.2, 128.9, 128.8, 128.7, 128.6 (2 C), 128.4, 128.3, 128.2, 128.1, 128.0, 127.8, 127.4, 127.3, 123.4, 114.4, 111.1, 105.2, 100.2, 98.0, 97.7, 74.4, 73.3, 72.6, 71.8, 71.7, 70.4, 69.9, 69.8 (2 C), 66.9 (2 C); HRMS (ESI) calcd for C<sub>90</sub>H<sub>73</sub>O<sub>21</sub> [M+H]<sup>+</sup> 1489.4639, found 1489.4647.

**3,7,4'-Tri-O-acetyl-5-O-[2'',3'',4''-tri-O-acetyl-6''-O-(2''',3''',4''')-tri-O-acetyl- $\alpha$ -L-rhamnopyranonyl)- $\beta$ -D-glucopyranosyl]-kaempferol (28)**

To a solution of **30** in MeOH (5 mL) and THF (5 mL) was added NaOMe (in MeOH solution). The reaction mixture was stirred at room temperature for 6 hours, then <sup>+</sup>H resin was added to quench the reaction. Filtration and concentration to get the crude deacylated intermediate which was not purified for the next hydrogenolysis step.

The above obtained intermediate was dissolved in ethyl acetate (2 mL) and ethanol (2 mL), to which 10% Pd/C was added. The reaction flask was evacuated and then refilled with H<sub>2</sub>. After repeating this process three times, the mixture was stirred at room temperature for another 24 hours. Filtration and concentration yield the crude **28a** which was put directly to next acetylation step.

To a solution of **28a** in dry pyridine (1 mL) was added Ac<sub>2</sub>O (1 mL) dropwise at 0 °C. Then the addition was completed, the temperature was raised to room temperature. The stirring was continued for another 36 hours, at which time TLC showed that the starting material disappeared and one new compound was formed. Ethyl acetate (30 mL) was added to dilute the reaction mixture, the solution was washed with 1 N HCl,

saturated NaHCO<sub>3</sub>, and brine successively and then dried over Na<sub>2</sub>SO<sub>4</sub>. Filtration and concentration under reduced pressure to give the crude product which was further purified by silica gel chromatography (eluent system: PE : EA = 2 : 1) to afford **30** (20 mg, 99%) as a white solide:  $[\alpha]_D^{28}$  -129.0 (*c* 0.25, CHCl<sub>3</sub>); <sup>1</sup>H NMR (400 MHz, CDCl<sub>3</sub>) δ 7.86 (d, *J* = 8.8 Hz, 2 H), 7.25 (d, *J* = 8.8 Hz, 2 H), 7.15 (d, *J* = 2.0 Hz, 1 H), 6.92 (d, *J* = 2.0 Hz, 1 H), 5.43 (dd, *J* = 7.8, 9.4 Hz, 1 H), 5.32 (dd, *J* = 9.3, 11.0 Hz, 1 H), 5.24-5.21 (m, 2 H), 5.15 (d, *J* = 7.7 Hz, 1 H), 5.13 (t, *J* = 10.0 Hz, 1 H), 5.06 (t, *J* = 9.8 Hz, 1 H), 4.74 (s, 1 H), 3.93-3.89 (m, 1 H), 3.85 (dd, *J* = 5.6, 9.7 Hz, 1 H), 3.80 (d, *J* = 11.4 Hz, 1 H), 3.71 (dd, *J* = 6.0, 11.6 Hz, 1 H), 2.34 (s, 3 H), 2.33 (s, 3 H), 2.31 (s, 3 H), 2.10 (s, 3 H), 2.07 (s, 3 H), 2.06 (s, 3 H), 2.05 (s, 3 H), 2.04 (s, 3 H), 1.97 (s, 3 H); <sup>13</sup>C NMR (100 MHz, CDCl<sub>3</sub>) δ 170.3, 170.0, 169.8 (2 C), 169.5, 169.4, 168.9, 168.2, 167.9, 157.4, 157.2, 154.4, 153.3, 152.7, 134.3, 129.5, 127.1, 122.0, 113.3, 107.8, 106.2, 100.5, 98.0, 77.2, 73.5, 72.4, 70.8, 70.5, 69.3, 69.1, 69.0, 66.6, 21.1, 20.8, 20.7, 20.6 (2 C), 17.3; HRMS (ESI) calcd for C<sub>45</sub>H<sub>49</sub>O<sub>24</sub> [M+H]<sup>+</sup> 973.2613, found 973.2626.

**Key correlations in compound 28:**

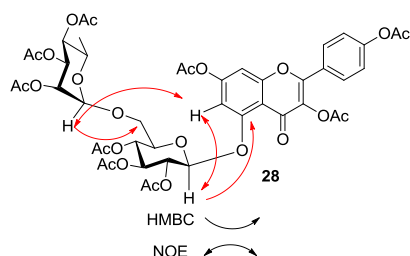

**Figure 1.** Key HMBC and NOE correlations in **28**



12.6701

7.8600  
7.8555  
7.8386  
7.8338  
7.2603  
7.2600  
6.9398  
6.9218  
6.3669  
6.3619  
6.2673

1.0060  
0.9928  
0.9906  
0.8494  
0.8457  
0.2642  
0.2615  
0.2396  
0.2370  
0.1490  
0.1436

Parameter Value  
Solvent CDC13  
Spectrometer Frequency 400.13  
Nucleus 1H

0.92

2.04 2.06 1.00 1.00

18.99 11.03 12.35 6.63

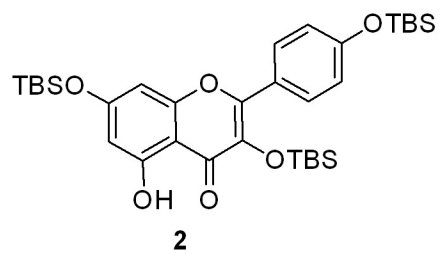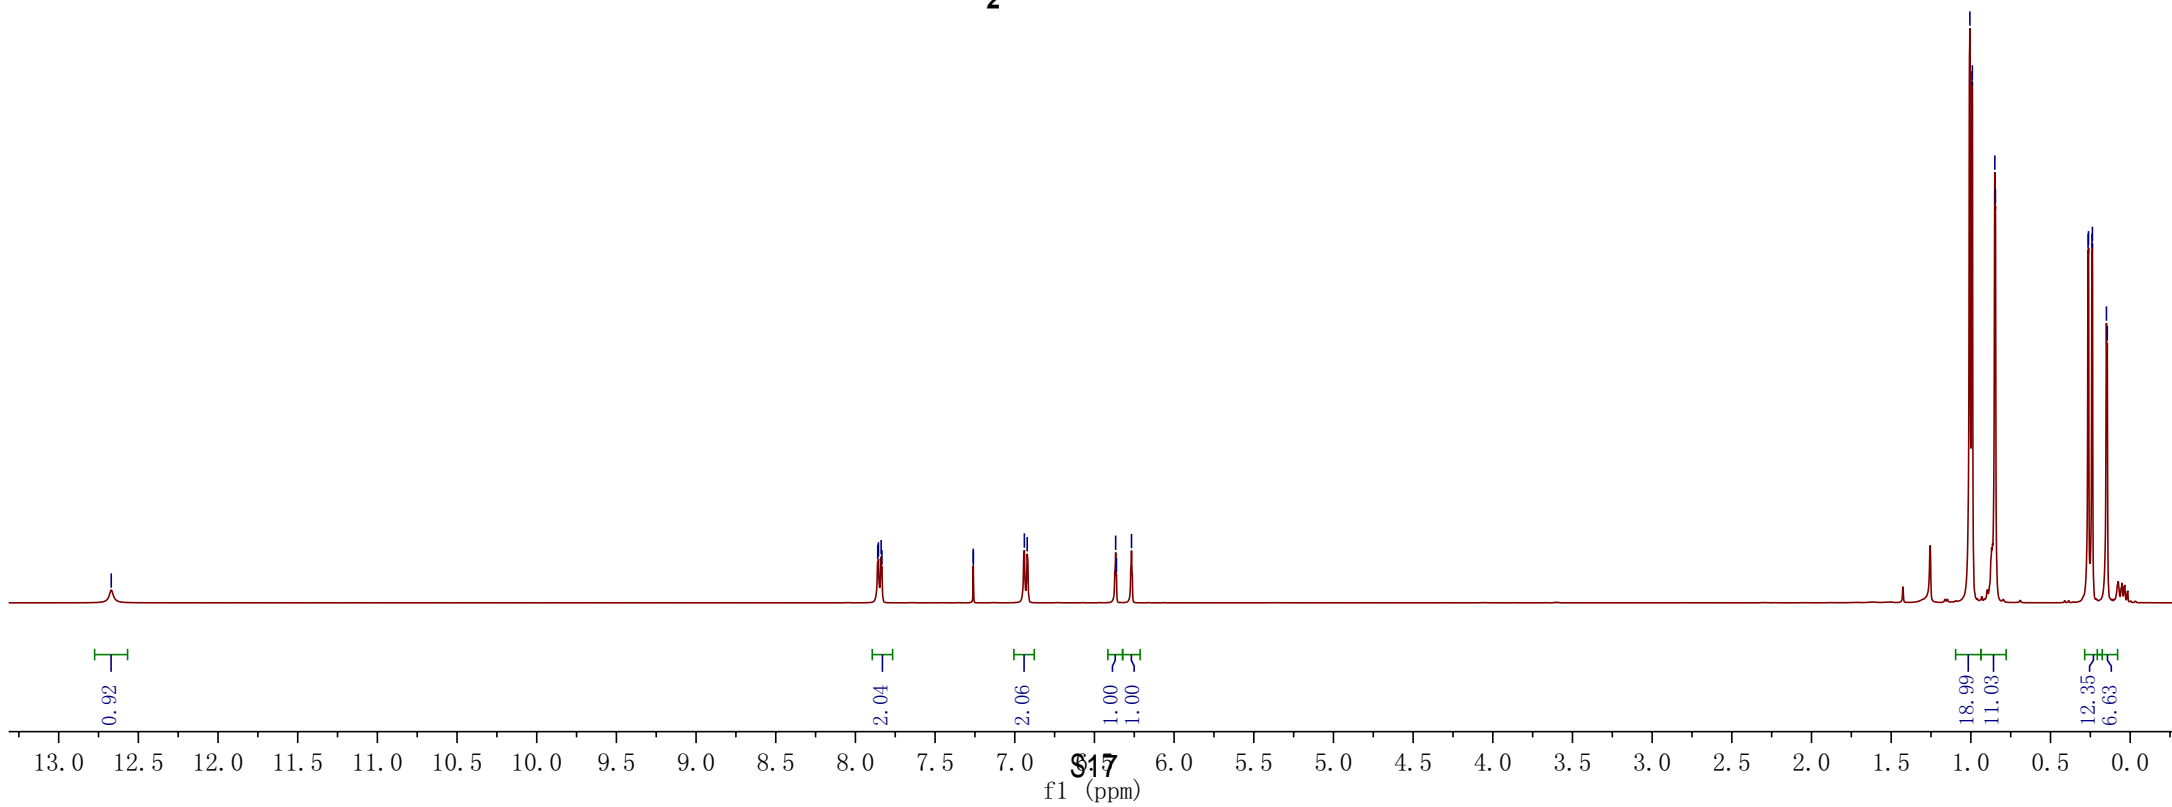

— 178.1089  
 — 161.7759  
 — 157.6340  
 — 156.4440  
 — 153.1346  
 — 135.6366  
 — 130.4737  
 — 124.2763  
 — 119.9756  
 — 106.0847  
 — 102.9773  
 — 98.2708  
 — 77.3174  
 — 77.0000  
 — 76.9998  
 — 76.6820  
 — 25.7130  
 — 25.6673  
 — 25.5328  
 — 18.6393  
 — 18.3048  
 — 18.2167  
 — 3.9543  
 — 4.3787

| Parameter              | Value  |
|------------------------|--------|
| Solvent                | CDC13  |
| Experiment             | 1D     |
| Spectrometer Frequency | 100.61 |
| Nucleus                | 13C    |

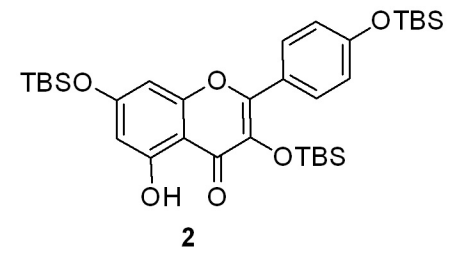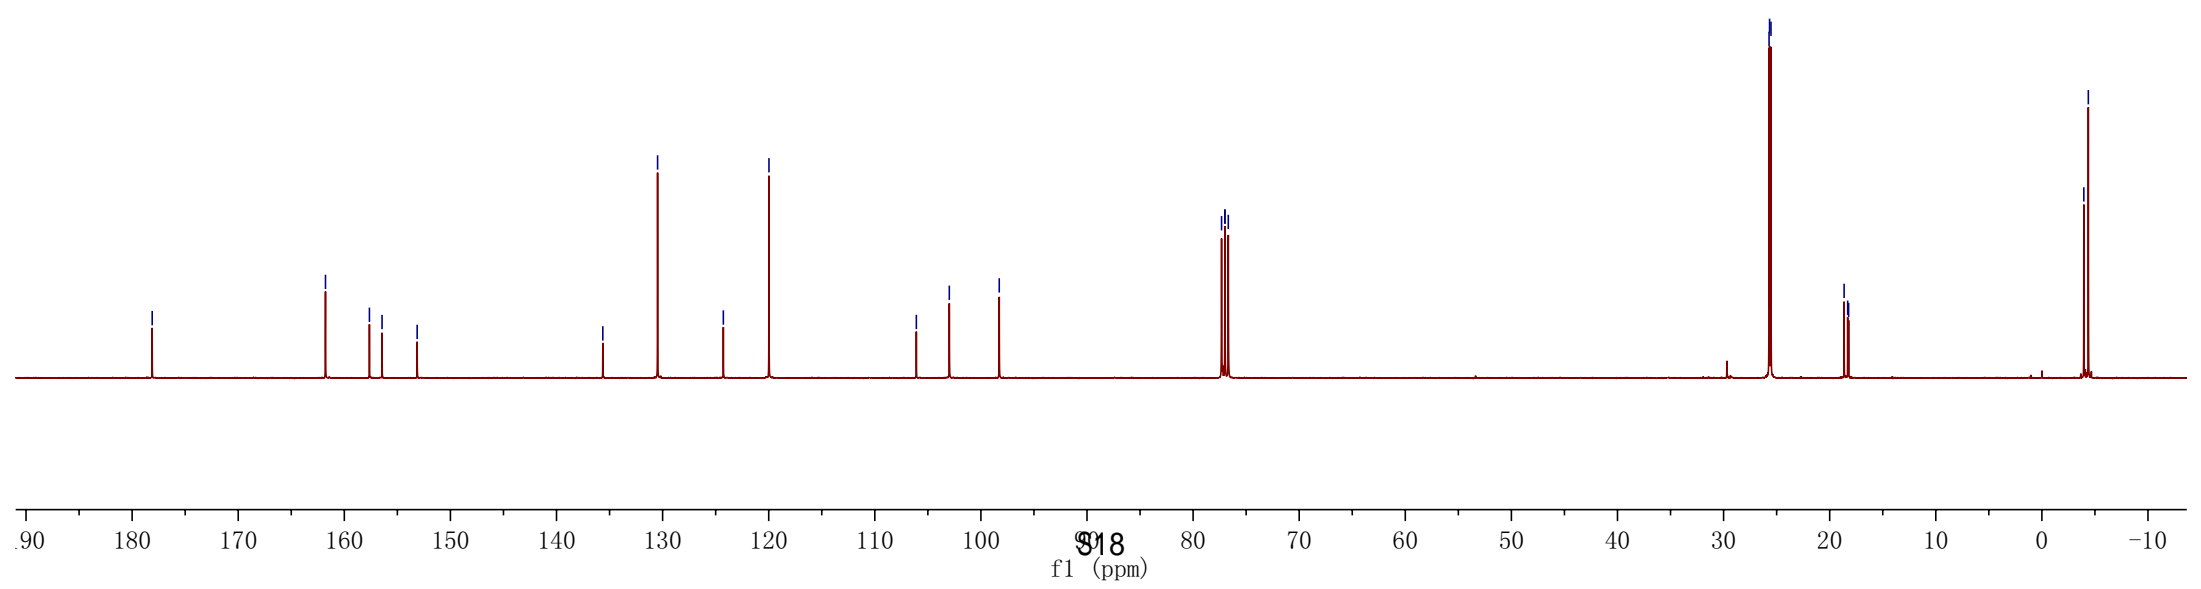

| Parameter                | Value (f2, f1)   |
|--------------------------|------------------|
| 1 Solvent                | CDC13            |
| 2 Experiment             | 2D-HMBC          |
| 3 Spectrometer Frequency | (400.13, 100.61) |
| 4 Nucleus                | (1H, 13C)        |

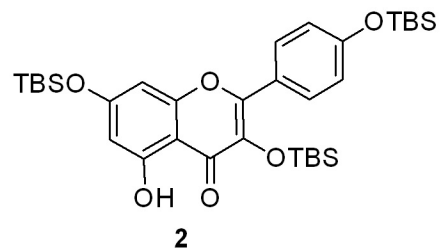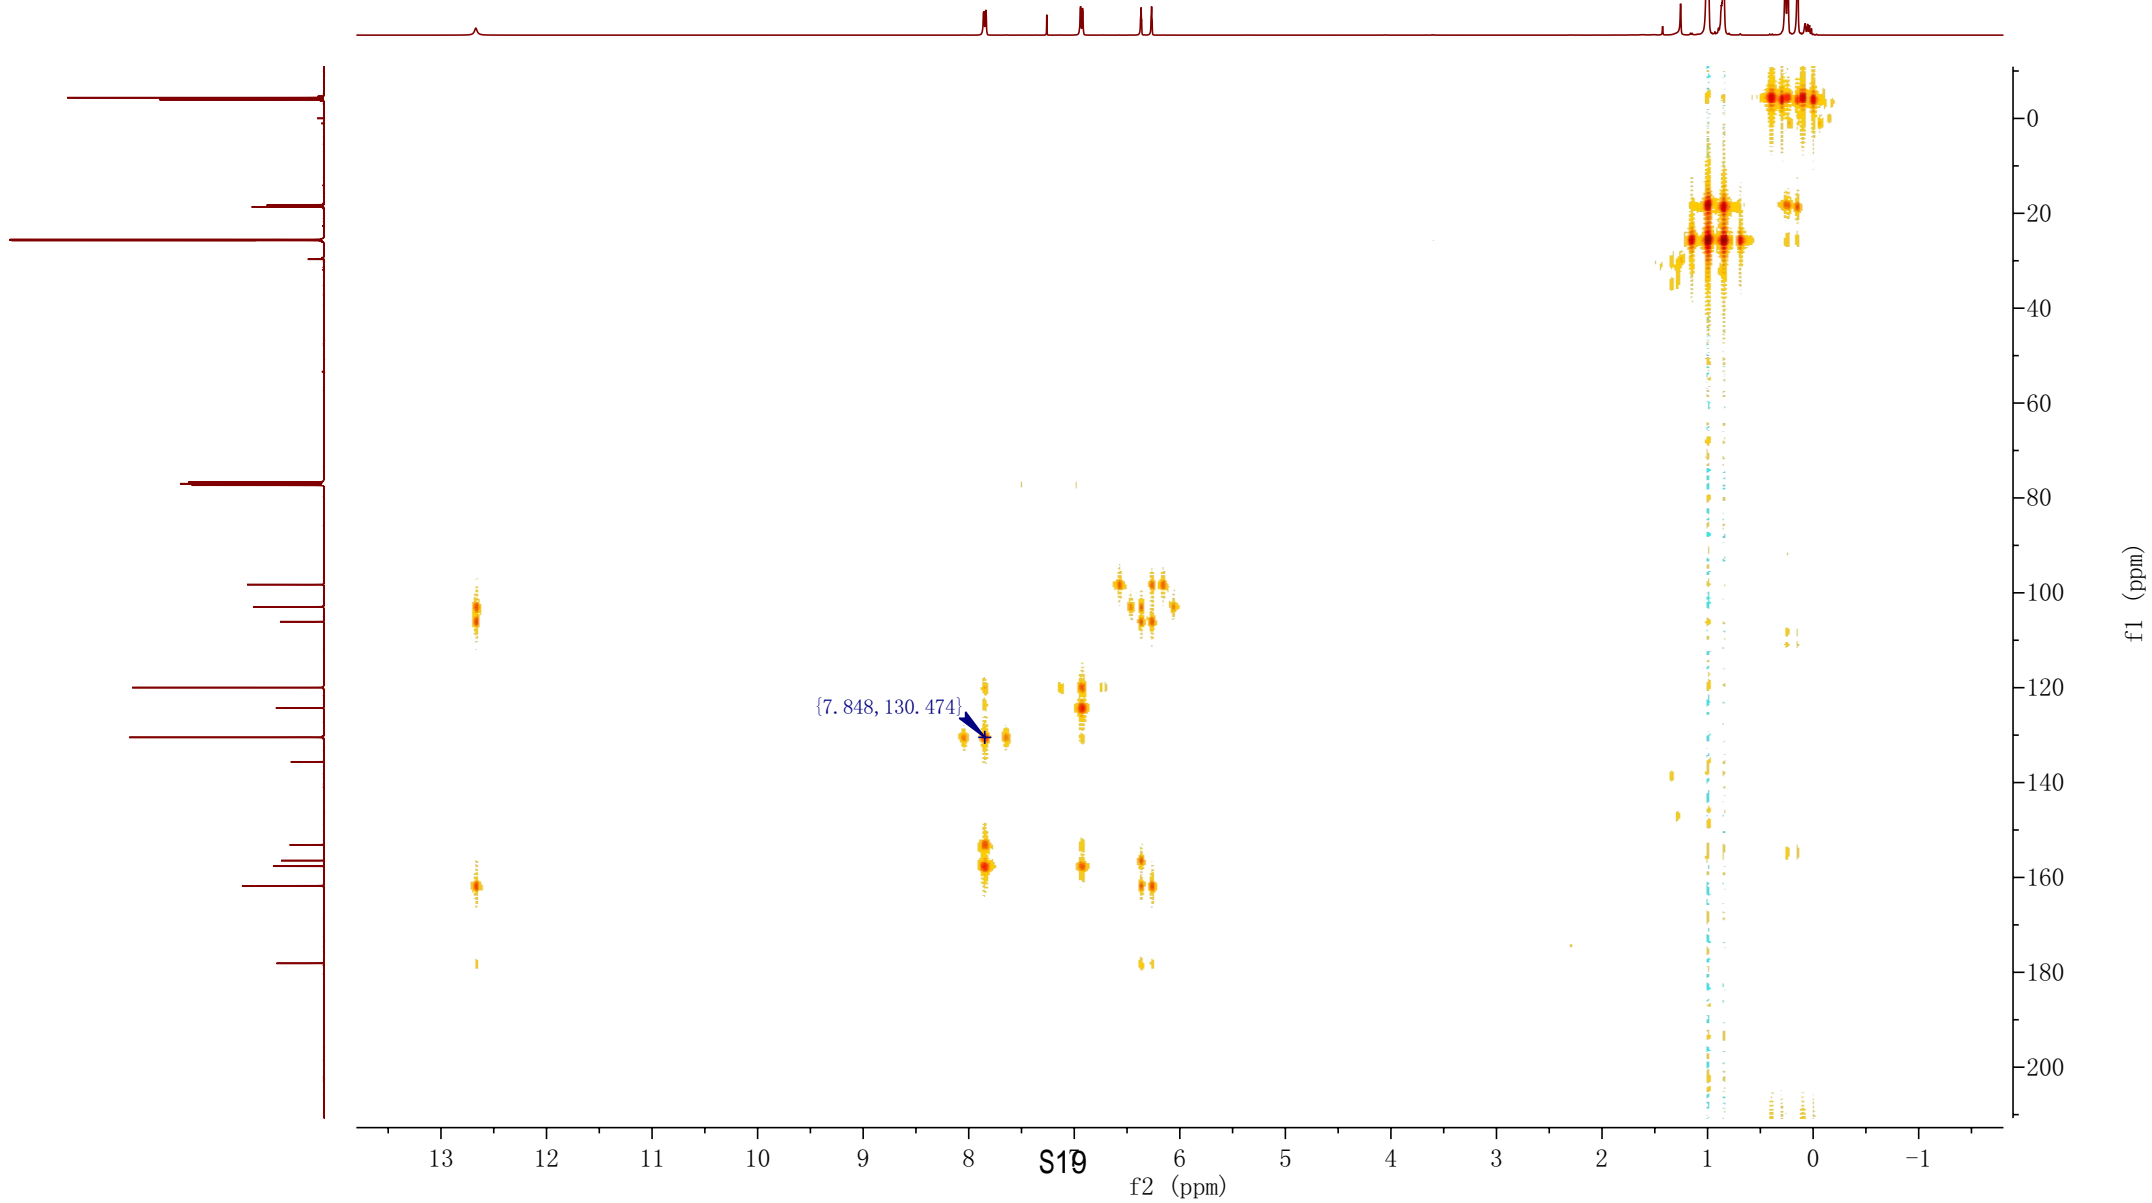

| Parameter                | Value (f2, f1)   |
|--------------------------|------------------|
| 1 Solvent                | CDC13            |
| 2 Experiment             | 2D-NOESY         |
| 3 Spectrometer Frequency | (400.13, 400.13) |
| 4 Nucleus                | (1H, 1H)         |

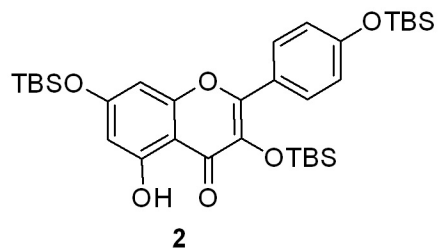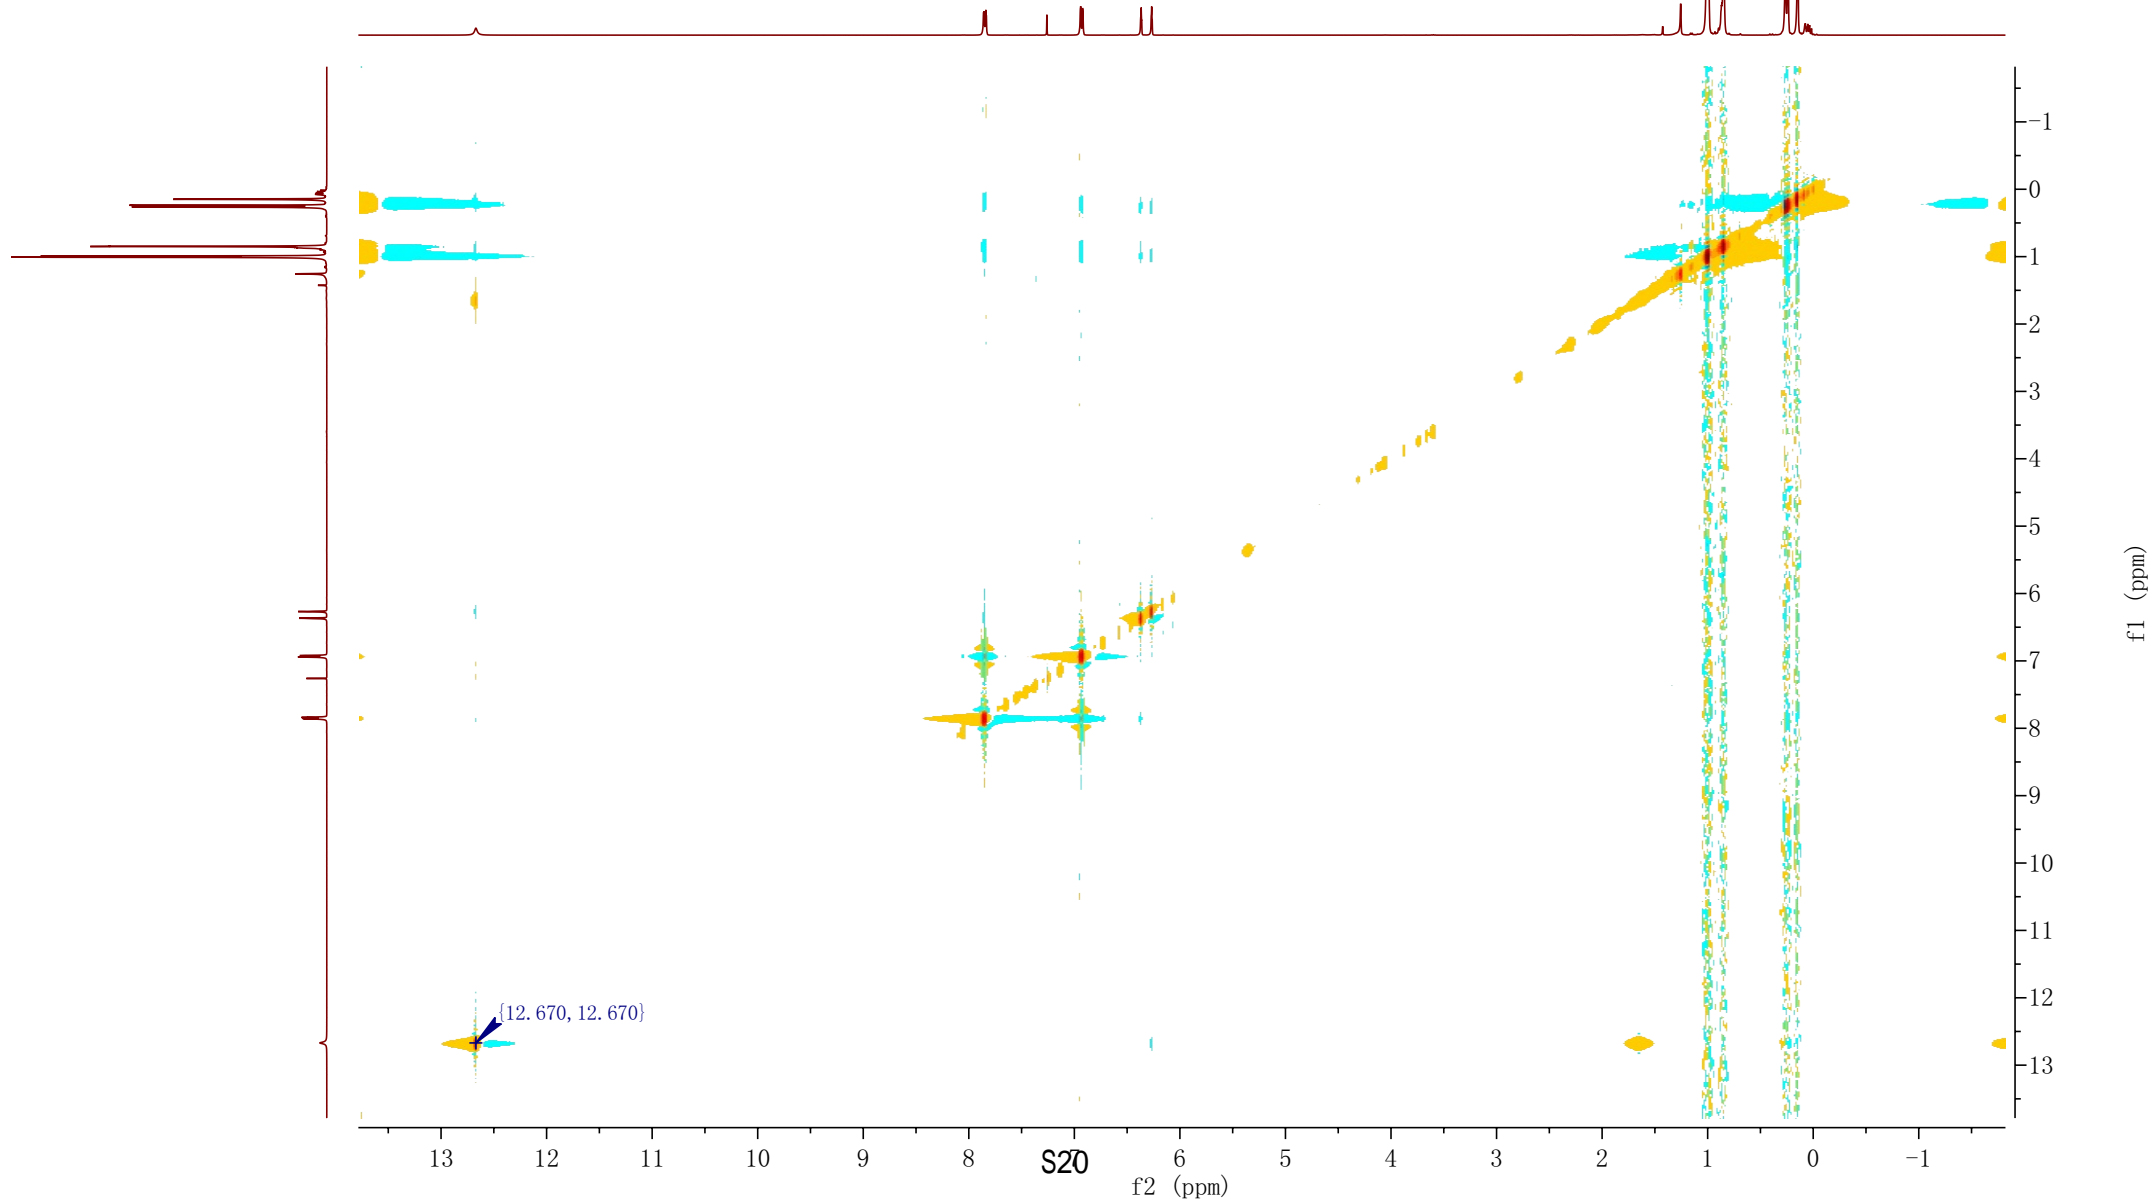

12.6798

7.4589  
7.4379  
7.3490  
7.2600  
7.2596  
6.9144  
6.8934  
6.3280  
6.2666  
6.2625

1.0060  
0.9969  
0.9918  
0.8354  
0.2632  
0.2347  
0.2070  
0.1207

| Parameter              | Value  |
|------------------------|--------|
| Solvent                | CDC13  |
| Experiment             | 1D     |
| Spectrometer Frequency | 400.13 |
| Nucleus                | 1H     |

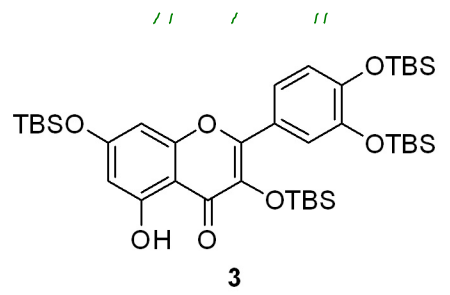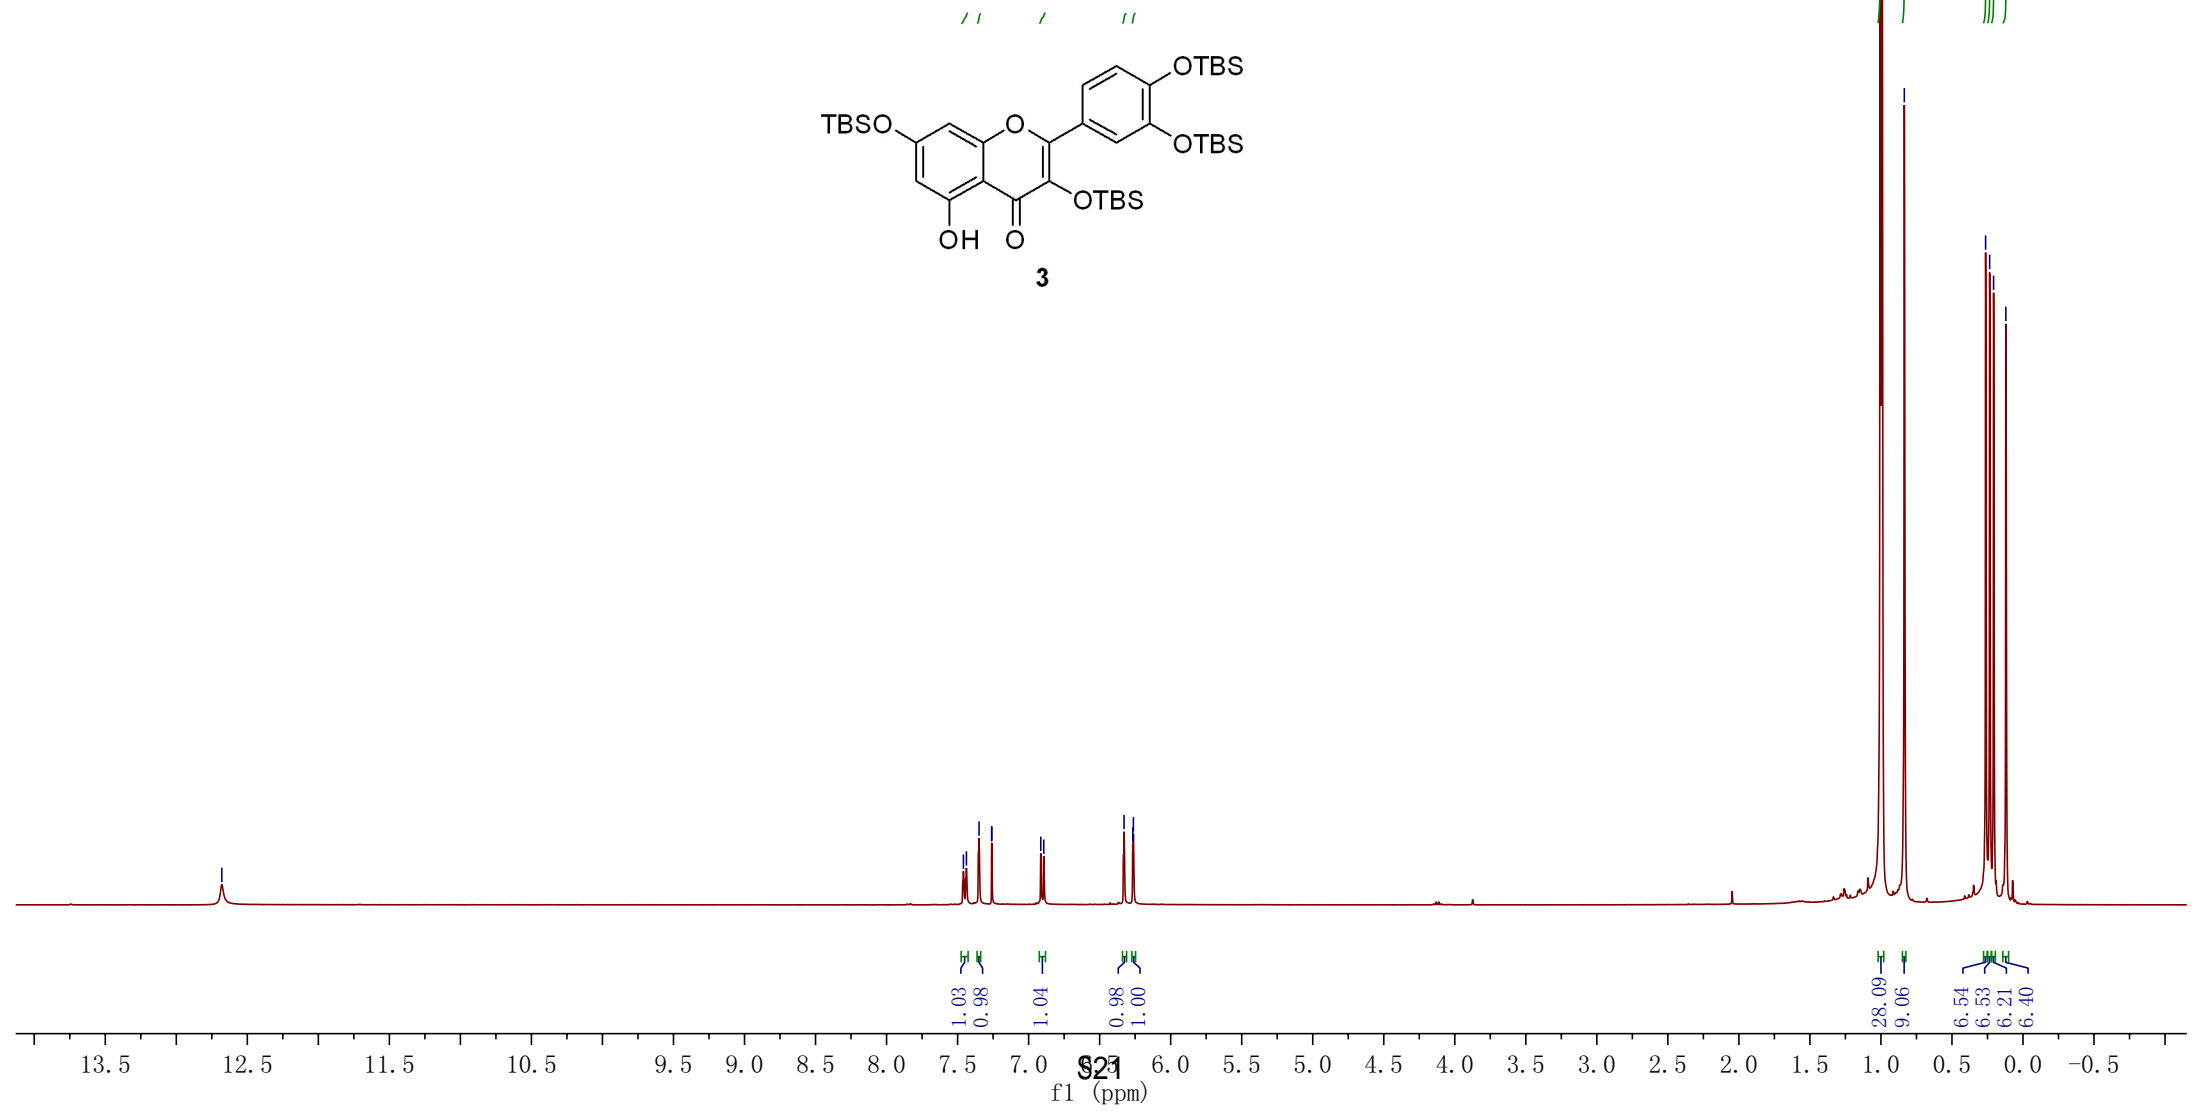

178.2293  
161.8045  
161.7582  
156.4417  
153.2640  
149.2328  
146.7606

135.6150  
124.4348  
123.1953  
121.7663  
120.8029  
106.1140  
102.9309  
98.1965

77.3176  
77.2034  
77.0000  
76.9999  
76.6827

25.9431  
25.9223  
25.6942  
25.5563  
18.5937  
18.4488  
18.2449

-0.0130  
-4.0464  
-4.0959  
-4.1695  
-4.3525

| Parameter              | Value  |
|------------------------|--------|
| Solvent                | CDC13  |
| Experiment             | 1D     |
| Spectrometer Frequency | 100.61 |
| Nucleus                | 13C    |

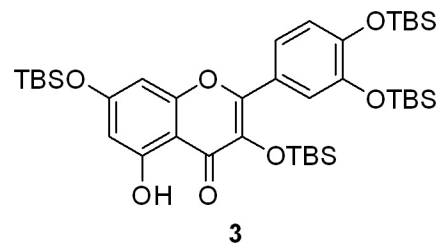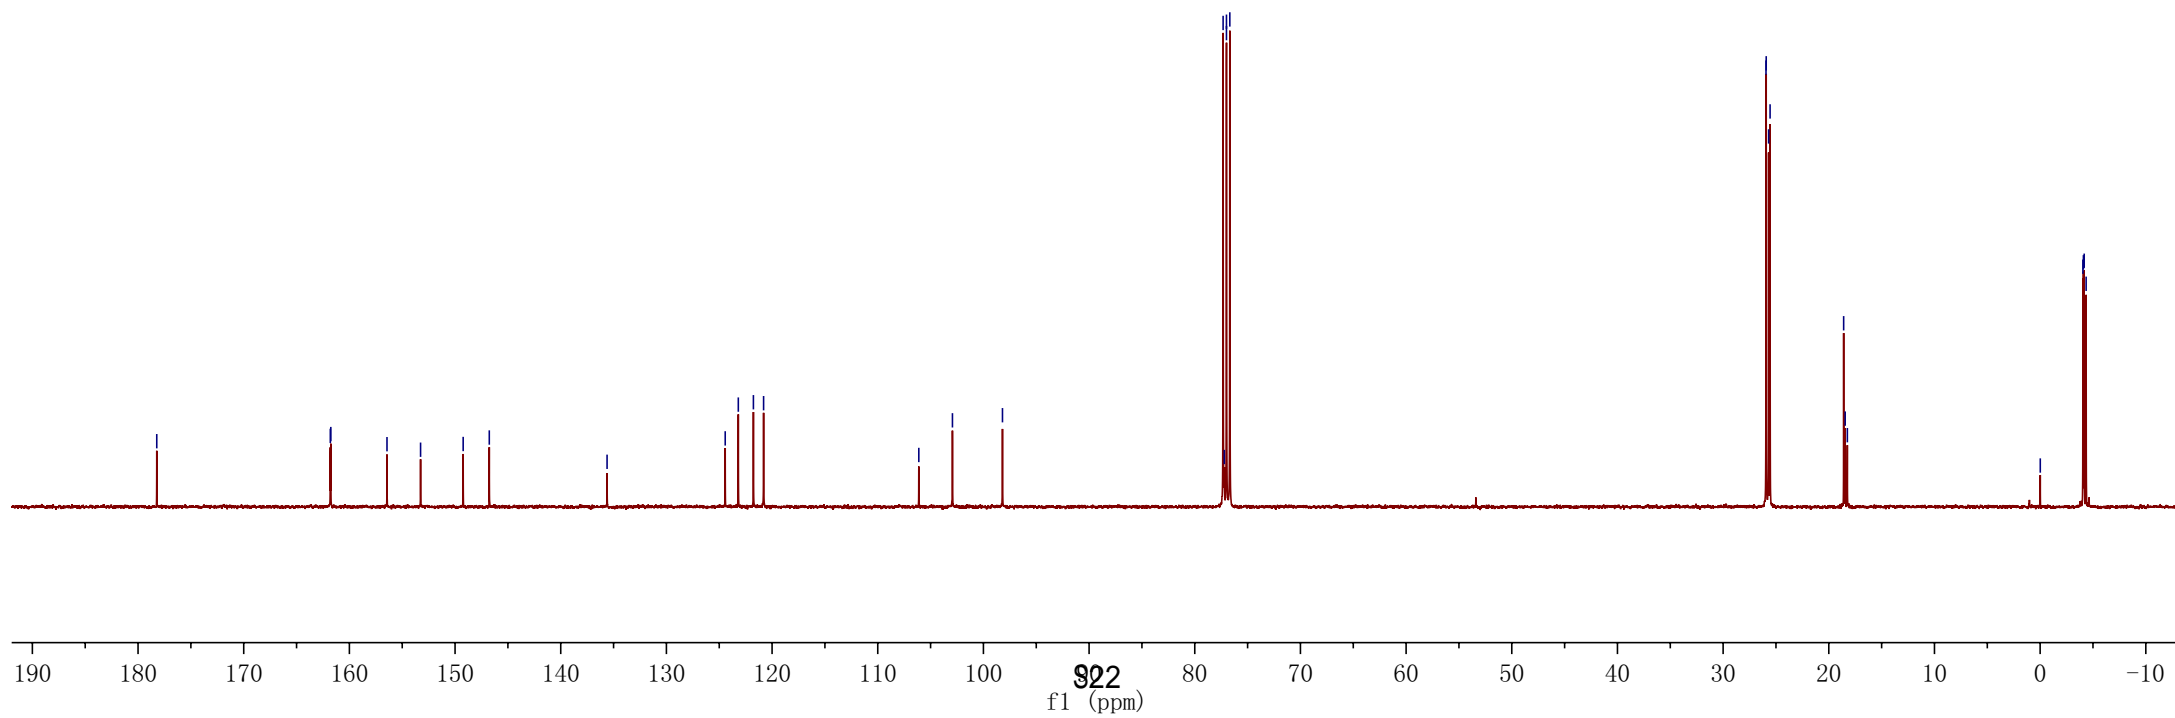

12.5834

| Parameter              | Value          |
|------------------------|----------------|
| Solvent                | CDC13          |
| Experiment             | 1D             |
| Spectrometer Frequency | 400.13         |
| Nucleus                | <sup>1</sup> H |

7.8357  
7.8132  
7.2897  
7.2602  
7.2600  
7.2446  
7.1216  
7.1134  
6.8662  
6.8493  
6.8269  
6.2772  
6.2718  
4.9684  
4.9458  
4.9002

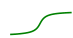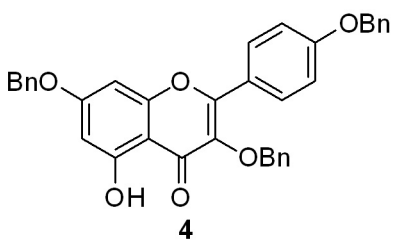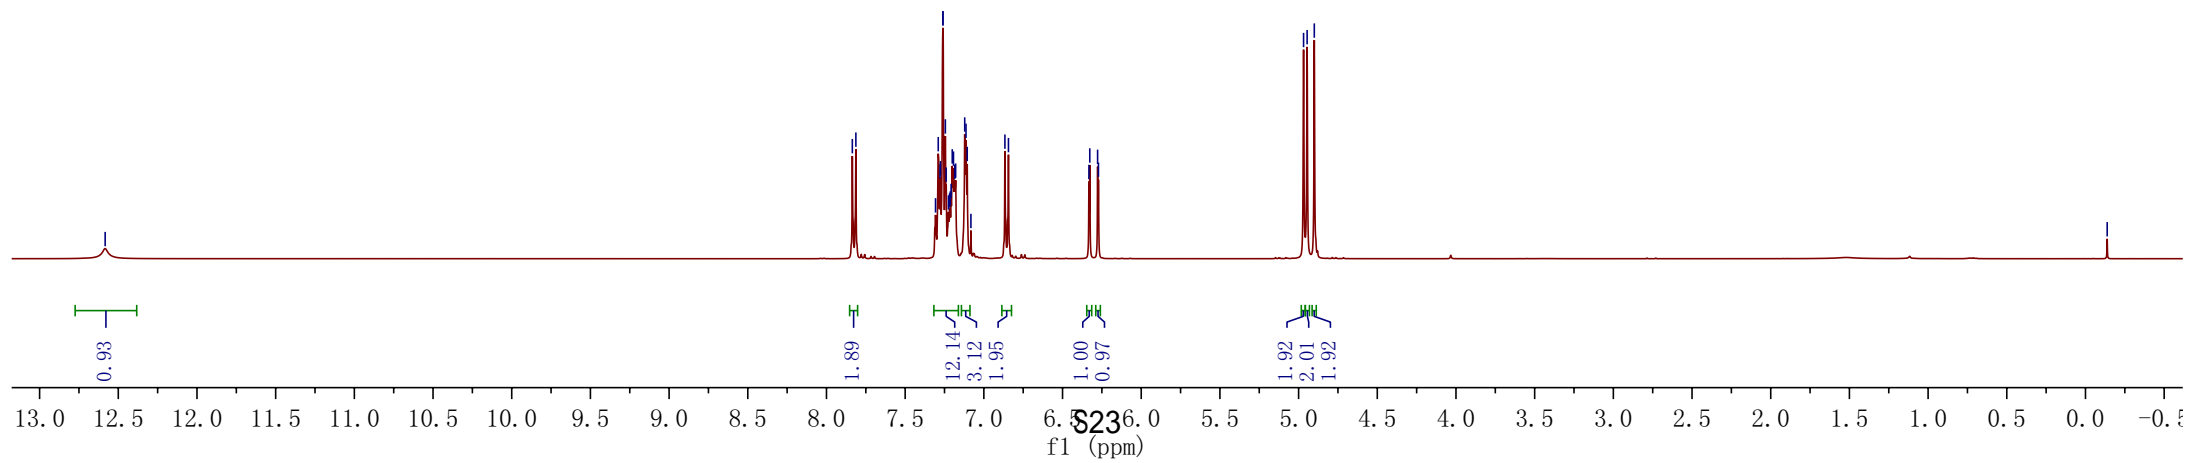

0.1380

— 178.7165

— 164.3579

— 161.9884

— 160.6761

— 156.6516

— 156.5730

— 137.2647

— 136.3981

— 136.2768

— 135.7474

— 128.6602

— 128.6241

— 128.2158

— 127.3989

— 123.0189

— 114.6156

— 106.1129

— 98.5190

— 92.9603

— 77.3170

— 77.0000

— 76.9997

— 76.6815

— 74.1755

— 70.3446

— 70.0101

| Parameter              | Value           |
|------------------------|-----------------|
| Solvent                | CDCl3           |
| Experiment             | 1D              |
| Spectrometer Frequency | 100.61          |
| Nucleus                | <sup>13</sup> C |

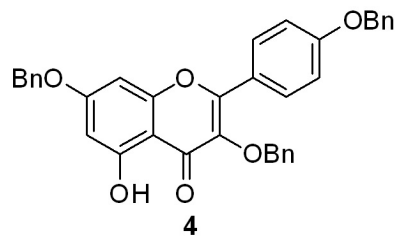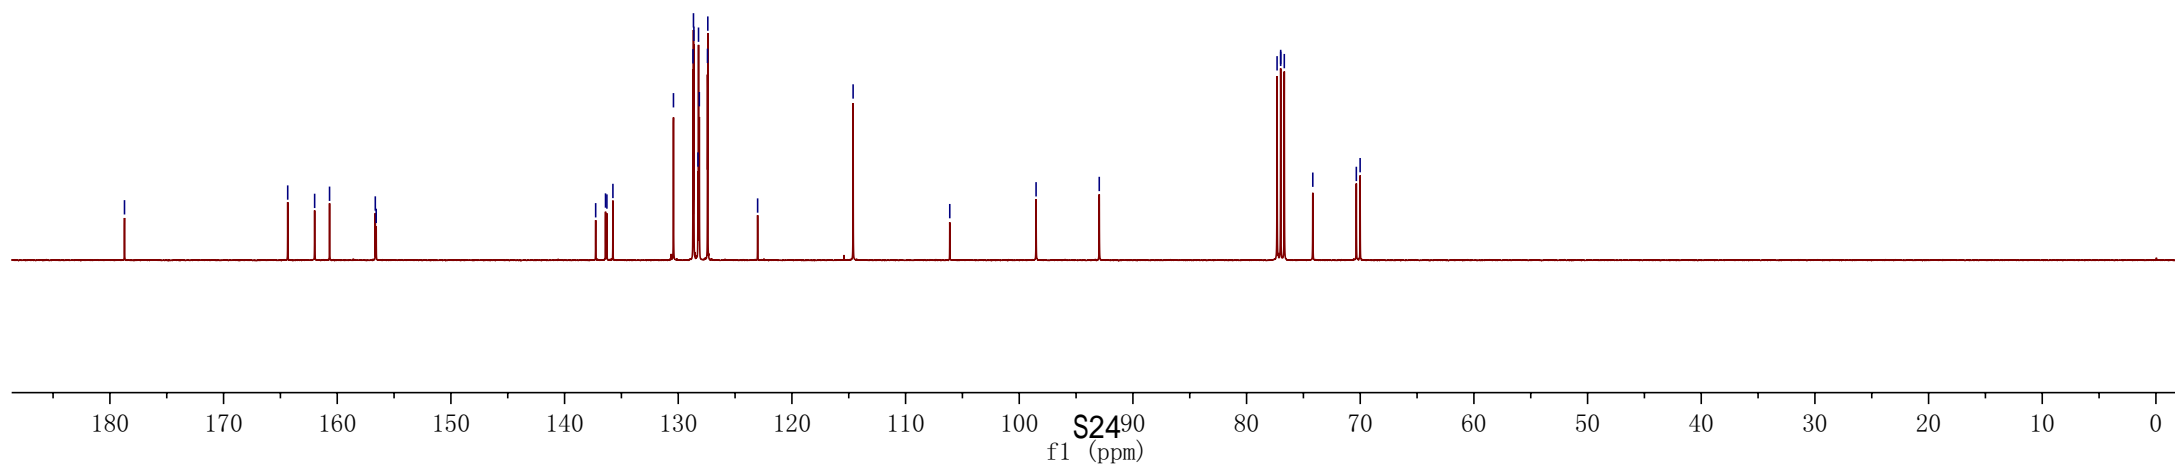



130.4217  
128.7039  
128.6639  
128.6288  
128.2691  
128.2202  
128.1516  
127.4318  
127.4051

114.6087

98.5190  
98.5186

92.9542

74.1730

70.3404  
70.0043

| Parameter              | Value           |
|------------------------|-----------------|
| Solvent                | CDC13           |
| Experiment             | 1D-DEPT-135     |
| Spectrometer Frequency | 100.61          |
| Nucleus                | <sup>13</sup> C |

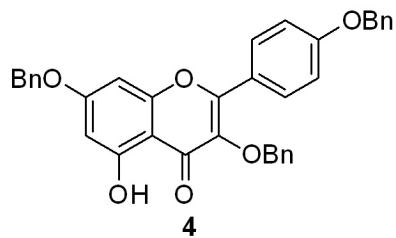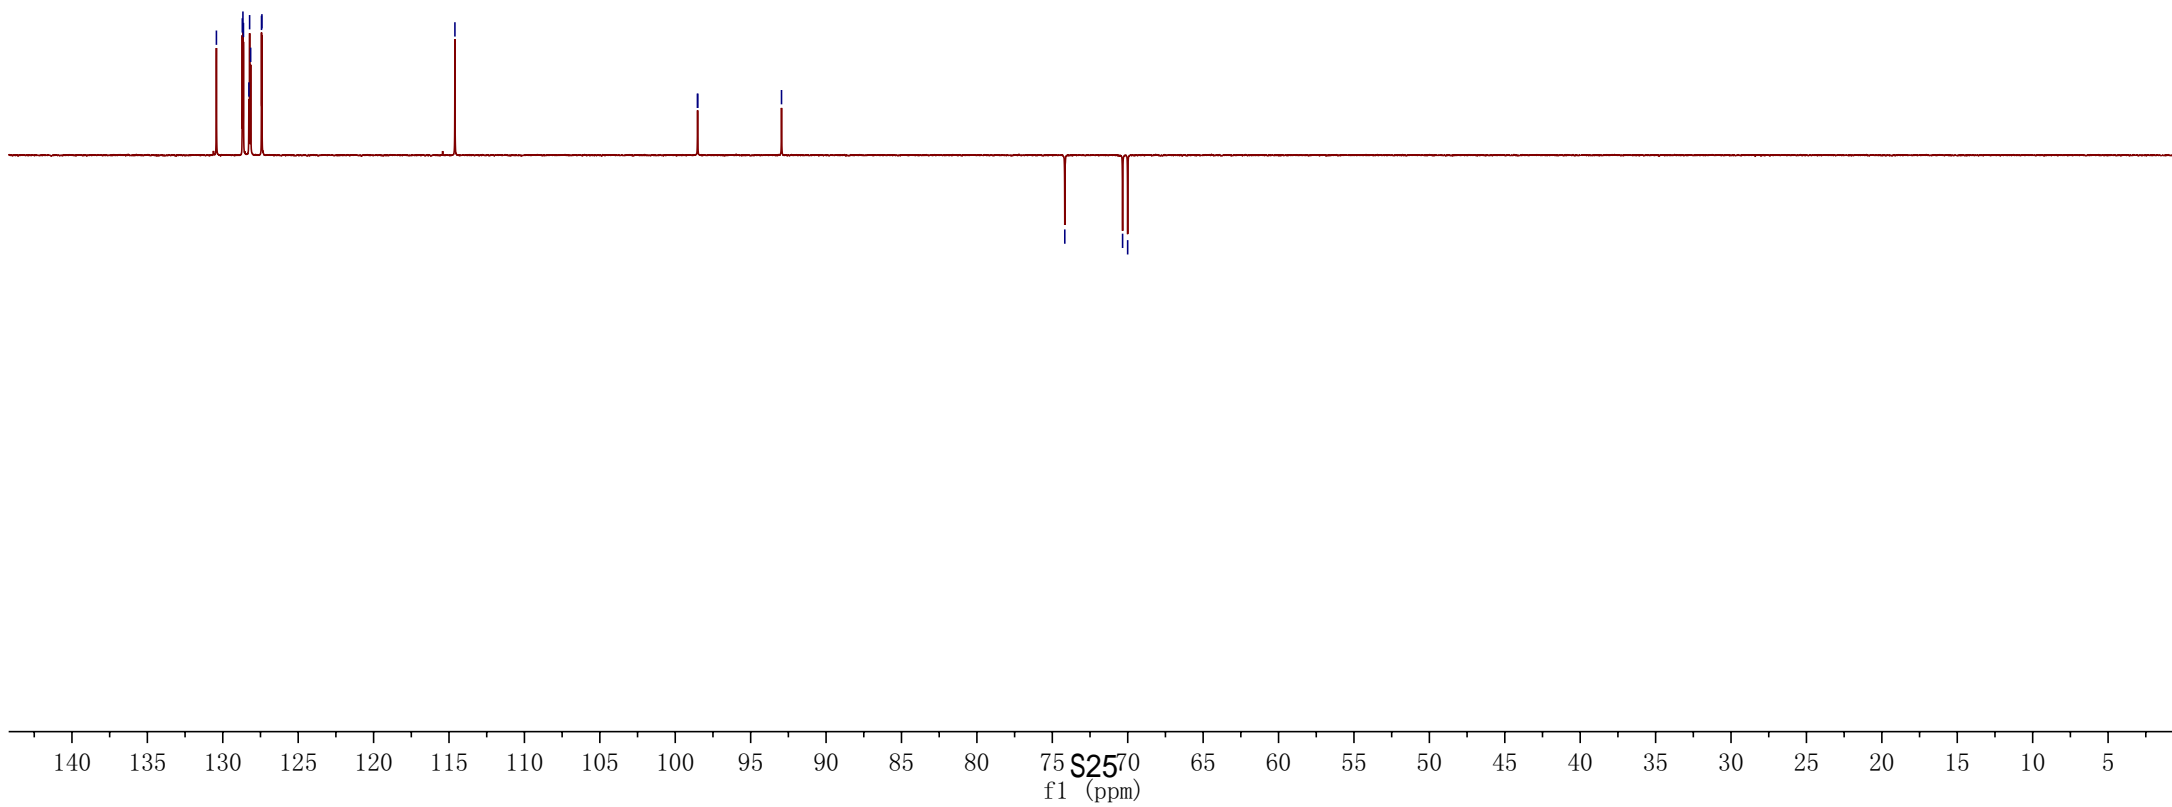

| Parameter                | Value (f2, f1)   |
|--------------------------|------------------|
| 1 Solvent                | CDCl3            |
| 2 Experiment             | 2D-COSY          |
| 3 Spectrometer Frequency | (400.13, 400.13) |
| 4 Nucleus                | (1H, 1H)         |

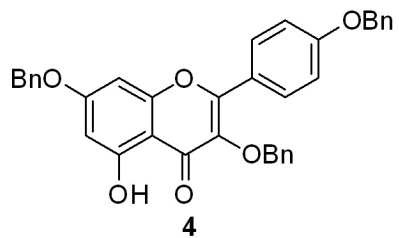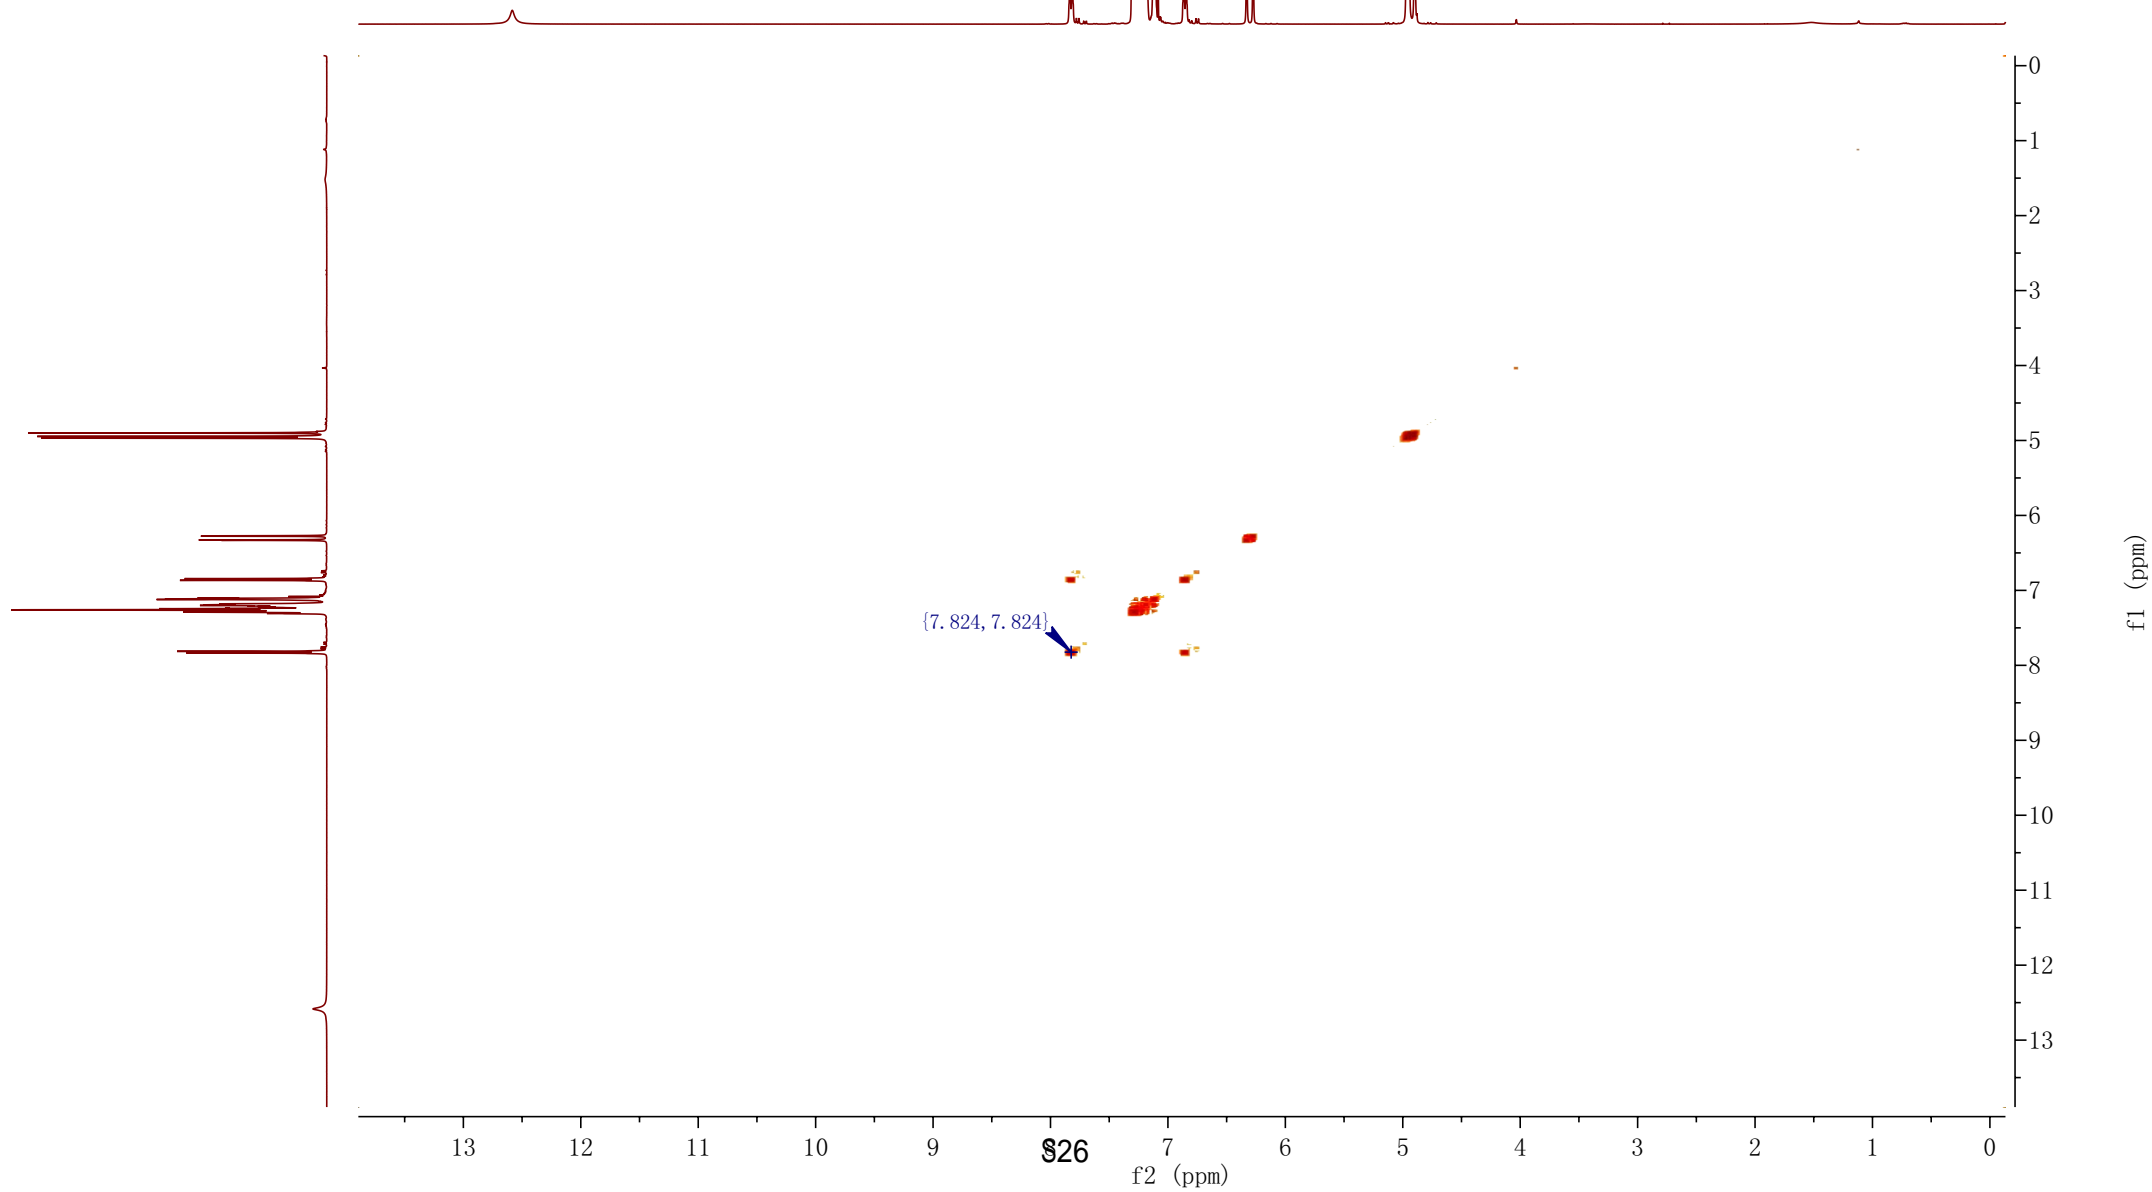

| Parameter                | Value (f2, f1)   |
|--------------------------|------------------|
| 1 Solvent                | CDC13            |
| 2 Experiment             | 2D-HMBC          |
| 3 Spectrometer Frequency | (400.13, 100.61) |
| 4 Nucleus                | (1H, 13C)        |

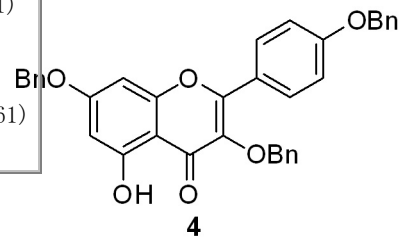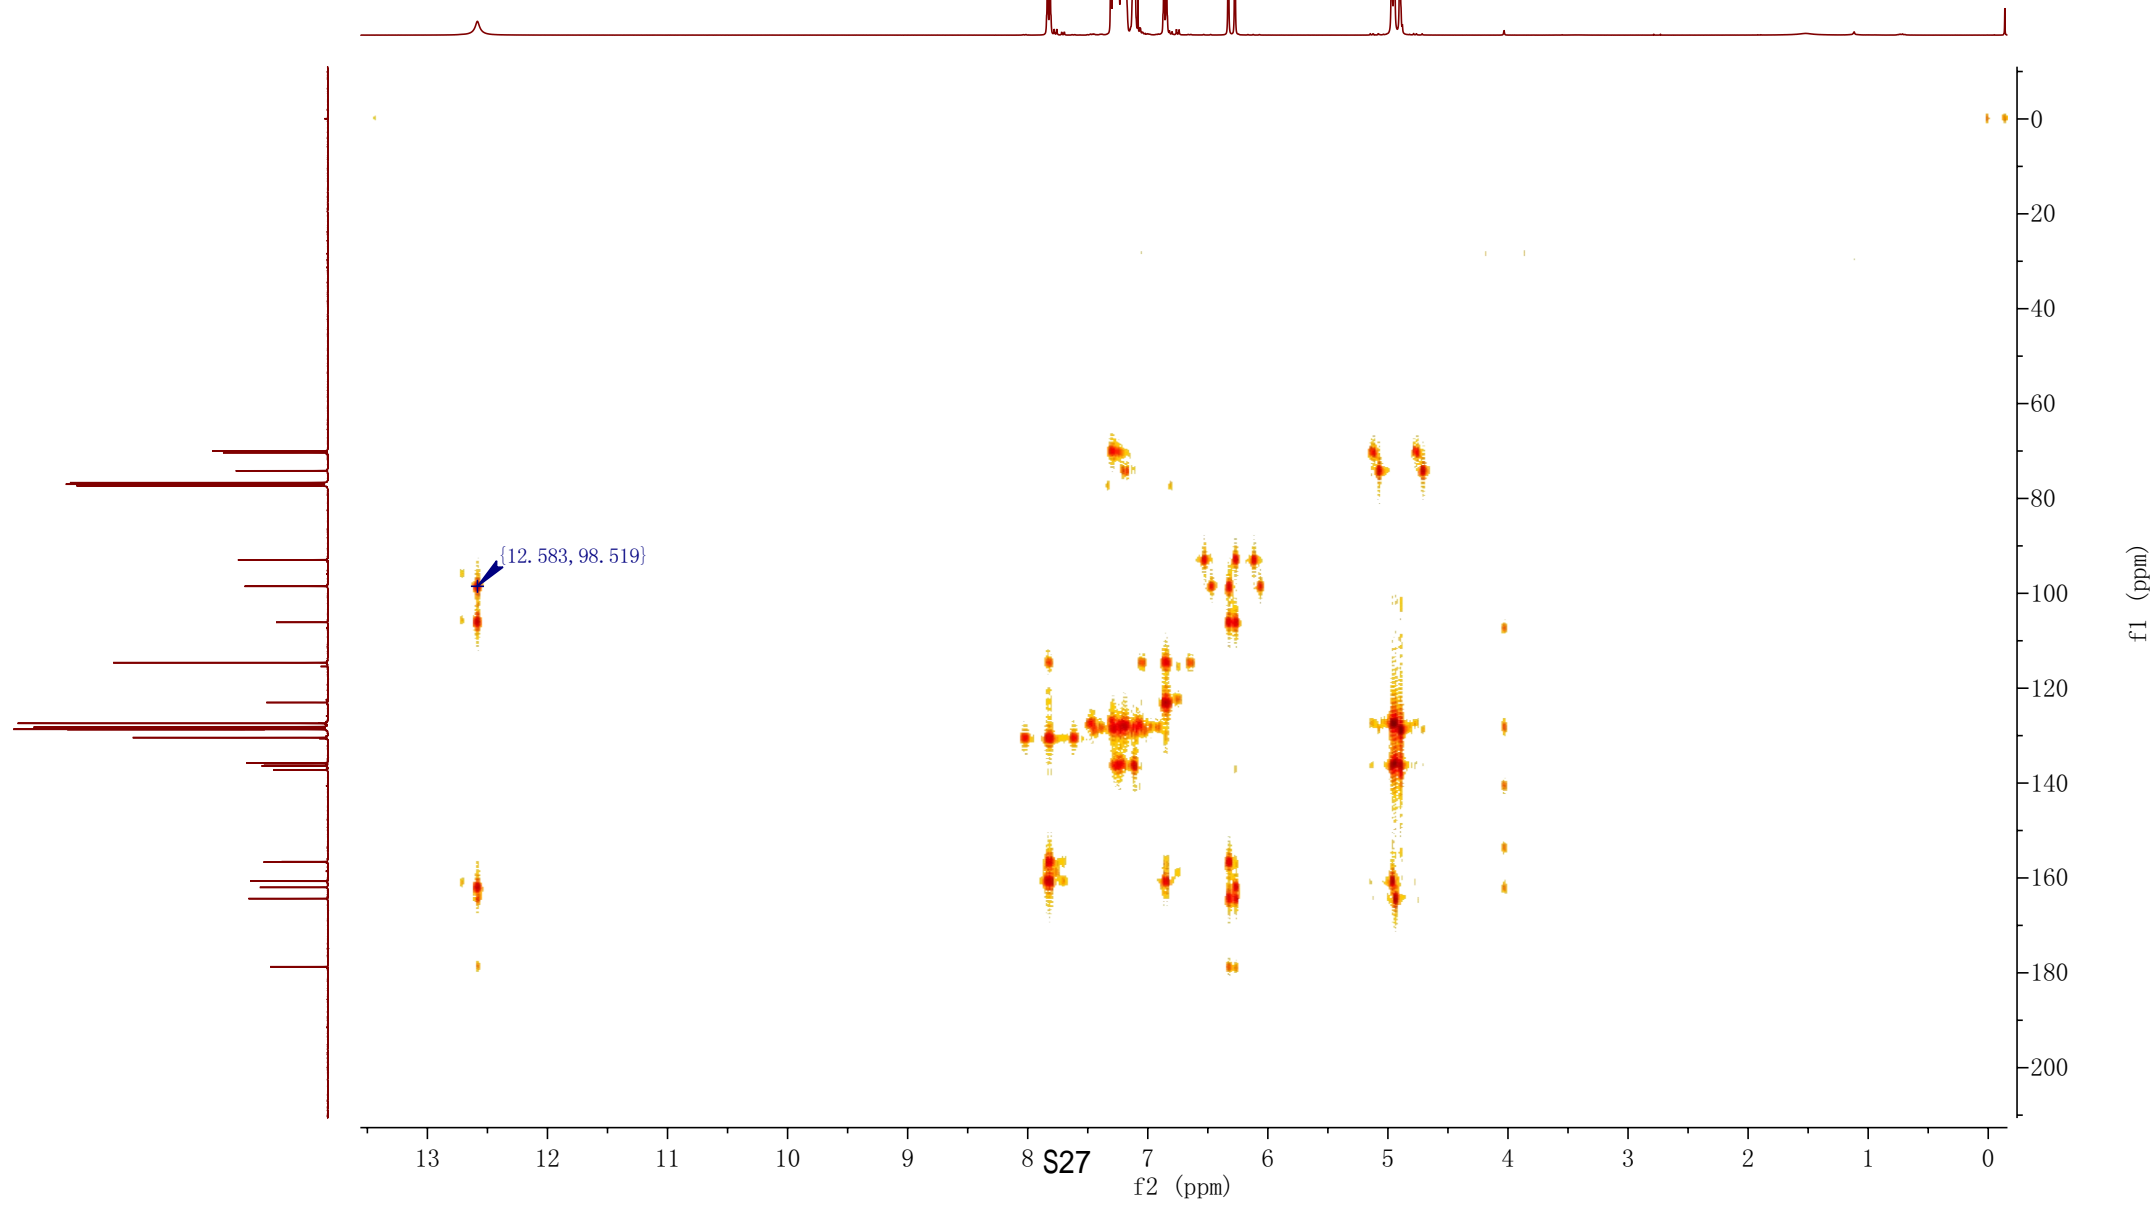

12.1696

| Parameter              | Value          |
|------------------------|----------------|
| Solvent                | CDCl3          |
| Experiment             | 1D             |
| Spectrometer Frequency | 400.13         |
| Nucleus                | <sup>1</sup> H |

7.8775  
7.8726  
7.8602  
7.8554  
7.2645  
7.2600  
7.2596  
7.2425  
6.8384  
6.8334  
6.5820  
6.5770

2.6302  
2.6123  
2.5989  
2.5938  
2.5805  
2.5752  
2.5617  
1.7769  
1.7635  
1.7589  
1.7449  
1.4050  
1.3960  
1.3872  
0.9577  
0.9539  
0.9489  
0.9404  
0.9364  
0.9213  
0.9031  
0.8854  
0.8630

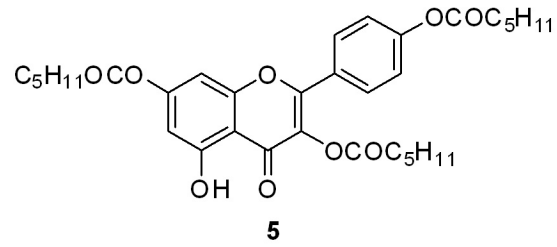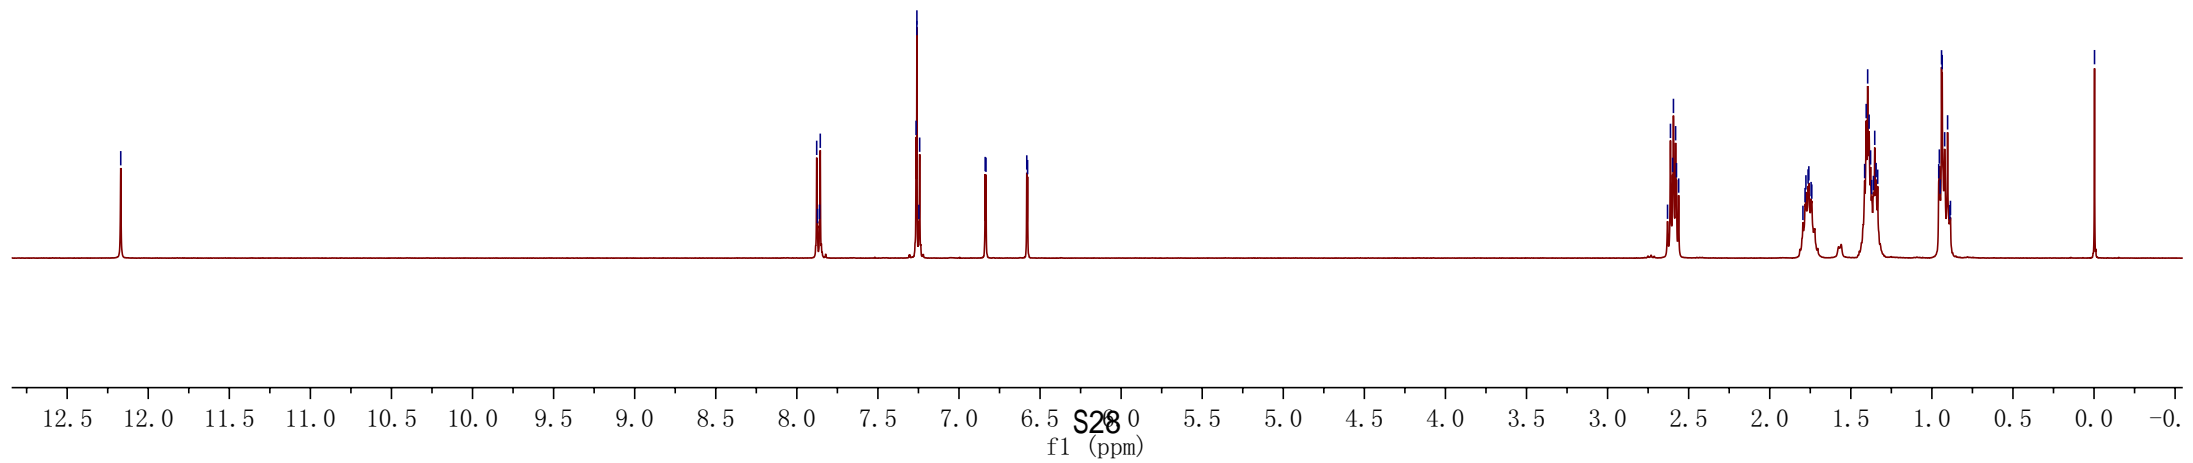

176.2979  
171.6853  
171.1172  
170.6086  
  
161.6678  
156.4841  
156.3663  
155.9748  
153.2083

131.9675  
129.7215  
126.6709  
  
122.0326

108.7036  
105.3739  
101.0953

77.3167  
77.0000  
76.9995  
76.6813

34.3225  
33.7486  
31.1887  
31.1449  
31.0974  
24.4826  
24.4188  
24.3587  
22.2650  
22.2508  
22.2250  
13.8625  
13.8298

| Parameter              | Value  |
|------------------------|--------|
| Solvent                | CDC13  |
| Experiment             | 1D     |
| Spectrometer Frequency | 100.61 |
| Nucleus                | 13C    |

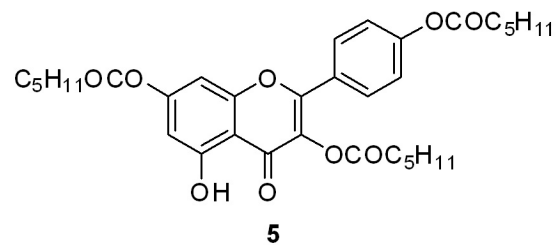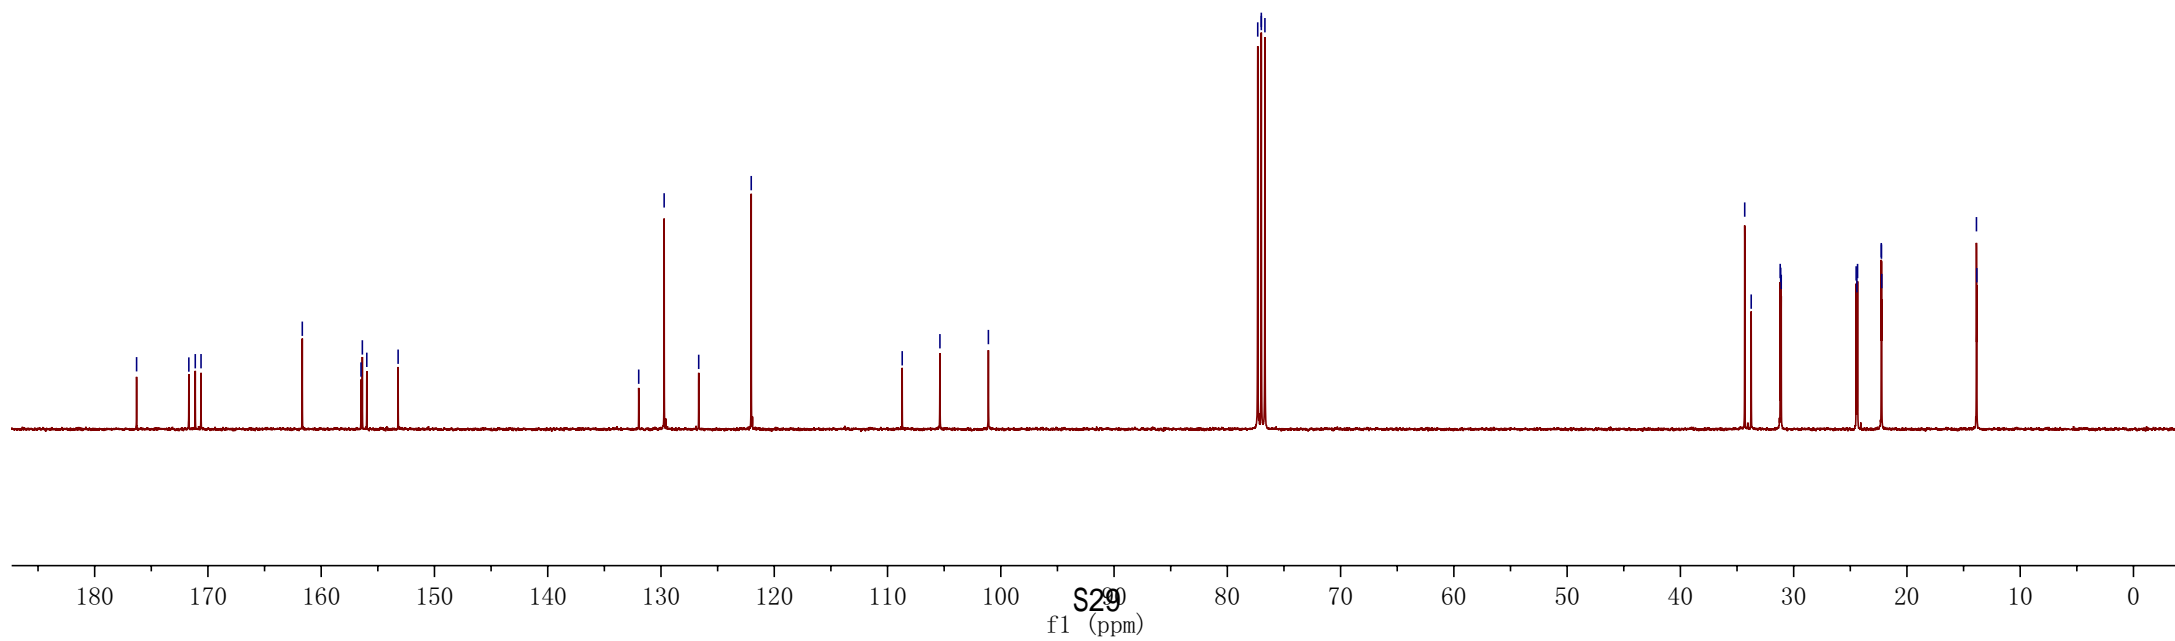

Parameter Value  
Solvent CDC13  
Experiment 1D-DEPT-135  
Spectrometer Frequency 100.61  
Nucleus 13C

34.312  
33.739  
31.179  
31.135  
31.089  
24.475  
24.411  
24.350  
22.263  
22.245  
22.221  
13.862  
13.829

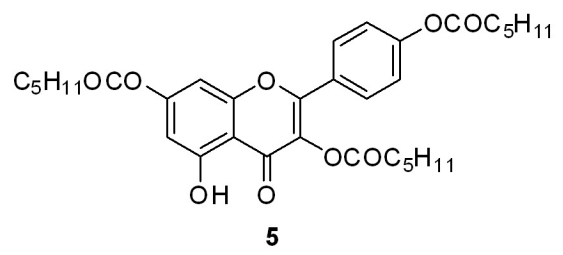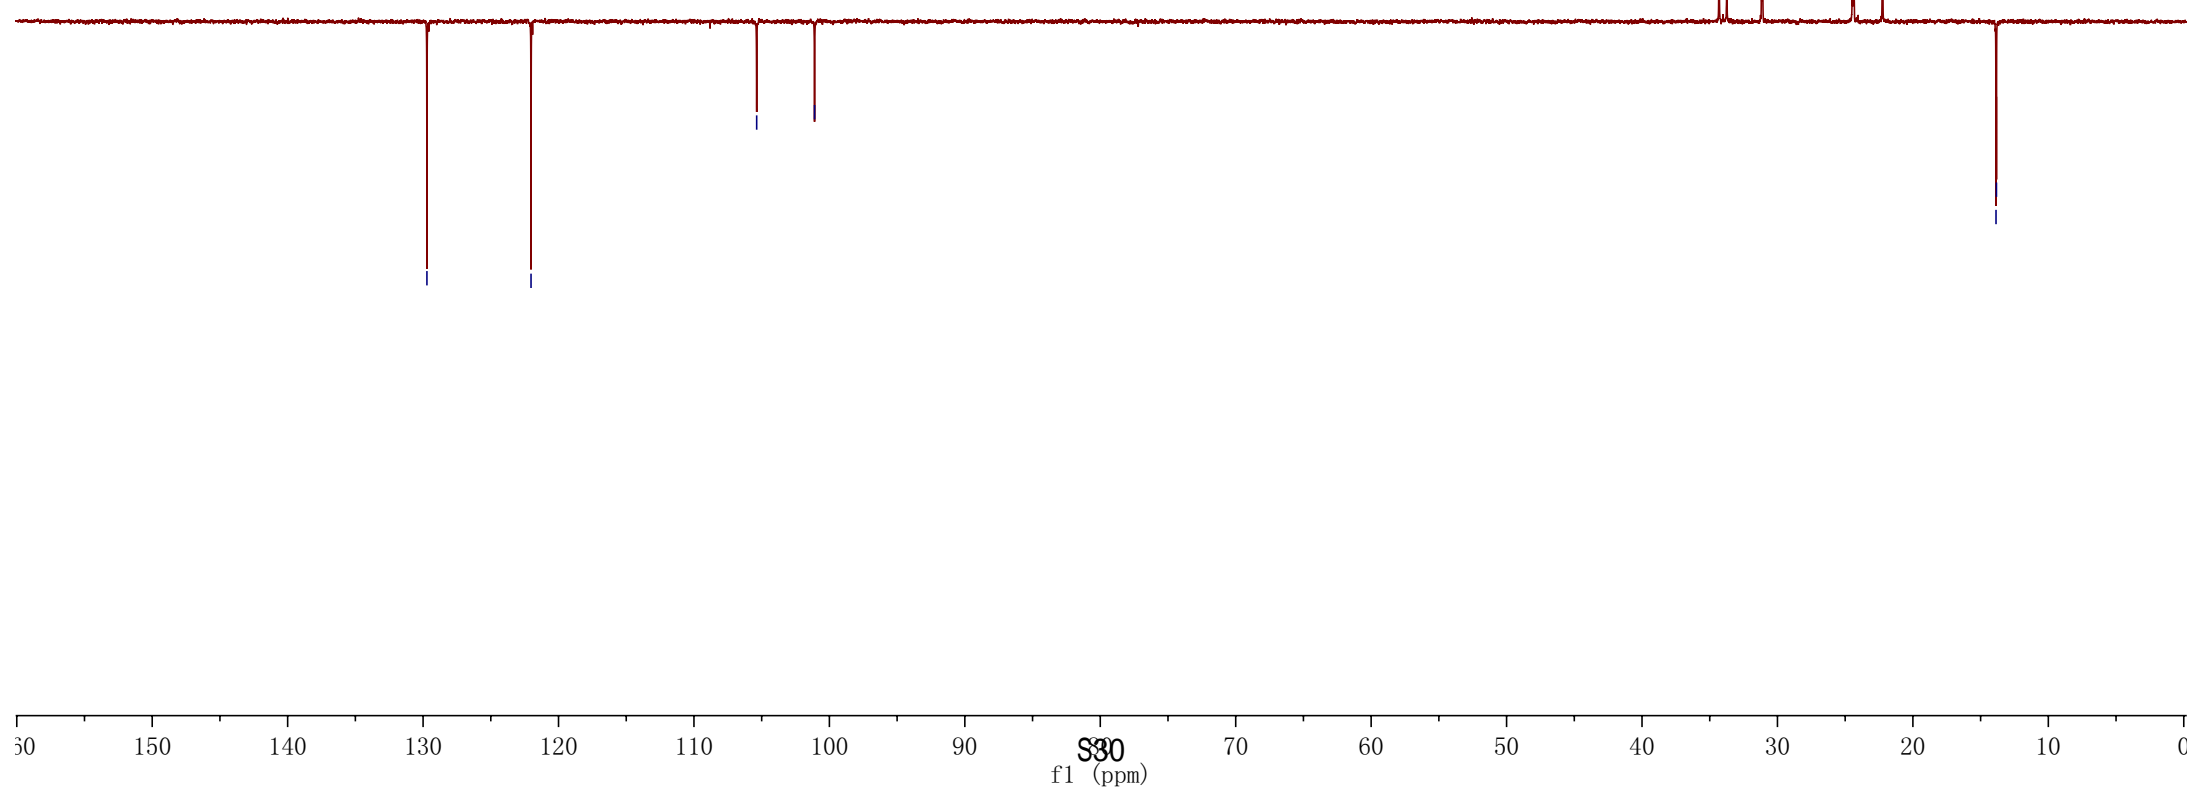

| Parameter                | Value (f2, f1)   |
|--------------------------|------------------|
| 1 Solvent                | CDC13            |
| 2 Experiment             | 2D-COSY          |
| 3 Spectrometer Frequency | (400.13, 400.13) |
| 4 Nucleus                | (1H, 1H)         |

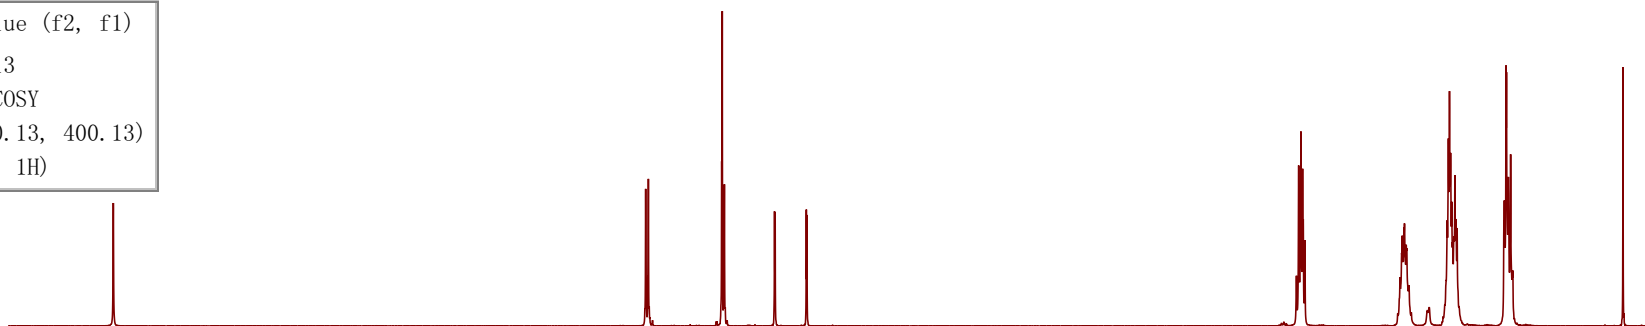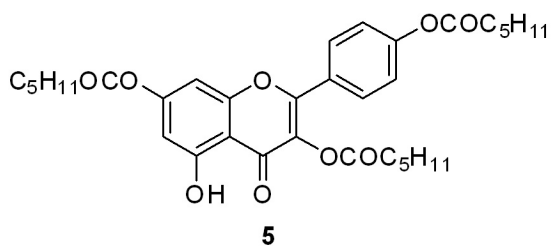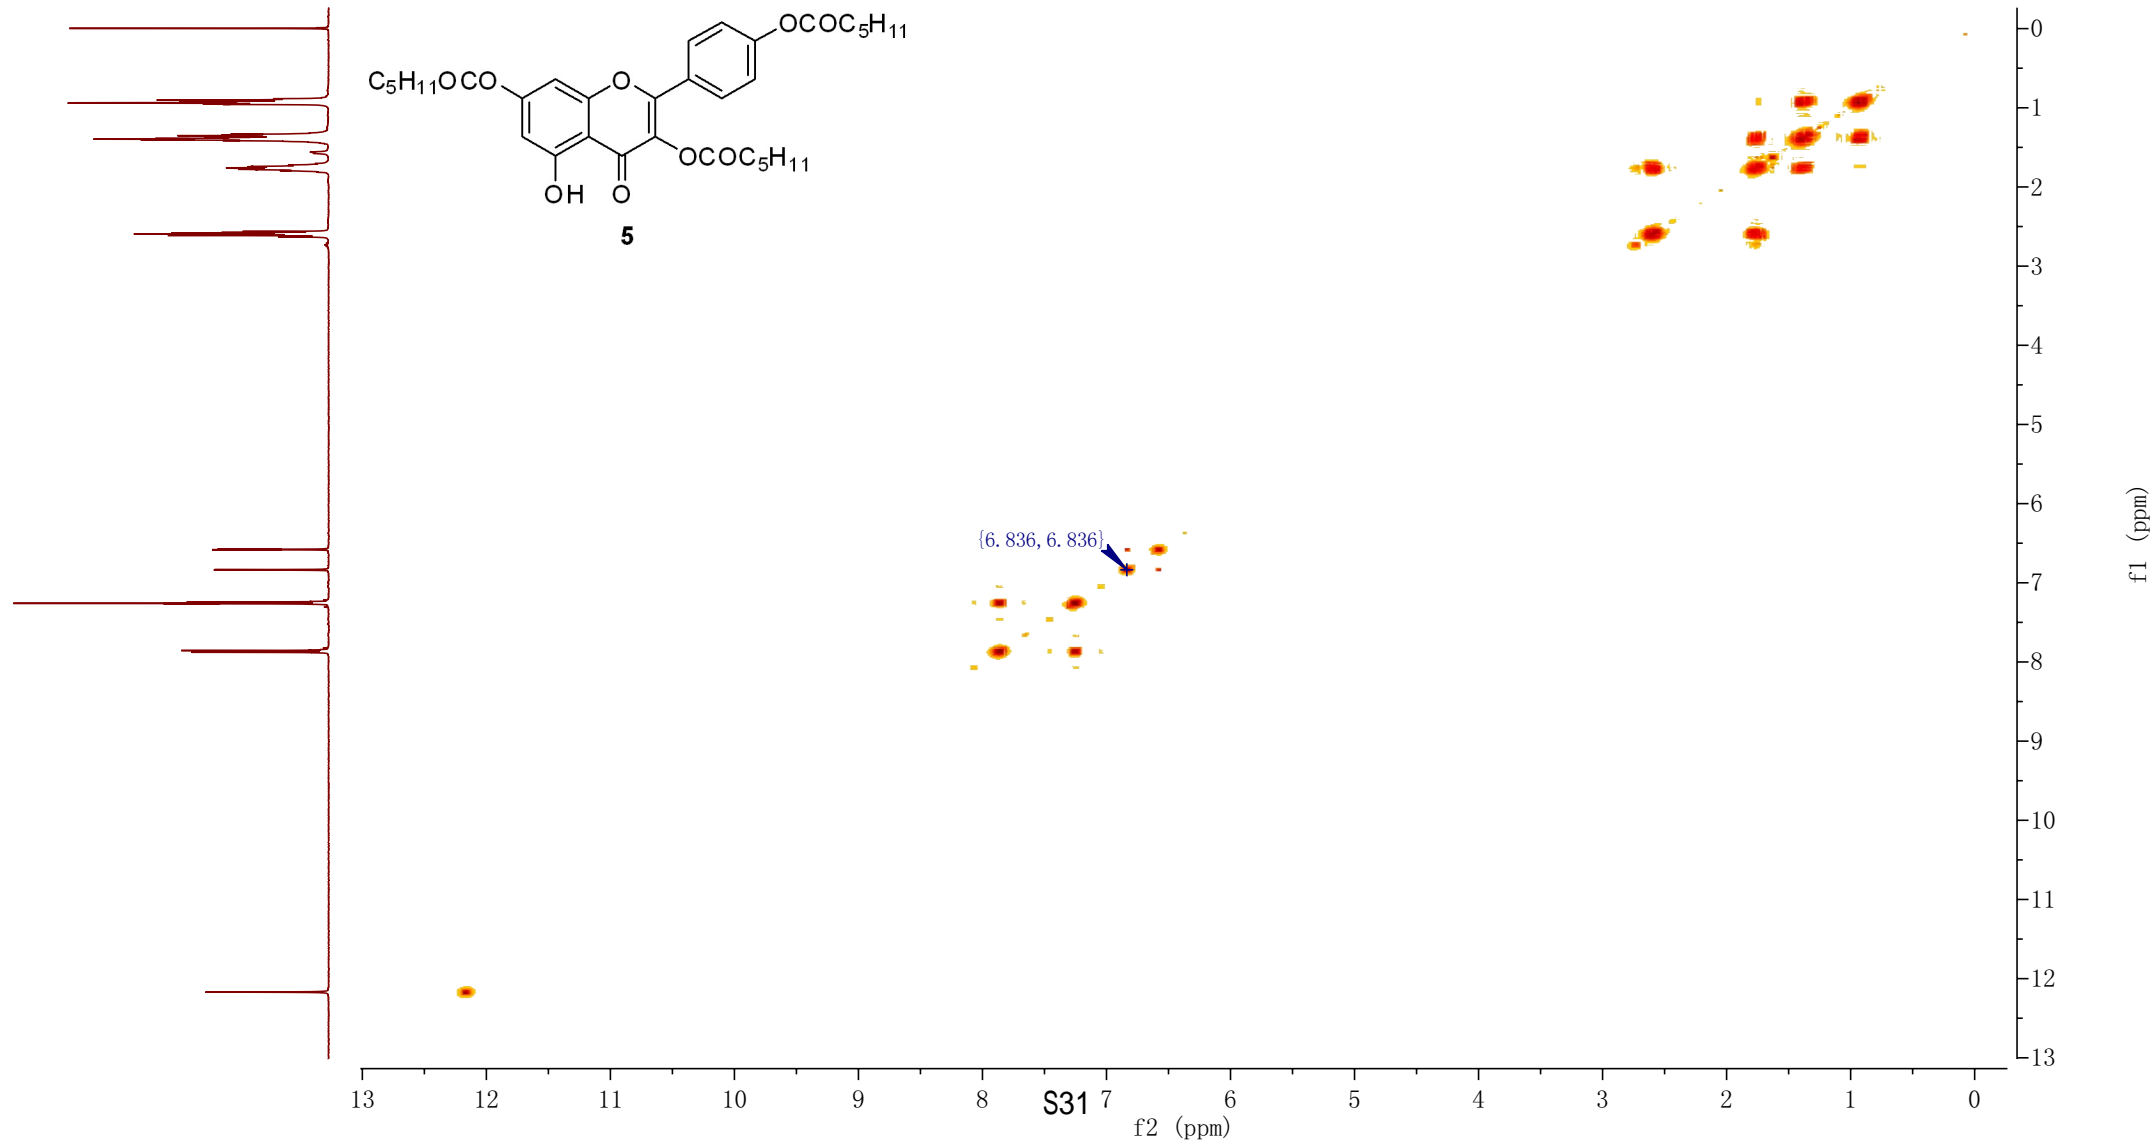

| Parameter                | Value (f2, f1)                     |
|--------------------------|------------------------------------|
| 1 Solvent                | CDC13                              |
| 2 Experiment             | 2D-HMBC                            |
| 3 Spectrometer Frequency | (400.13, 100.61)                   |
| 4 Nucleus                | ( <sup>1</sup> H, <sup>13</sup> C) |

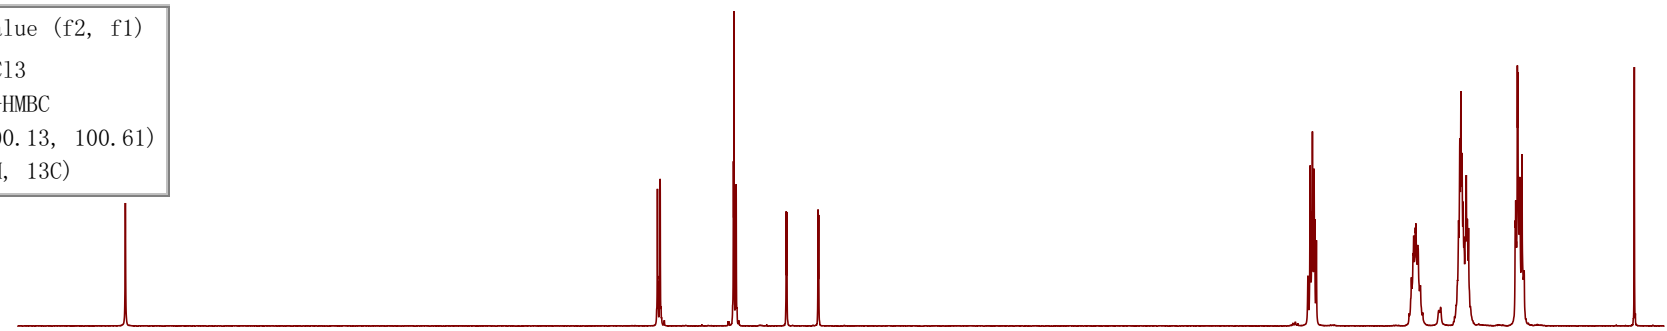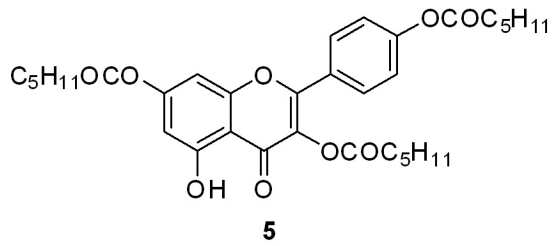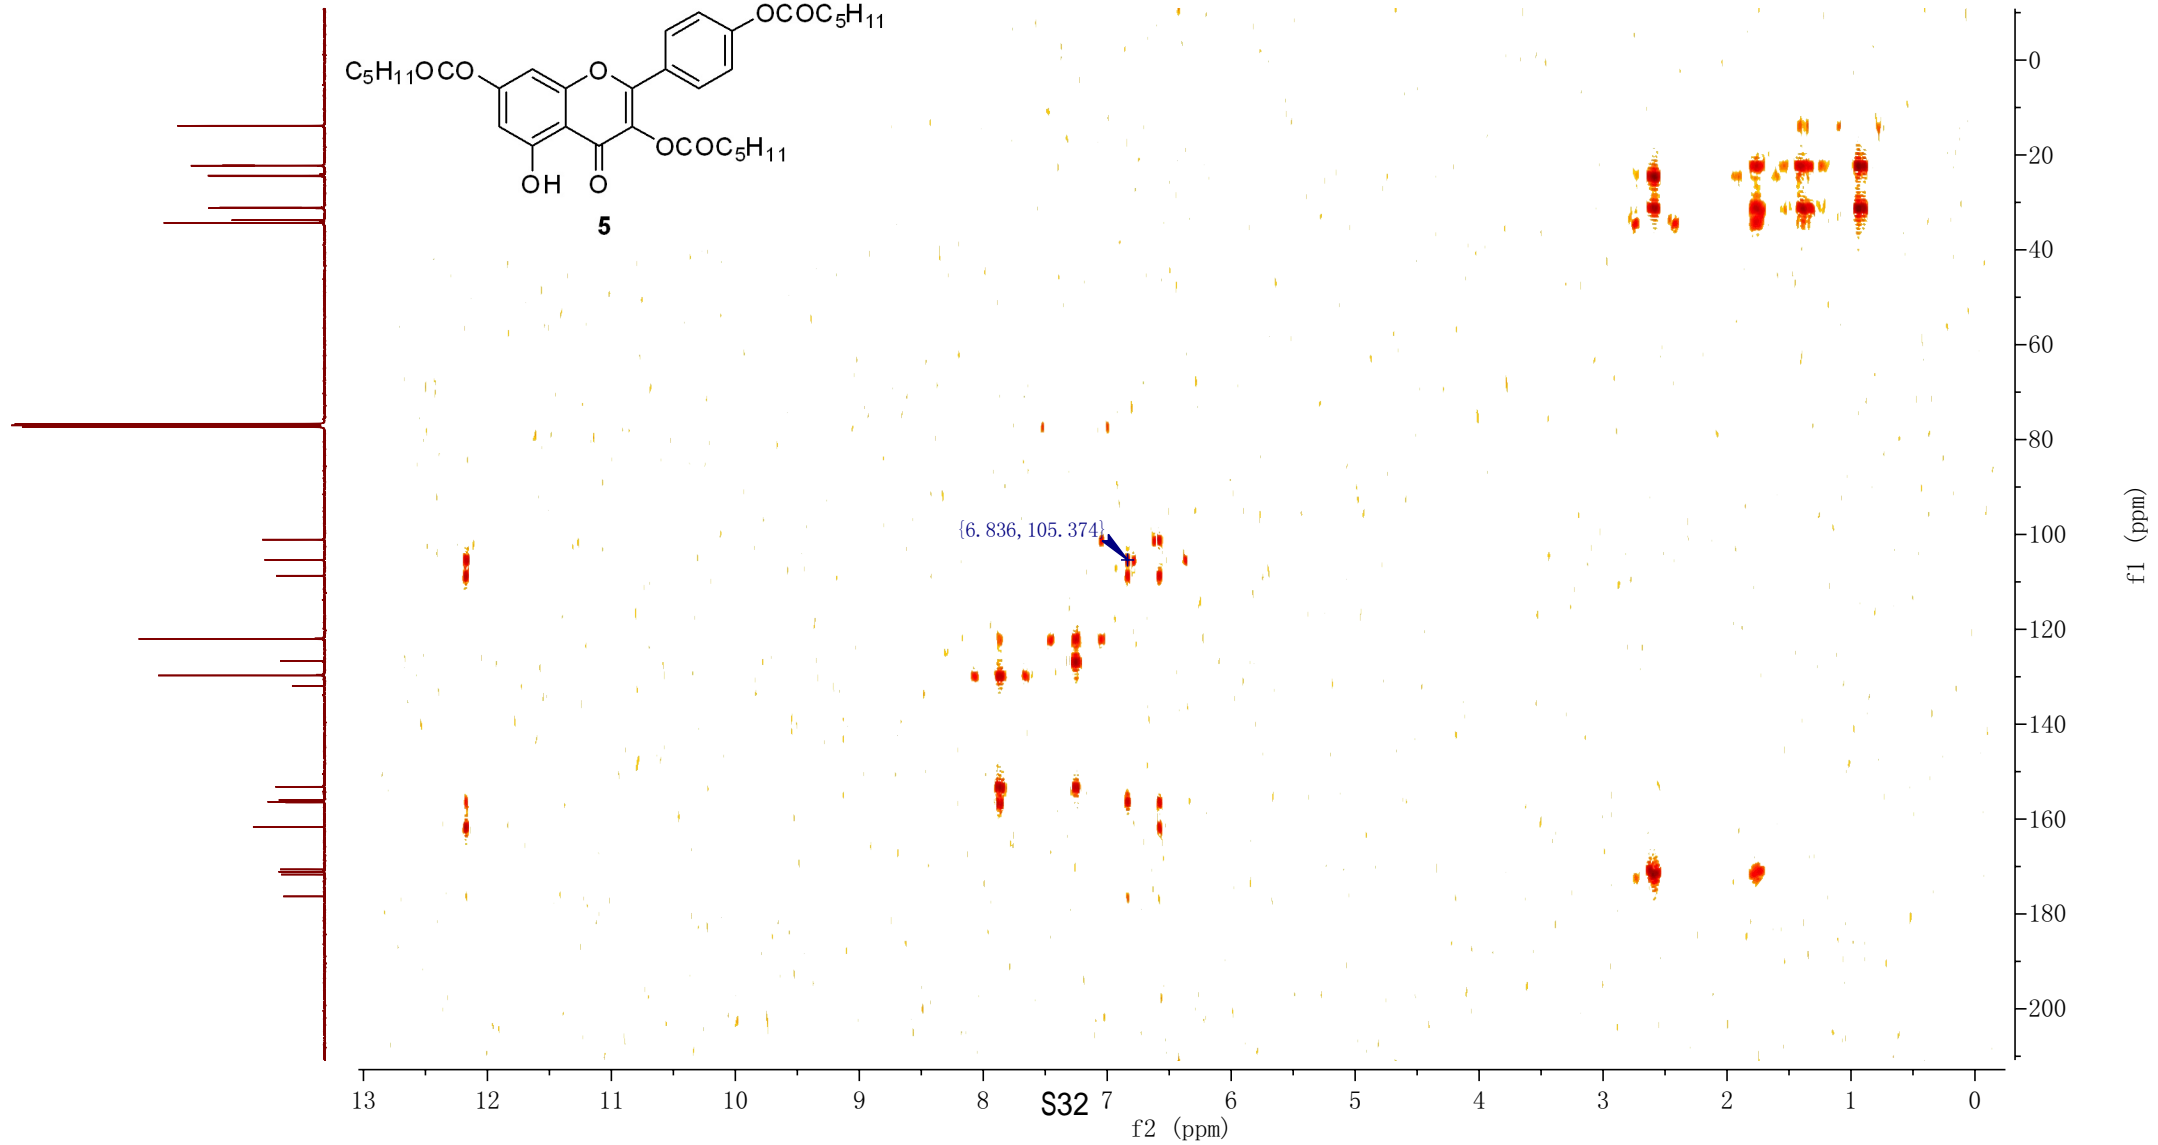



8.0702  
8.0518  
7.9322  
7.9246  
7.9145  
7.9116  
7.9062  
7.8895  
7.8710  
7.8192  
7.7976  
7.5240  
7.2808  
7.2600  
6.9141  
6.8924  
6.6074  
6.6021  
6.0432  
6.0201  
5.9970  
5.9751  
5.9518  
5.8590  
5.8355  
5.8124  
5.7080  
5.6907

4.6113  
4.6036  
4.5807  
4.5737  
4.5004  
4.4889  
4.4703  
4.4585  
4.2260  
4.2138  
4.2024

1.0009  
0.9481  
0.7502

0.2264  
0.2196  
0.2119  
0.0128  
0.0023

Parameter Value  
Solvent CDCl3  
Experiment 1D  
Spectrometer Frequency 400.13  
Nucleus 1H

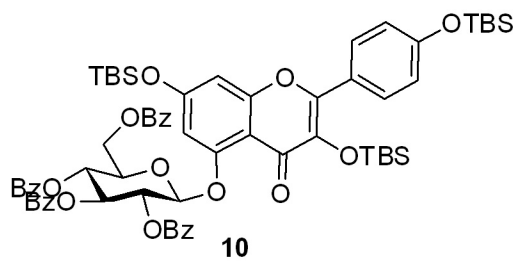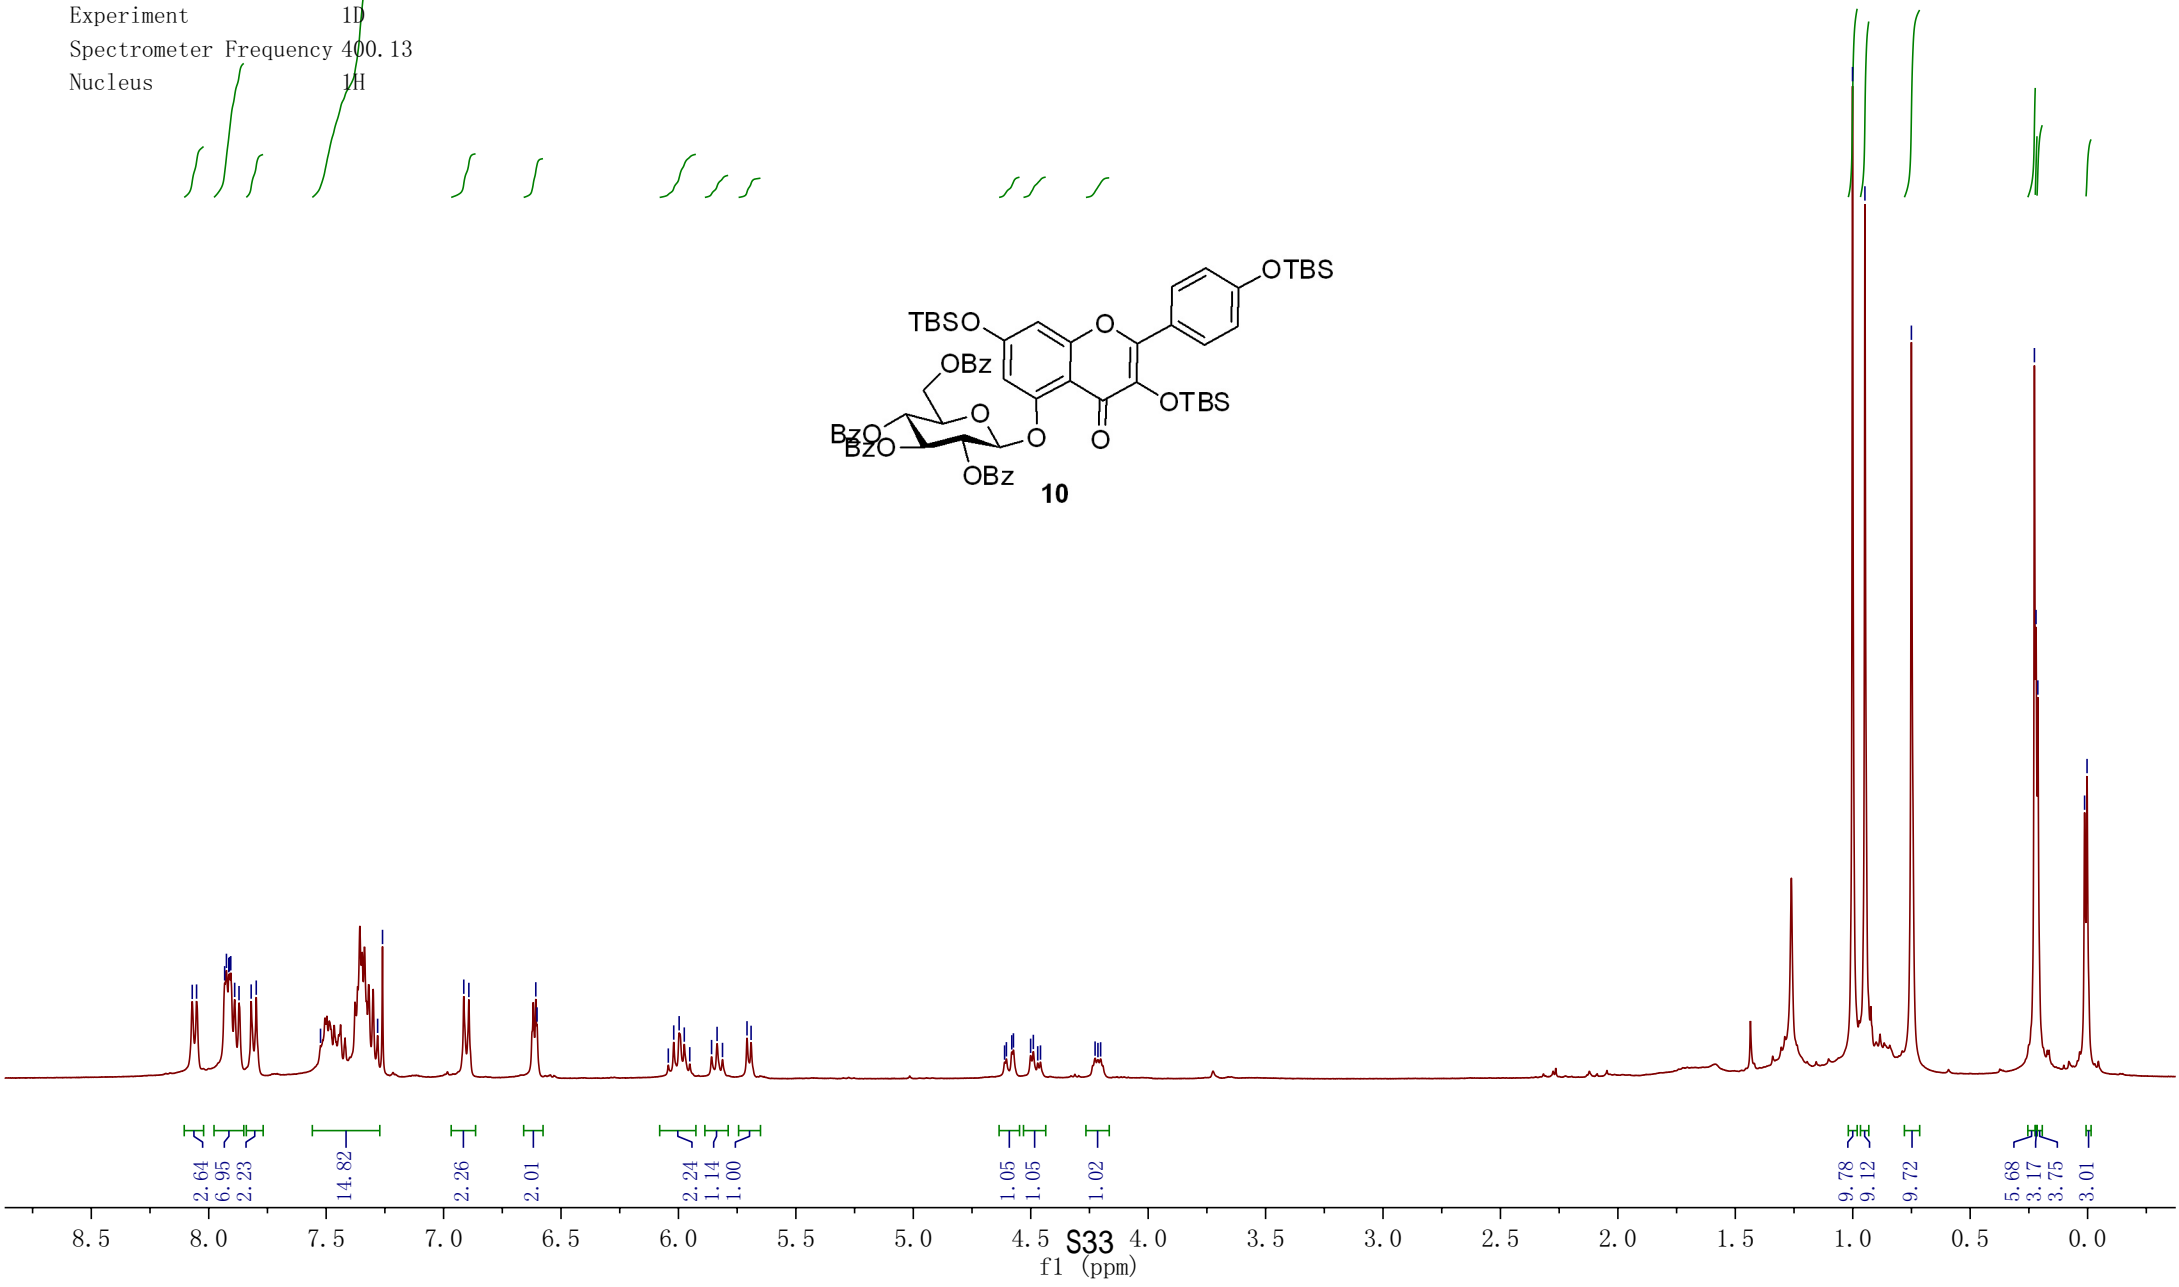

172.5182  
166.0122  
165.8121  
165.2161  
165.1202  
159.3297  
157.5692  
157.0806  
155.8864  
149.4758

137.6914  
132.9745  
130.1471  
129.8314  
129.8054  
129.6741  
128.3526  
128.2669  
128.2383  
128.2063

110.8096  
109.6529  
103.8974  
99.9438

77.3186  
77.2031  
77.0005  
77.0000  
76.6831  
73.0916  
72.4497  
71.9934  
69.5894  
65.5167  
62.9548

25.7767  
25.6592  
25.4957  
18.7295  
18.2750  
18.1753

0.9890  
-3.8894  
-4.0439  
-4.4099

| Parameter              | Value  |
|------------------------|--------|
| Solvent                | CDC13  |
| Experiment             | 1D     |
| Spectrometer Frequency | 100.61 |
| Nucleus                | 13C    |

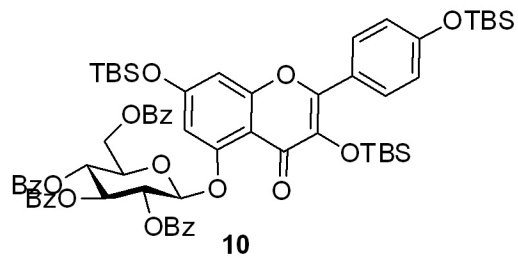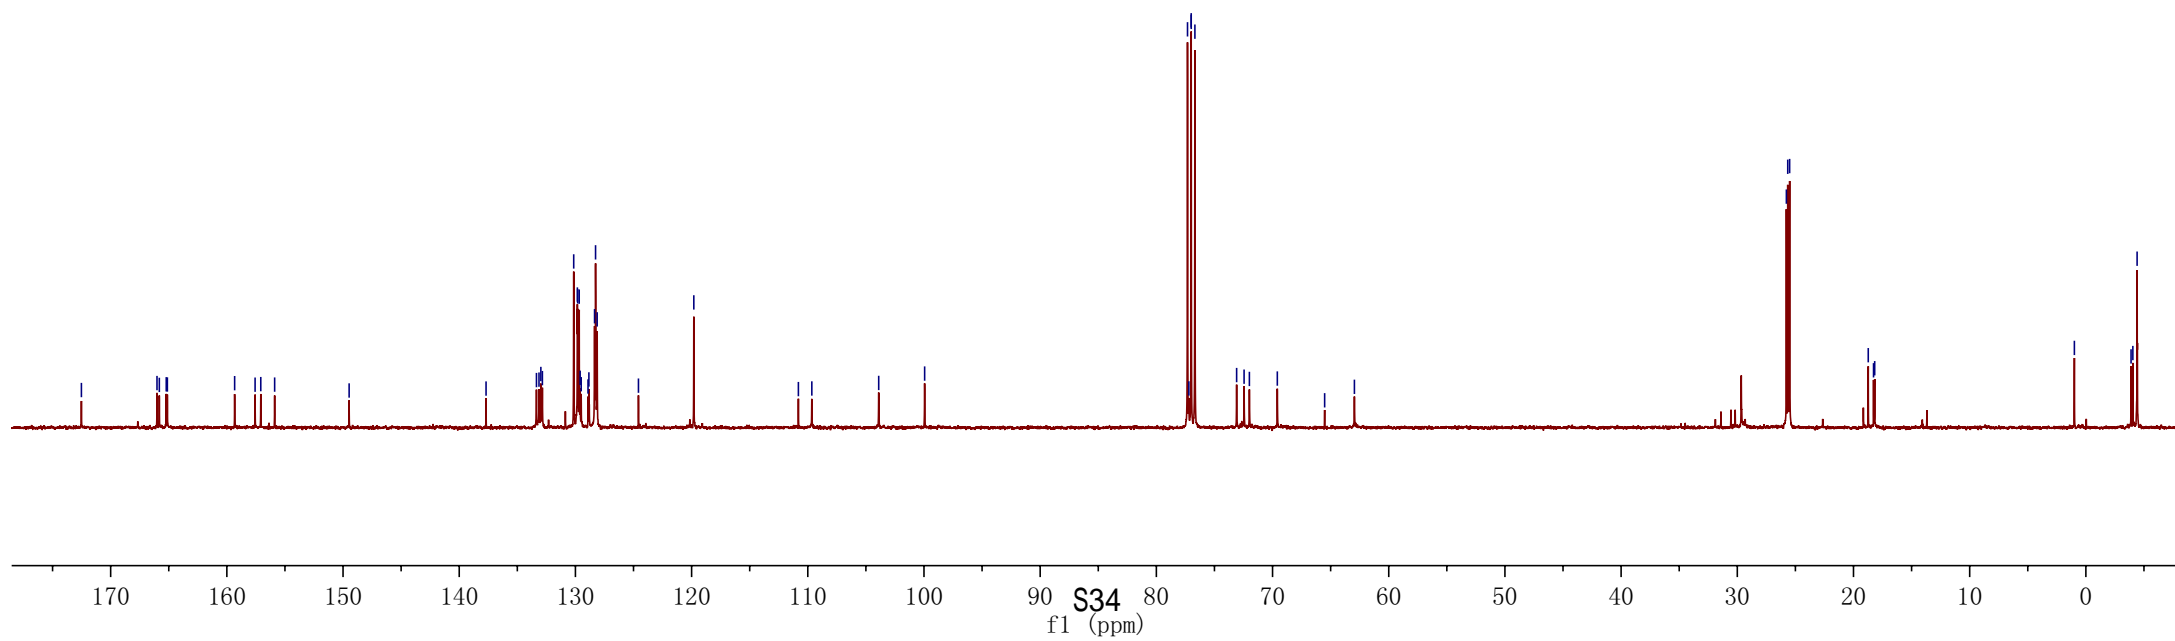

| Parameter                | Value (f2, f1)   |
|--------------------------|------------------|
| 1 Solvent                | CDC13            |
| 2 Experiment             | 2D-HMBC          |
| 3 Spectrometer Frequency | (400.13, 100.61) |
| 4 Nucleus                | (1H, 13C)        |

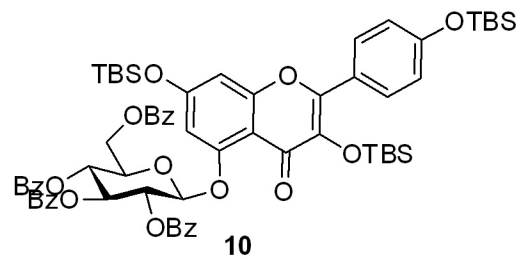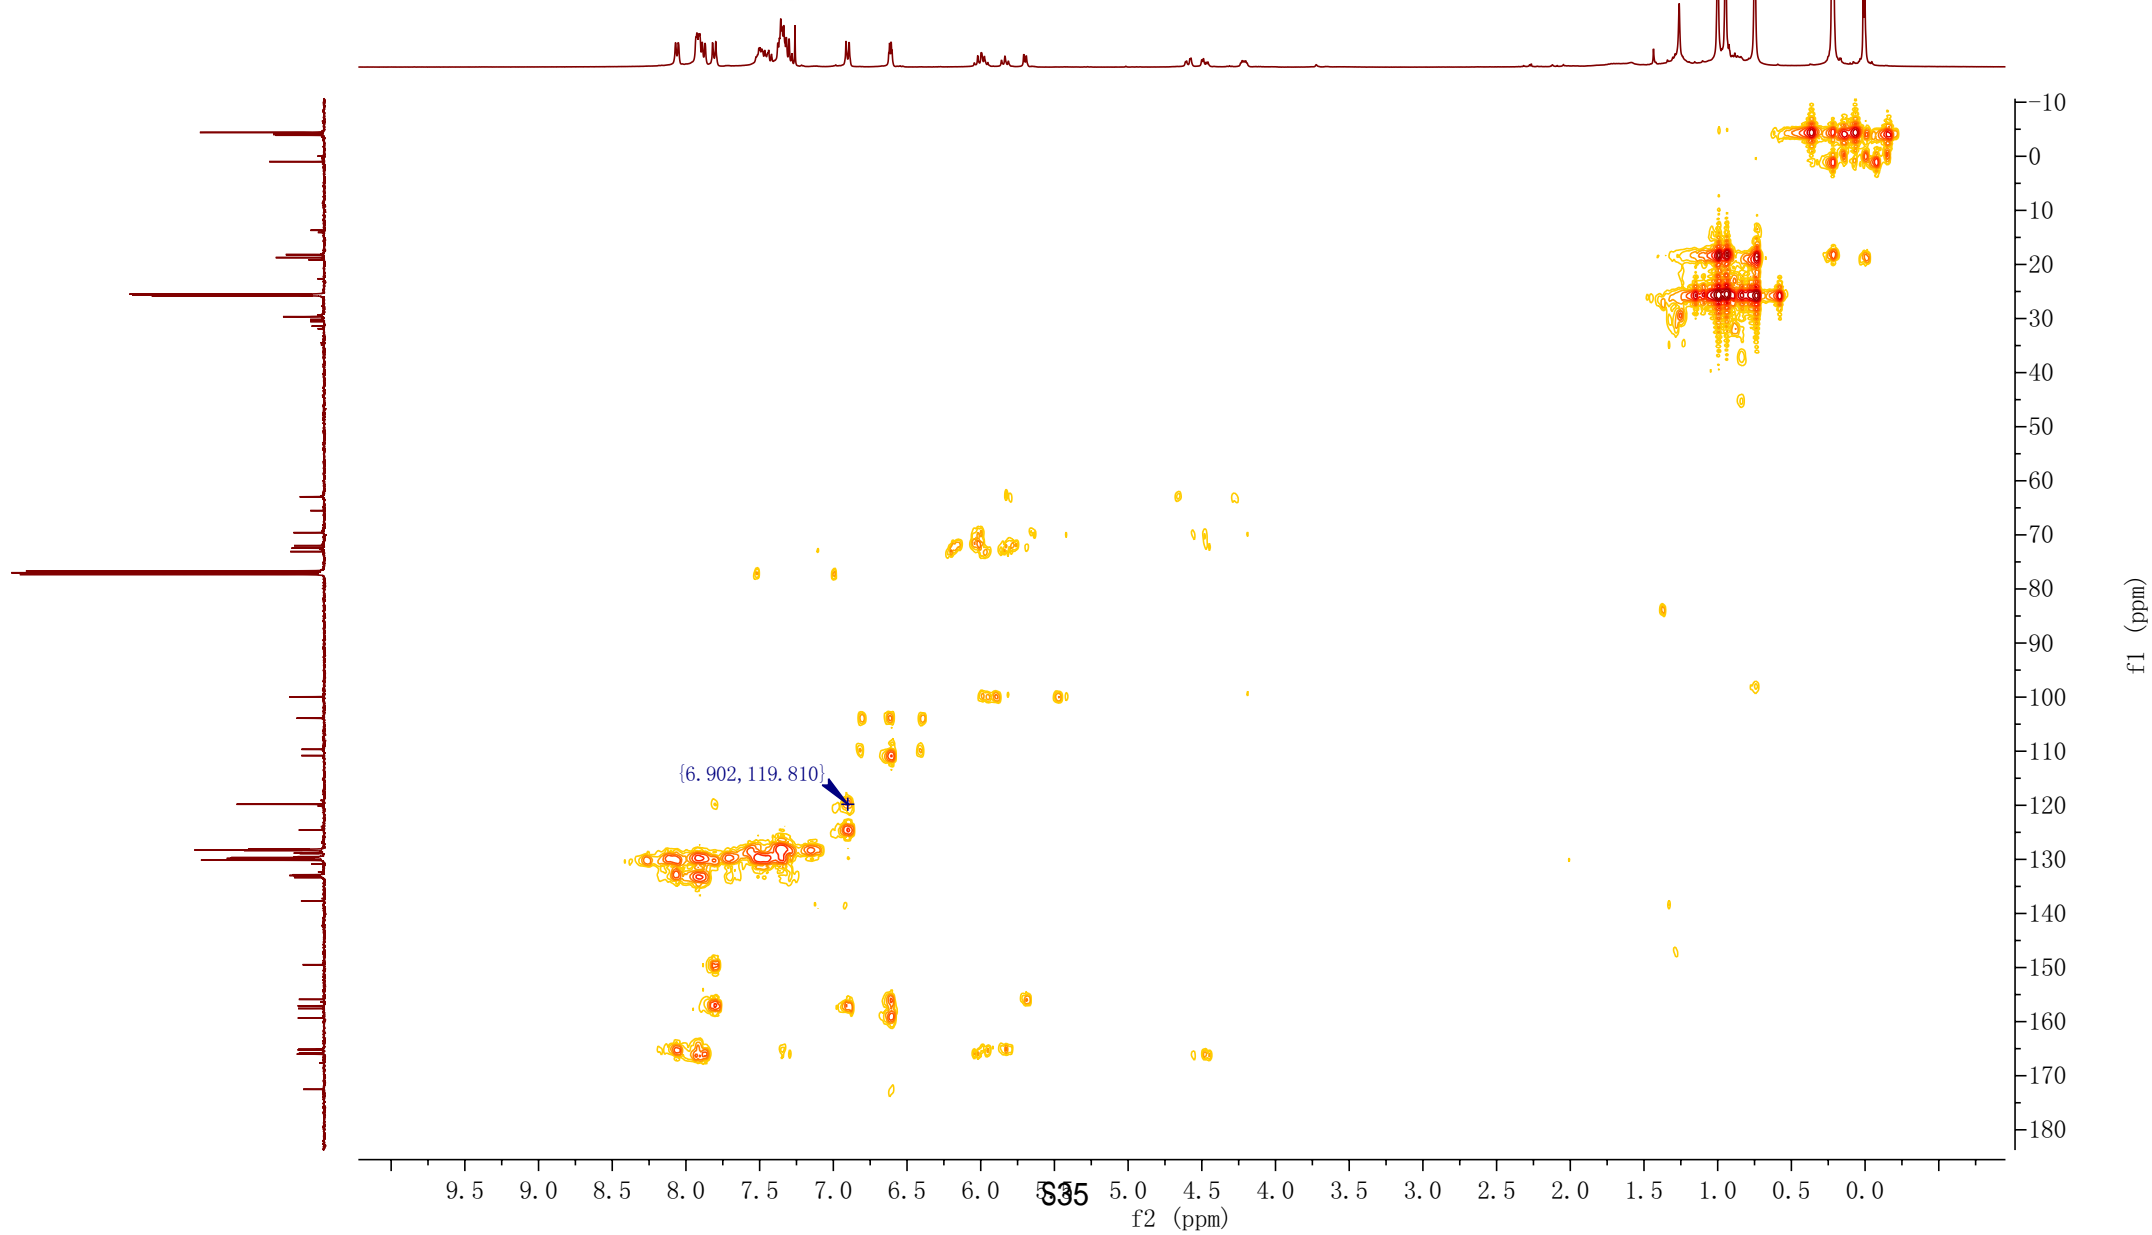

| Parameter                | Value (f2, f1)   |
|--------------------------|------------------|
| 1 Solvent                | CDC13            |
| 2 Experiment             | 2D-NOESY         |
| 3 Spectrometer Frequency | (400.13, 400.13) |
| 4 Nucleus                | (1H, 1H)         |

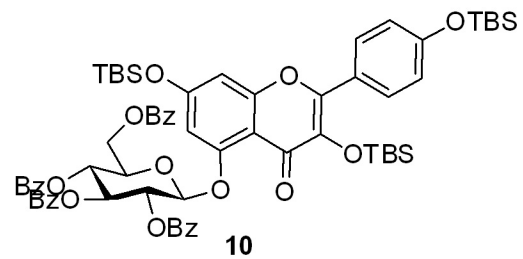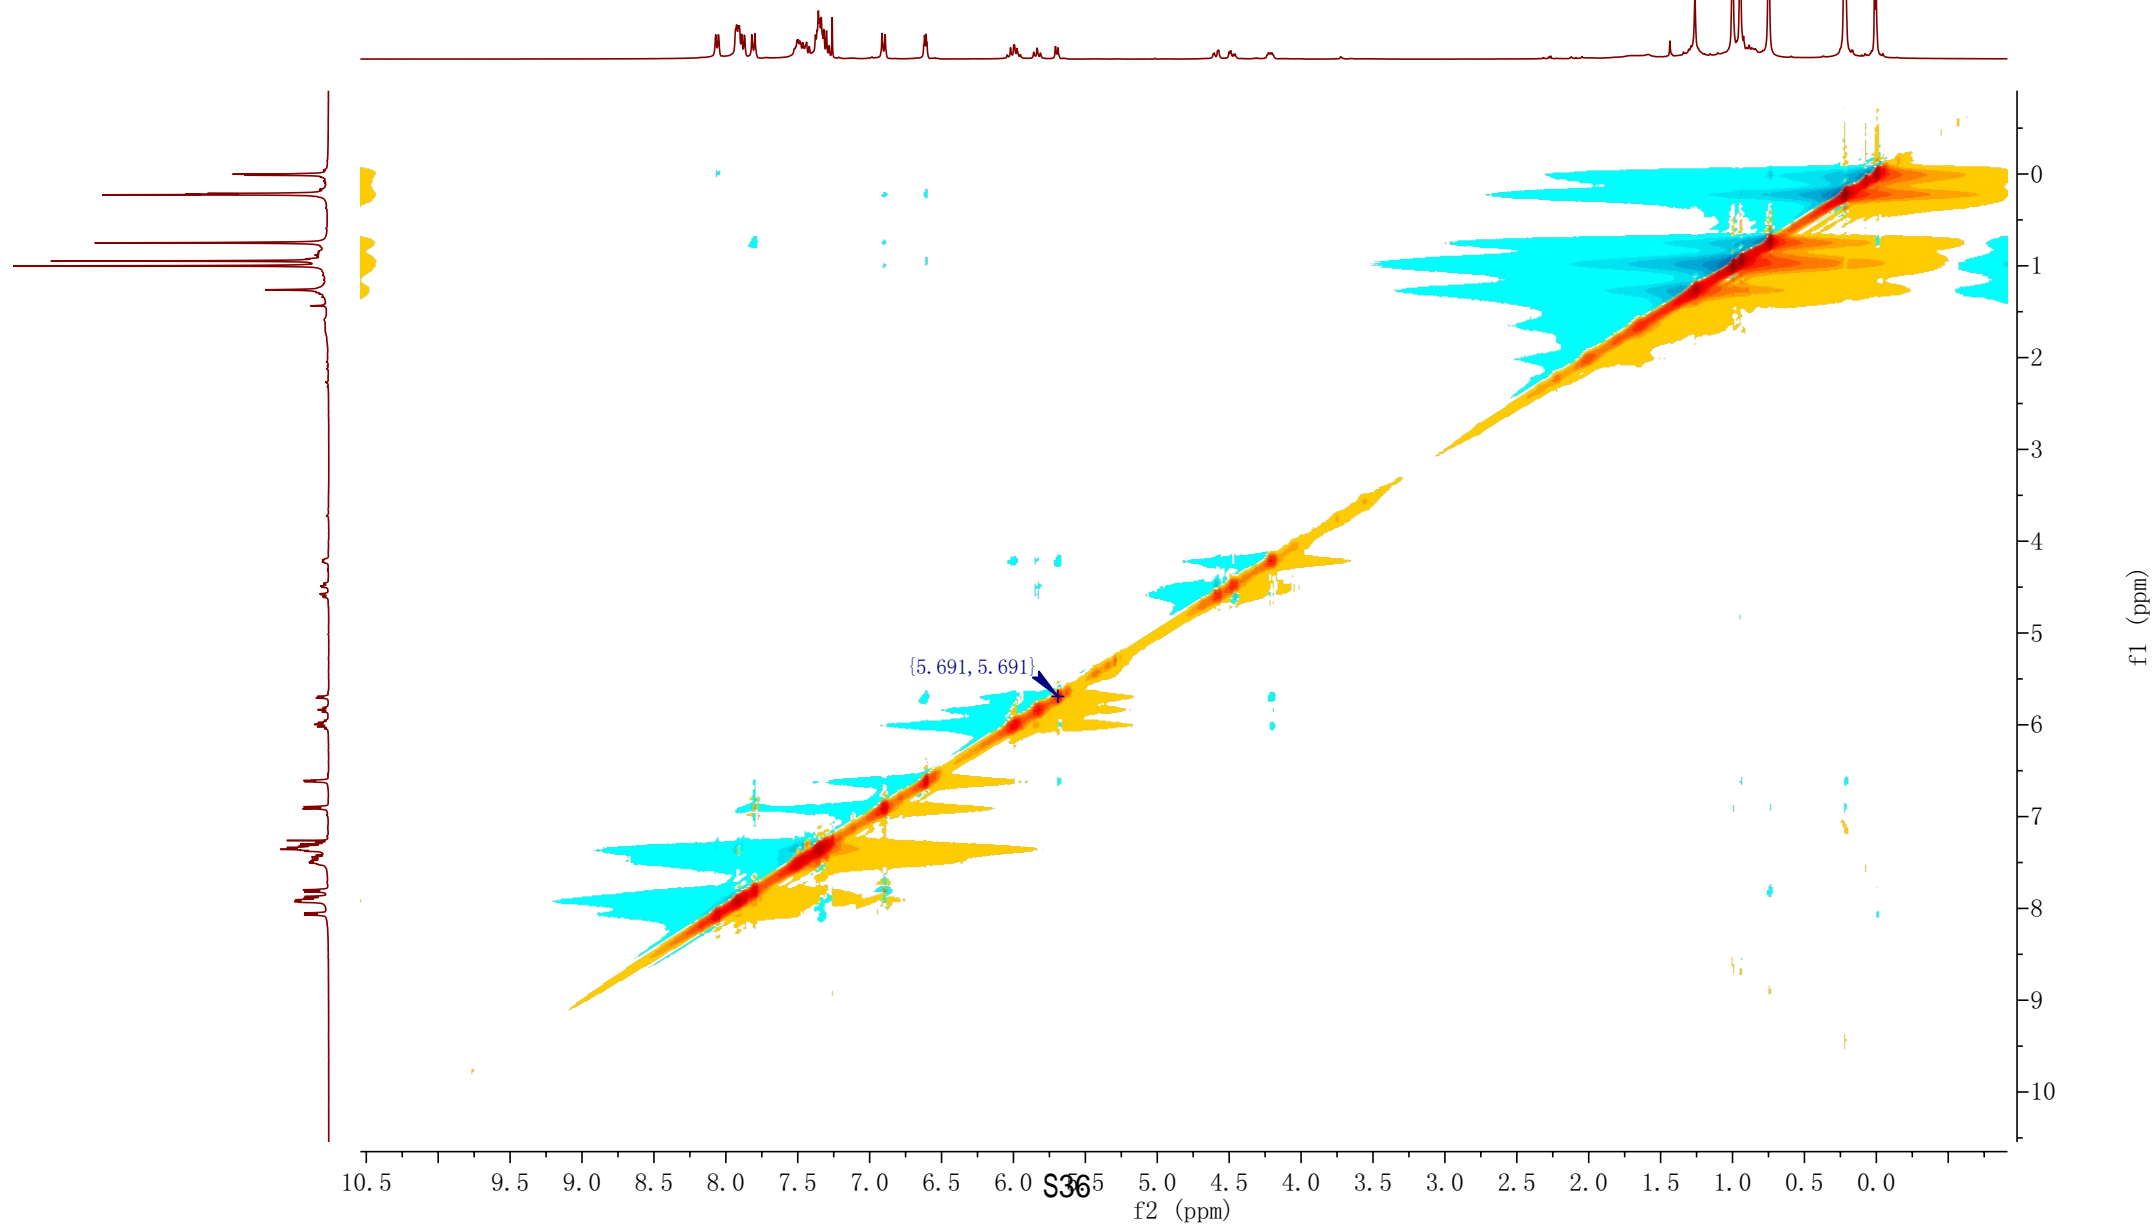

8.0814  
8.0634  
8.0604  
7.9143  
7.9050  
7.8964  
7.8931  
7.8871  
7.8840  
7.8364  
7.8146  
7.6195  
7.6028  
7.5997  
7.5564  
7.5378  
7.2600  
7.2061  
7.1453  
7.1264  
6.9237  
6.8999  
6.8696  
6.6639  
6.6444  
6.6387  
6.0125  
5.9892  
5.9703  
5.9490  
5.9256  
5.9020  
5.8781  
5.8552  
5.8777  
5.6698

3.9310  
3.9239  
3.9164  
3.9003  
3.8932  
3.8276  
3.8207

1.0060  
0.9851  
0.9358  
0.7542

0.2315  
0.1920  
0.1854  
0.0847  
0.0738  
-0.0455

| Parameter              | Value  |
|------------------------|--------|
| Solvent                | CDC13  |
| Experiment             | 1D     |
| Spectrometer Frequency | 400.13 |
| Nucleus                | 1H     |

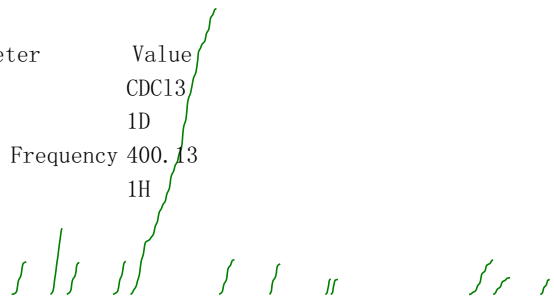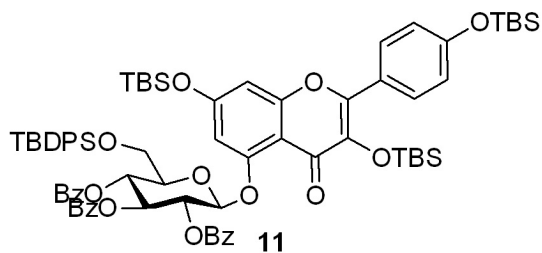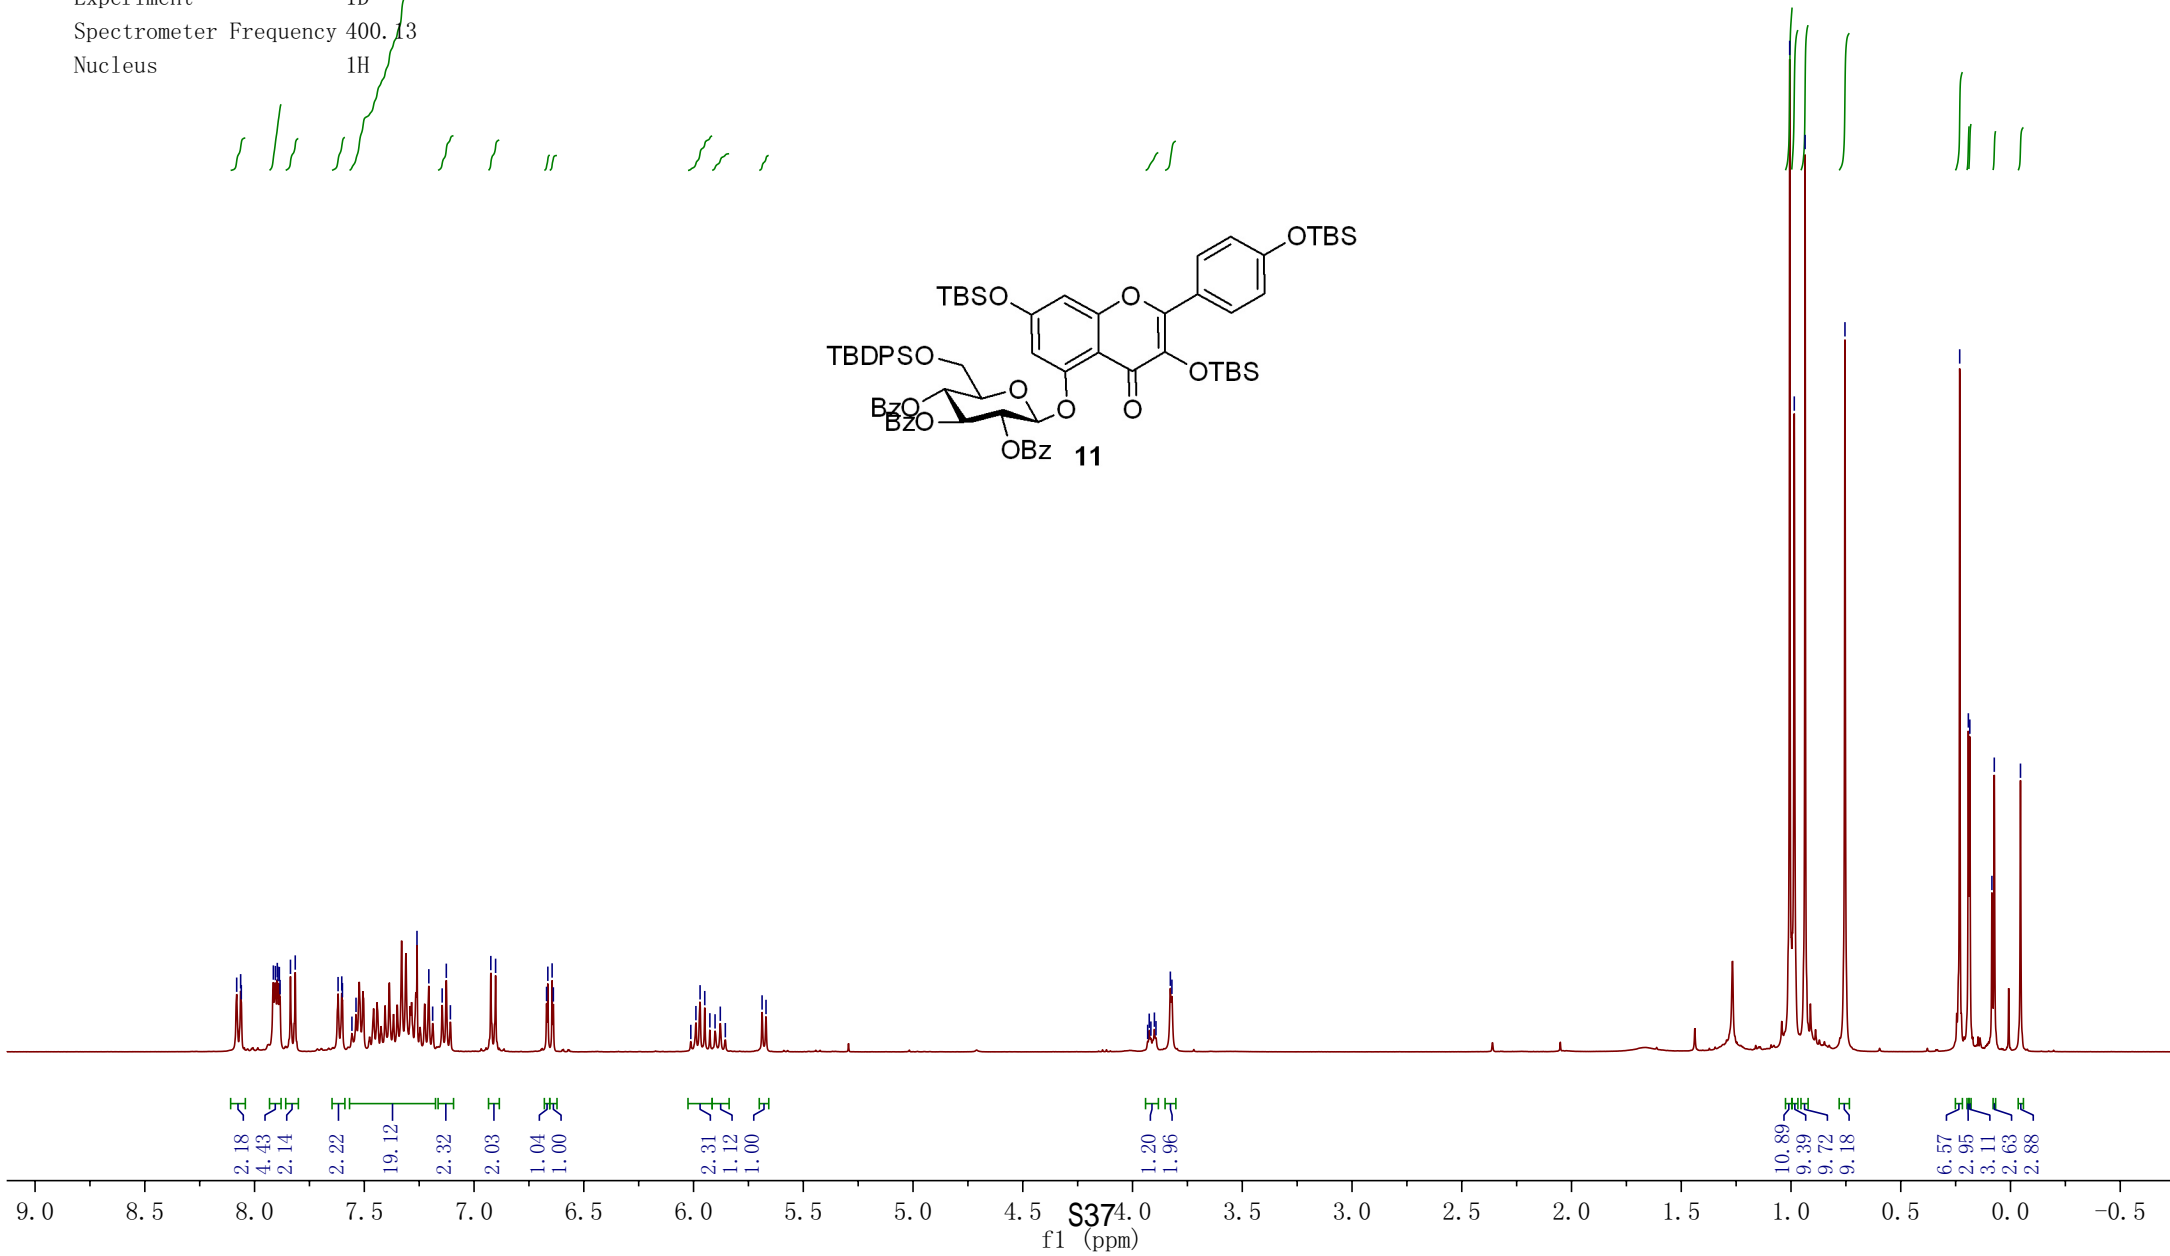

172.5546  
 165.9693  
 165.2147  
 164.8751  
 159.4050  
 157.6240  
 157.0435  
 156.4351

149.3830  
 135.5580  
 135.4155  
 133.1299  
 133.0157  
 130.1649  
 129.8585  
 129.7720  
 129.5160  
 129.4639  
 128.3255  
 128.2276  
 128.0733  
 127.6129  
 127.5304  
 127.5248

110.8140  
 109.3231  
 103.5495  
 100.1166

77.3173  
 77.2024  
 77.0000  
 76.9999  
 76.6823  
 75.1568  
 73.5923  
 72.0467  
 68.9301  
 62.1626

26.5261  
 25.7757  
 25.6726  
 25.5122  
 19.0589  
 18.7455  
 18.2924  
 18.1614

3.9505  
 4.0471  
 4.3523  
 4.3834  
 4.3981

| Parameter              | Value  |
|------------------------|--------|
| Solvent                | CDC13  |
| Experiment             | 1D     |
| Spectrometer Frequency | 100.61 |
| Nucleus                | 13C    |

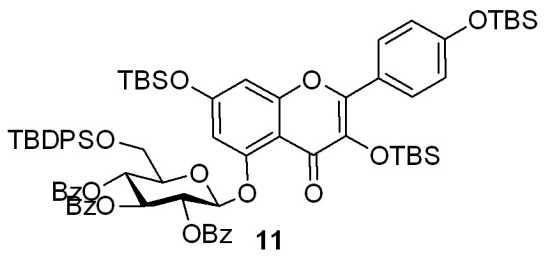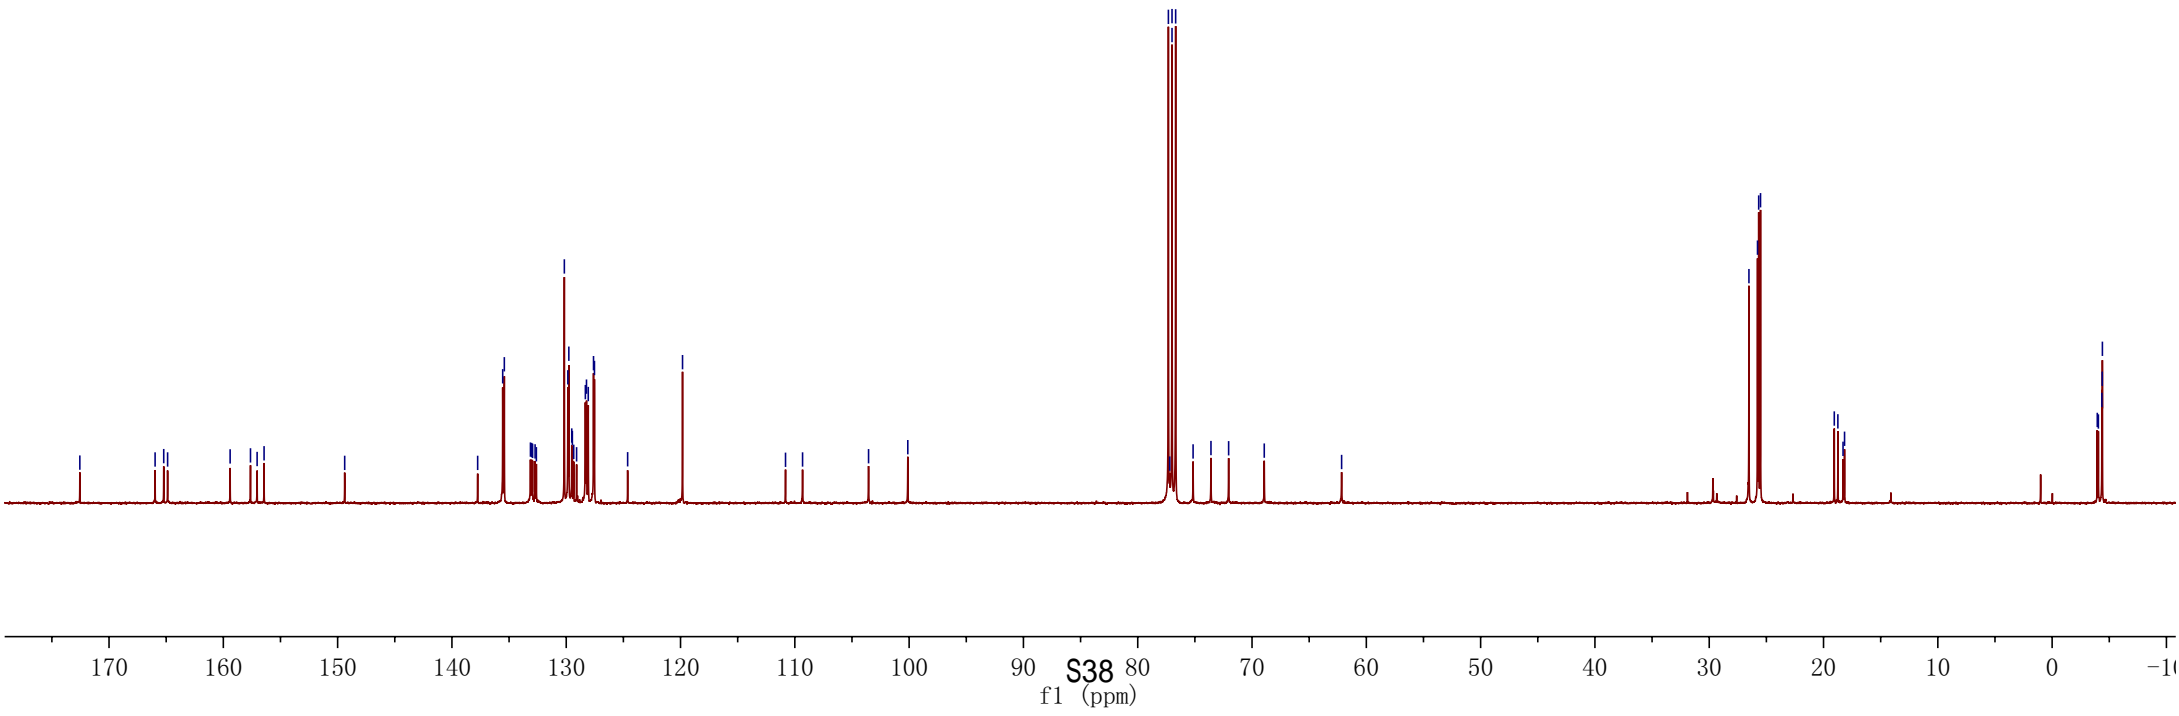

8.1376  
8.1192  
8.0578  
8.0393  
7.9440  
7.9254  
7.8433  
7.8245  
7.8170  
7.7951  
7.6470  
7.6285  
7.6100  
7.5424  
7.2600  
7.2383

6.9141  
6.8924

6.6987  
6.6260  
6.6205

6.2473  
6.2414  
6.2214  
6.0789

6.0666  
5.6945  
5.6769  
5.6684  
5.6488  
5.6290

4.6829  
4.6592  
4.6464  
4.6229  
4.4437  
4.4258  
4.4072  
4.3841

1.0001  
0.9795

0.7370

0.2607  
0.2254  
0.0661  
0.0027  
-0.1033

| Parameter              | Value  |
|------------------------|--------|
| Solvent                | CDCl3  |
| Experiment             | 1D     |
| Spectrometer Frequency | 400.13 |
| Nucleus                | 1H     |

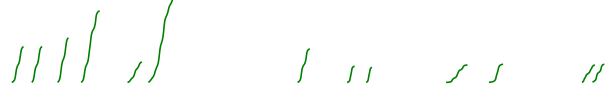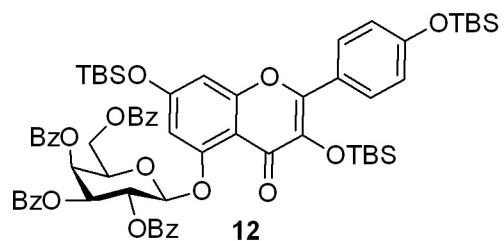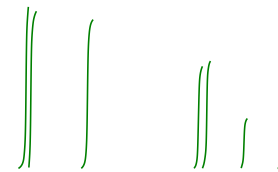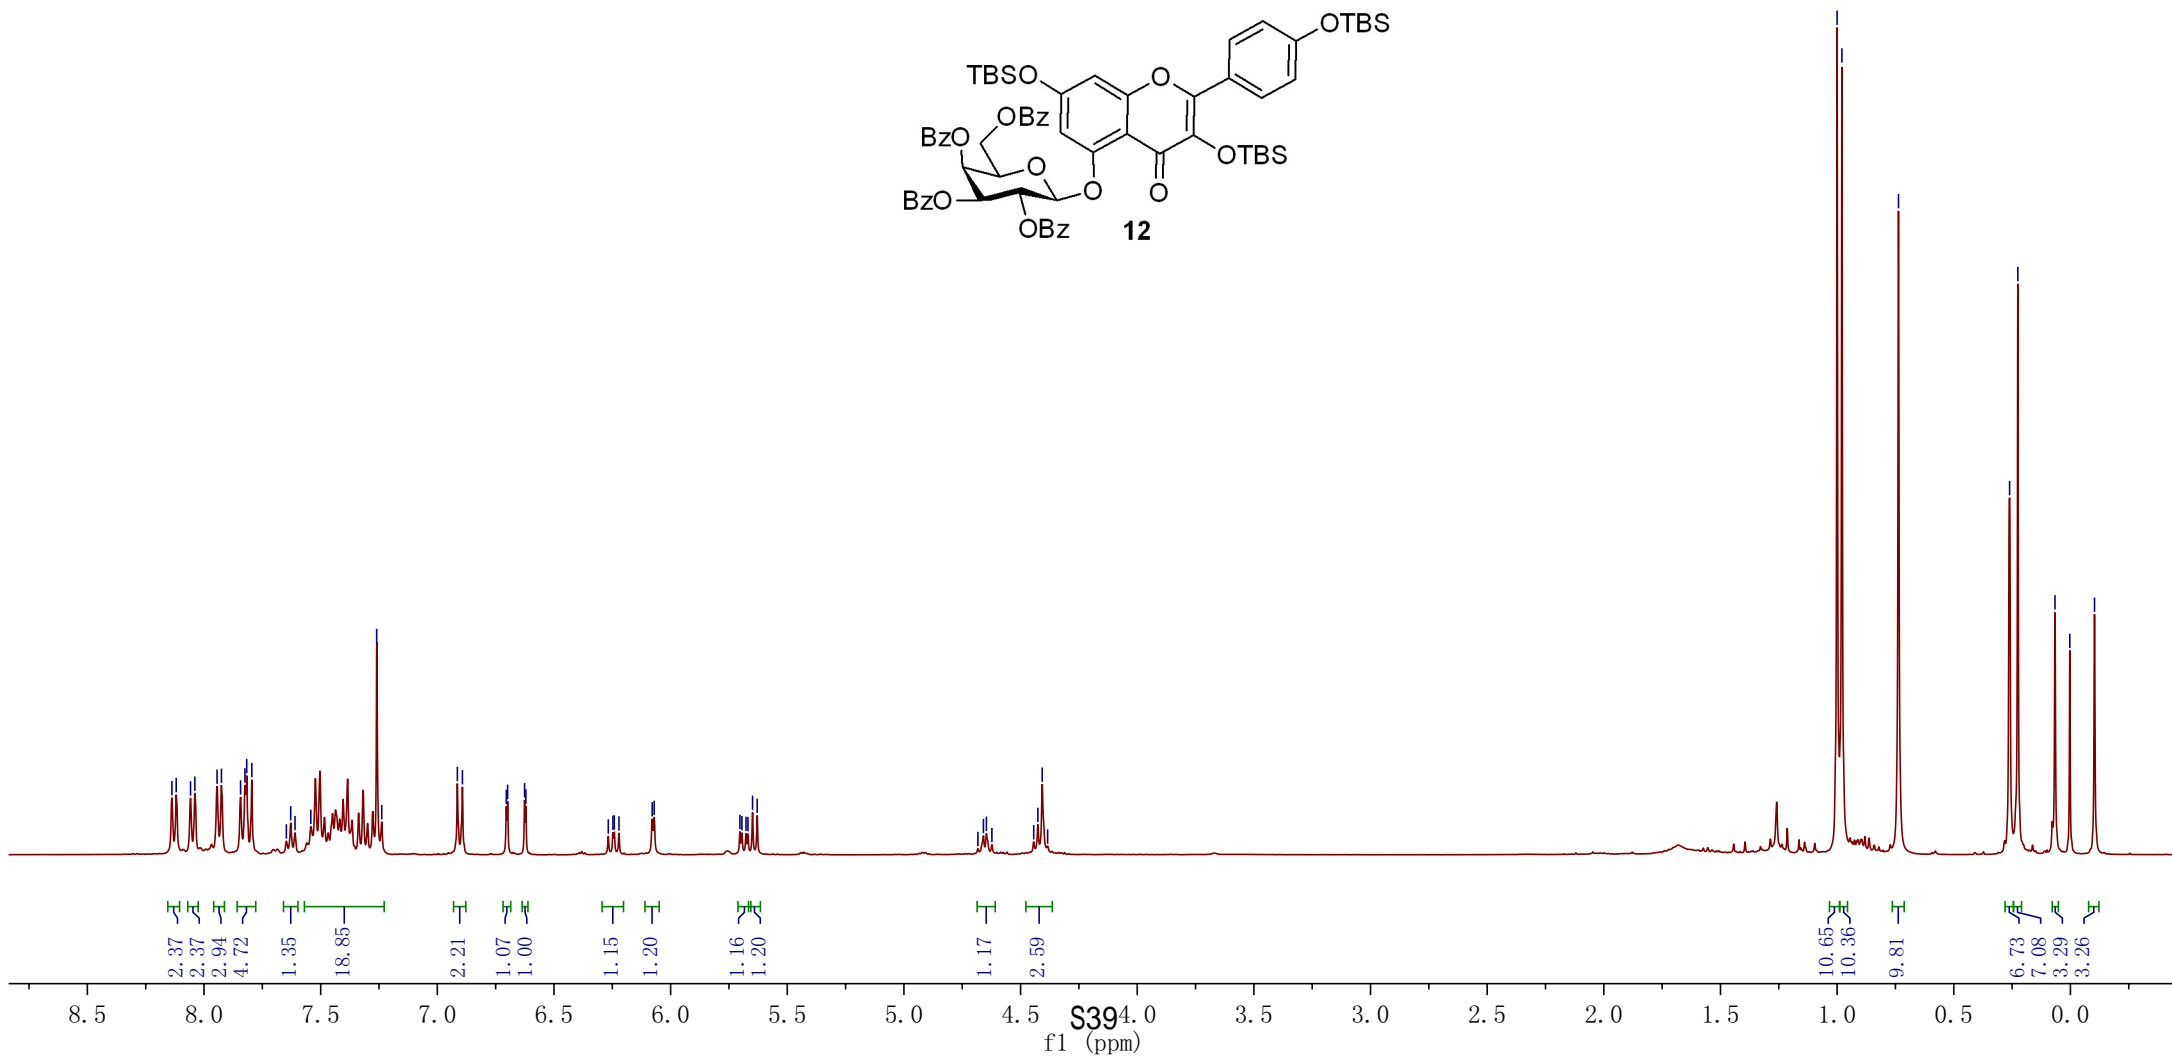

172.5240  
 165.9407  
 165.6217  
 165.2987  
 159.4066  
 157.6073  
 157.0754  
 156.3541  
 149.4567

137.7299  
 130.1611  
 130.0836  
 129.8242  
 129.7341  
 128.6140  
 128.4020  
 128.2583  
 128.1131  
 128.1177

110.7243  
 109.0590  
 103.7510  
 100.5911

77.3176  
 77.2037  
 77.0003  
 77.0000  
 76.6824  
 71.9379  
 71.5563  
 69.4448  
 67.9722  
 61.7251

25.7706  
 25.6674  
 25.5576  
 18.7253  
 18.2864  
 18.2553

-3.9032  
 -4.1095  
 -4.3098  
 -4.3396  
 -4.4044

| Parameter              | Value           |
|------------------------|-----------------|
| Solvent                | CDC13           |
| Experiment             | 1D              |
| Spectrometer Frequency | 100.61          |
| Nucleus                | <sup>13</sup> C |

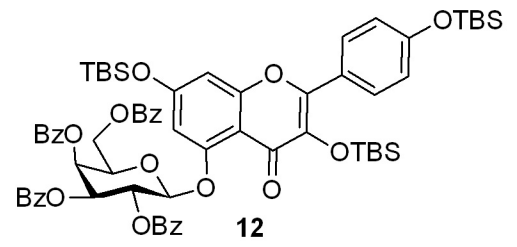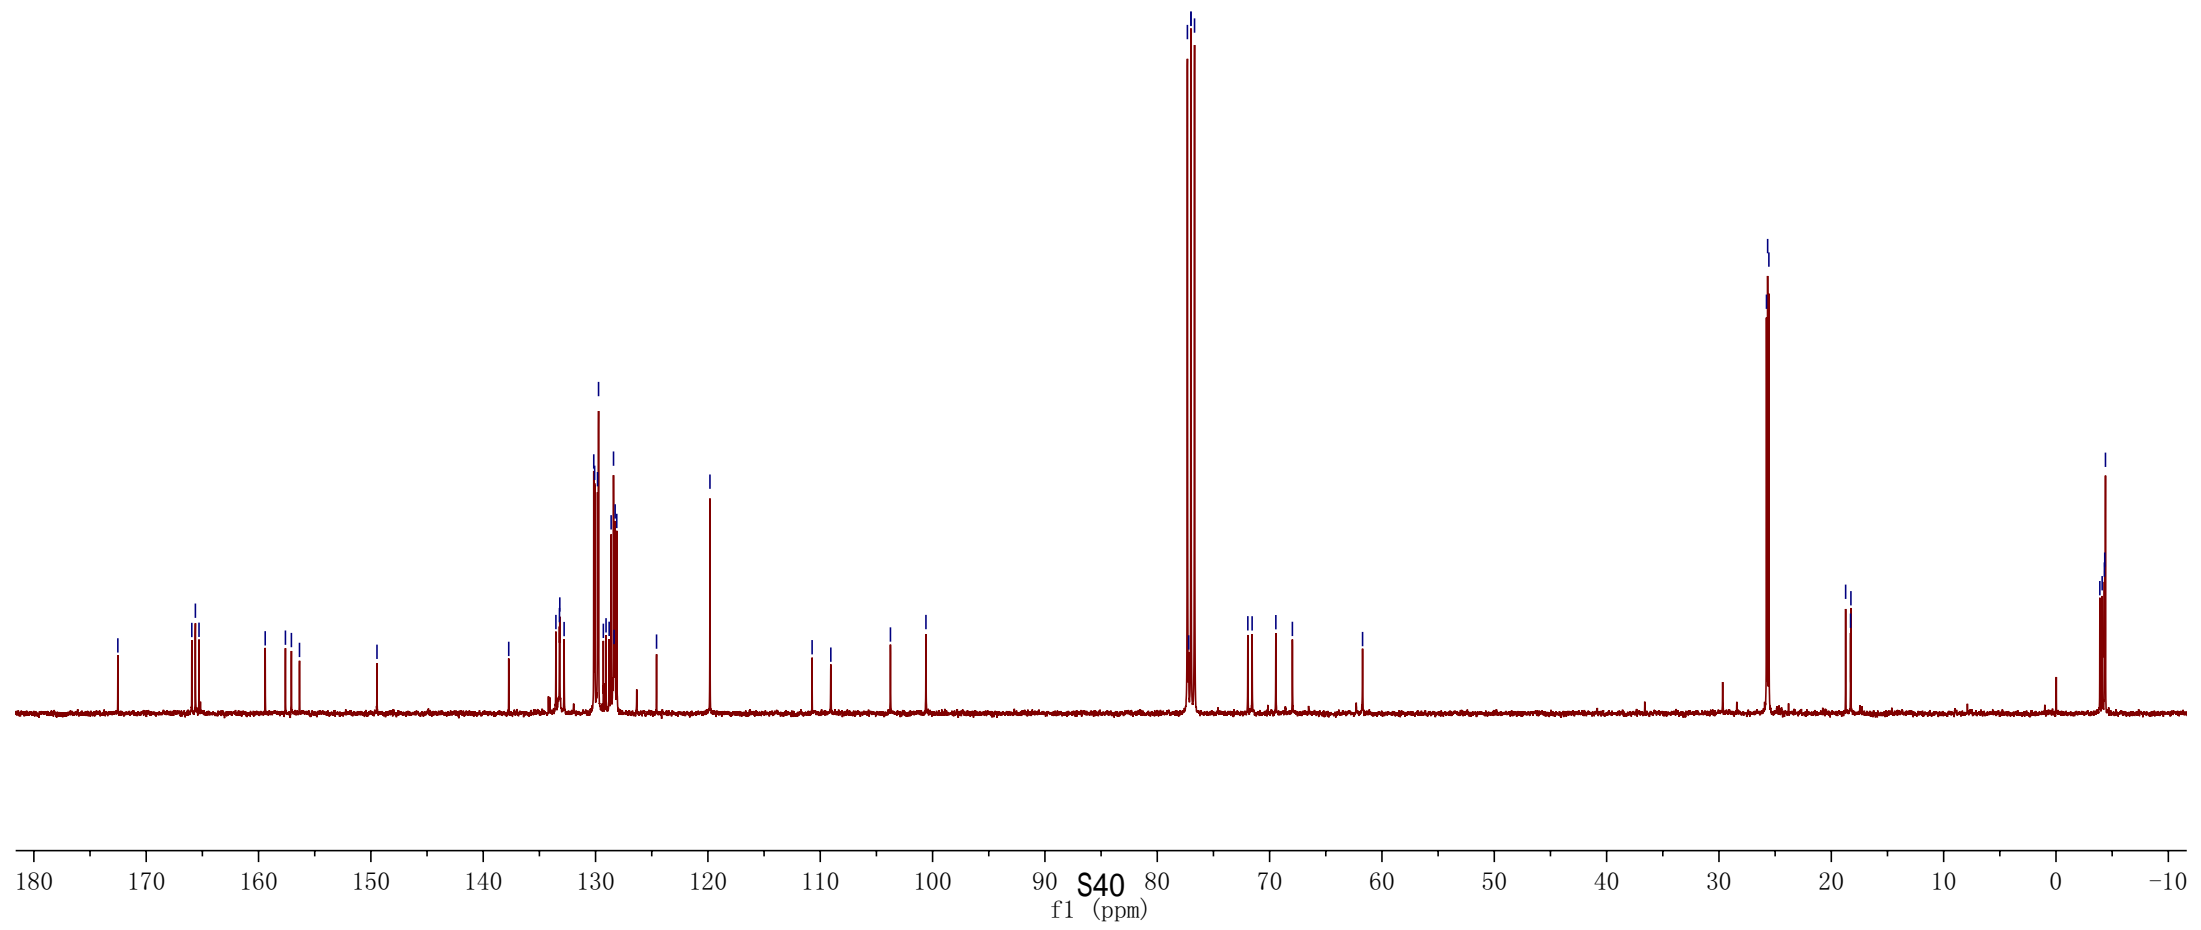



8.1722  
8.1543  
8.0474  
8.0292  
7.9347  
7.9129  
7.8878  
7.8697  
7.5354  
7.5161  
7.4027  
7.3834  
7.2860  
7.2663  
7.2604  
7.2509  
7.2512  
6.9295  
6.6213  
6.6162  
6.5448  
6.5397  
6.5323  
6.5068  
6.1336  
6.1291  
6.1259  
6.1254  
5.8132  
5.7884  
5.7634

4.5496  
4.5339  
4.5253  
4.5097

1.3298  
1.3143

1.0131  
1.0067  
0.8474

0.3553  
0.3136  
0.2941  
0.2908  
0.2448  
0.0800

| Parameter              | Value  |
|------------------------|--------|
| Solvent                | CDC13  |
| Experiment             | 1D     |
| Spectrometer Frequency | 400.13 |
| Nucleus                | 1H     |

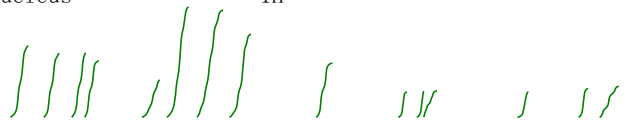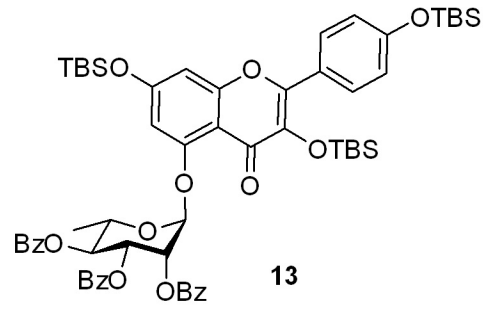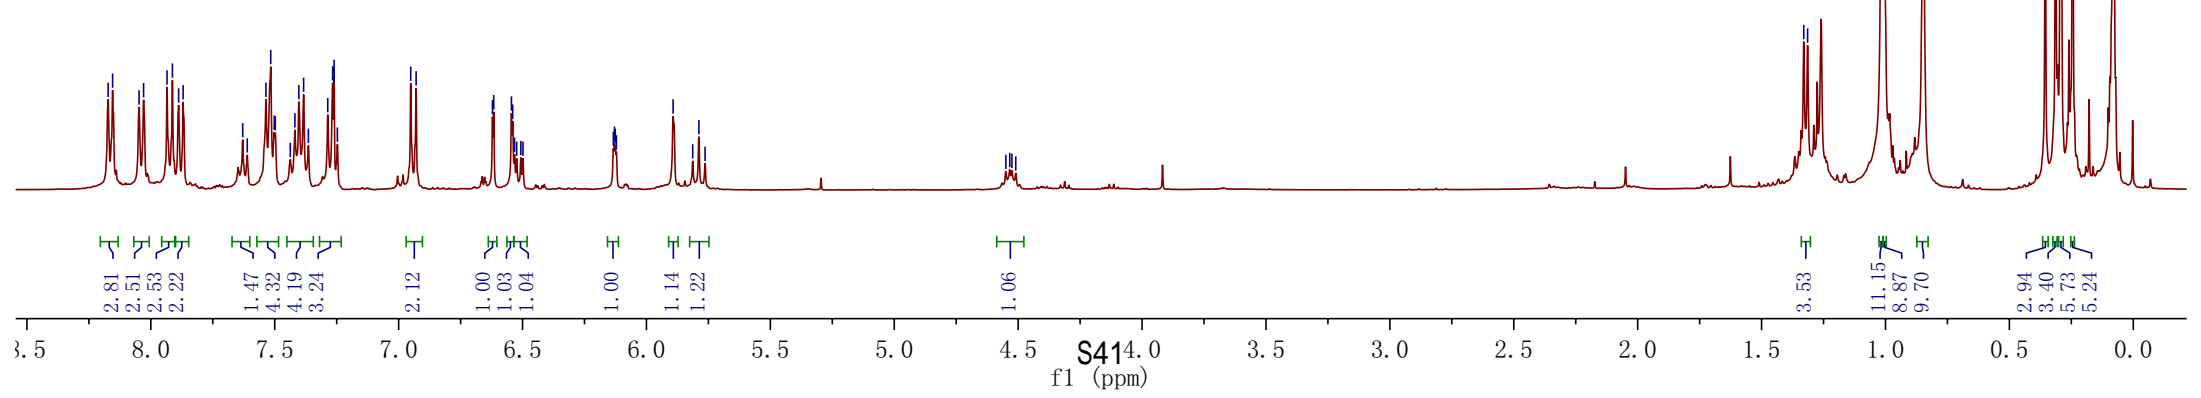

— 172.7287  
 — 165.9621  
 — 165.4809  
 — 164.9201  
 — 159.7063  
 — 157.9198  
 — 157.0669  
 — 155.4782  
 — 149.0835

— 138.0220  
 — 130.1206  
 — 129.9673  
 — 129.8918  
 — 129.7323  
 — 129.5278  
 — 128.5641  
 — 128.3026  
 — 128.1589  
 — 128.0889

— 110.1843  
 — 105.2709  
 — 102.5634  
 — 96.0846

— 77.3176  
 — 77.2023  
 — 77.0003  
 — 77.0000  
 — 76.8821  
 — 72.0003  
 — 70.7216  
 — 69.6673  
 — 68.1869

— 25.9687  
 — 25.6844  
 — 25.6640  
 — 25.5617  
 — 19.0429  
 — 18.3064  
 — 18.2416  
 — 17.6521

— 1.0108  
 — 3.3778  
 — 3.4353  
 — 4.3035  
 — 4.3622  
 — 4.3812

| Parameter              | Value  |
|------------------------|--------|
| Solvent                | CDC13  |
| Experiment             | 1D     |
| Spectrometer Frequency | 100.61 |
| Nucleus                | 13C    |

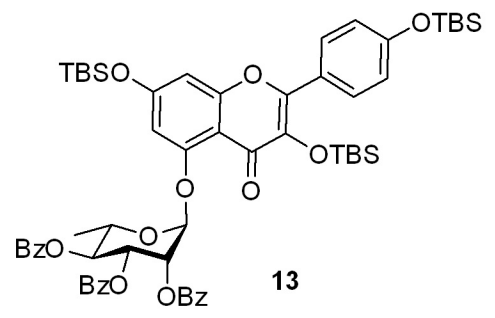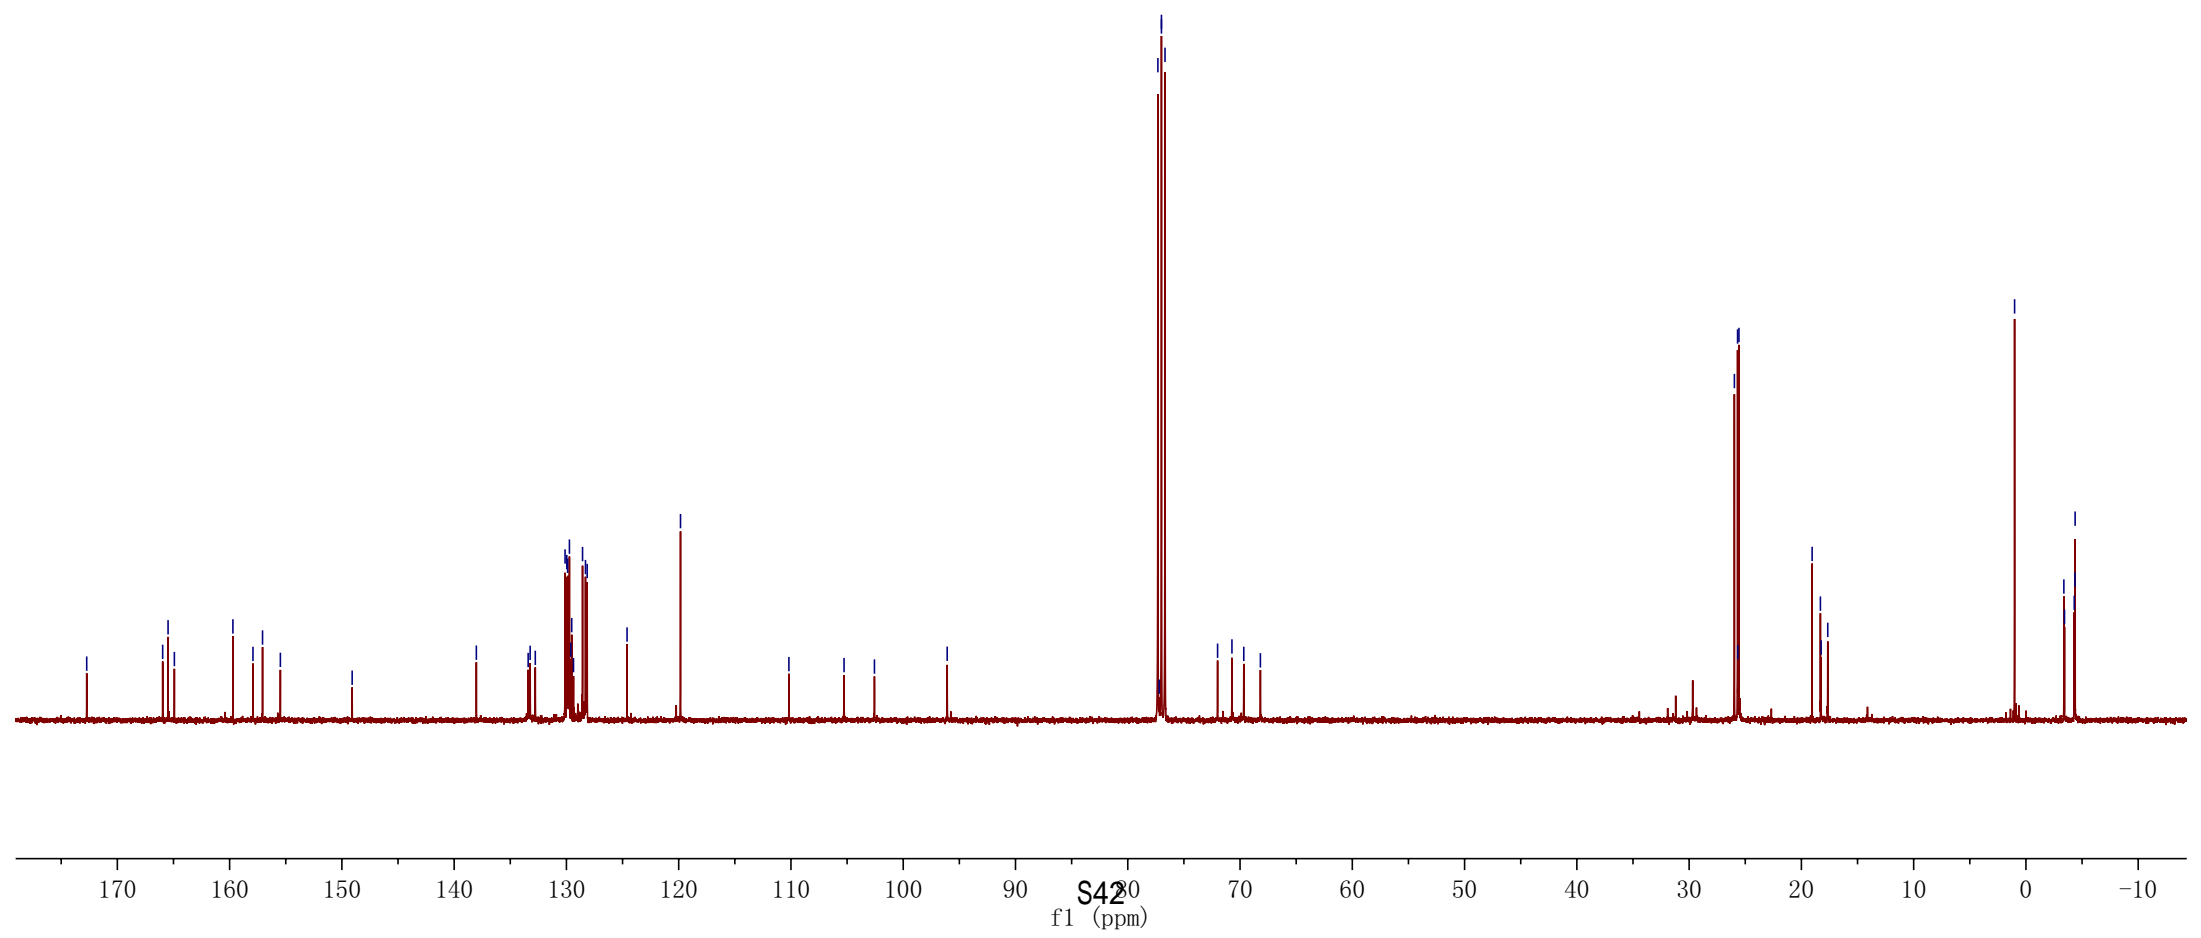

Parameter Value  
 Solvent CDC13  
 Experiment 1D  
 Spectrometer Frequency 400.13  
 Nucleus 1H

8.0760  
8.0579  
7.9212  
7.9050  
7.9012  
7.8852  
7.8671  
7.5181  
7.4092  
7.3732  
7.2798  
7.2602  
7.2600

6.8821  
6.8611  
6.6192  
6.6136  
6.5626  
6.5569  
6.0373  
6.0140  
5.9911  
5.9762  
5.9583  
5.9348  
5.8476  
5.8238  
5.8005  
5.7087  
5.6908

4.5957  
4.5875  
4.5652  
4.5574  
4.4860  
4.4739  
4.4556  
4.4436  
4.2175  
4.2066  
4.1938  
4.1840  
4.1731

1.0024  
0.9897  
0.9418  
0.7308

0.2234  
0.2184  
0.2124  
0.2030  
0.1979  
0.0008  
0.0148  
0.0248

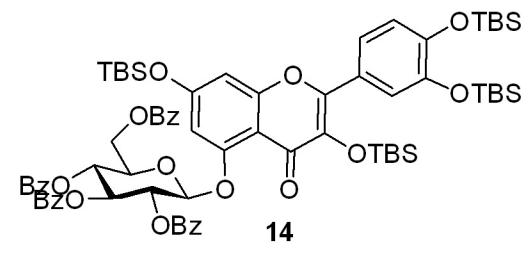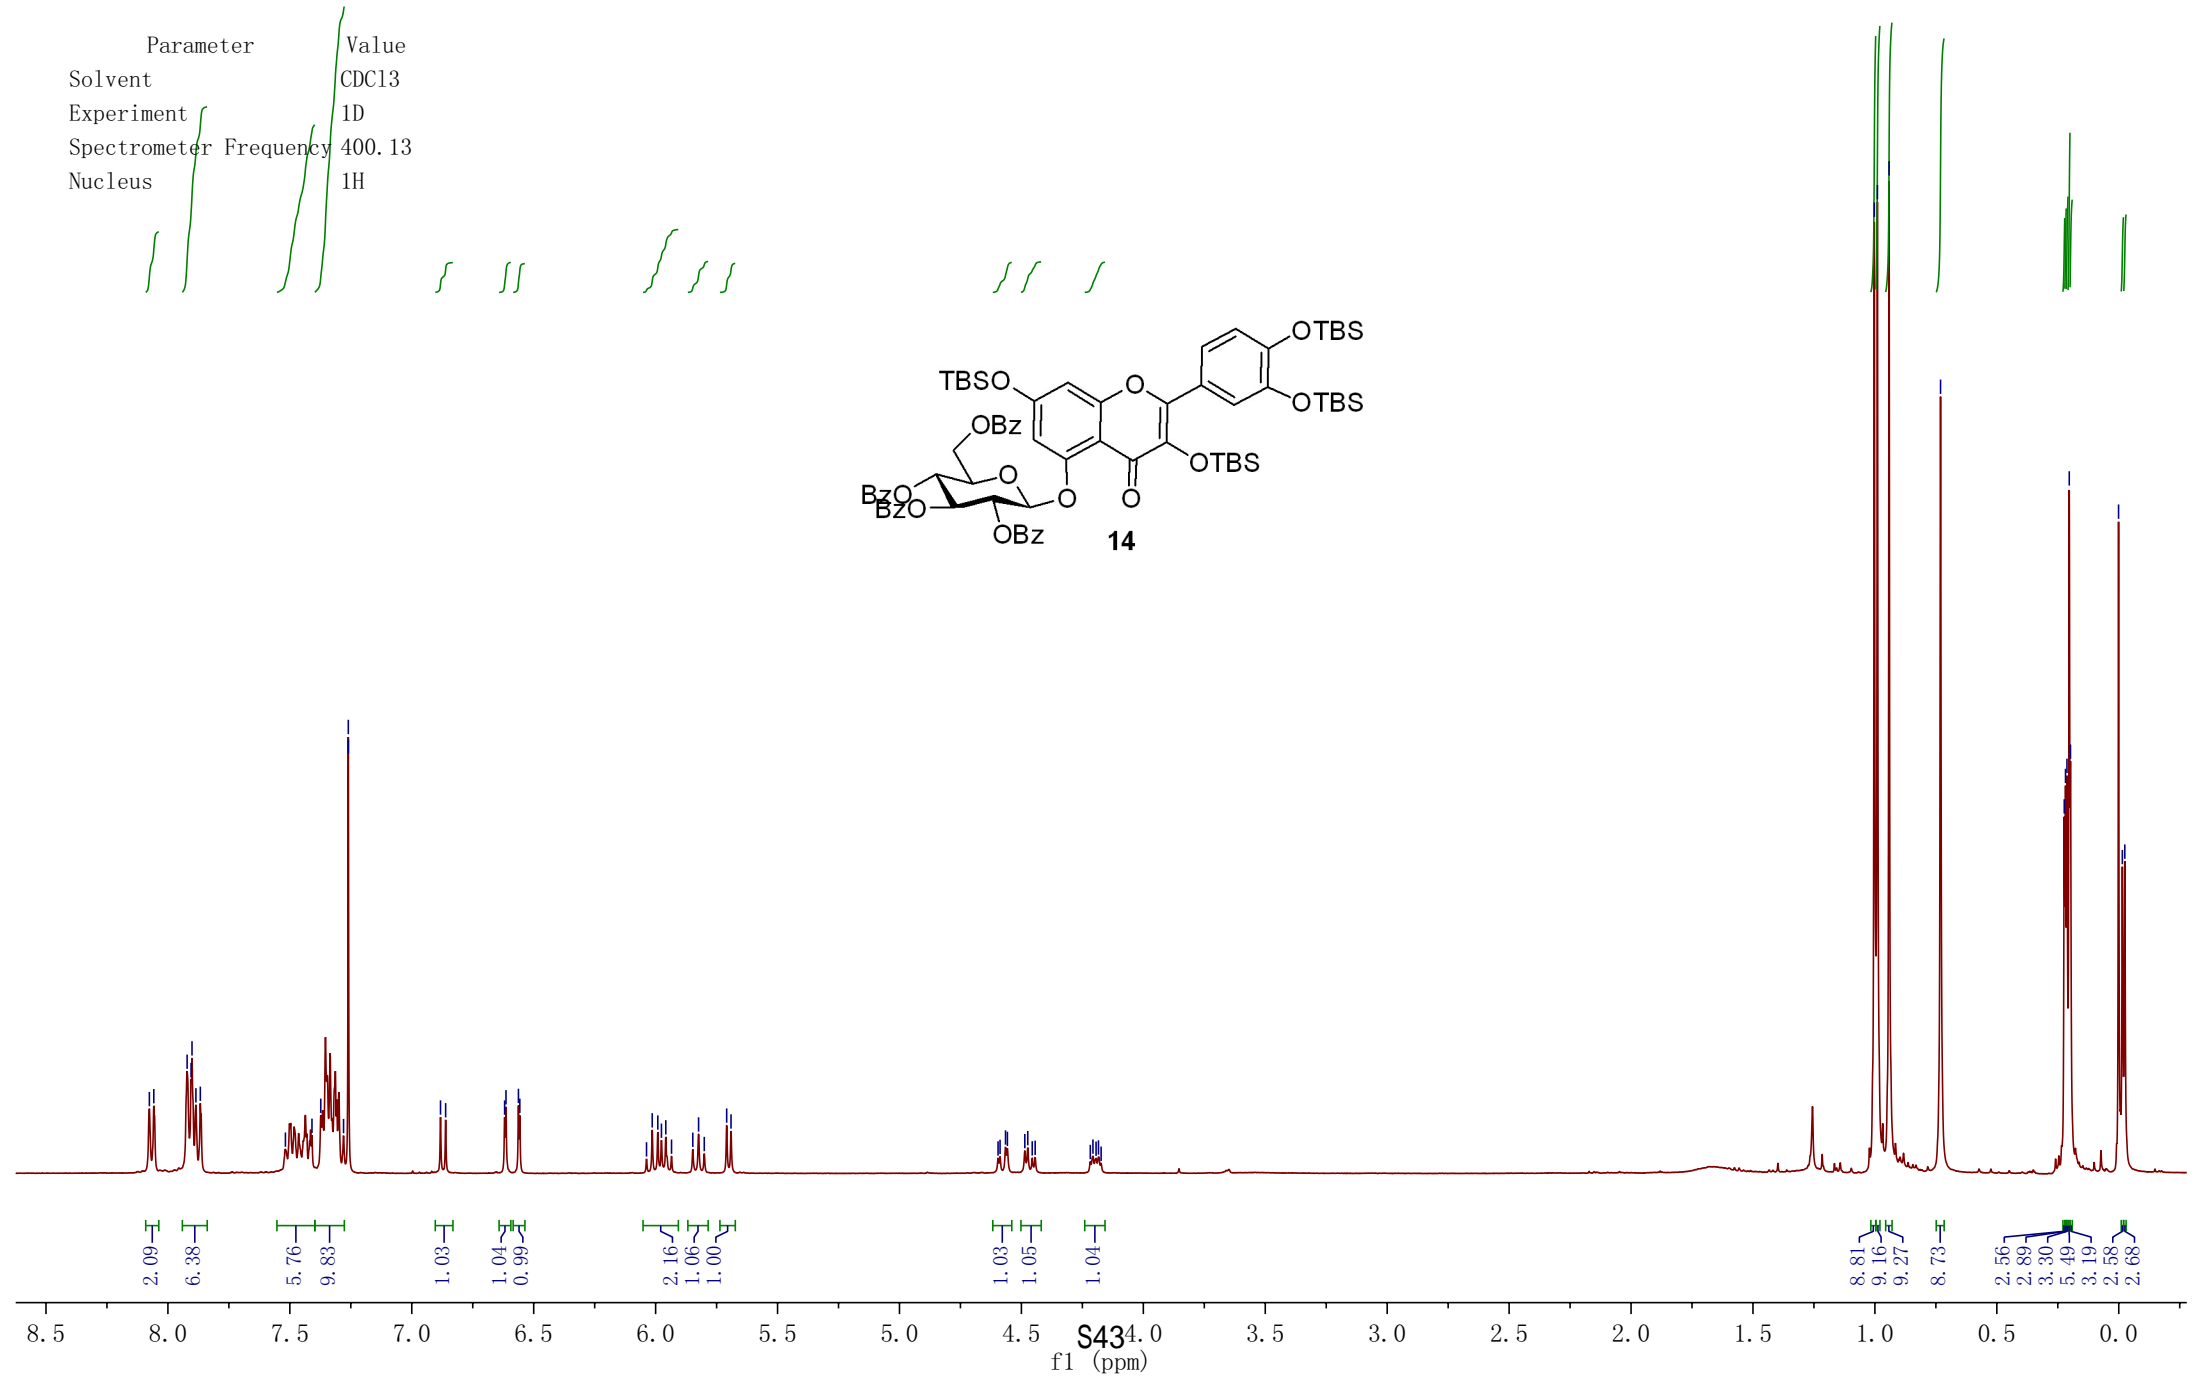

172.6151  
 166.0082  
 165.8018  
 165.2496  
 165.1221  
 159.2897  
 157.5365  
 155.8641  
 149.6337  
 148.6240  
 146.5785

137.6591  
 132.9639  
 130.1343  
 129.8262  
 129.7987  
 129.6660  
 129.6027  
 128.3480  
 128.2536  
 128.1242  
 123.0082  
 121.4447  
 118.6897  
 109.9027  
 103.8578  
 99.9744

77.3178  
 77.2022  
 77.0003  
 77.0000  
 76.6824  
 73.0729  
 72.4270  
 72.0141  
 69.5898  
 62.9436

25.9188  
 25.7361  
 25.5051  
 18.6587  
 18.5456  
 18.4274  
 18.1937

4.0343  
 4.0706  
 4.1121  
 4.1812  
 4.2117  
 4.2467  
 4.4081  
 4.4410

Parameter Value  
 Solvent CDC13  
 Experiment 1D  
 Spectrometer Frequency 100.61  
 Nucleus 13C

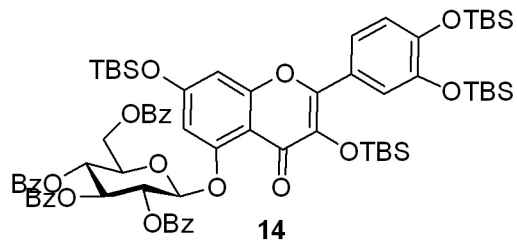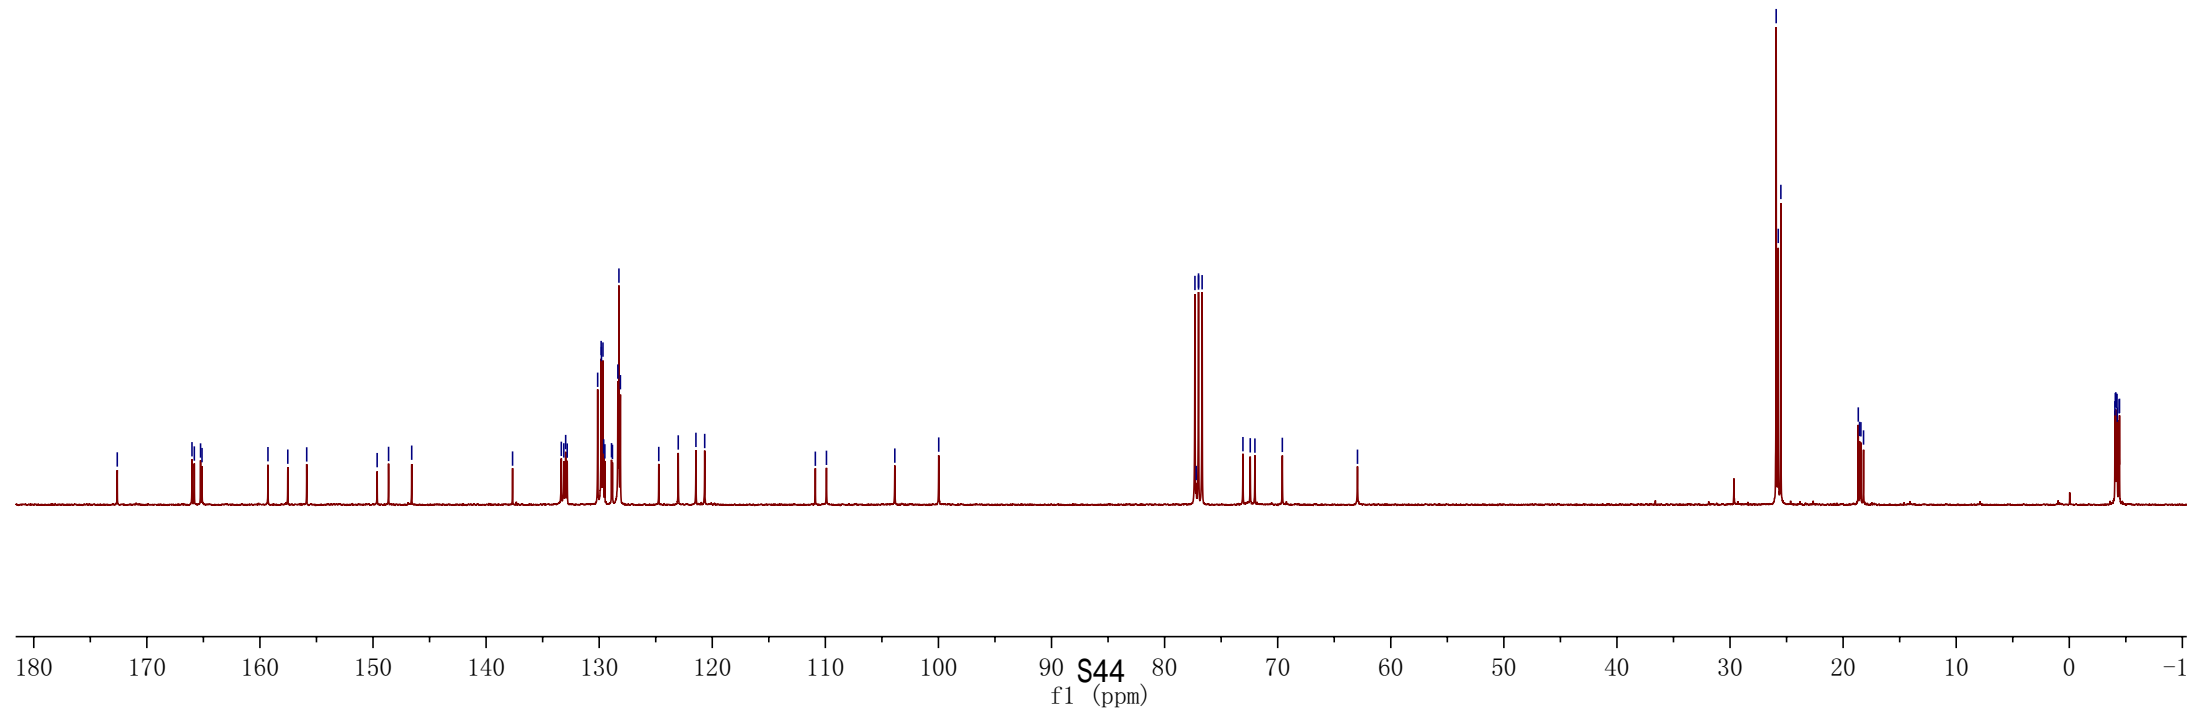

8.0792  
8.0605  
7.9001  
7.8803  
7.6093  
7.5922  
7.5318  
7.5176  
7.2600  
7.2038  
7.1474  
6.8895  
6.8685  
6.6668  
6.6615  
6.5981  
6.5928  
5.9911  
5.9683  
5.9557  
5.9386  
5.9151  
5.8759  
5.8525  
5.8296  
5.6903  
5.6727

3.9130  
3.8891  
3.8176  
3.8113

1.0059  
0.9947  
0.9735  
0.9363  
0.7396

0.2252  
0.2050  
0.1924  
0.1877  
0.0404  
0.0042  
-0.0541

Parameter Value  
Solvent CDC13  
Experiment 1D  
Spectrometer Frequency 400.13  
Nucleus 1H

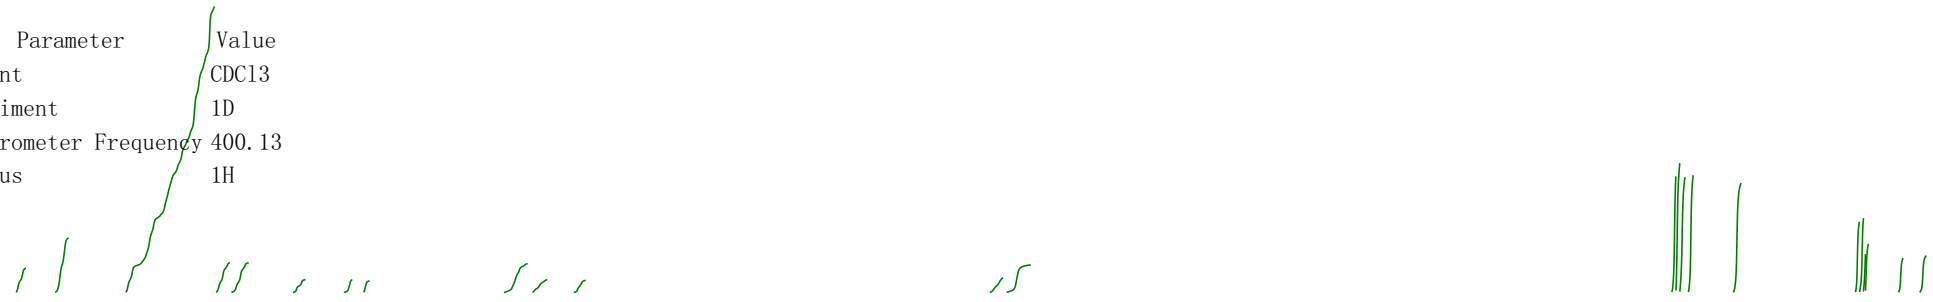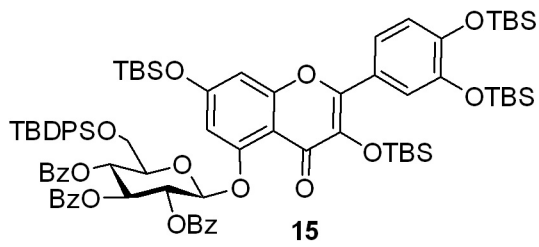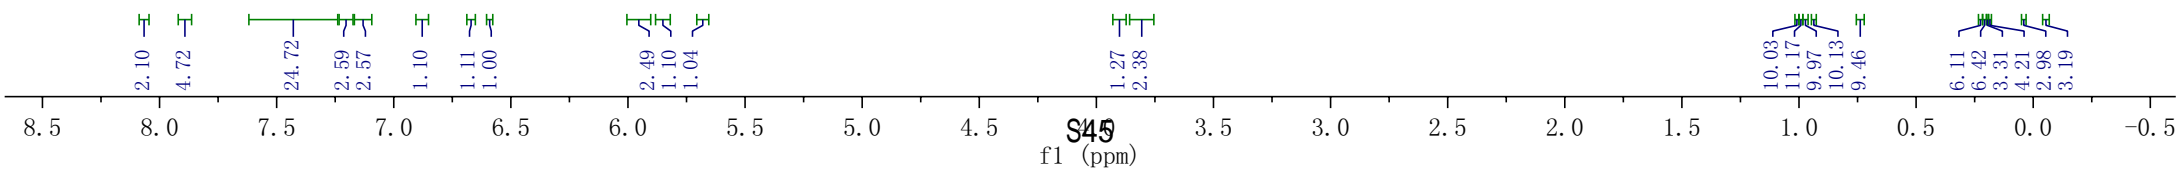

172.6408  
 165.9638  
 165.2497  
 164.8952  
 159.3881  
 157.6158  
 156.4546  
 149.5288  
 148.5895  
 146.5905  
 135.5538  
 135.4199  
 130.1639  
 129.8561  
 129.8149  
 129.7711  
 129.5163  
 129.4656  
 128.3149  
 128.2202  
 128.0699  
 127.6139  
 127.5329  
 123.0193  
 121.4556  
 118.8878  
 118.8878  
 109.4846  
 103.4861  
 100.1645

77.3177  
 77.2024  
 77.0003  
 77.0000  
 76.6826  
 75.2094  
 73.6011  
 72.1030  
 68.9988  
 62.2331

26.5334  
 25.9370  
 25.7539  
 25.5415  
 19.0553  
 18.6853  
 18.5607  
 18.4486  
 18.1939

-0.0220  
 -4.0806  
 -4.1124  
 -4.1471  
 -4.1793  
 -4.3450  
 -4.3703

| Parameter              | Value  |
|------------------------|--------|
| Solvent                | CDC13  |
| Experiment             | 1D     |
| Spectrometer Frequency | 100.61 |
| Nucleus                | 13C    |

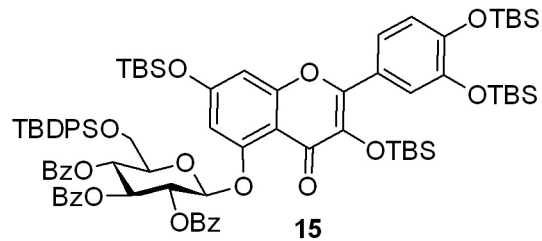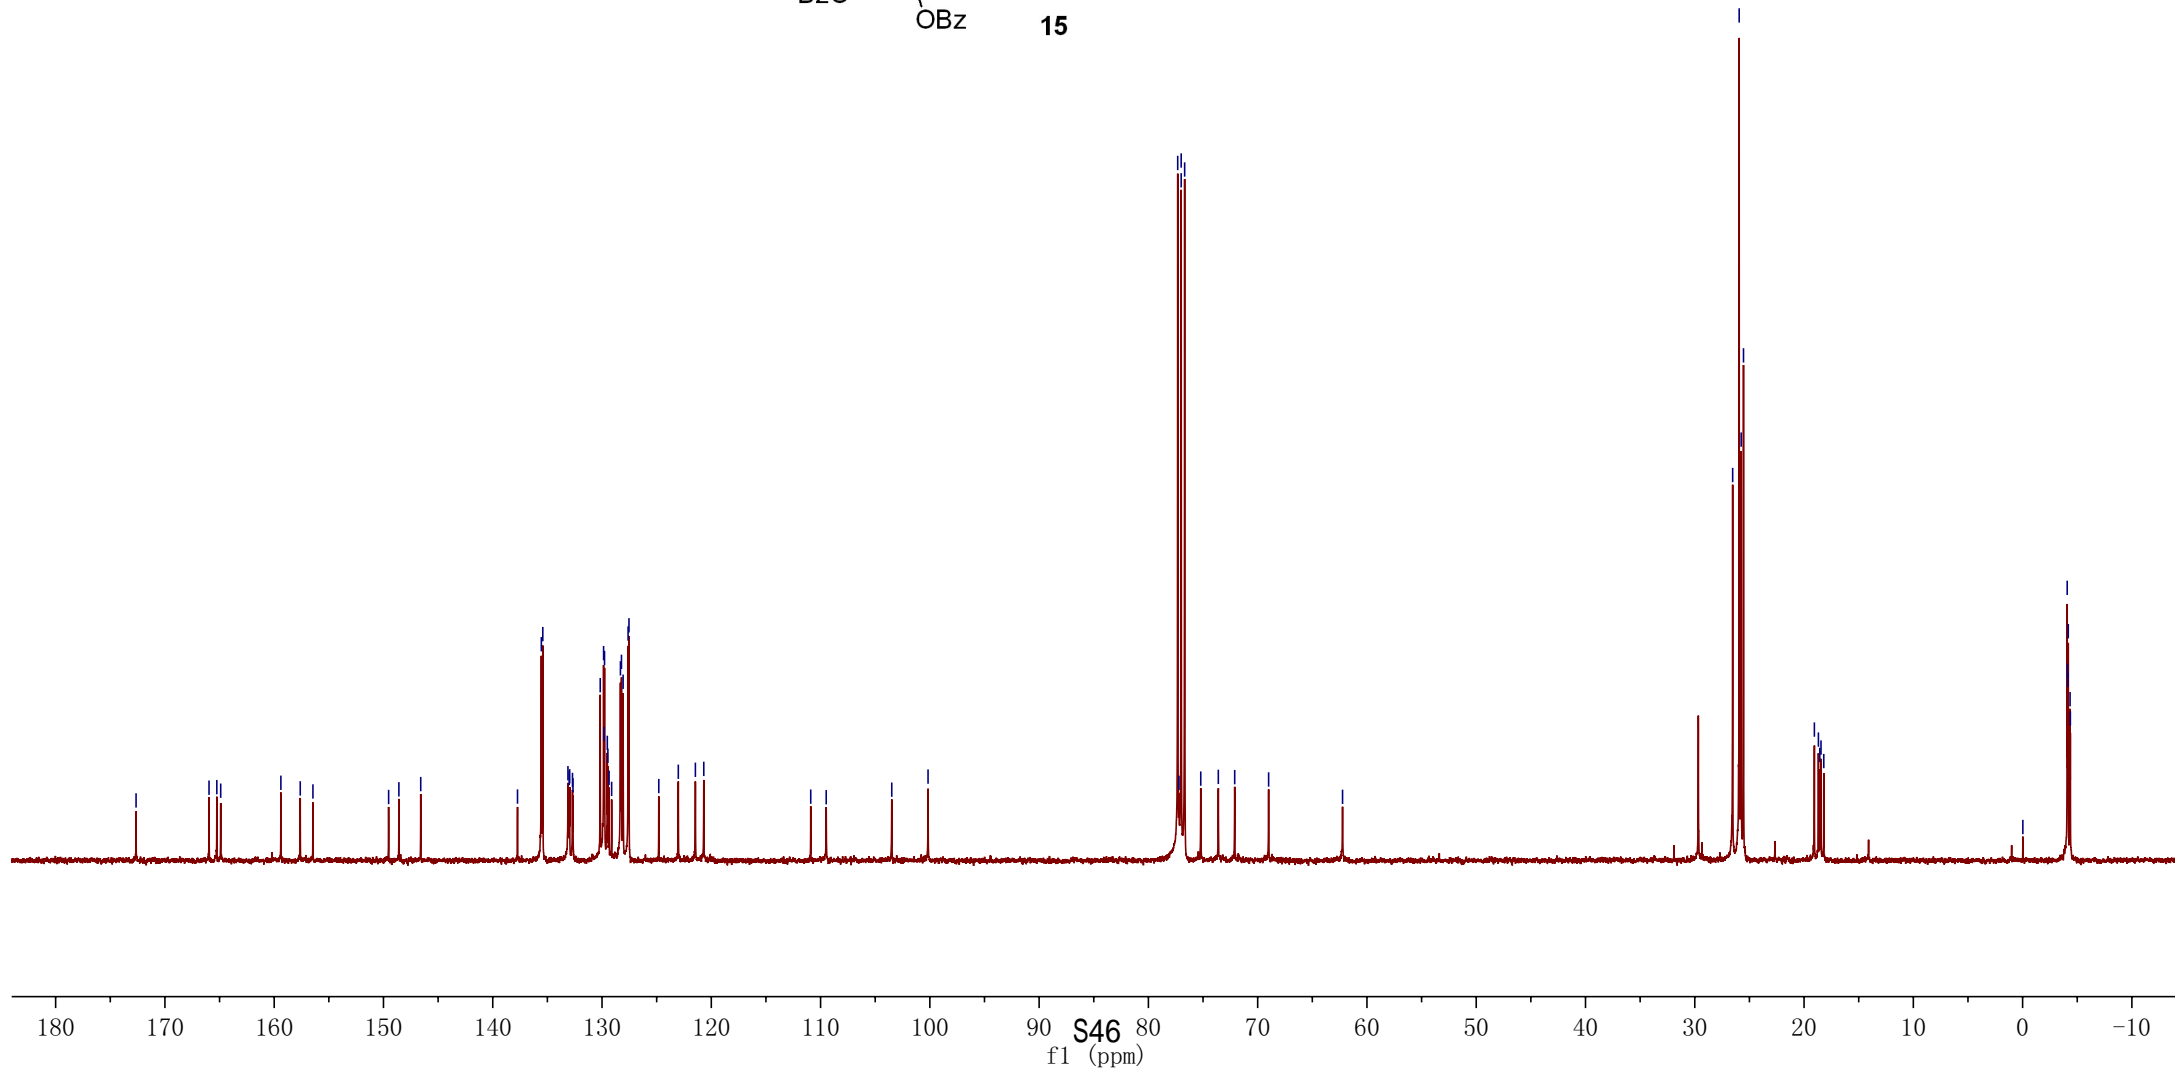

| Parameter              | Value          |
|------------------------|----------------|
| Solvent                | CDC13          |
| Experiment             | 1D             |
| Spectrometer Frequency | 400.13         |
| Nucleus                | <sup>1</sup> H |

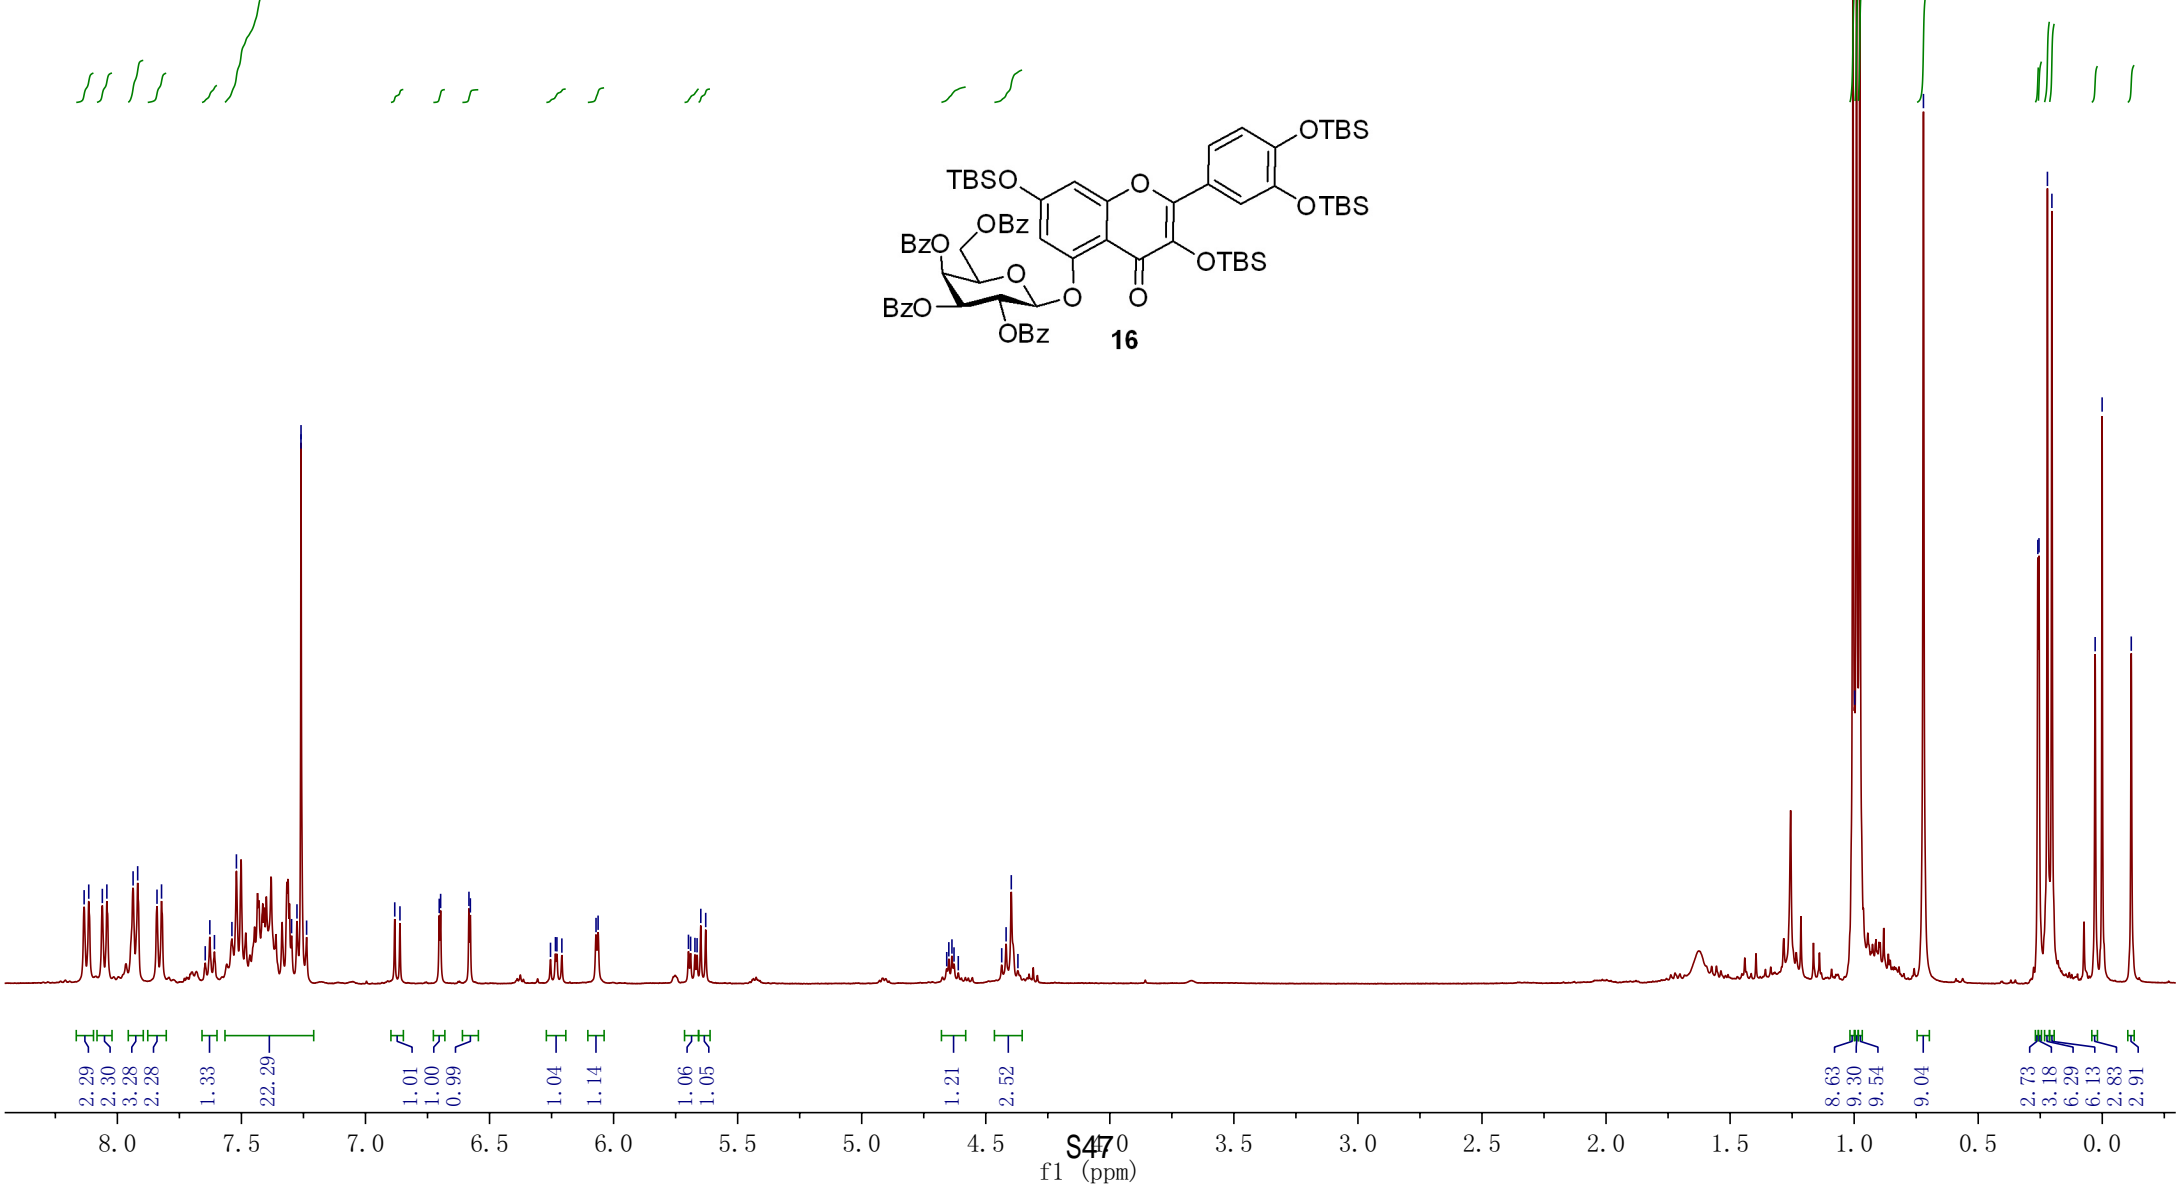

172.6131  
 165.9490  
 165.6339  
 165.3427  
 159.3708  
 157.5817  
 156.3495  
 149.6037  
 148.6226  
 146.5953  
 137.7118  
 133.2105  
 133.1775  
 130.0957  
 130.0725  
 129.8323  
 129.7848  
 129.7401  
 128.6192  
 128.3993  
 128.3582  
 128.2625  
 128.1148  
 118.8189  
 109.3012  
 103.7064  
 100.6323

77.3175  
 77.2028  
 77.0000  
 76.9996  
 76.6825  
 71.9396  
 71.5542  
 69.4833  
 67.9966  
 61.7503

25.9360  
 25.7418  
 25.5837  
 18.6650  
 18.5642  
 18.4538  
 18.2873

-4.0817  
 -4.1853  
 -4.2295  
 -4.3029  
 -4.3327

| Parameter              | Value           |
|------------------------|-----------------|
| Solvent                | CDC13           |
| Experiment             | 1D              |
| Spectrometer Frequency | 100.61          |
| Nucleus                | <sup>13</sup> C |

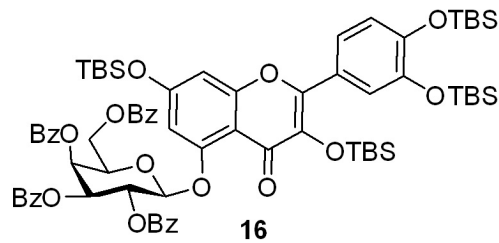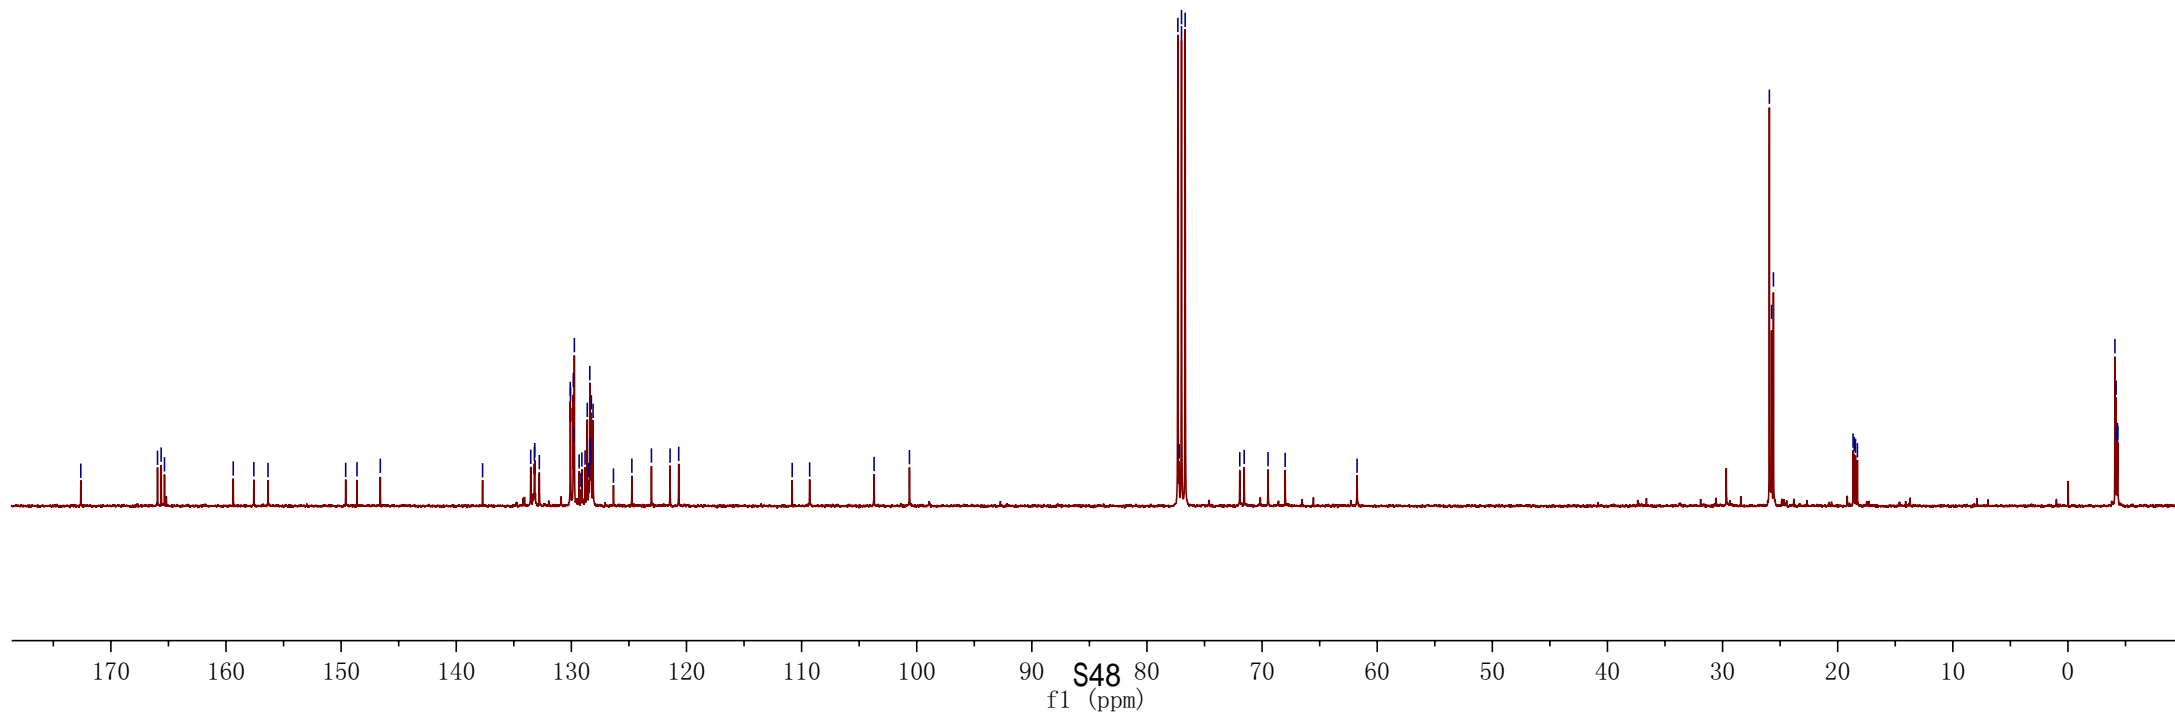



8.1682  
8.1499  
8.0439  
8.0254  
7.8809  
7.8626  
7.5328  
7.5129  
7.4063  
7.4006  
7.3802  
7.2808  
7.2603  
6.9999  
6.8964  
6.5762  
6.5712  
6.5426  
6.5377  
6.4966  
6.4882  
6.1213  
6.1169  
5.8858  
5.8064  
5.7815  
5.7565

4.5568  
4.5413  
4.5325  
4.5108

1.3271  
1.3116  
1.2593  
1.0216  
1.0073  
0.8331

0.3267  
0.2921  
0.2822  
0.2417  
0.2276  
0.0028

| Parameter              | Value          |
|------------------------|----------------|
| Solvent                | CDC13          |
| Experiment             | 1D             |
| Spectrometer Frequency | 400.13         |
| Nucleus                | <sup>1</sup> H |

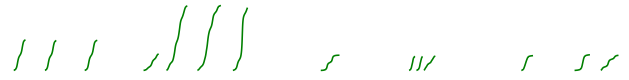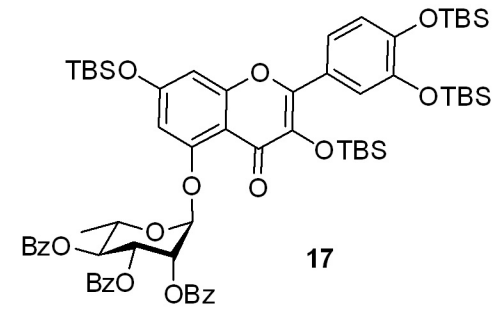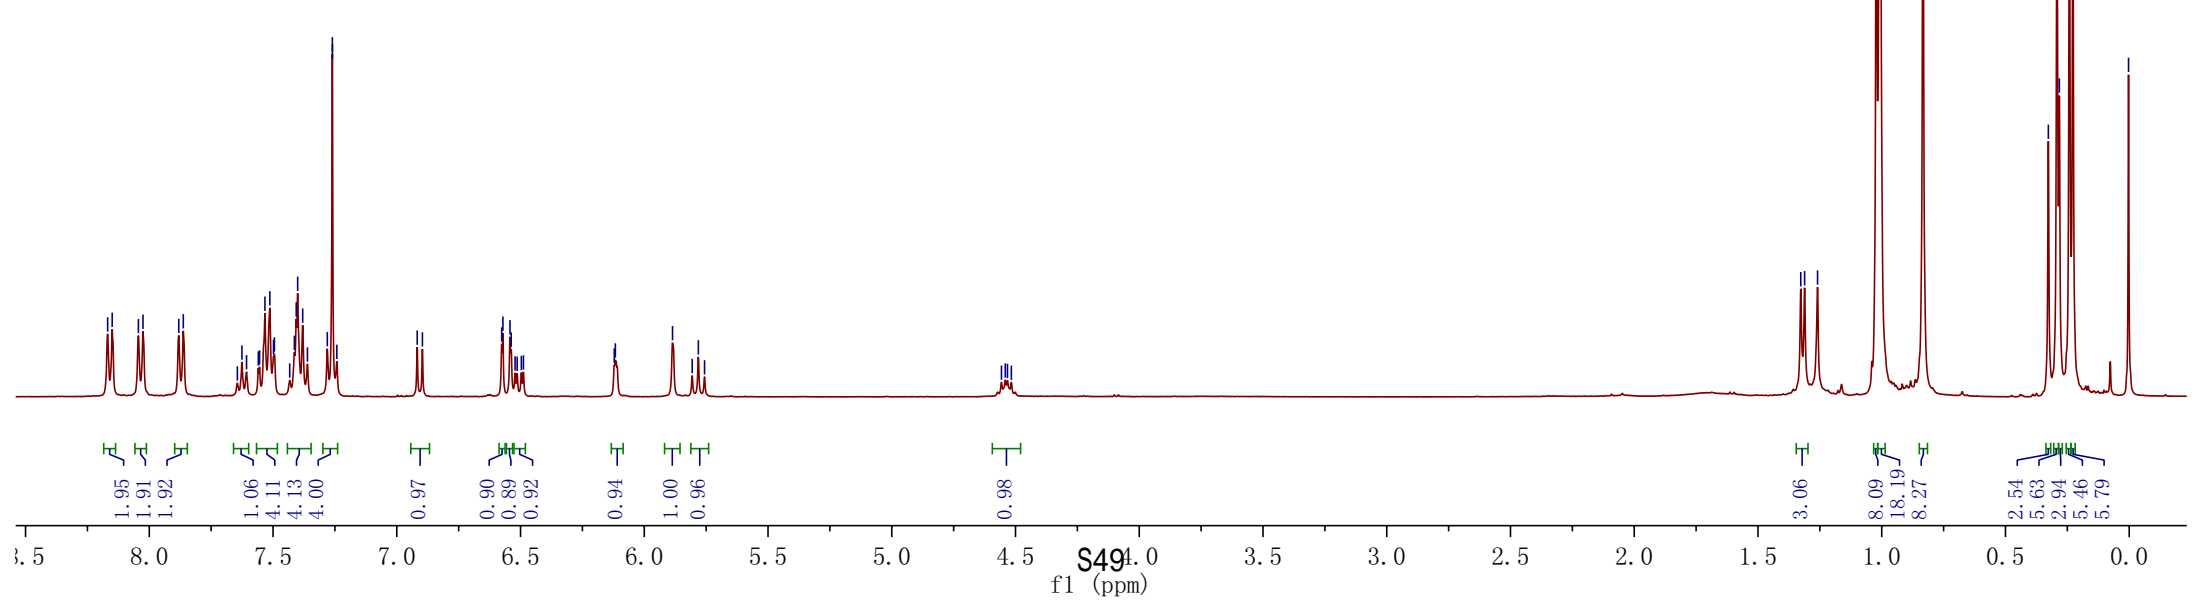

172.8146  
 165.9662  
 165.4809  
 164.9270  
 159.6899  
 157.9067  
 155.5571  
 149.2280  
 148.6012  
 146.6189

138.0285  
 133.3929  
 133.2127  
 129.9675  
 129.8904  
 129.7312  
 129.6364  
 129.4041  
 128.5575  
 128.2981  
 128.1432  
 123.0182  
 121.3423  
 119.9887  
 119.9887

105.2136  
 102.4329

96.1218

77.3169  
 77.2026  
 77.0000  
 76.9997  
 76.6818  
 72.0360  
 70.7484  
 69.6958  
 68.1949

25.9536  
 25.9359  
 25.5846  
 18.9573  
 18.5769  
 18.4747  
 18.2687  
 17.6584

-3.5395  
 -3.6239  
 -4.0554  
 -4.0738  
 -4.1633  
 -4.3062  
 -4.3613

| Parameter              | Value  |
|------------------------|--------|
| Solvent                | CDC13  |
| Experiment             | 1D     |
| Spectrometer Frequency | 100.61 |
| Nucleus                | 13C    |

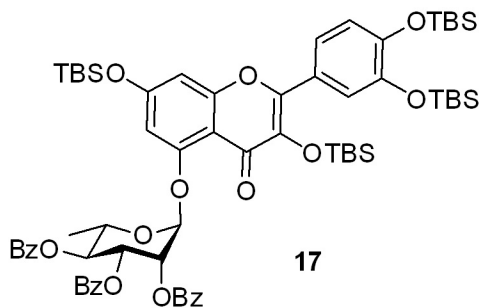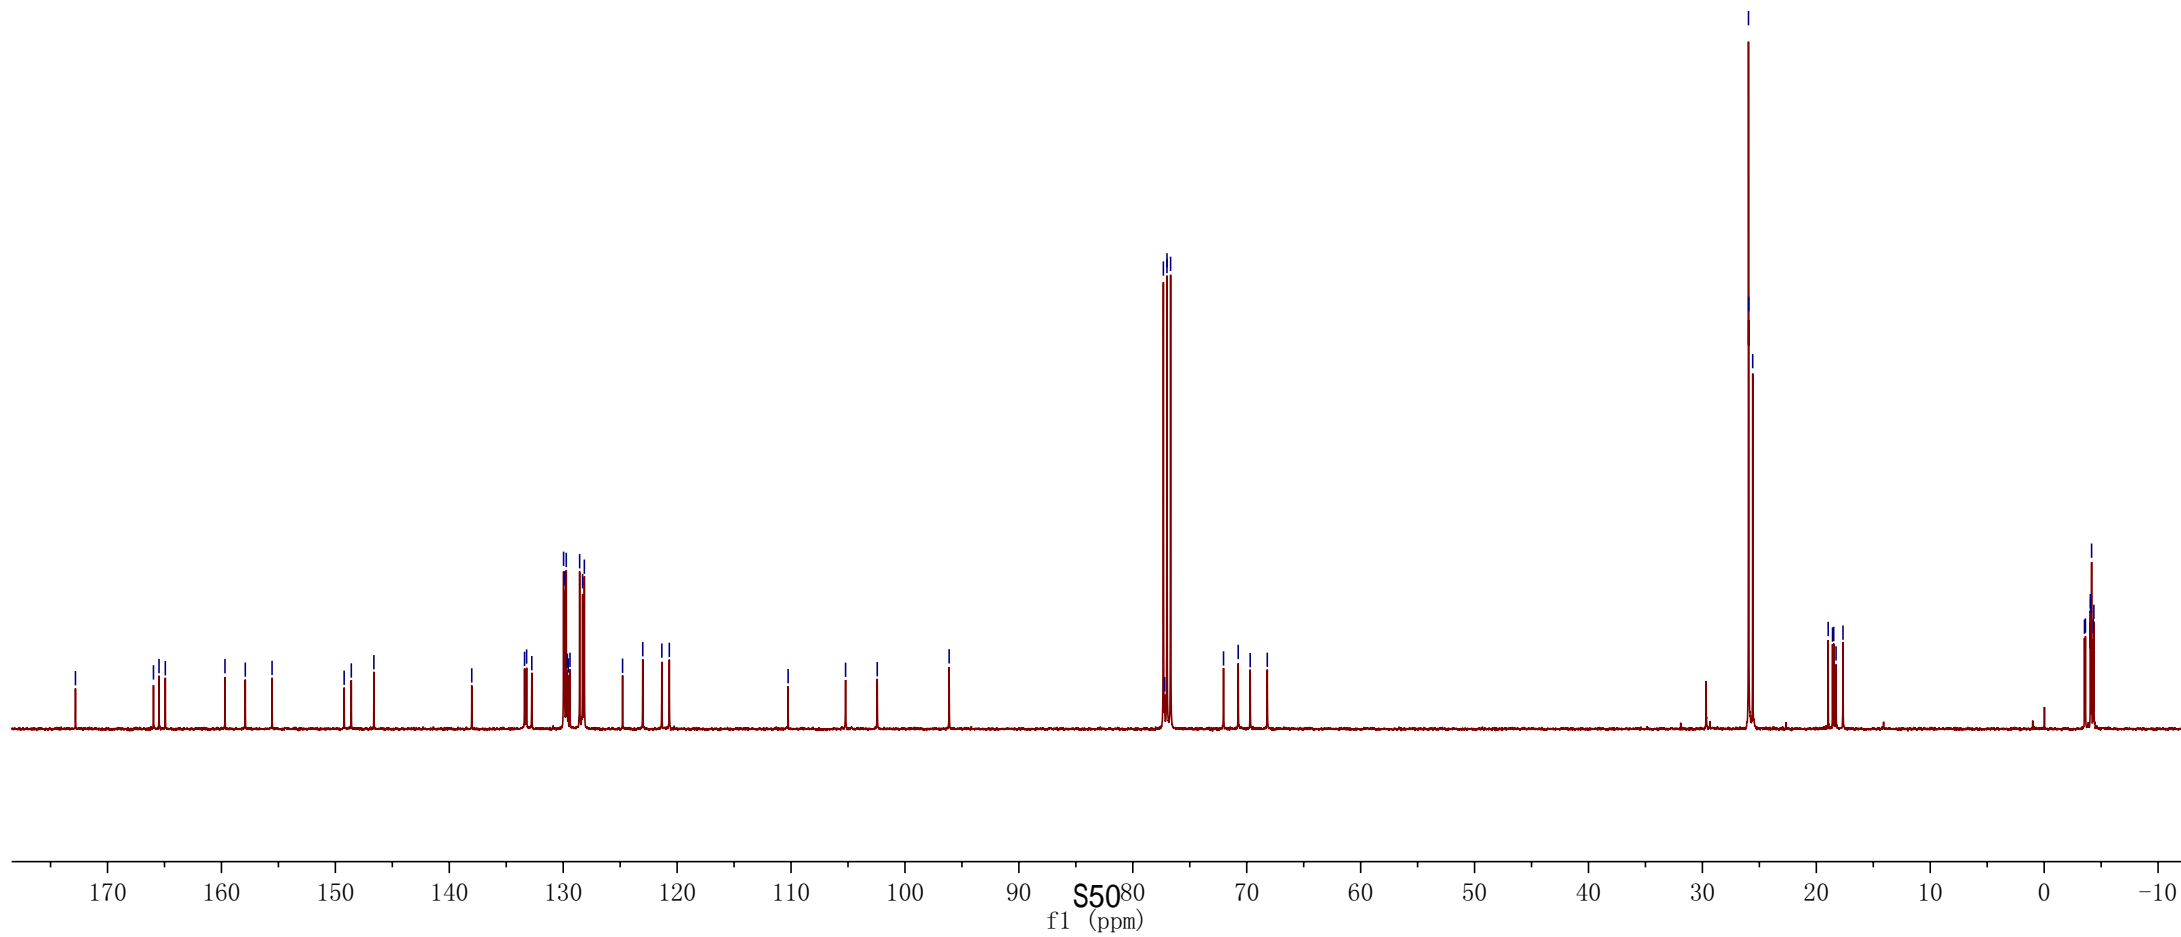

8.0882  
8.0697  
7.9840  
7.9665  
7.9494  
7.9389  
7.9344  
7.9211  
7.9107  
7.8884

7.4367  
7.3817  
7.3625  
7.2600  
7.2599  
6.9908  
6.9682  
6.8373  
6.8316  
6.6364  
6.6307

6.0687  
6.0459  
6.0232  
6.0007  
5.9829  
5.9600  
5.8603  
5.8367  
5.8133  
5.6952  
5.6775

5.1196  
5.0658  
4.7731  
4.7462  
4.7207  
4.7134  
4.6903  
4.6831  
4.6699  
4.6429  
4.5201  
4.5065  
4.4894  
4.4764  
4.3110  
4.3032  
4.2974  
4.2875  
4.2789  
4.2733  
4.2657

Parameter Value  
Solvent CDCl3  
Experiment 1D  
Spectrometer Frequency 400.13  
Nucleus 1H

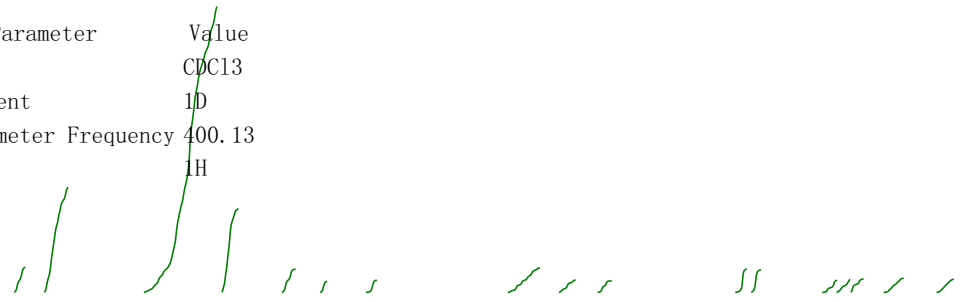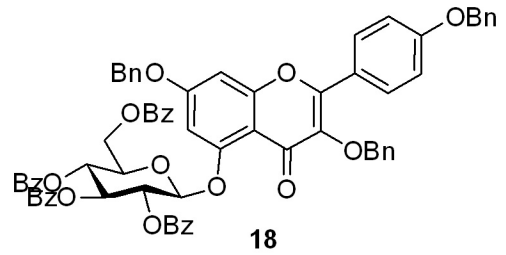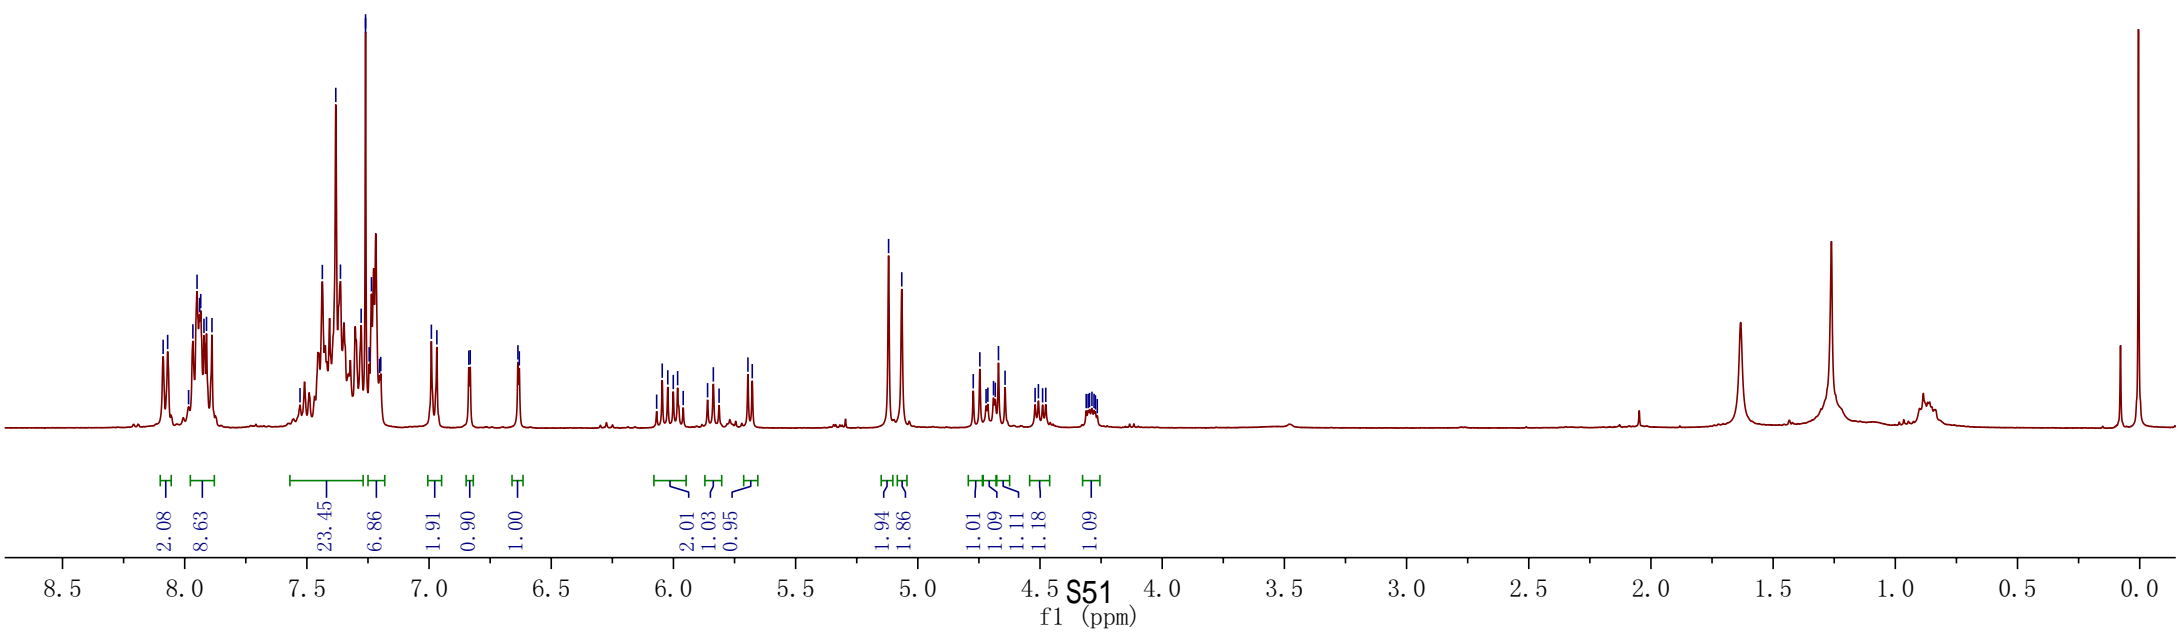

172.6858  
166.0315  
165.8040  
165.2922  
165.1604  
162.0217  
160.1797  
157.8092  
156.6317  
153.3034

130.0682  
129.8577  
129.6467  
128.7536  
128.6718  
128.6001  
128.3669  
128.2885  
128.2508  
128.2220  
128.0328  
128.0006  
127.4377  
127.4152  
123.3898

114.4864  
111.0033

104.6963  
100.1622  
97.5793

77.3179  
77.2031  
77.0005  
77.0000  
76.6825  
73.3438  
72.8450  
72.6479  
71.8363  
70.4157  
69.9753  
69.4927  
62.8530

| Parameter              | Value           |
|------------------------|-----------------|
| Solvent                | CDC13           |
| Experiment             | 1D              |
| Spectrometer Frequency | 100.61          |
| Nucleus                | <sup>13</sup> C |

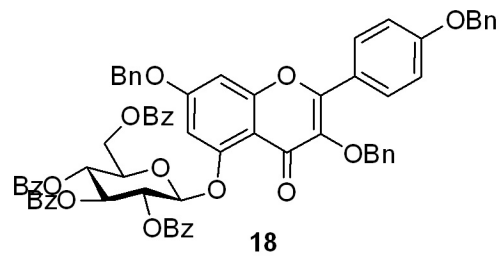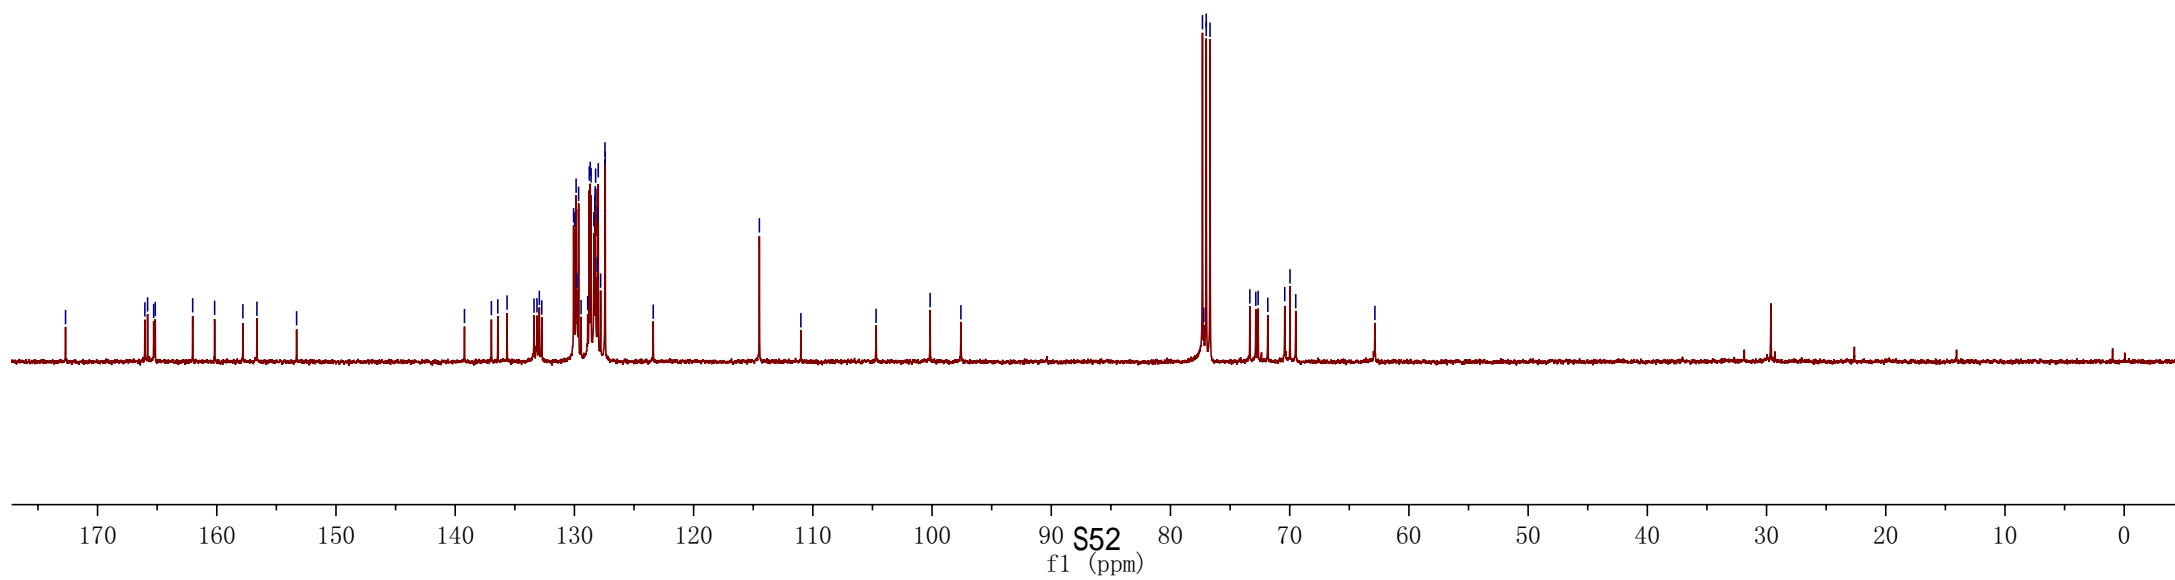

8.0903  
8.0716  
7.9319  
7.9113  
7.8924  
7.8723  
7.6521  
7.6337  
7.5602  
7.5422  
7.4378  
7.4276  
7.2600  
7.1707  
7.1516  
6.9943  
6.9731  
6.7087

6.0163  
5.9949  
5.9874  
5.9756  
5.9516  
5.8099  
5.7996  
5.7862  
5.7631  
5.6507  
5.6420  
5.6337  
5.1208  
5.0152  
4.7463  
4.7196  
4.6236  
4.5968

3.9854  
3.9610  
3.8924  
3.8630  
3.8501  
3.8181

0.9669

| Parameter              | Value  |
|------------------------|--------|
| Solvent                | CDC13  |
| Experiment             | 1D     |
| Spectrometer Frequency | 400.13 |
| Nucleus                | 1H     |

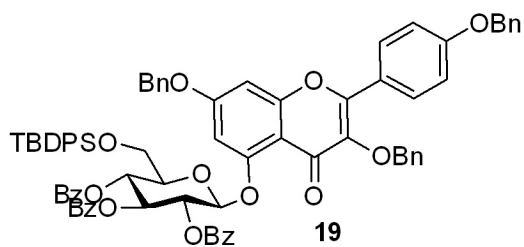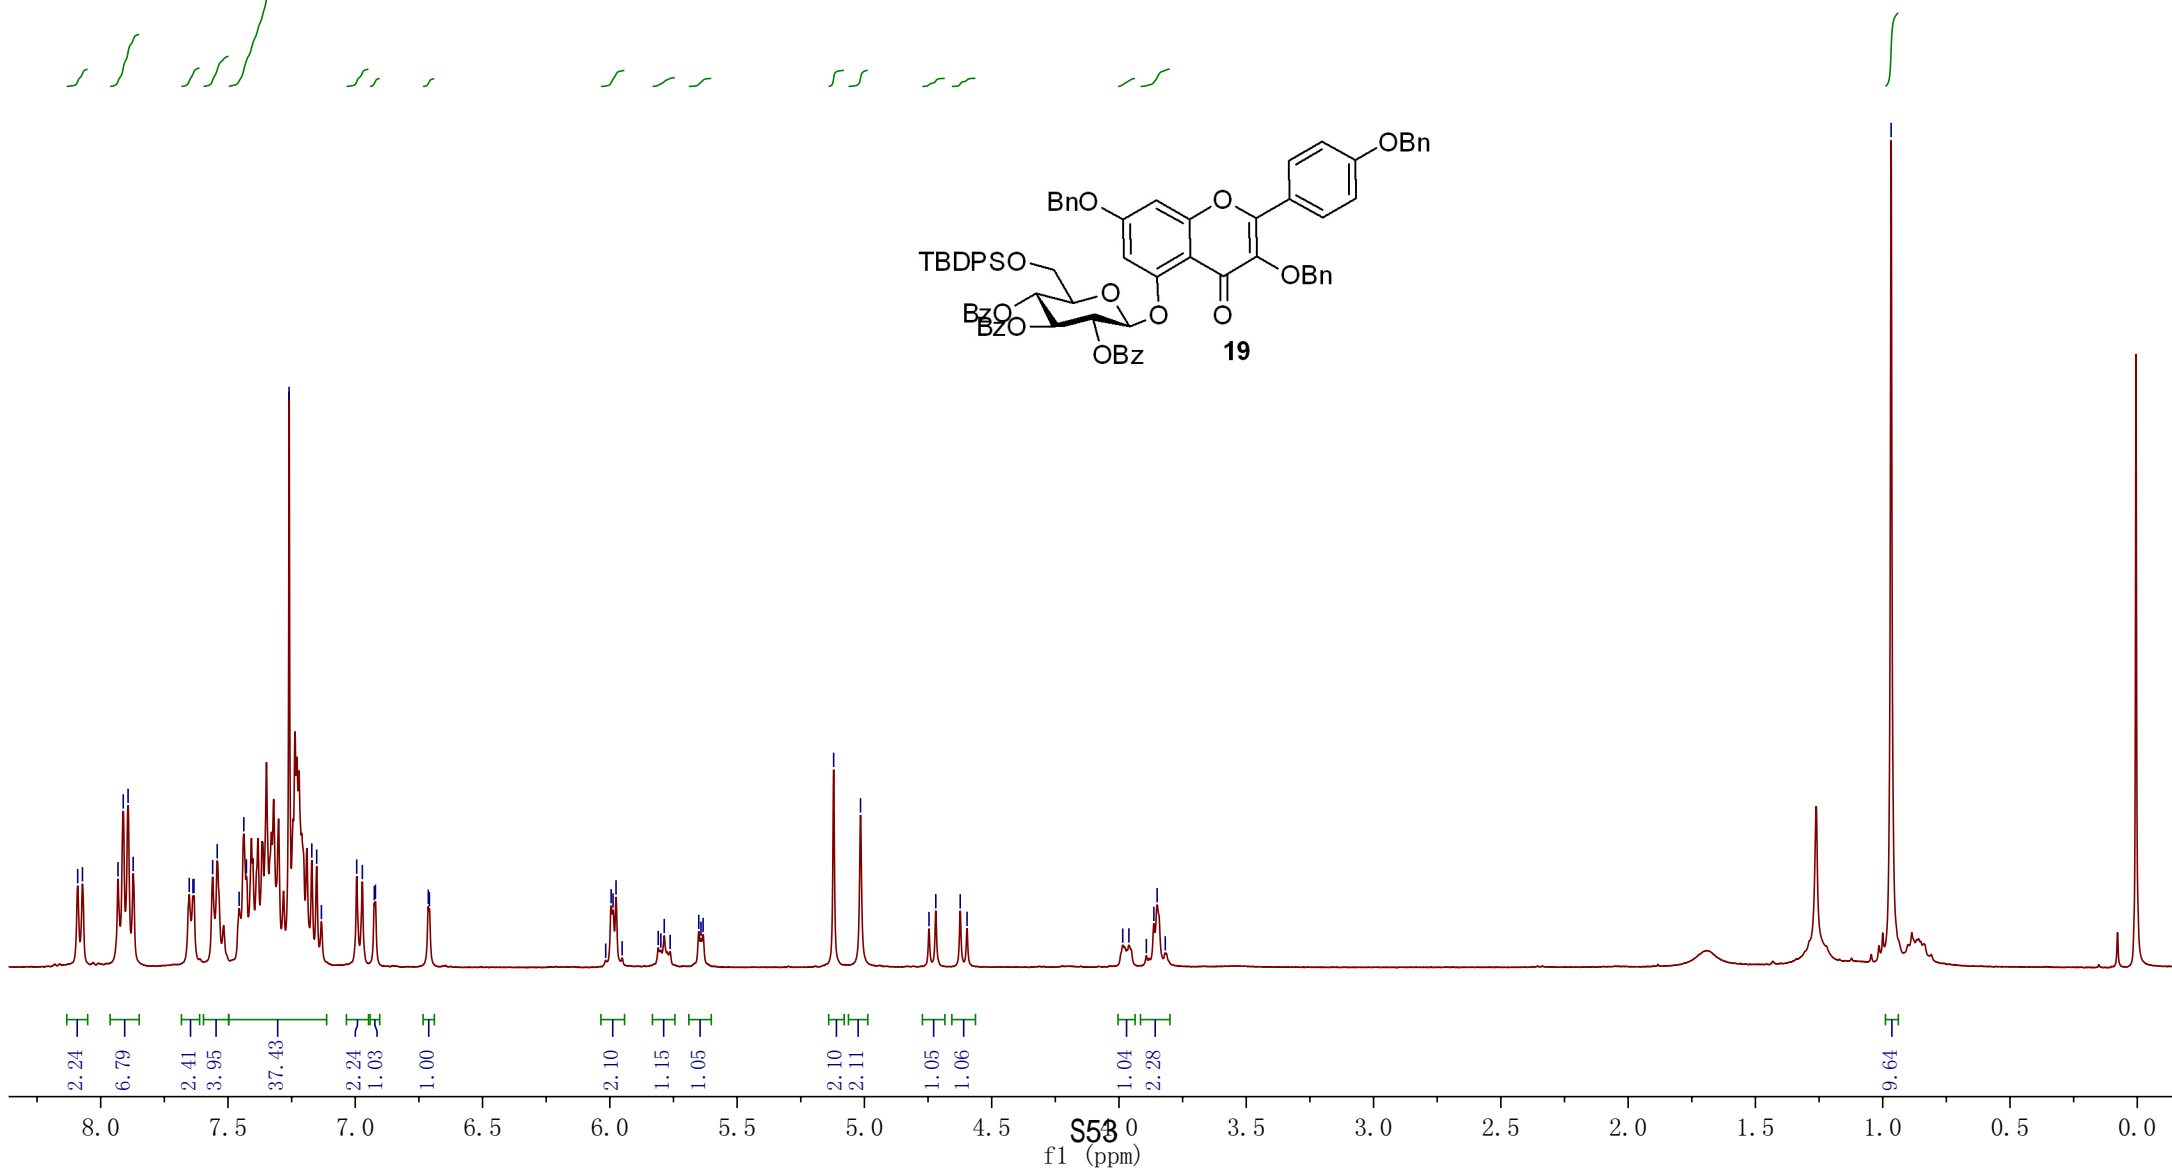

172.6515  
165.9300  
165.3902  
164.9474  
162.1567  
160.1708  
157.9617  
157.1163  
153.2009

135.5491  
135.4379  
130.0754  
130.0160  
129.8840  
129.7734  
128.7817  
128.6409  
128.3205  
128.2284  
128.0191  
127.9736  
127.6196  
127.5913  
127.4456  
123.4896

114.5119  
111.2304  
105.3417  
100.7454  
97.2017

77.3182  
77.2034  
77.0001  
77.0000  
76.6830  
75.5003  
73.3393  
73.3033  
71.8981  
70.4399  
70.0113  
69.0747  
62.5409

26.5140  
19.0259

| Parameter              | Value           |
|------------------------|-----------------|
| Solvent                | CDC13           |
| Experiment             | 1D              |
| Spectrometer Frequency | 100.61          |
| Nucleus                | <sup>13</sup> C |

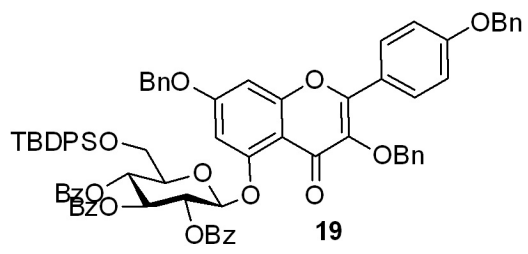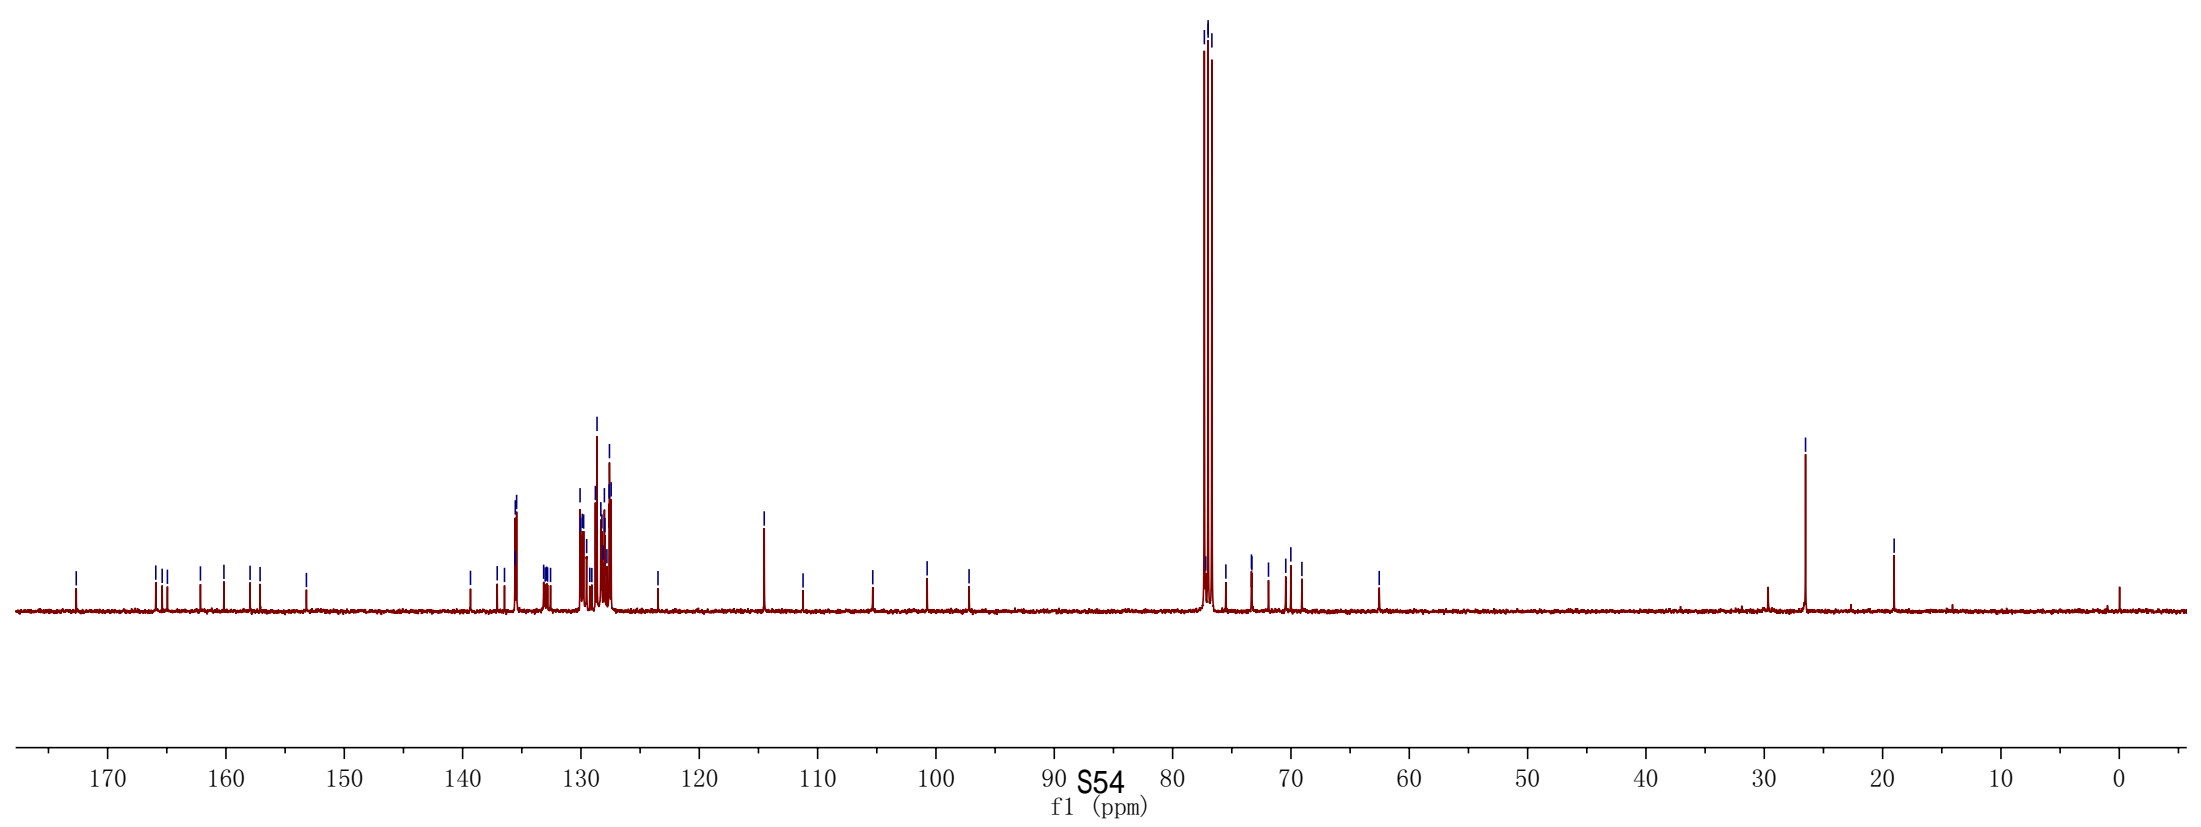

8.1462  
8.1280  
8.0541  
8.0358  
7.9982  
7.9800  
7.9097  
7.8874  
7.8622  
7.8439  
7.6229  
7.6043  
7.5889  
7.5800  
7.1429  
6.9819  
6.9594  
6.9521  
6.9464  
6.6820  
6.6763  
6.3406  
6.3205  
6.3148  
6.2947  
6.0864  
6.0791  
5.7424  
5.7340  
5.7163  
5.7078  
5.6010  
5.5811  
5.1117  
5.0868  
4.7073  
4.6903  
4.6794  
4.6626  
4.6256  
4.5989  
4.5624  
4.5363  
4.5236  
4.5102  
4.4956  
4.4799  
4.4637  
4.4488

Parameter Value  
Solvent CDC13  
Experiment 1D  
Spectrometer Frequency 400.13  
Nucleus 1H

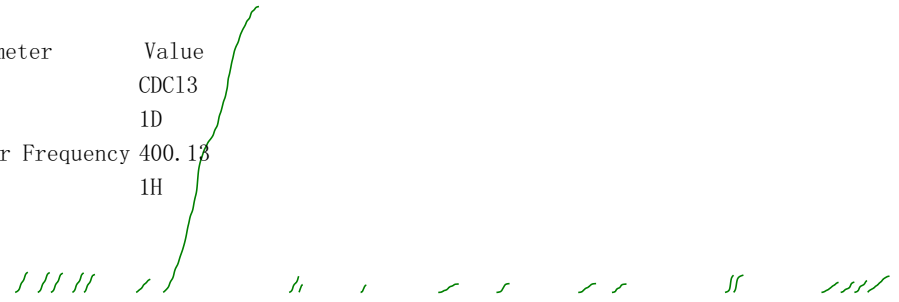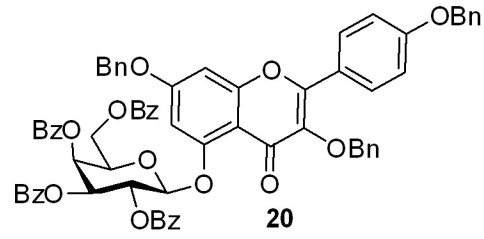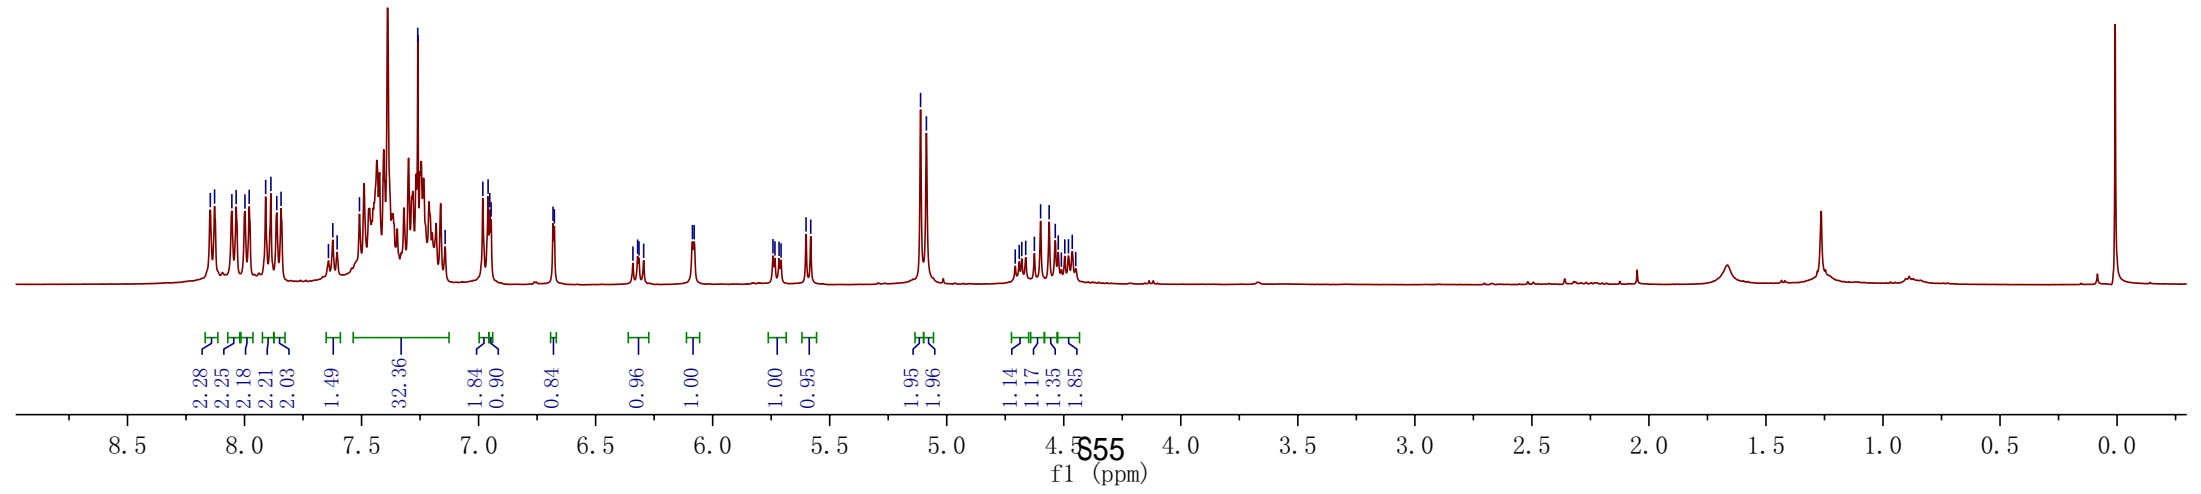

172.5536  
 166.0108  
 165.6068  
 165.4217  
 162.0846  
 160.1461  
 157.8746  
 157.2657  
 153.1796  
 130.0445  
 130.0175  
 129.8698  
 129.8199  
 129.6827  
 128.7320  
 128.7125  
 128.6007  
 128.3188  
 128.2583  
 128.0947  
 127.9667  
 127.4368  
 127.4173  
 123.3676

114.4693  
 110.9876  
 104.5836  
 101.3110  
 97.2641

77.3170  
 77.2027  
 77.0000  
 76.9999  
 76.6816  
 73.2424  
 71.9124  
 71.7063  
 70.4488  
 69.9582  
 69.1937  
 68.1061  
 62.3529

| Parameter              | Value             |
|------------------------|-------------------|
| Solvent                | CDCl <sub>3</sub> |
| Experiment             | 1D                |
| Spectrometer Frequency | 100.61            |
| Nucleus                | <sup>13</sup> C   |

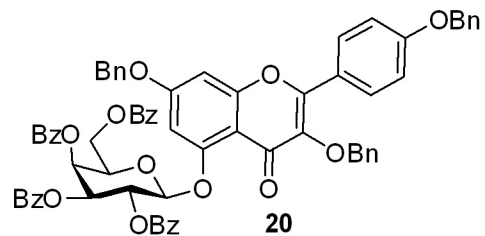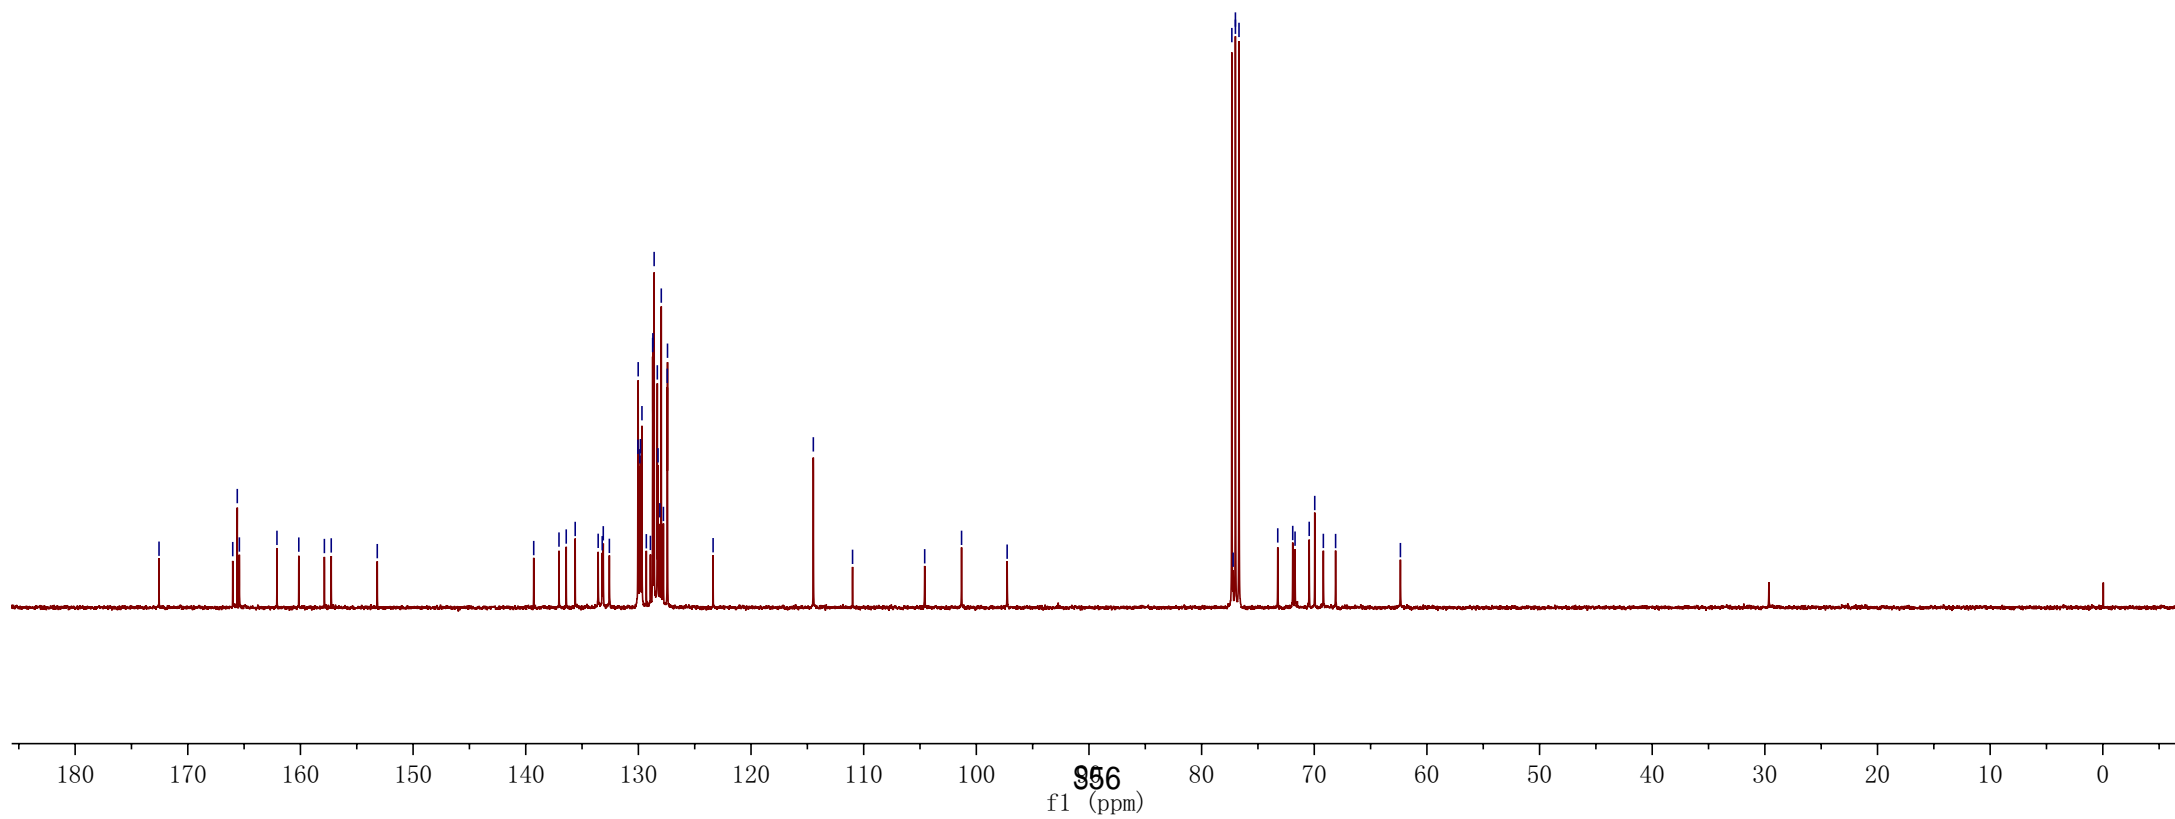



| Parameter              | Value  |
|------------------------|--------|
| Solvent                | CDCl3  |
| Experiment             | 1D     |
| Spectrometer Frequency | 400.13 |
| Nucleus                | 1H     |

8.1685  
8.1497  
8.0511  
8.0324  
7.9966  
7.9757  
7.8927  
7.8739  
7.6262  
7.6087  
7.5368  
7.2900  
7.2600  
7.0345  
7.0134  
6.8050  
6.7237  
6.4219  
6.3962  
6.1351  
5.9193  
5.8401  
5.8155  
5.7907  
5.2169  
5.1901  
5.1643  
5.1492  
5.1286  
5.1015  
4.6141  
4.5990  
4.5753  
1.3644  
1.3497

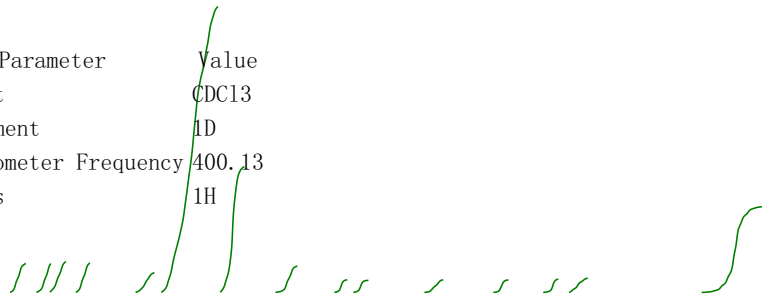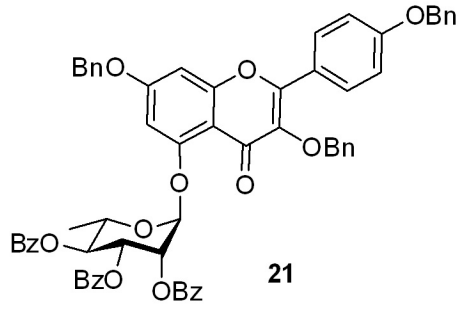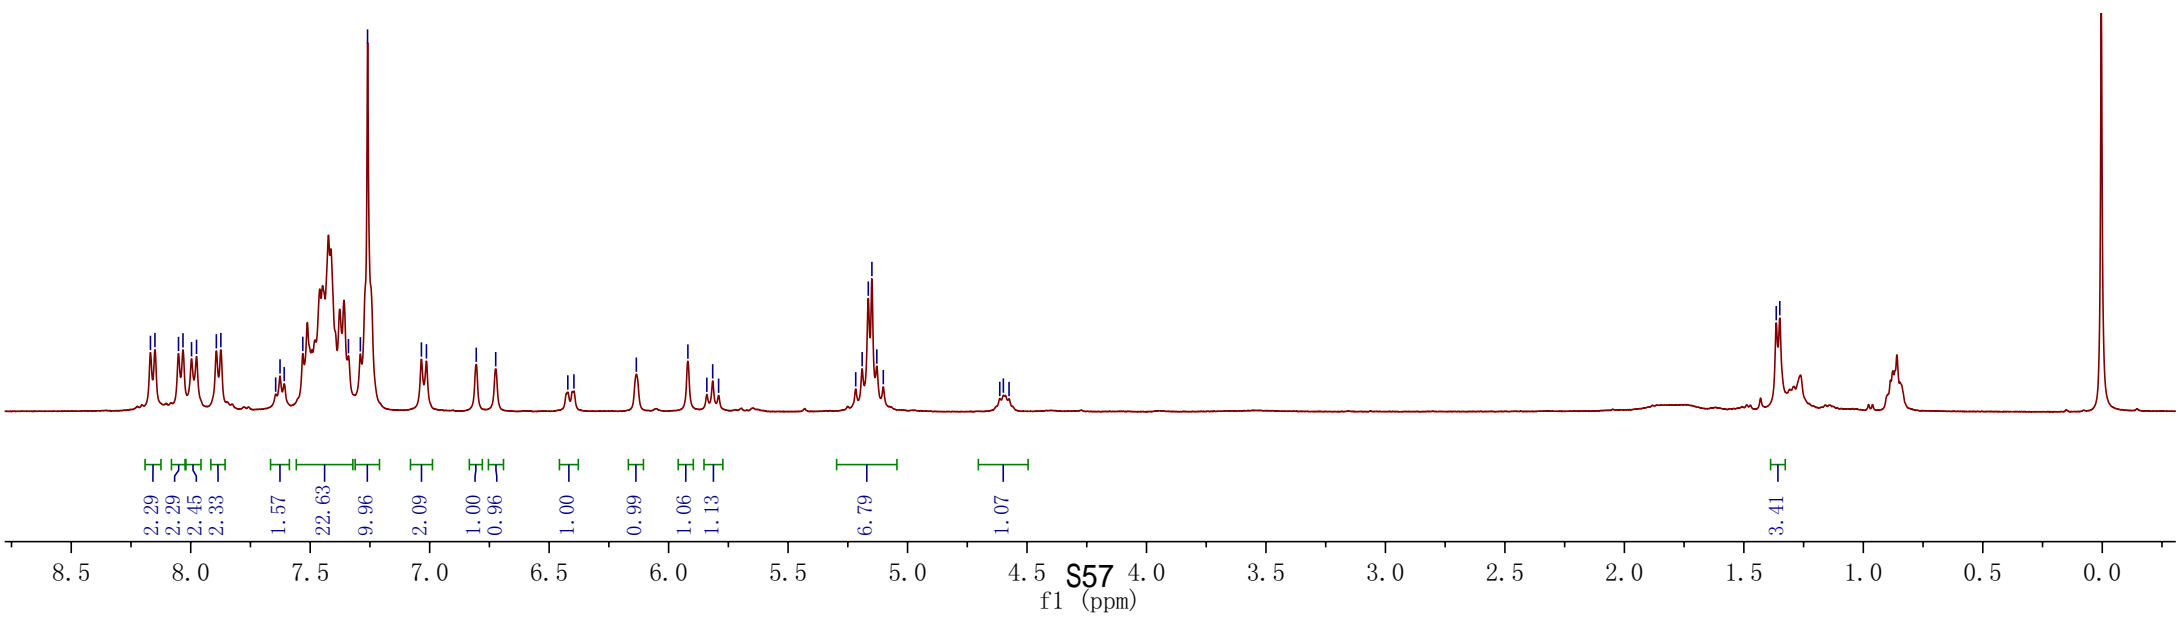

— 173.2490  
 — 165.9896  
 — 165.5460  
 — 165.1921  
 — 162.4278  
 — 160.2437  
 — 158.4089  
 — 156.2124  
 — 153.7032  
 — 130.2217  
 — 129.9701  
 — 129.8728  
 — 129.7359  
 — 129.1104  
 — 128.7221  
 — 128.6473  
 — 128.5784  
 — 128.3682  
 — 128.1884  
 — 128.1091  
 — 127.8918  
 — 127.5172  
 — 127.4614  
 — 123.5886  
 — 114.5598  
 — 110.7163  
 — 101.3711  
 — 96.6392  
 — 96.4740  
 — 77.3182  
 — 77.2034  
 — 77.0004  
 — 77.0000  
 — 76.6831  
 — 74.0297  
 — 71.8627  
 — 70.7021  
 — 70.5372  
 — 70.0379  
 — 69.8743  
 — 68.3537  
 — 17.7350  
 — 0.0331

| Parameter              | Value  |
|------------------------|--------|
| Solvent                | CDC13  |
| Experiment             | 1D     |
| Spectrometer Frequency | 100.61 |
| Nucleus                | 13C    |

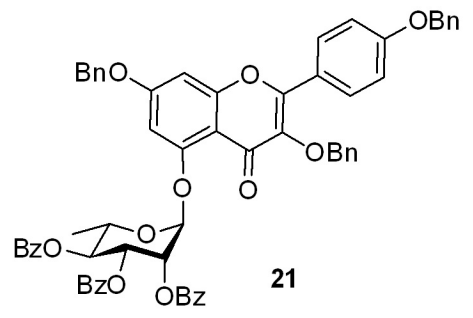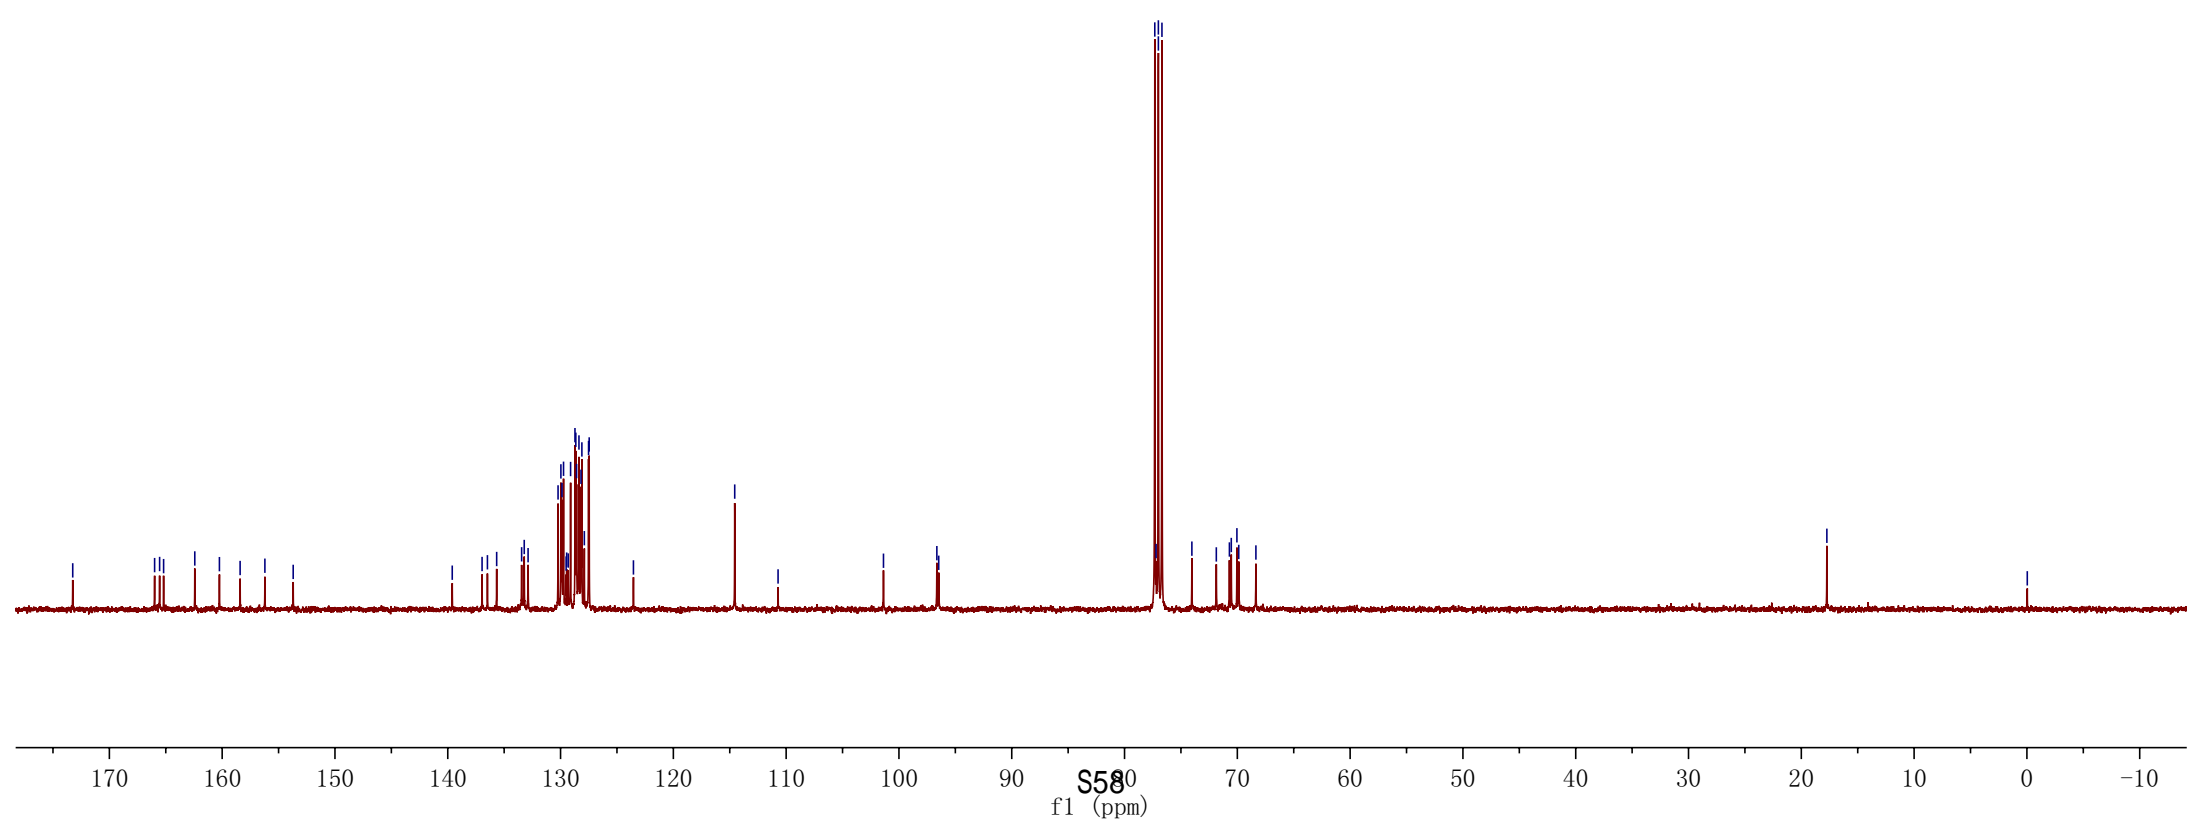

8.0111  
 7.9931  
 7.9899  
 7.9817  
 7.9636  
 7.9606  
 7.9385  
 7.9202  
 7.9014  
 7.8984  
 7.7930  
 7.7730  
 7.5410  
 7.4321  
 7.4037  
 7.2961  
 7.2601  
 7.2600  
 7.2099  
 7.1880  
 7.0858  
 7.0806  
 6.9803  
 6.9648  
 6.9595

Parameter Value  
 Solvent CDC13  
 Experiment 1D  
 Spectrometer Frequency 400.13  
 Nucleus 1H

6.0286  
 6.0060  
 5.9833  
 5.9452  
 5.9275  
 5.9230  
 5.9049  
 5.8234  
 5.7998  
 5.7766  
 5.6388  
 5.6211

4.7266  
 4.7189  
 4.6961  
 4.6887  
 4.4966  
 4.4828  
 4.4660  
 4.4525  
 4.3313  
 4.2863

2.5972  
 2.5786  
 2.5597  
 2.4563  
 2.4087

1.7882  
 1.5972  
 1.4326  
 1.2805  
 1.2558

0.9549  
 0.8852

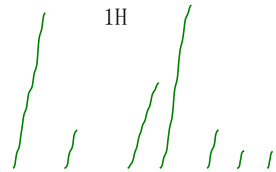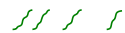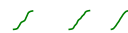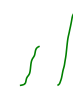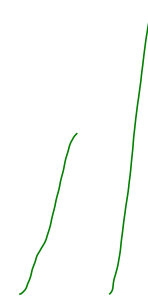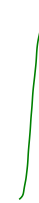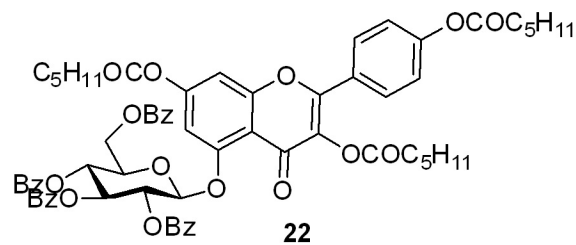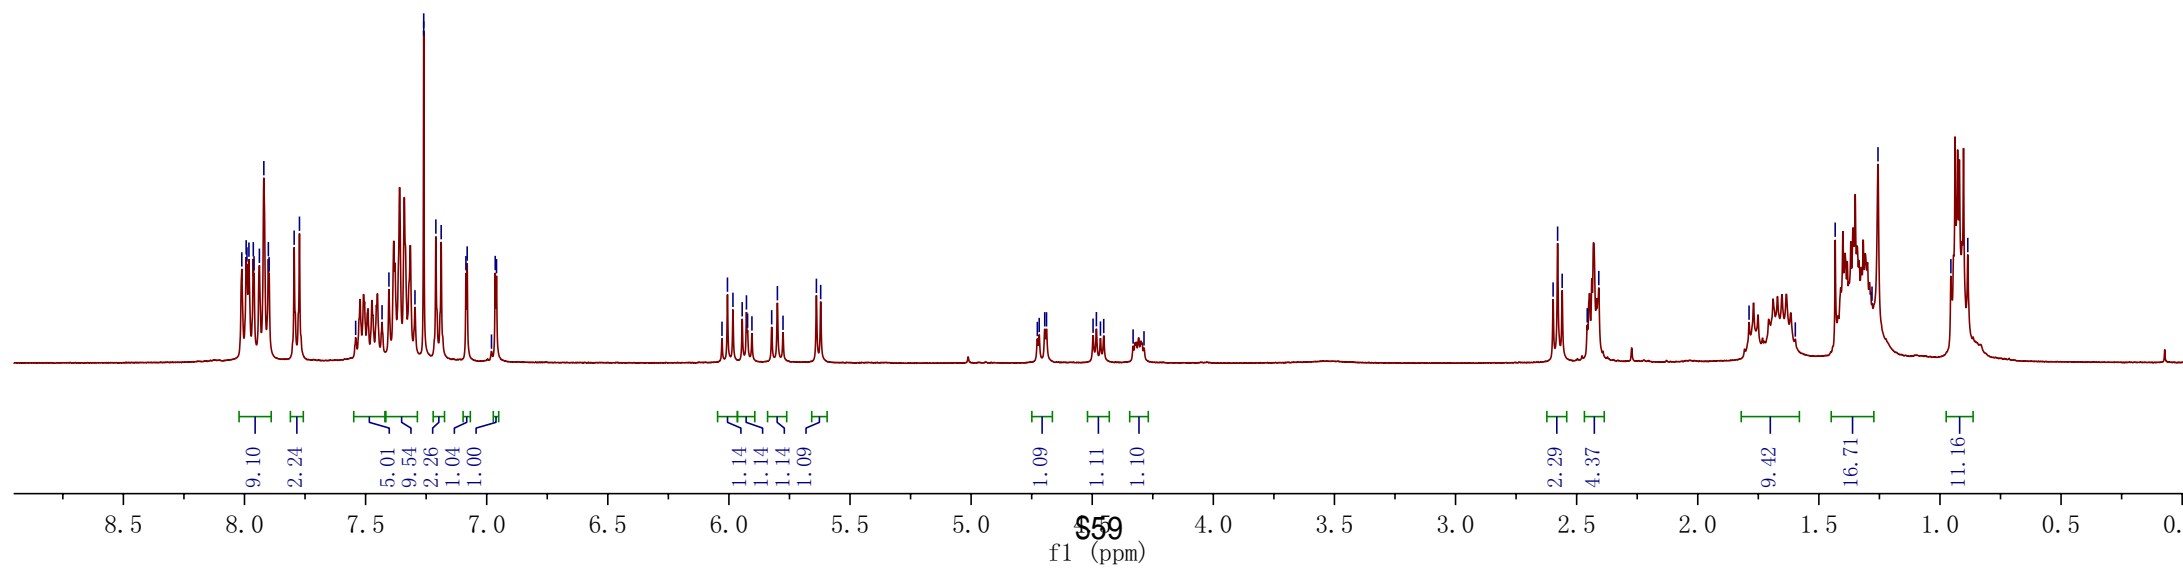

171.7411  
170.9494  
170.4085  
169.3605  
165.9845  
165.7500  
165.2762  
165.1392  
157.1188  
156.5234  
154.1883  
153.2690  
152.7383

133.4165  
133.1589  
132.9809  
132.7188  
129.9807  
129.9142  
129.8771  
129.7220  
129.5491  
129.4111  
128.3936  
128.3067  
128.2686  
128.0244  
127.8251

113.7952  
109.5280  
106.5482  
100.0287

77.3168  
77.0000  
76.9996  
76.6816  
72.6642  
71.6855  
69.4073  
62.9365

34.3467  
34.2305  
33.7047  
31.2139  
31.1391  
24.5151  
24.2846  
24.2531  
22.2655  
13.8658

Parameter Value  
Solvent CDC13  
Experiment 1D  
Spectrometer Frequency 100.61  
Nucleus 13C

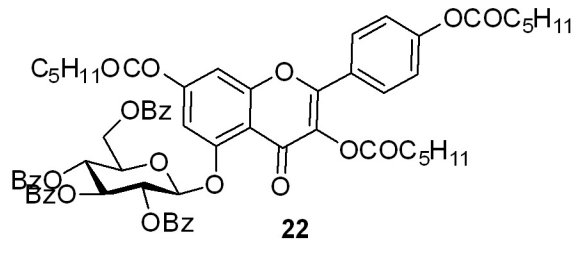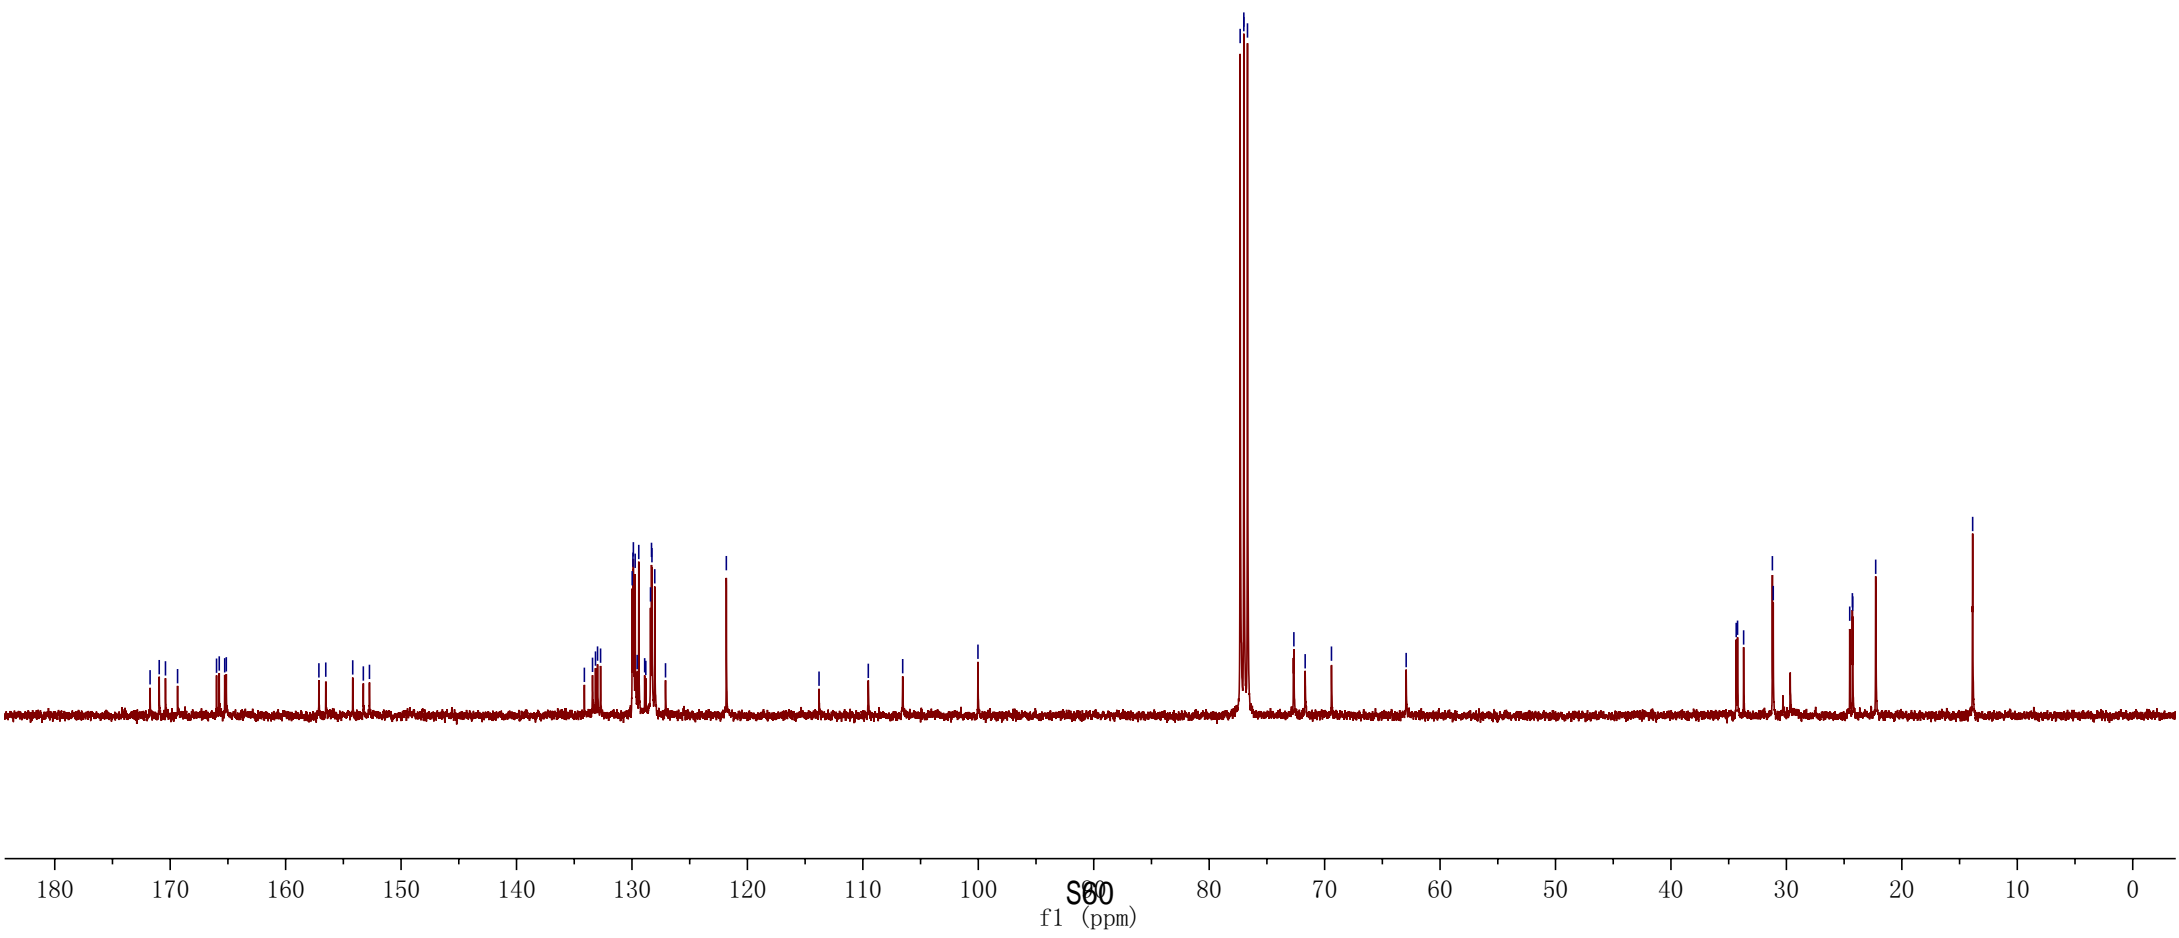

7.9993  
7.9813  
7.9783  
7.9028  
7.8852  
7.8677  
7.8648  
7.8099  
7.7879  
7.6470  
7.6303  
7.6272  
7.5674  
7.5504  
7.2600  
7.1973  
7.1921  
7.1790  
7.1568  
7.1513

5.9528  
5.9435  
5.9387  
5.9326  
5.7800  
5.7749  
5.7684  
5.7562  
5.7440  
5.7327  
5.6073  
5.5891

4.0523  
4.0458  
4.0352  
4.0284  
4.0216  
4.0110  
3.8964  
3.8850  
3.8668  
3.8546  
3.8476  
3.8241  
3.8180

2.5995  
2.5809  
2.5621  
2.4630  
2.4593  
2.4436  
2.4240  
2.4046  
1.8099  
1.7914  
1.7543  
1.7359  
1.7047  
1.6869  
1.6001  
1.4243  
1.2985  
1.2875  
1.2606  
1.0155  
0.9579  
0.8936  
0.8850  
0.8577

Parameter Value  
Solvent CDCl3  
Experiment 1D  
Spectrometer Frequency 400.13  
Nucleus 1H

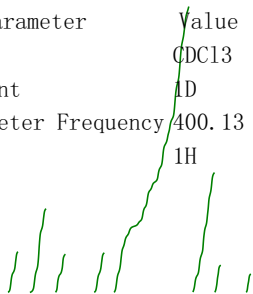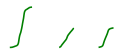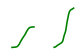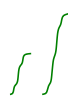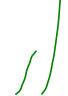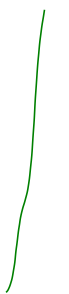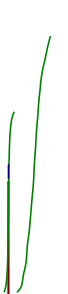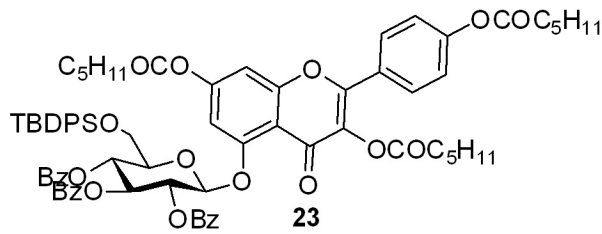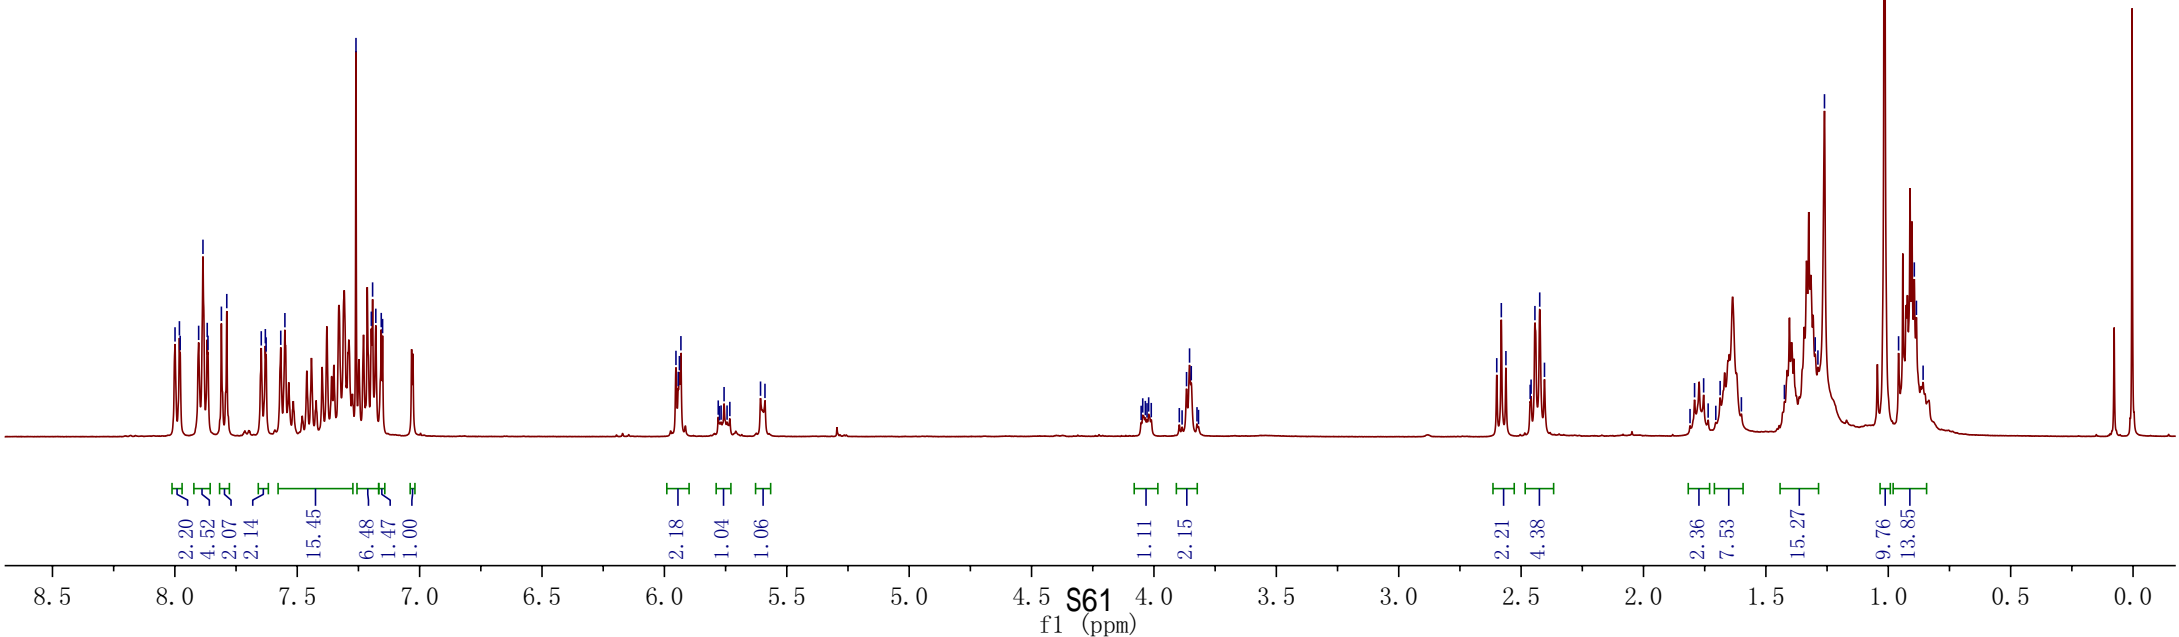

171.7372  
170.9245  
170.4021  
169.3550  
165.8678  
165.3581  
164.9009

157.1500  
157.0941  
154.2566  
153.2461  
152.7201

135.5069  
135.4255  
133.1733  
132.8061  
132.5472  
130.0146  
129.9336  
129.8896  
129.7602  
129.5575  
129.4065  
128.3171  
128.2165  
127.9509  
127.8764  
127.8704

113.7688  
109.2646  
106.4542  
100.5093

77.3185  
77.2034  
77.0004  
77.0000  
76.6829  
75.6124  
73.1390  
71.7322  
68.8659  
62.5137

34.3365  
34.2602  
33.6914  
31.2201  
31.1980  
31.1163  
26.5986  
24.5040  
24.2421  
22.2582  
22.2117  
19.0712  
13.8799  
13.8522  
13.8300

| Parameter              | Value           |
|------------------------|-----------------|
| Solvent                | CDC13           |
| Experiment             | 1D              |
| Spectrometer Frequency | 100.61          |
| Nucleus                | <sup>13</sup> C |

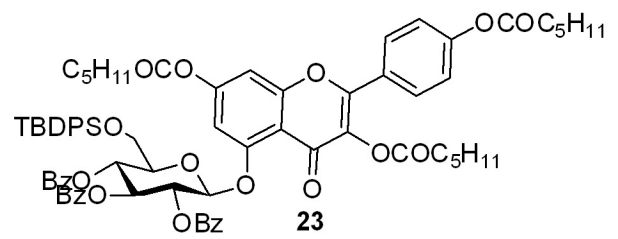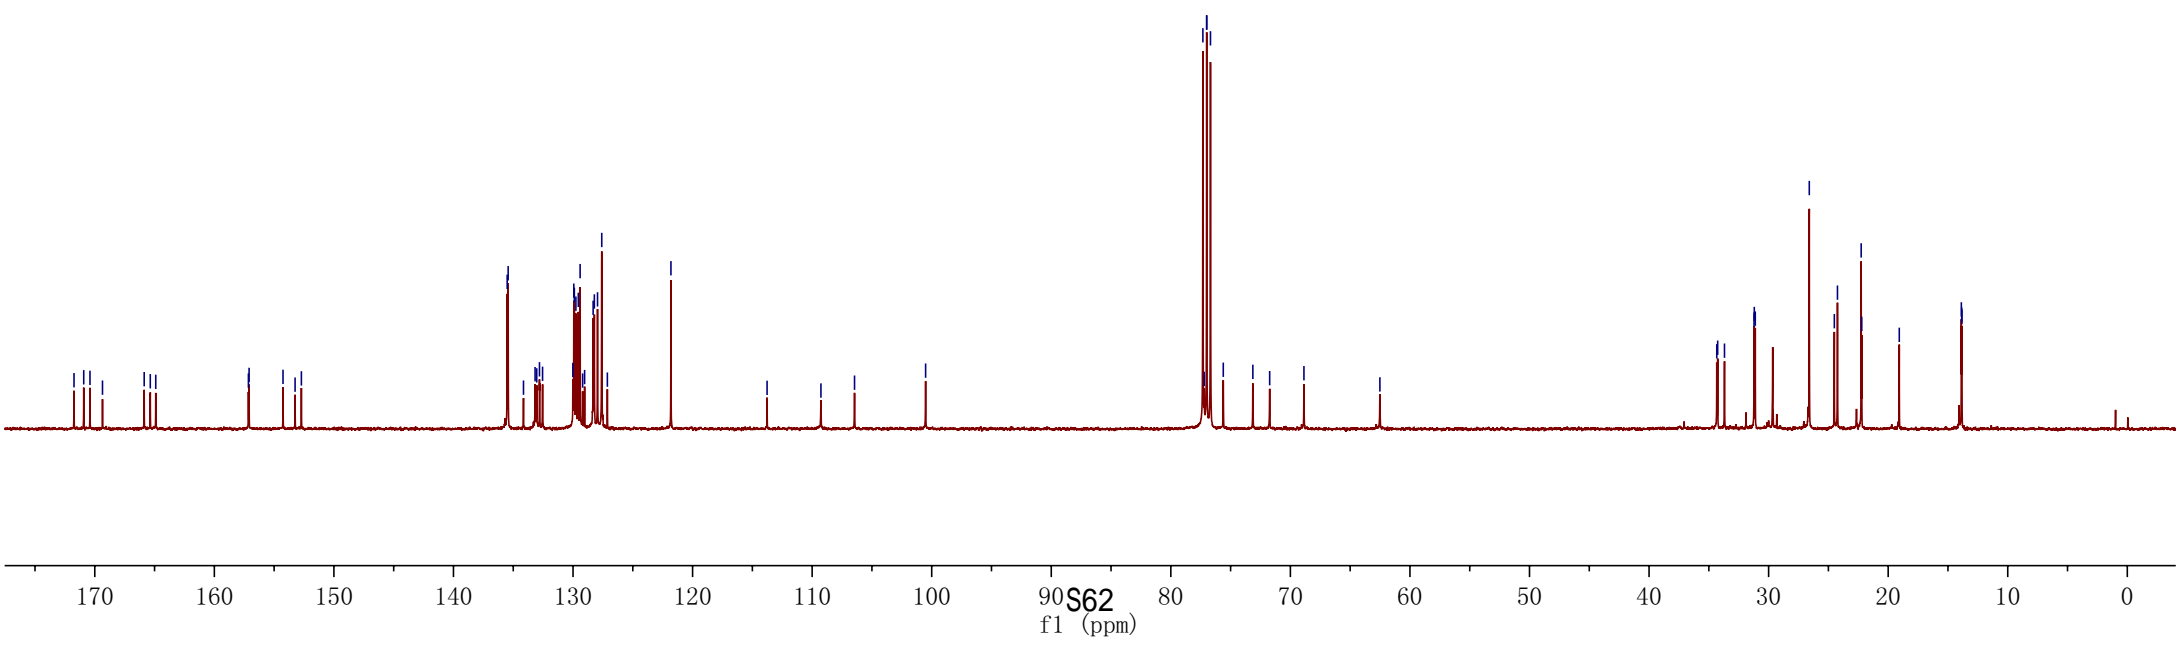

8.1279  
8.1096  
8.0115  
7.9930  
7.9893  
7.9676  
7.8480  
7.8298  
7.7894  
7.7675  
7.6431  
7.6244  
7.6058  
7.2685  
7.2600  
7.2595  
7.2497  
7.2034  
7.1815  
7.1170  
7.1118  
7.0329  
7.0278  
6.2743  
6.2545  
6.2486  
6.2288  
6.0780  
6.0703  
5.7072  
5.6988  
5.6812  
5.6728  
5.5600  
5.5403  
4.6805  
4.6635  
4.6527  
4.6359  
4.5545  
4.5395  
4.5266  
4.5117  
4.4987  
4.4824  
4.4670

2.5943  
2.5757  
2.5569  
2.4392  
2.3691  
1.7848  
1.5705  
1.3977  
1.2808  
1.2554  
0.9524  
0.8841

Parameter Value  
Solvent CDCl<sub>3</sub>  
Experiment 1D  
Spectrometer Frequency 400.13  
Nucleus <sup>1</sup>H

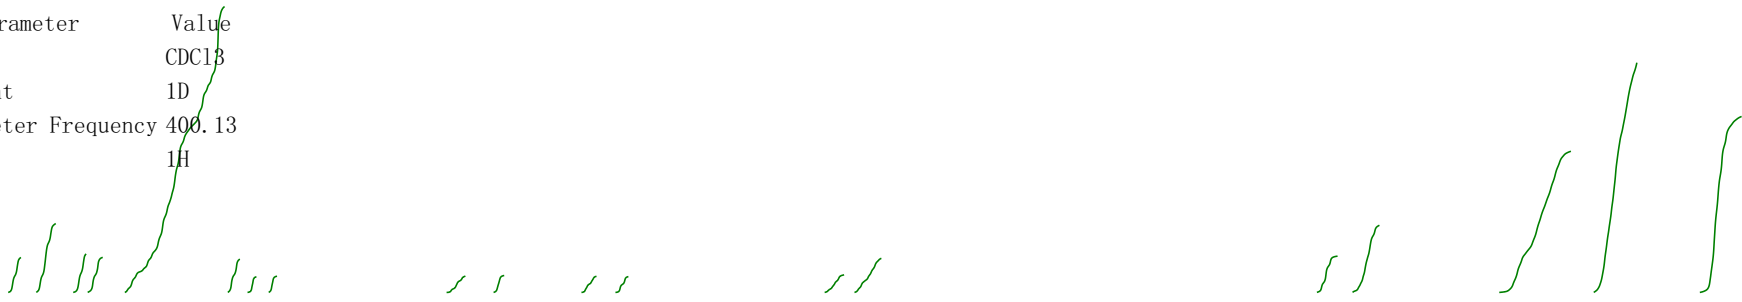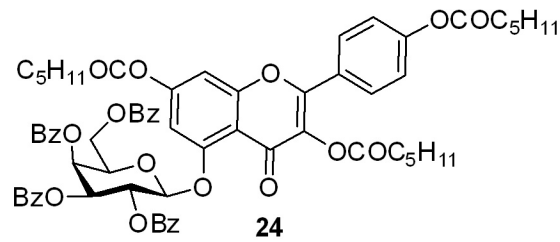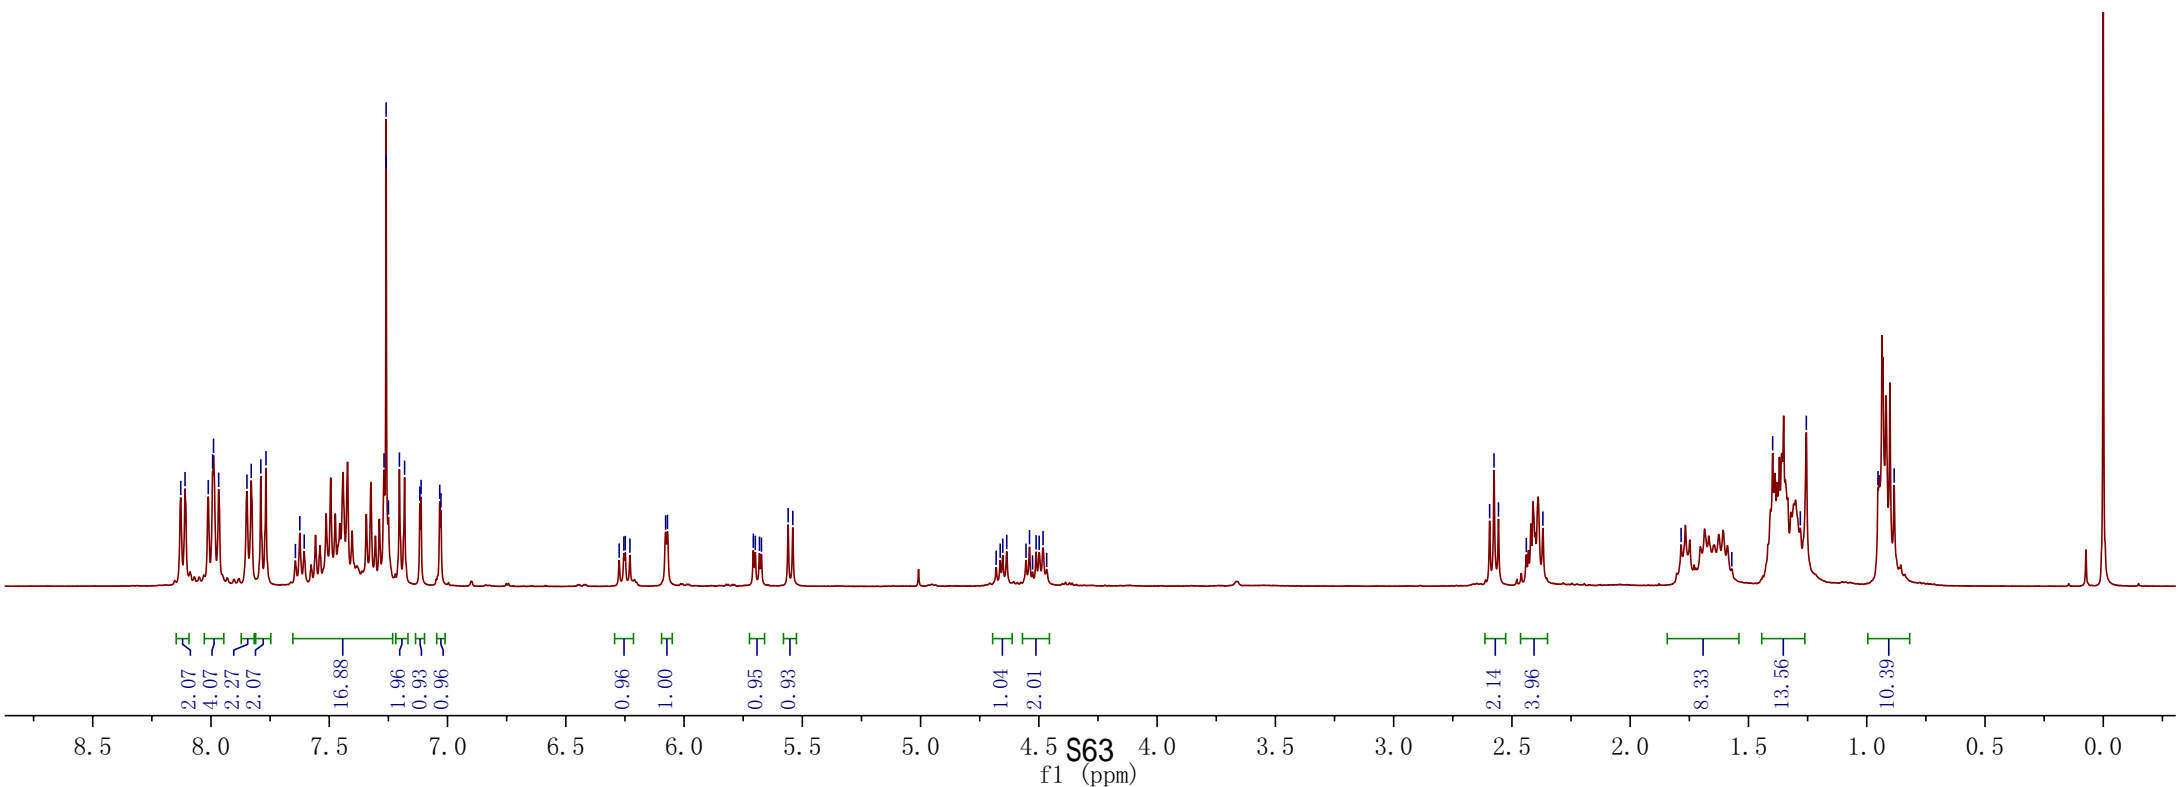

S63  
f1 (ppm)

171.7440  
171.0371  
170.3510  
169.3035  
165.9904  
165.5689  
165.4651  
157.1448  
157.0629  
154.2329  
153.2644  
152.7121  
133.5904  
133.2336  
133.1895  
132.5840  
130.0674  
129.9833  
129.8461  
129.7544  
129.3912  
128.8999  
128.6177  
128.4222  
128.2726  
127.8683  
127.8683

113.6822  
109.0947  
106.5840  
100.9971

77.3176  
77.2030  
77.0000  
77.0000  
76.6819  
71.9114  
71.6283  
69.0899  
67.9682  
62.1968

34.3212  
34.1694  
33.6545  
31.2037  
31.1901  
31.1180  
24.4934  
24.2587  
24.2252  
22.2446

13.8646

-0.0460

Parameter Value  
Solvent CDC13  
Experiment 1D  
Spectrometer Frequency 100.61  
Nucleus 13C

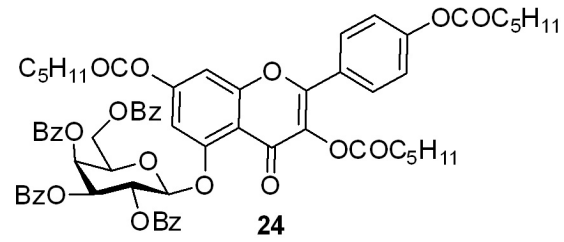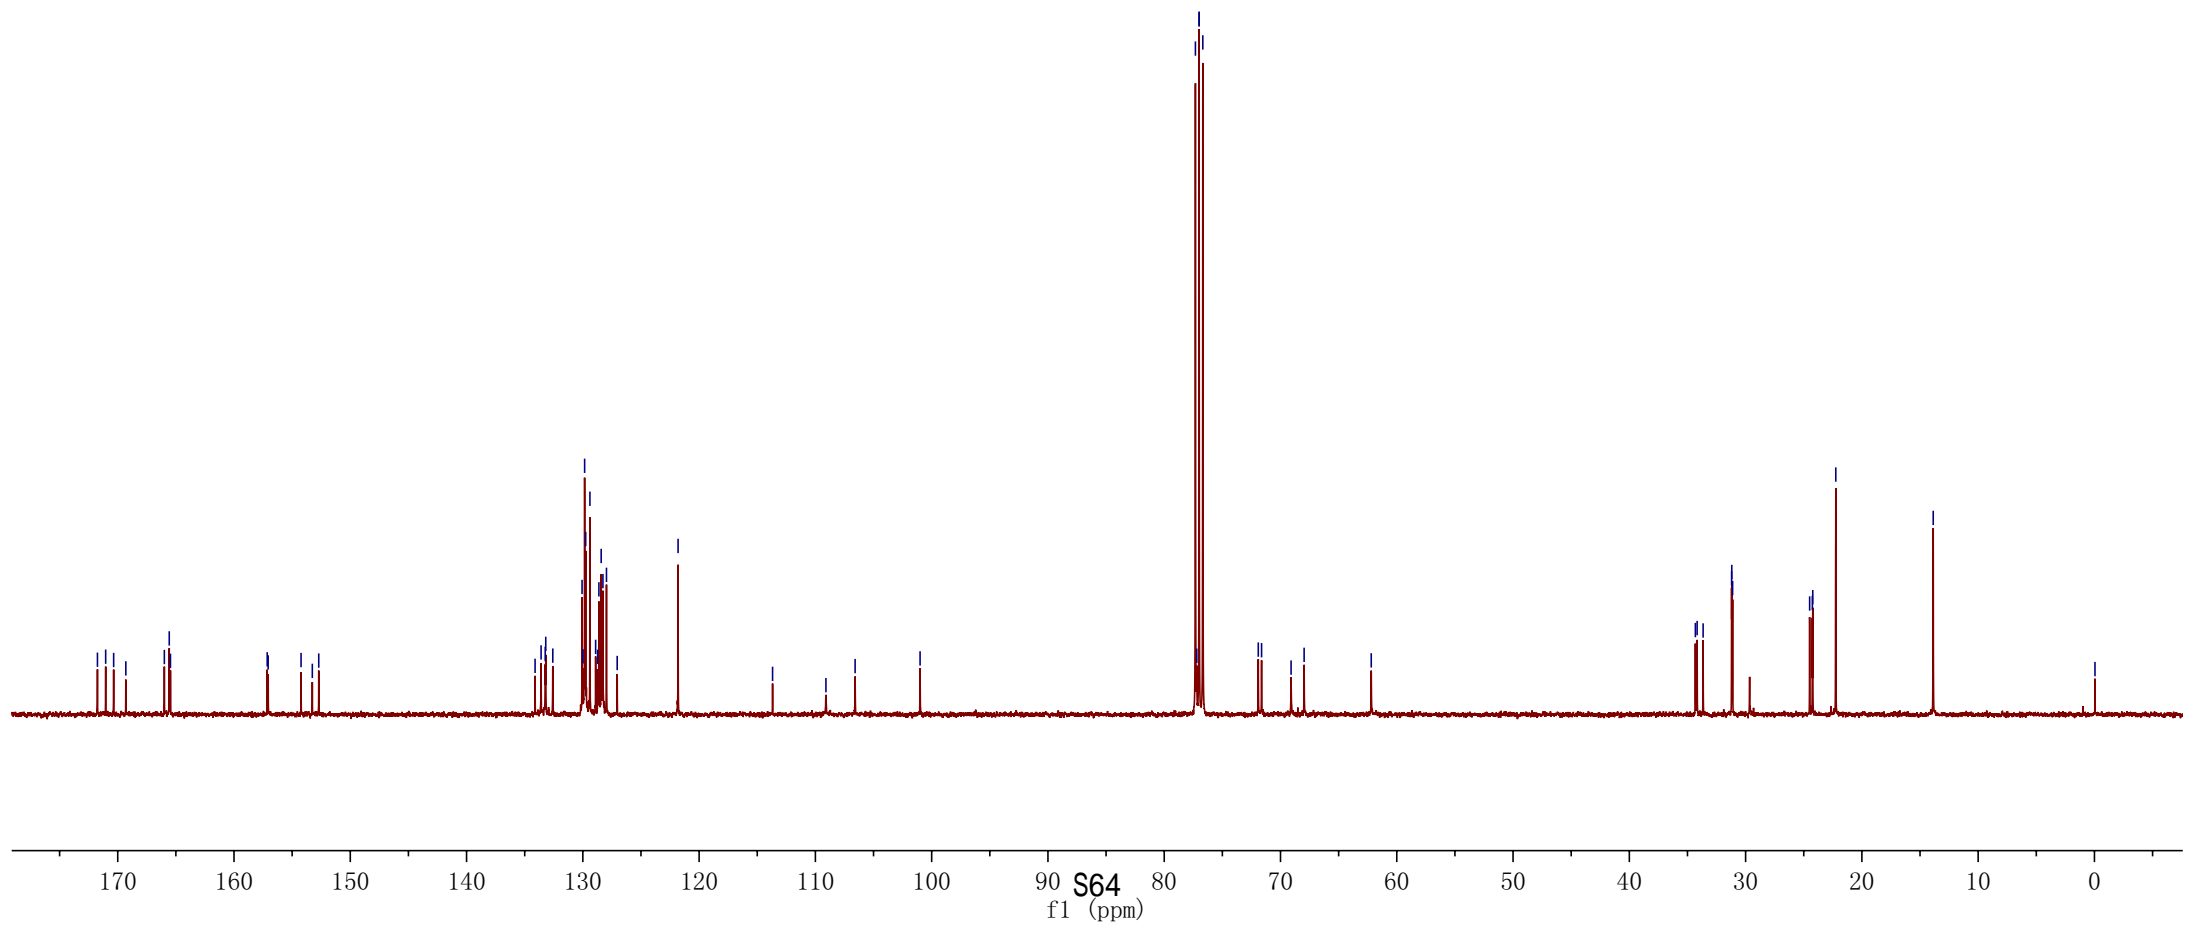



8.1521  
8.1337  
8.0459  
8.0272  
7.8963  
7.8751  
7.8607  
7.6244  
7.6059  
7.5359  
7.4879  
7.4405  
7.3749  
7.2863  
7.2600  
7.2597  
7.2379  
7.1025  
7.0980  
6.9414  
6.9370  
6.3614  
6.3361  
6.3278  
6.0470  
5.8954  
5.8130  
5.7881  
5.7631

4.4454  
4.4304  
4.4148  
4.4060  
4.3904  
4.3750

2.6834  
2.6654  
2.6494  
2.6151  
2.6069  
2.5964  
2.5884  
2.5778  
2.5696

1.8034  
1.7852  
1.7673  
1.7505  
1.4120  
1.3882  
1.3477  
1.3321  
1.2587  
0.9638  
0.9469  
0.9313  
0.9140  
0.8641  
0.8468  
0.8297

Parameter Value  
Solvent CDC13  
Experiment 1D  
Spectrometer Frequency 400.13  
Nucleus 1H

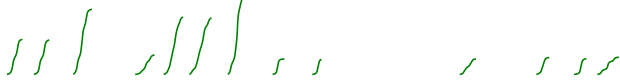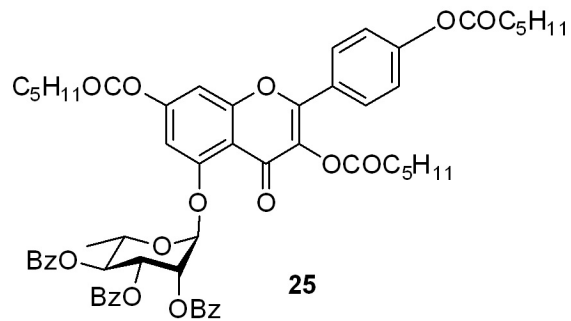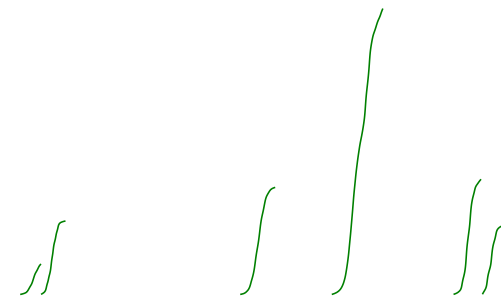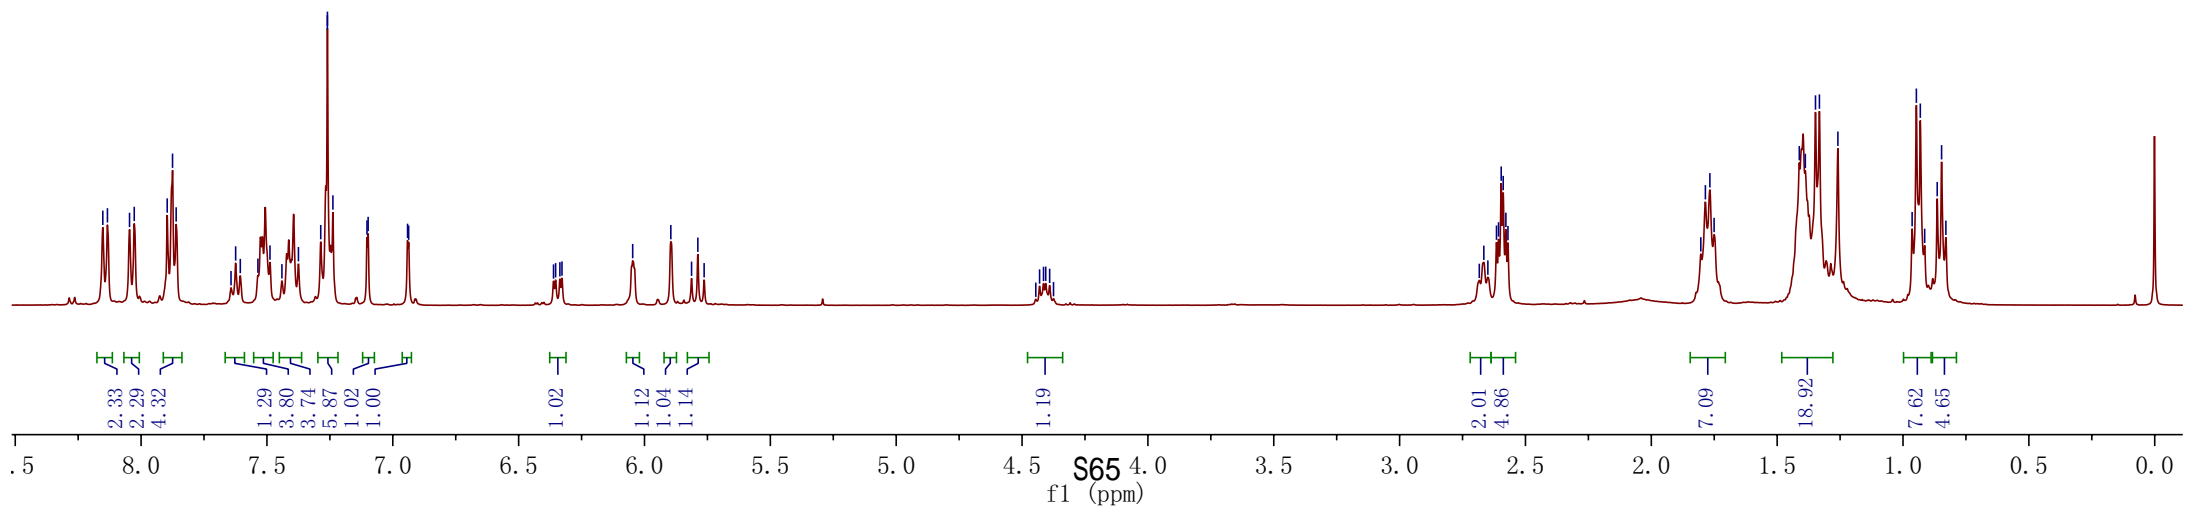

171.7405  
171.0458  
170.9825  
169.9995  
165.9218  
165.4273  
165.0125

157.5725  
156.1173  
154.5703  
153.5722  
152.7870

134.2525  
133.4794  
133.2239  
132.8584  
129.9380  
129.9001  
129.7029  
129.5178  
129.4560  
129.3285  
129.2614  
128.5658  
128.3365  
128.1594  
127.1473  
121.8774

113.1250

105.7013  
105.3991

96.3186

77.3180  
77.2016  
77.0000  
76.9999  
76.6825  
71.6557  
70.5670  
69.7039  
68.2854

34.3325  
33.9498  
31.1964  
31.1511  
31.1380  
24.5036  
24.4071  
24.3672  
22.2635  
22.2301  
17.6190  
13.8569  
13.8334  
13.8065

| Parameter              | Value  |
|------------------------|--------|
| Solvent                | CDC13  |
| Experiment             | 1D     |
| Spectrometer Frequency | 100.61 |
| Nucleus                | 13C    |

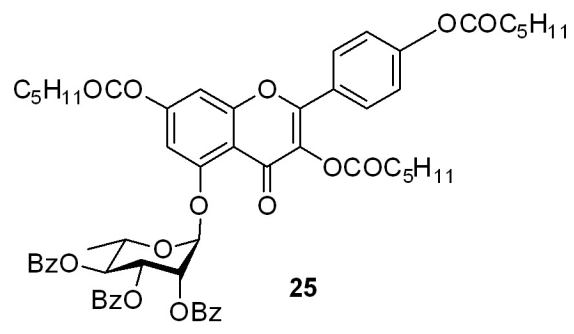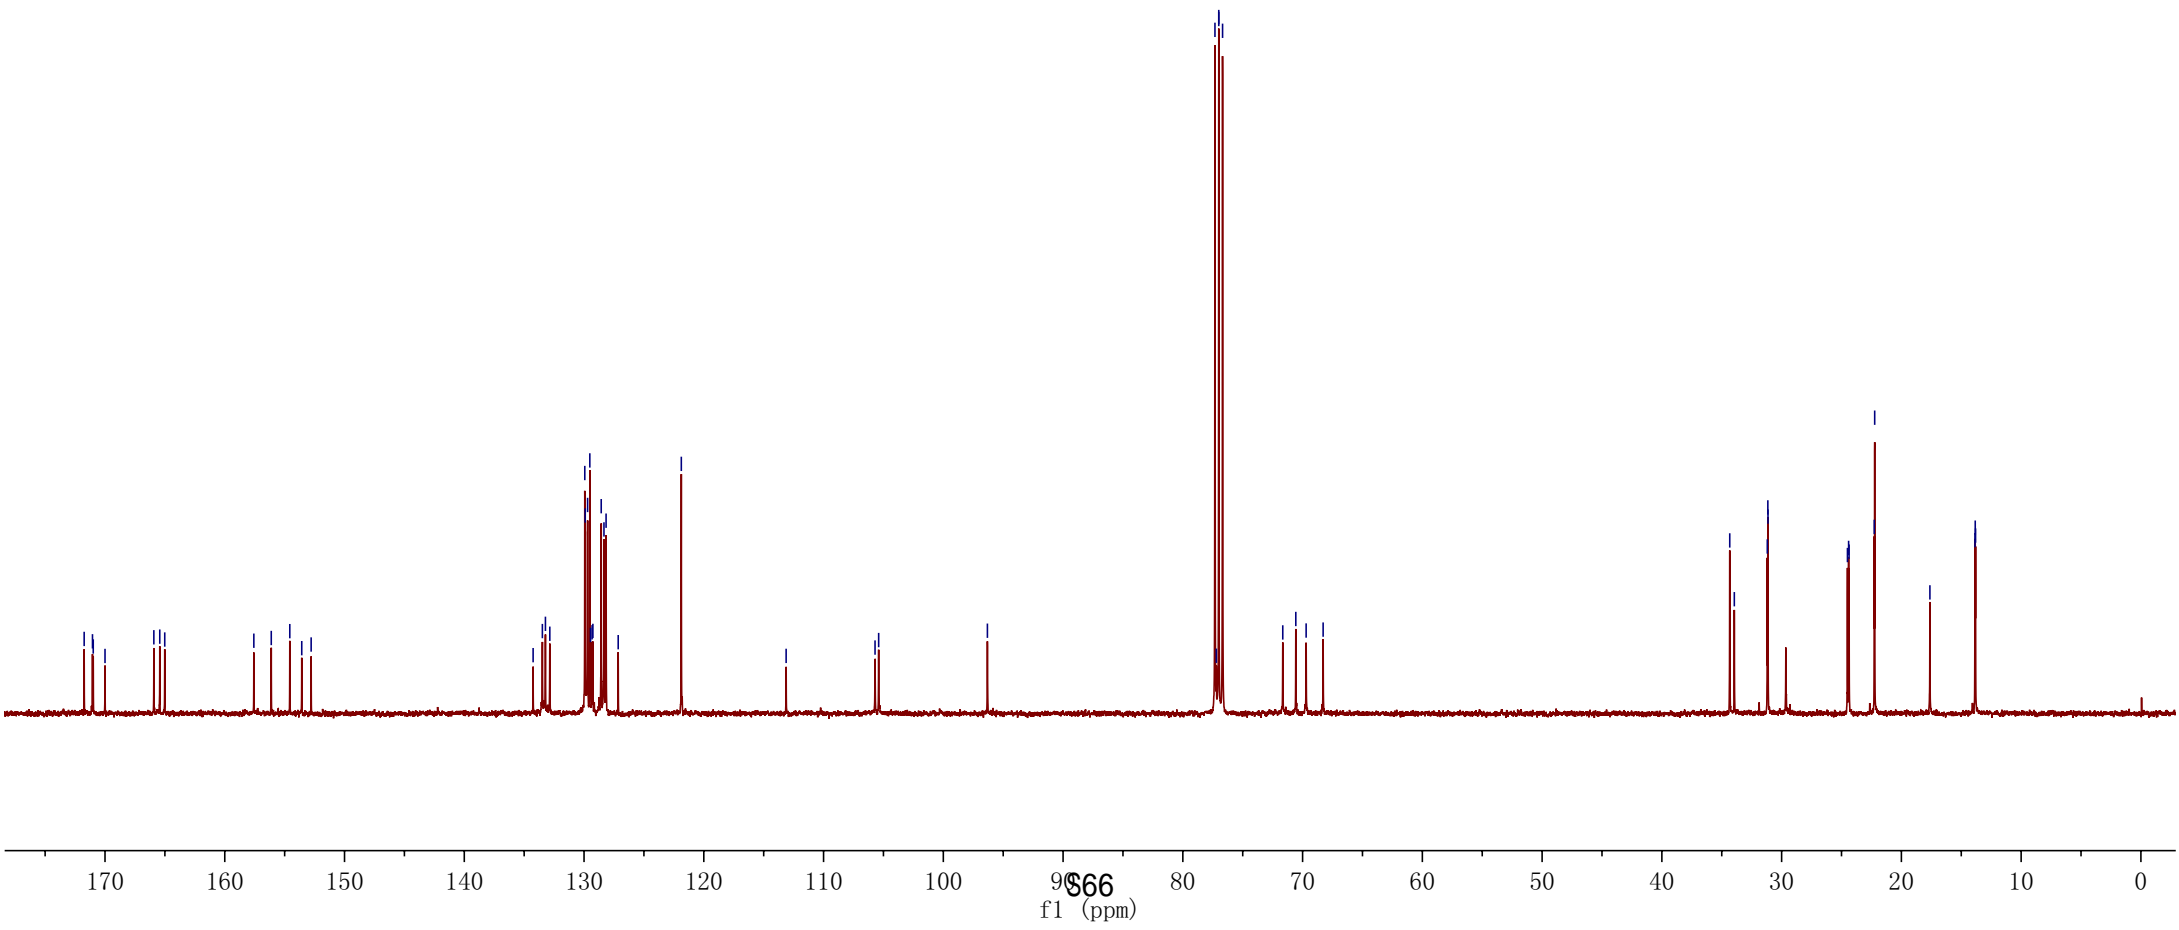

8.0141  
7.9961  
7.9930  
7.9739  
7.9559  
7.9011  
7.8832  
7.8127  
7.7908  
7.5467  
7.5281  
7.5095  
7.3035  
7.2845  
7.2600  
7.2194  
7.1975  
7.0757  
7.0345  
7.0295

6.0544  
6.0309  
6.0076  
5.9497  
5.9316  
5.9259  
5.9076  
5.6236  
5.6043  
5.5805

3.9803  
3.9760  
3.9678  
3.9578  
3.9464  
3.8831  
3.8705  
3.8504  
3.8373  
3.8043

2.5981  
2.5793  
2.5606  
2.4826  
2.4637  
2.4444  
1.7872  
1.7789  
1.7321  
1.7248  
1.6913  
1.6726  
1.6541  
1.6361  
1.6174  
1.3970  
1.3890  
1.2932

0.9545  
0.8895

| Parameter              | Value          |
|------------------------|----------------|
| Solvent                | CDC13          |
| Experiment             | 1D             |
| Spectrometer Frequency | 400.13         |
| Nucleus                | <sup>1</sup> H |

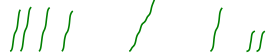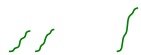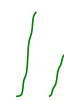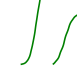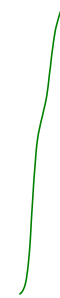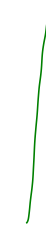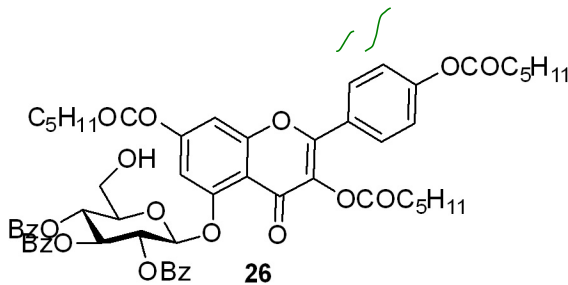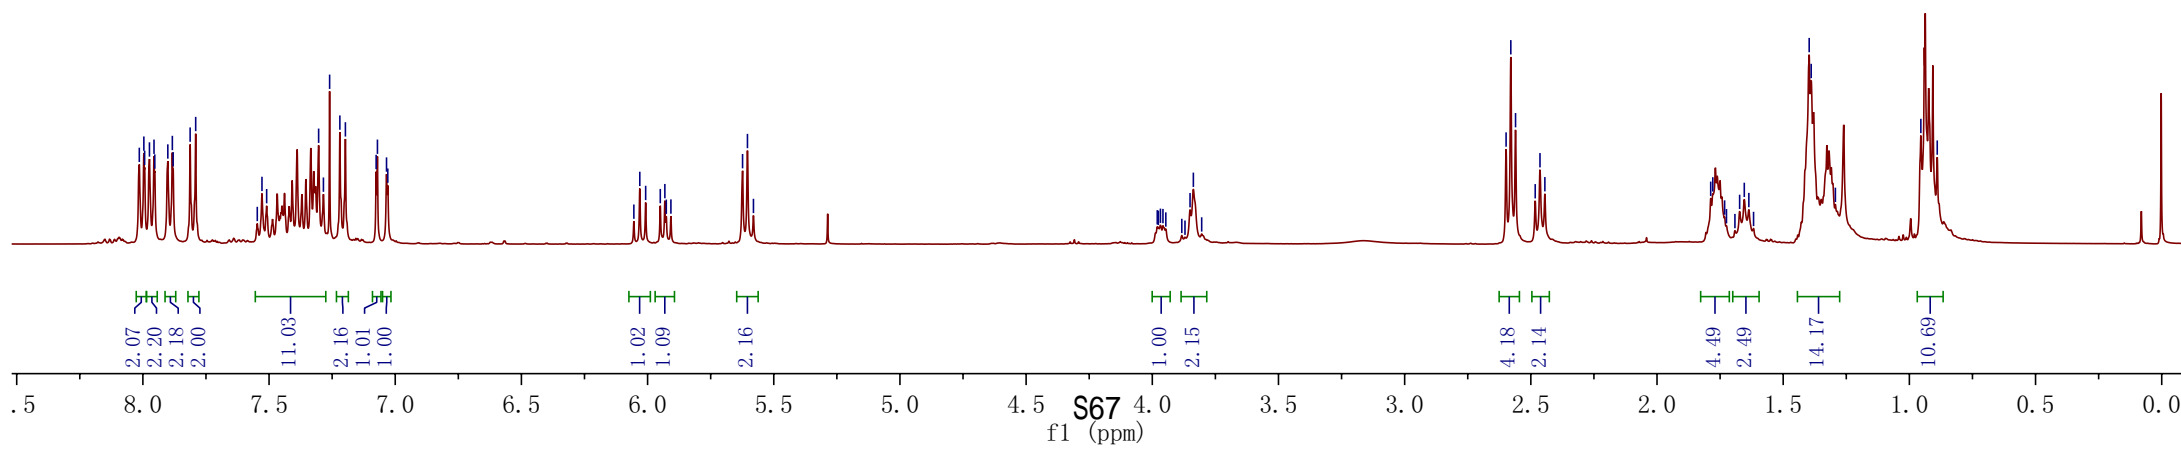

171.7250  
171.2147  
170.5001  
169.6044  
165.7806  
165.7392  
165.2463

157.1954  
156.2732  
154.1433  
153.4089  
152.7605

134.0788  
133.5320  
133.1536  
132.7243  
129.9392  
129.8920  
129.8058  
129.7066  
129.4286  
128.8918  
128.6824  
128.4298  
128.2529  
128.0109  
126.9633  
121.8342

113.9139

110.1672

106.4510

100.3416

77.3173  
77.2017  
77.0000  
76.9995  
76.6819  
75.9864  
72.5169  
71.7237  
69.7545  
61.7404

34.3417  
34.3070  
33.6917  
31.1774  
31.1389  
24.4808  
24.3314  
24.2309  
22.2321

13.8671  
13.8495

-0.0580

| Parameter              | Value           |
|------------------------|-----------------|
| Solvent                | CDC13           |
| Experiment             | 1D              |
| Spectrometer Frequency | 100.61          |
| Nucleus                | <sup>13</sup> C |

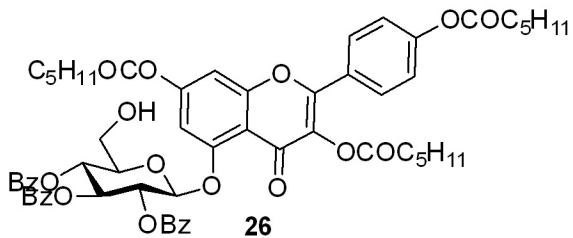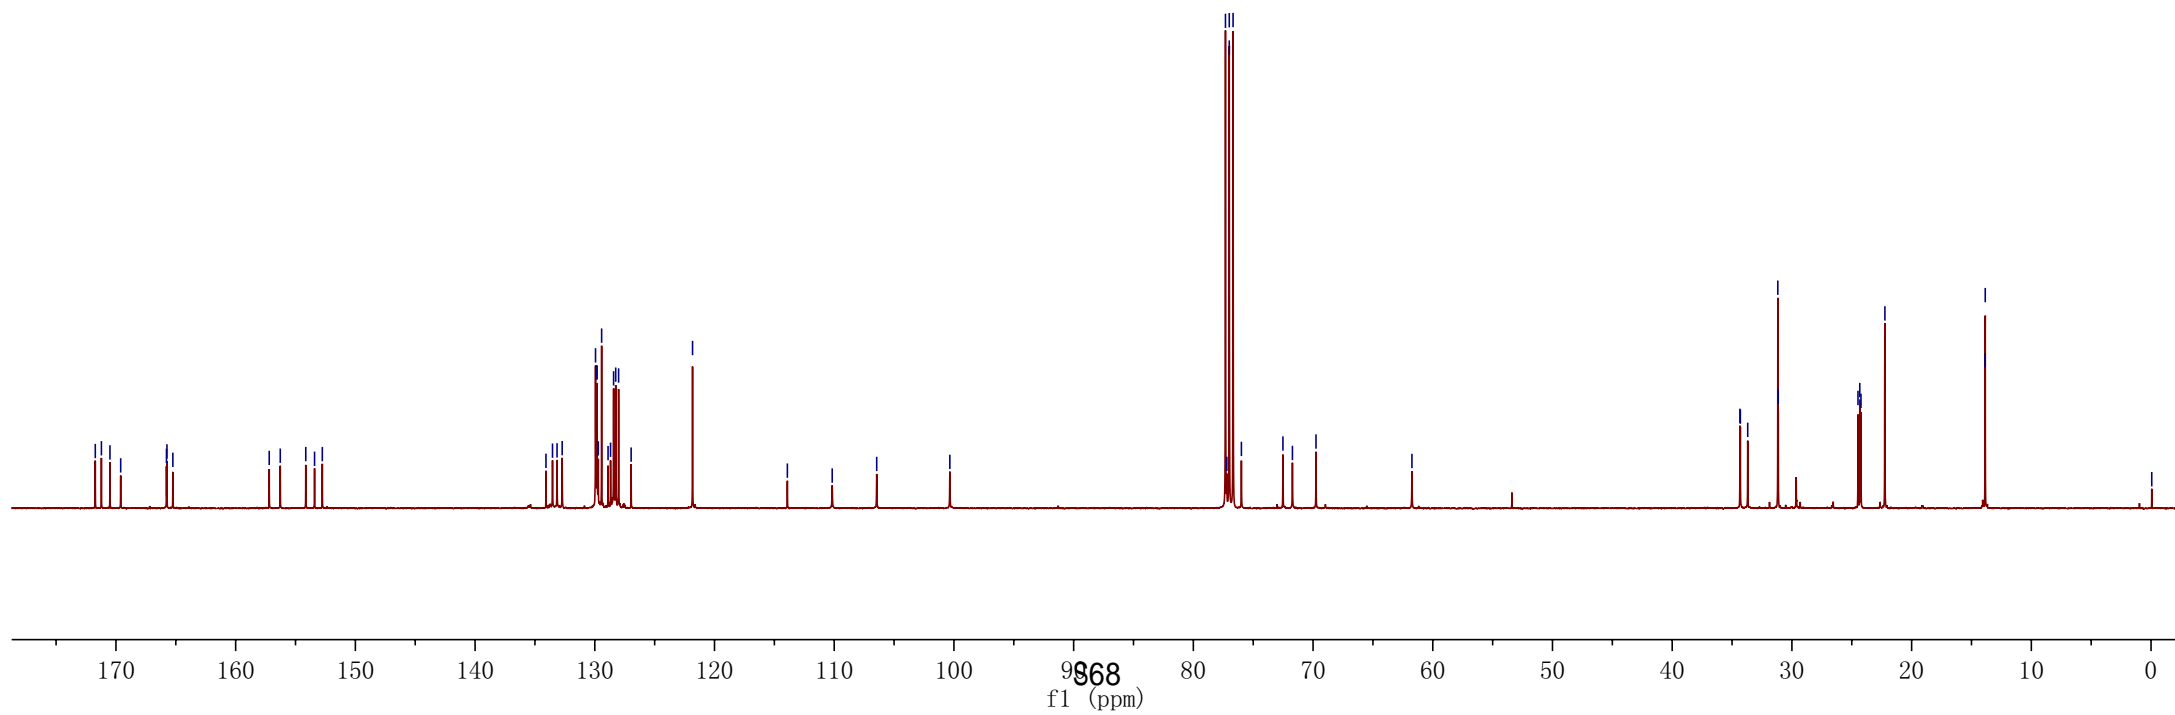

8.0348  
8.0156  
7.9981  
7.9517  
7.9319  
7.9124  
7.7798  
7.7754  
7.7577  
7.5945  
7.5761  
7.5574  
7.3218  
7.3020  
7.2600  
7.2598  
7.2342  
7.1945  
7.1727  
7.0757  
7.0713  
7.0545

6.0522  
6.0295  
6.0068  
5.9405  
5.9226  
5.8997  
5.7069  
5.6896  
5.6817  
5.6718  
5.6537  
5.6307  
5.5897  
5.5657

4.2999  
4.2823  
4.2654  
4.0961  
4.0802  
4.0646  
4.0561  
4.0405  
4.0094  
3.9853  
3.9432  
3.9264  
3.9143  
3.8975

2.5978  
2.5792  
2.5603  
2.4558  
2.4366  
2.4288  
2.4171  
2.4098  
2.3907

1.8079  
1.7893

1.2159  
1.2004  
1.1768  
0.9556  
0.9382  
0.8197  
0.8021

| Parameter              | Value  |
|------------------------|--------|
| Solvent                | CDC13  |
| Experiment             | 1D     |
| Spectrometer Frequency | 400.13 |
| Nucleus                | 1H     |

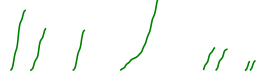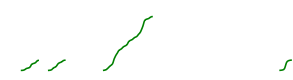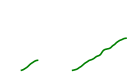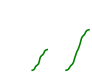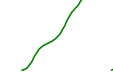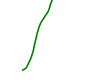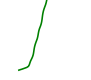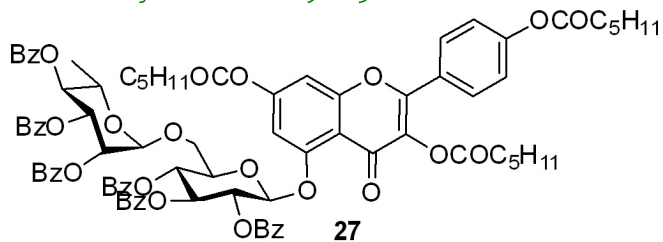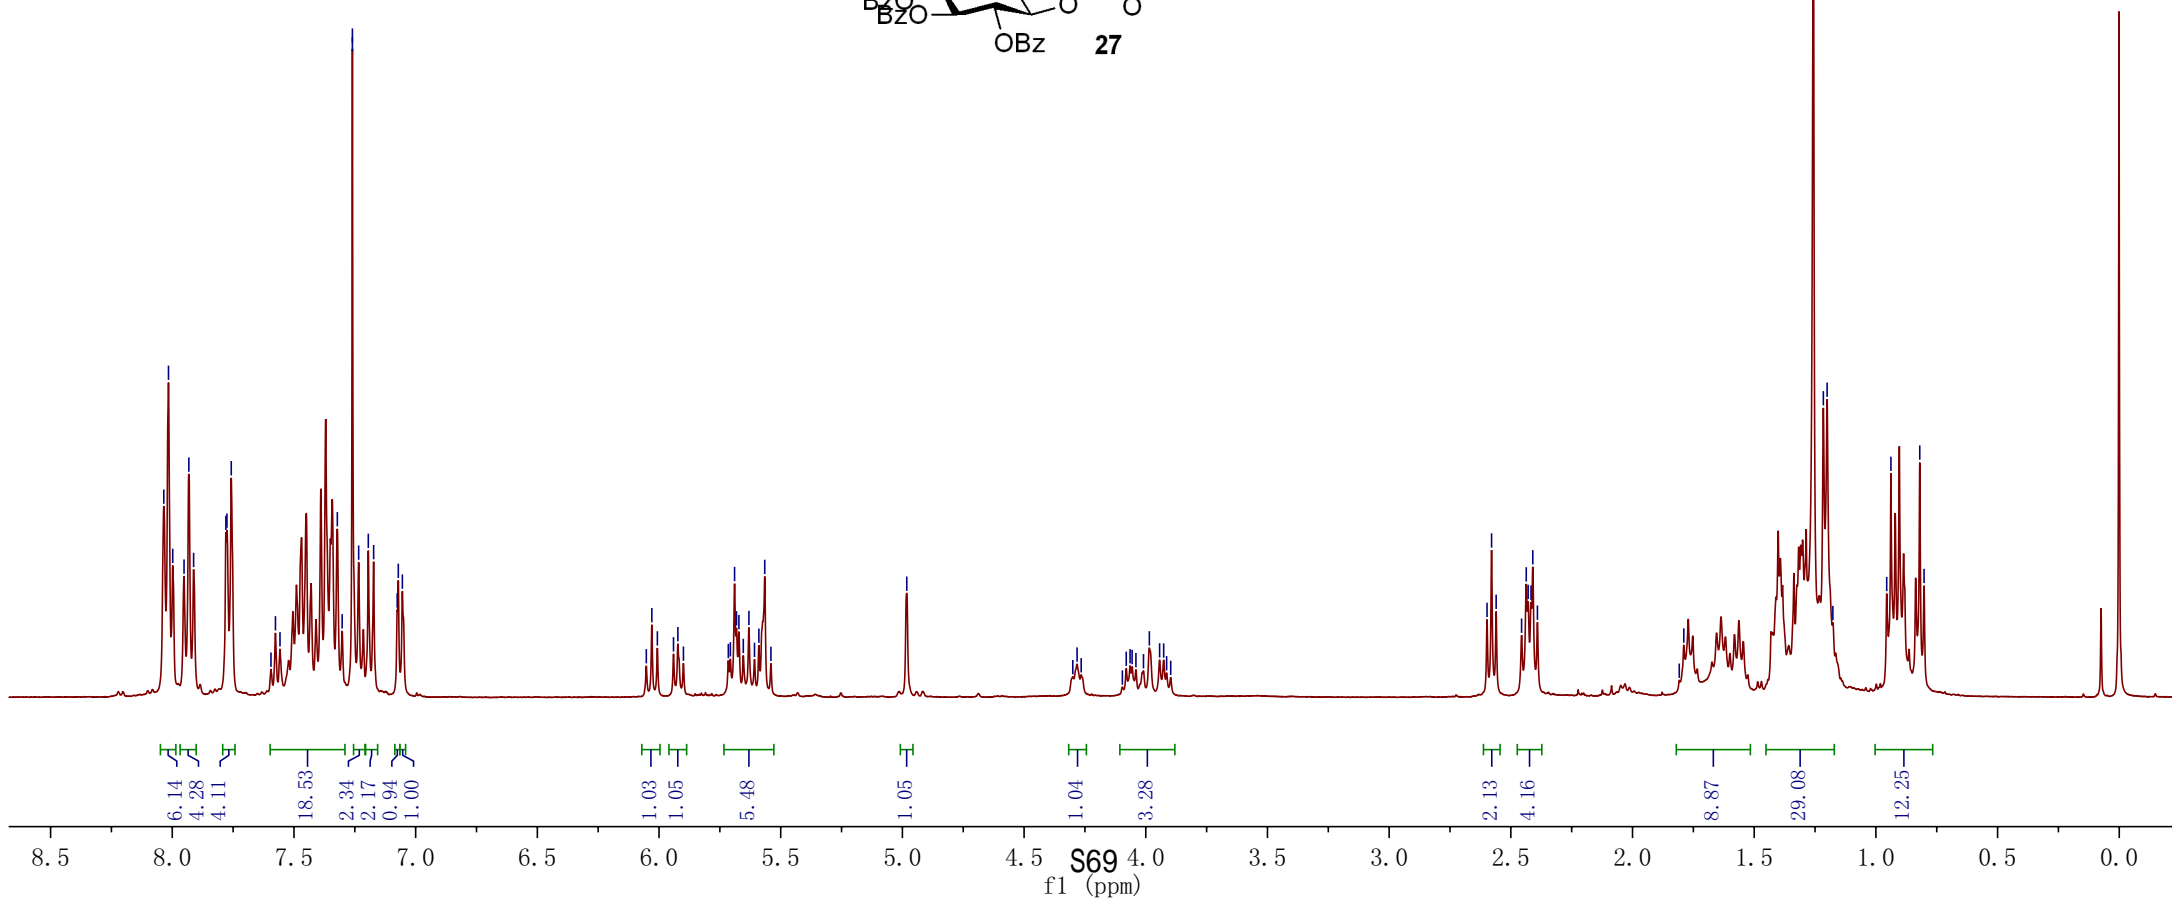

6.14  
4.28  
4.11  
18.53  
2.34  
2.17  
0.94  
1.00

1.03  
1.05  
5.48  
1.05

1.04  
3.28

2.13  
4.16

8.87  
29.08

12.25

171.7526  
171.0713  
170.3930  
169.4976  
165.7403  
165.2869  
165.1303  
165.0734  
156.4302  
154.3023  
153.3050  
152.6766

133.2364  
130.0320  
129.9341  
129.8512  
129.7403  
129.6292  
129.4610  
129.2814  
128.4811  
128.4641  
128.3606  
128.2794  
128.1760  
128.0163  
127.9697

113.7832  
109.8452  
106.7533

100.1736  
98.1445

77.3176  
77.2032  
77.0002  
77.0000  
76.6823  
74.4037  
72.4989  
71.7486  
71.6712  
70.8526  
69.8794  
69.7328  
67.1914  
66.8876

34.3541  
34.1223  
33.7106  
31.2220  
31.0445  
29.6731  
24.5238  
24.2634  
22.2791  
22.2145  
17.9044  
13.8805  
13.8290

-0.0310

Parameter Value  
Solvent CDC13  
Experiment 1D  
Spectrometer Frequency 100.61  
Nucleus 13C

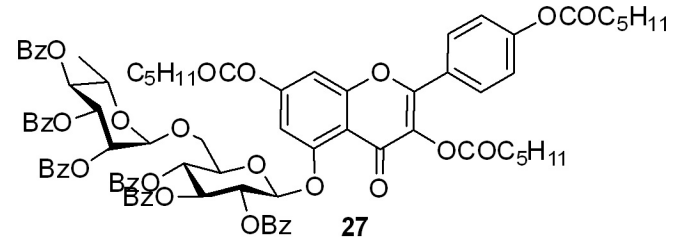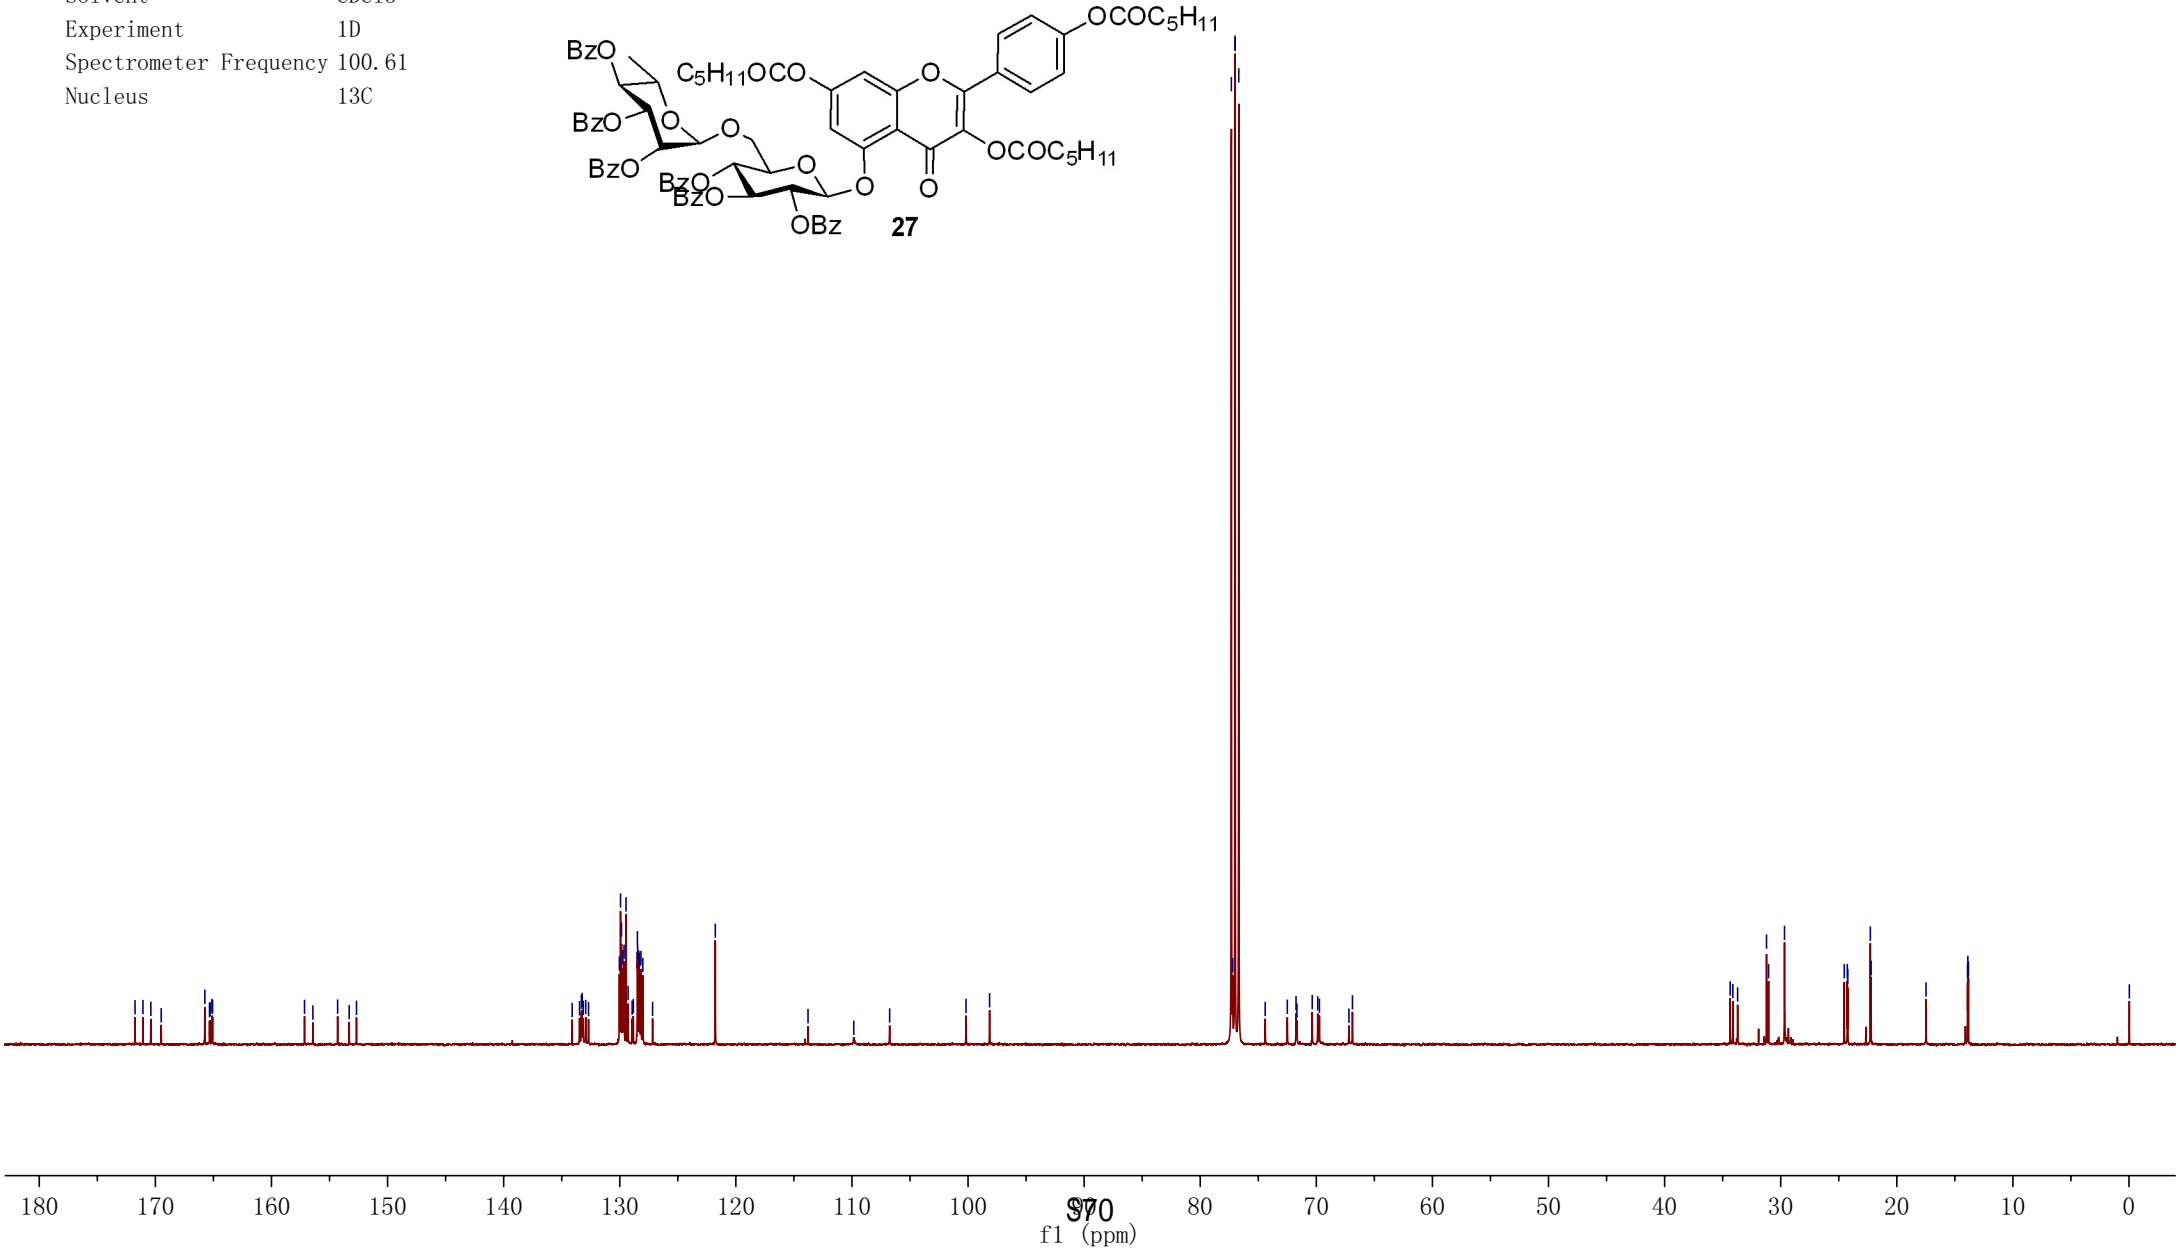

8.0618  
8.0427  
8.0240  
7.9605  
7.9447  
7.9243

7.4638  
7.4449  
7.4259  
7.2984  
7.2600  
7.2595  
7.0079  
7.0059  
6.9869  
6.8676  
6.6759  
6.6494

6.0881  
6.0642  
6.0457  
6.0215  
5.7603  
5.7382  
5.7138  
5.6956

5.1344

4.7381  
4.7152

4.0348  
3.9350

| Parameter              | Value  |
|------------------------|--------|
| Solvent                | CDC13  |
| Experiment             | 1D     |
| Spectrometer Frequency | 400.13 |
| Nucleus                | 1H     |

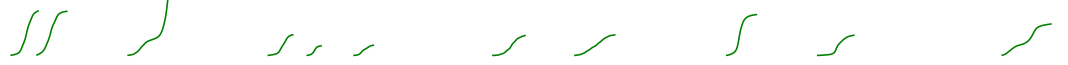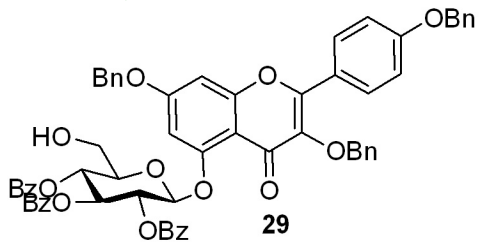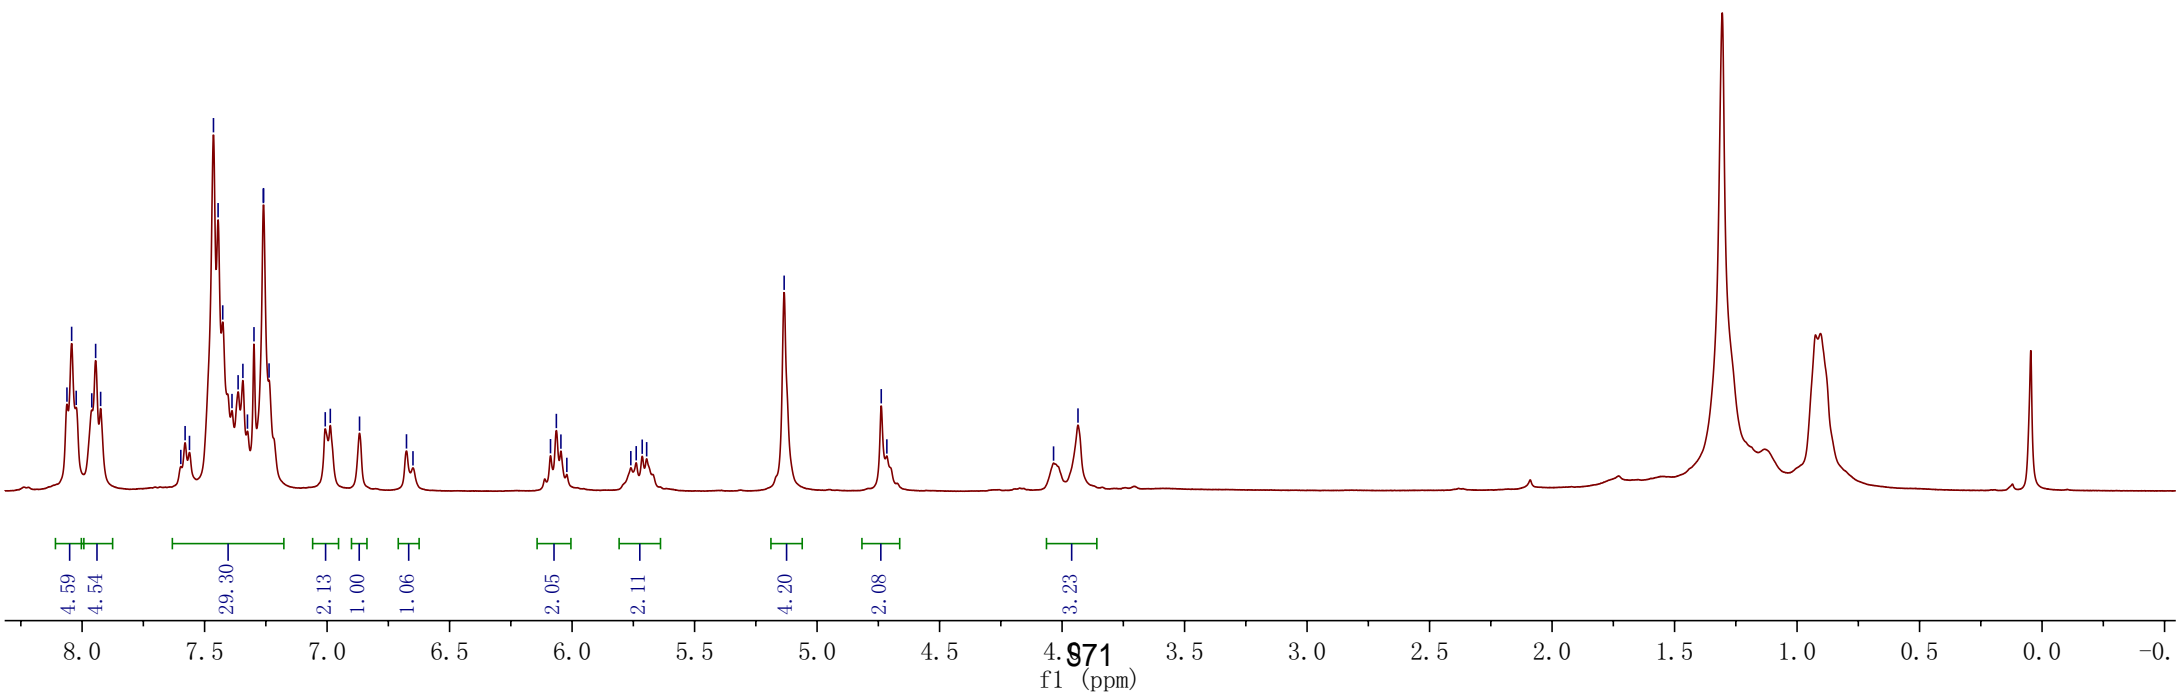

|                        |                 |
|------------------------|-----------------|
| Parameter              | Value           |
| Solvent                | CDC13           |
| Experiment             | 1D              |
| Spectrometer Frequency | 100.61          |
| Nucleus                | <sup>13</sup> C |

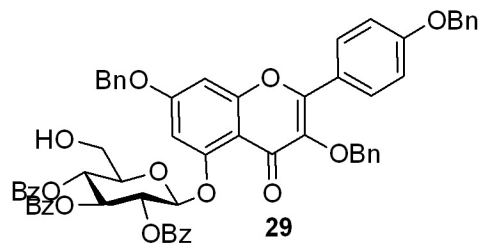

— 172.6957  
 { 165.8647  
 { 165.6030  
 { 165.0464  
 { 162.2862  
 { 160.0508  
 { 157.6589  
 { 157.3715

— 152.8791  
 { 139.1770  
 { 136.8842  
 { 136.3779  
 { 135.8555  
 { 133.3375  
 { 133.0271  
 { 129.9181  
 { 129.8258  
 { 129.7875  
 { 128.9662  
 { 128.8861  
 { 128.7976  
 { 128.5149  
 { 128.3391  
 { 128.1897  
 { 128.1126  
 { 127.9989  
 { 127.9294  
 { 127.7417  
 { 127.6310  
 { 127.3305  
 { 125.2267

— 114.3120  
 — 110.2843

— 102.0678  
 — 100.5206  
 — 97.0460

{ 77.3181  
 { 77.2025  
 { 77.0000  
 { 76.9999  
 { 76.6817  
 { 76.0008  
 { 73.2737  
 { 72.9685  
 { 71.6586  
 { 70.3508  
 { 69.8023  
 { 69.7257

— 61.4706

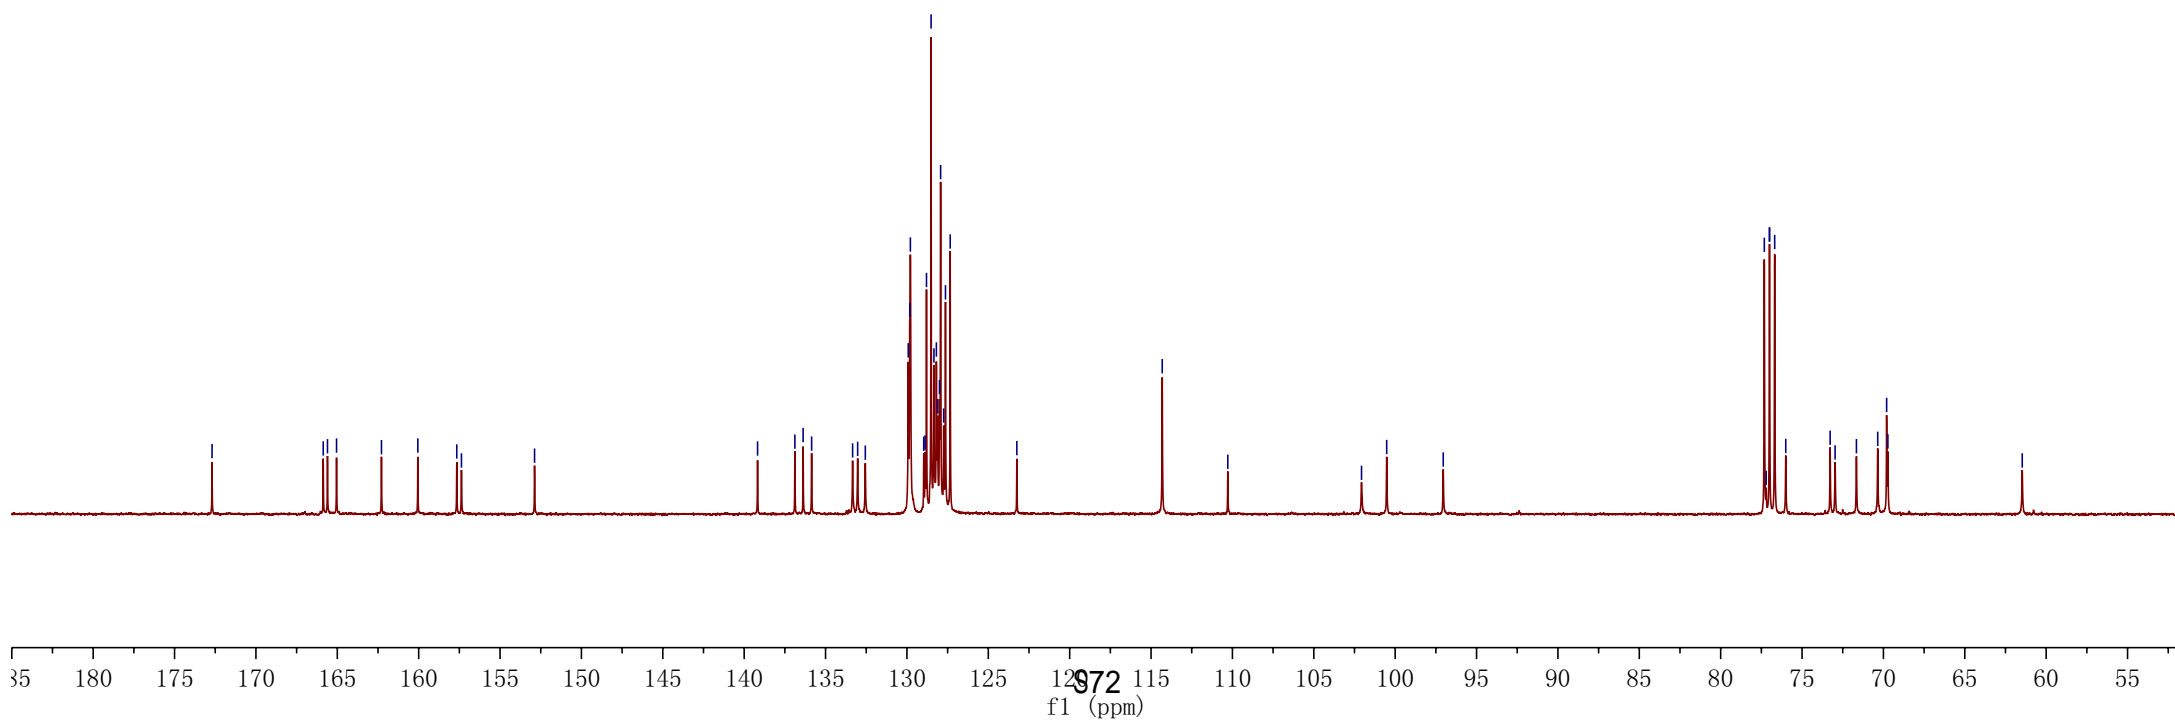



| Parameter              | Value  |
|------------------------|--------|
| Solvent                | CDCl3  |
| Experiment             | 1D     |
| Spectrometer Frequency | 400.13 |
| Nucleus                | 1H     |

8.1110  
8.0926  
8.0265  
8.0051  
7.9863  
7.9417  
7.9229  
7.8709  
7.8486  
7.7223  
7.7042  
7.5725  
7.2600  
7.1770  
6.9685  
6.9462  
6.9070  
6.9020  
6.4909  
6.4860  
6.0908  
6.0677  
6.0448  
5.9953  
5.9774  
5.9541  
5.7313  
5.6666  
5.6002  
5.5650  
5.1149  
5.0697  
5.0486  
4.9809  
4.9609  
4.7695  
4.6762  
4.6493  
4.3105  
4.2929  
4.2846  
4.2680  
4.2514  
4.1155  
4.1001  
4.0917  
4.0761  
4.0194  
3.9957  
3.9694  
3.9534  
3.9403  
3.9243  
3.9166

1.2174  
1.2018

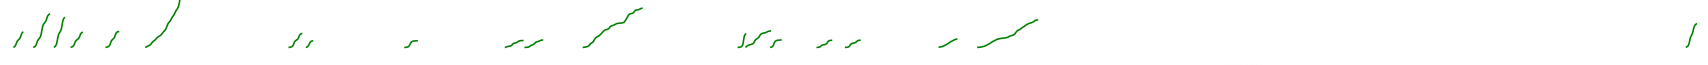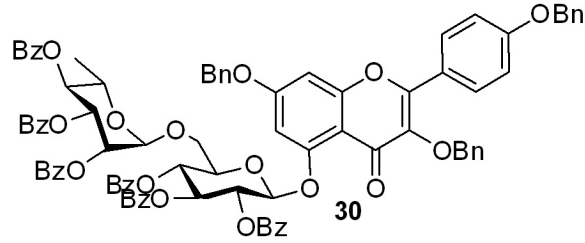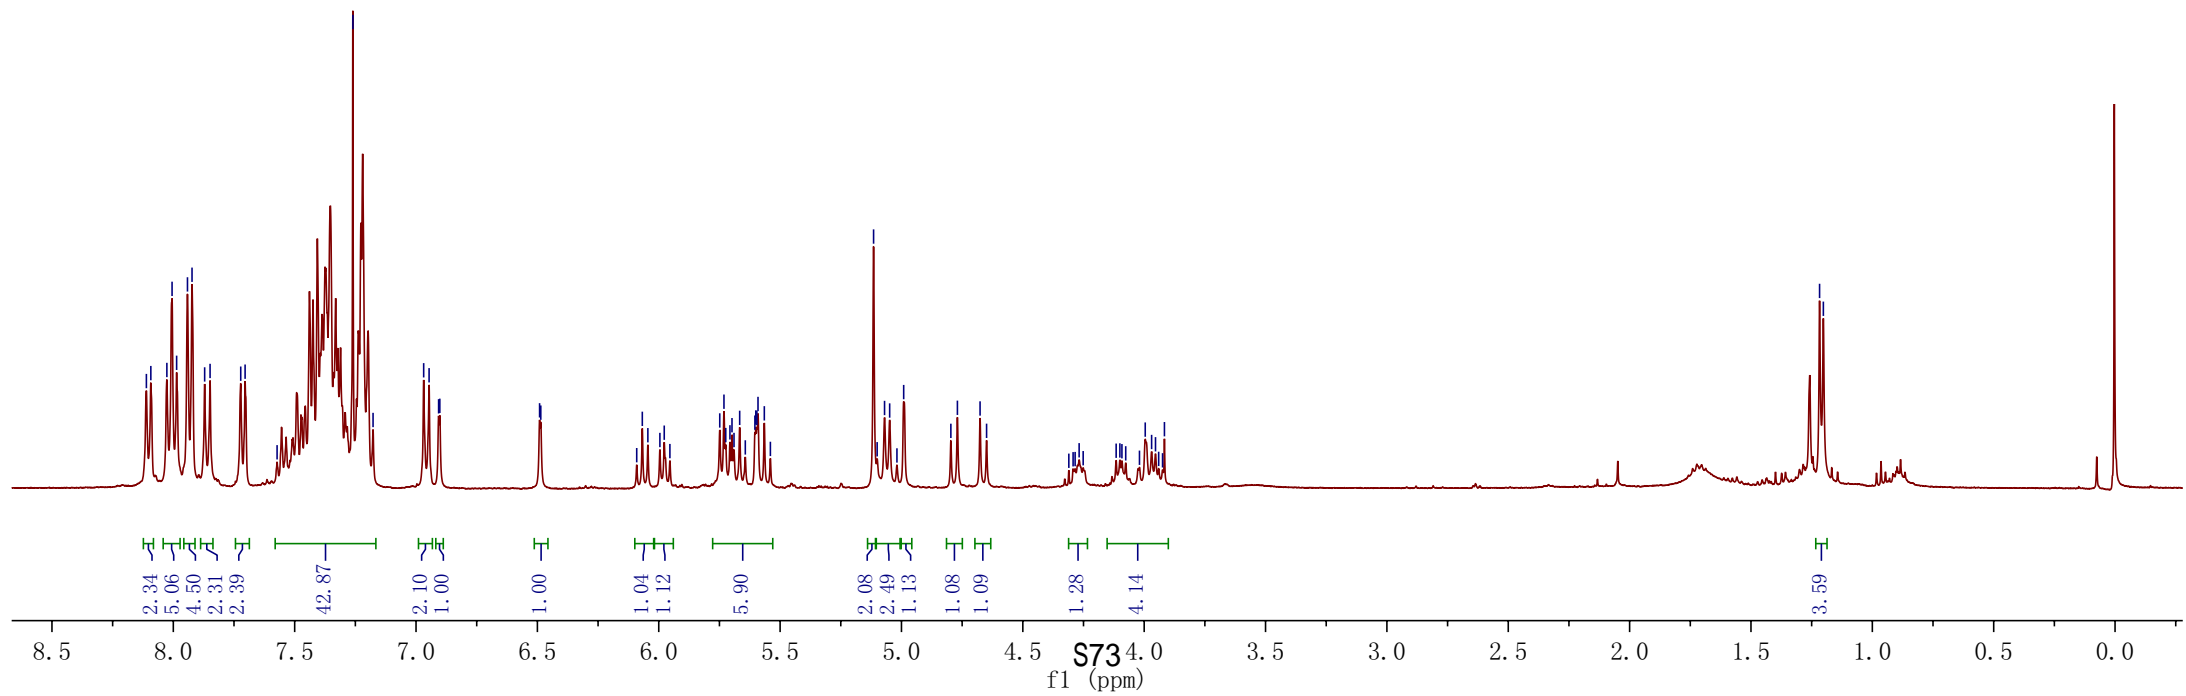

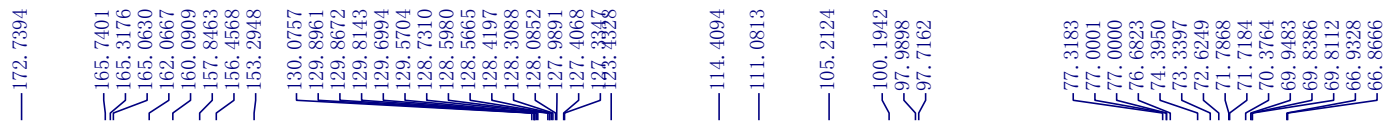

Parameter Value  
 Solvent CDC13  
 Experiment 1D  
 Spectrometer Frequency 100.61  
 Nucleus 13C

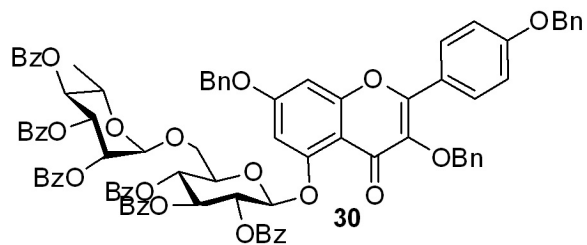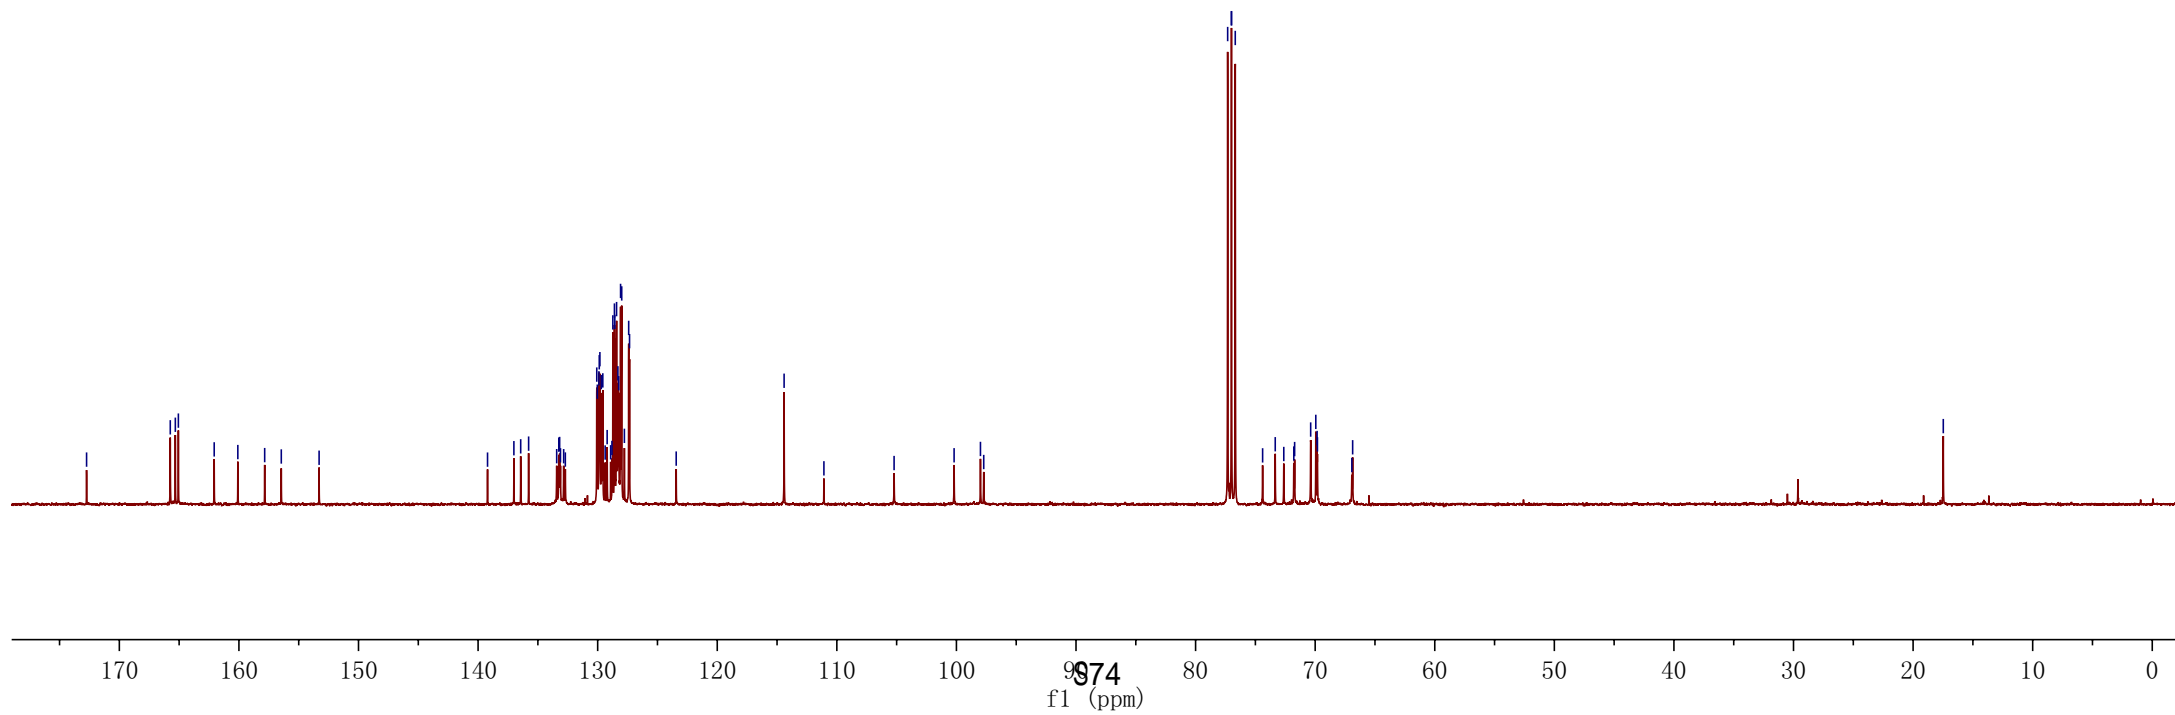

7.8595  
7.8376  
7.2600  
7.2595  
7.2484  
7.2265  
7.1468  
7.1419  
6.9171  
6.9123

5.4301  
5.4106  
5.4065  
5.3872  
5.3233  
5.3001  
5.2957  
5.2768  
5.2367  
5.2178  
5.2091  
5.1529  
5.1336  
5.1281  
5.1041  
5.0806  
5.0595  
5.0349  
5.0104  
4.7385

3.9273  
3.9085  
3.8945  
3.8517  
3.8364  
3.8274  
3.8118  
3.7970  
3.7685  
3.7066  
3.6915  
3.6775  
3.6627

2.3412  
2.3358  
2.3143  
2.0957  
2.0736  
2.0588  
2.0497  
2.0455  
1.9661

1.1902  
1.1746

| Parameter              | Value          |
|------------------------|----------------|
| Solvent                | CDC13          |
| Experiment             | 1D             |
| Spectrometer Frequency | 400.13         |
| Nucleus                | <sup>1</sup> H |

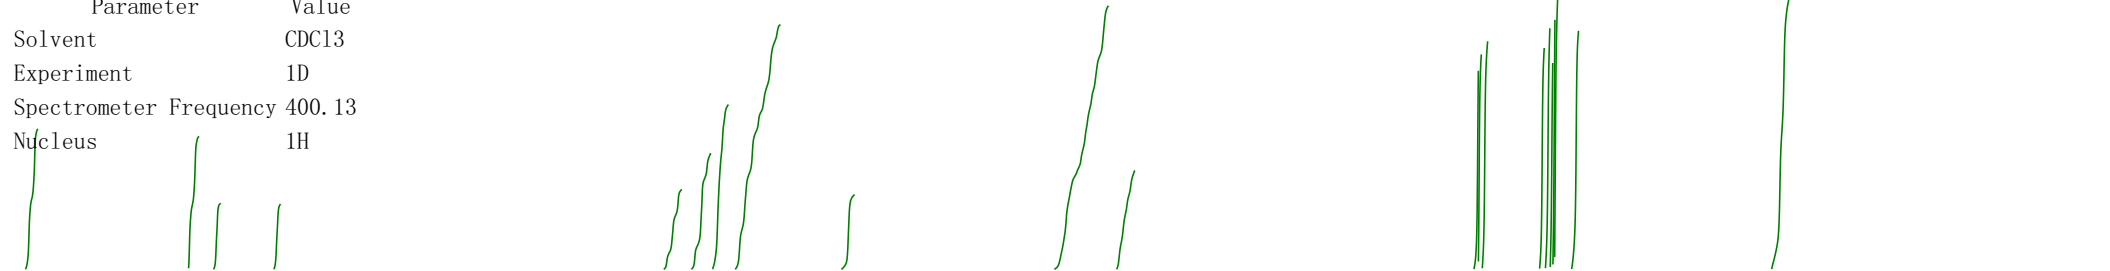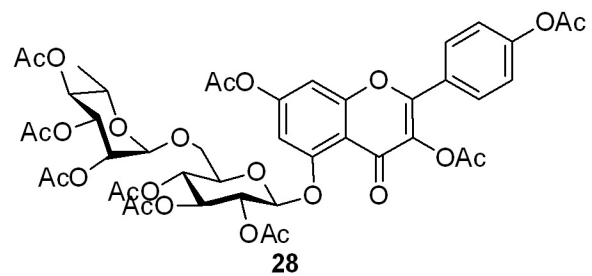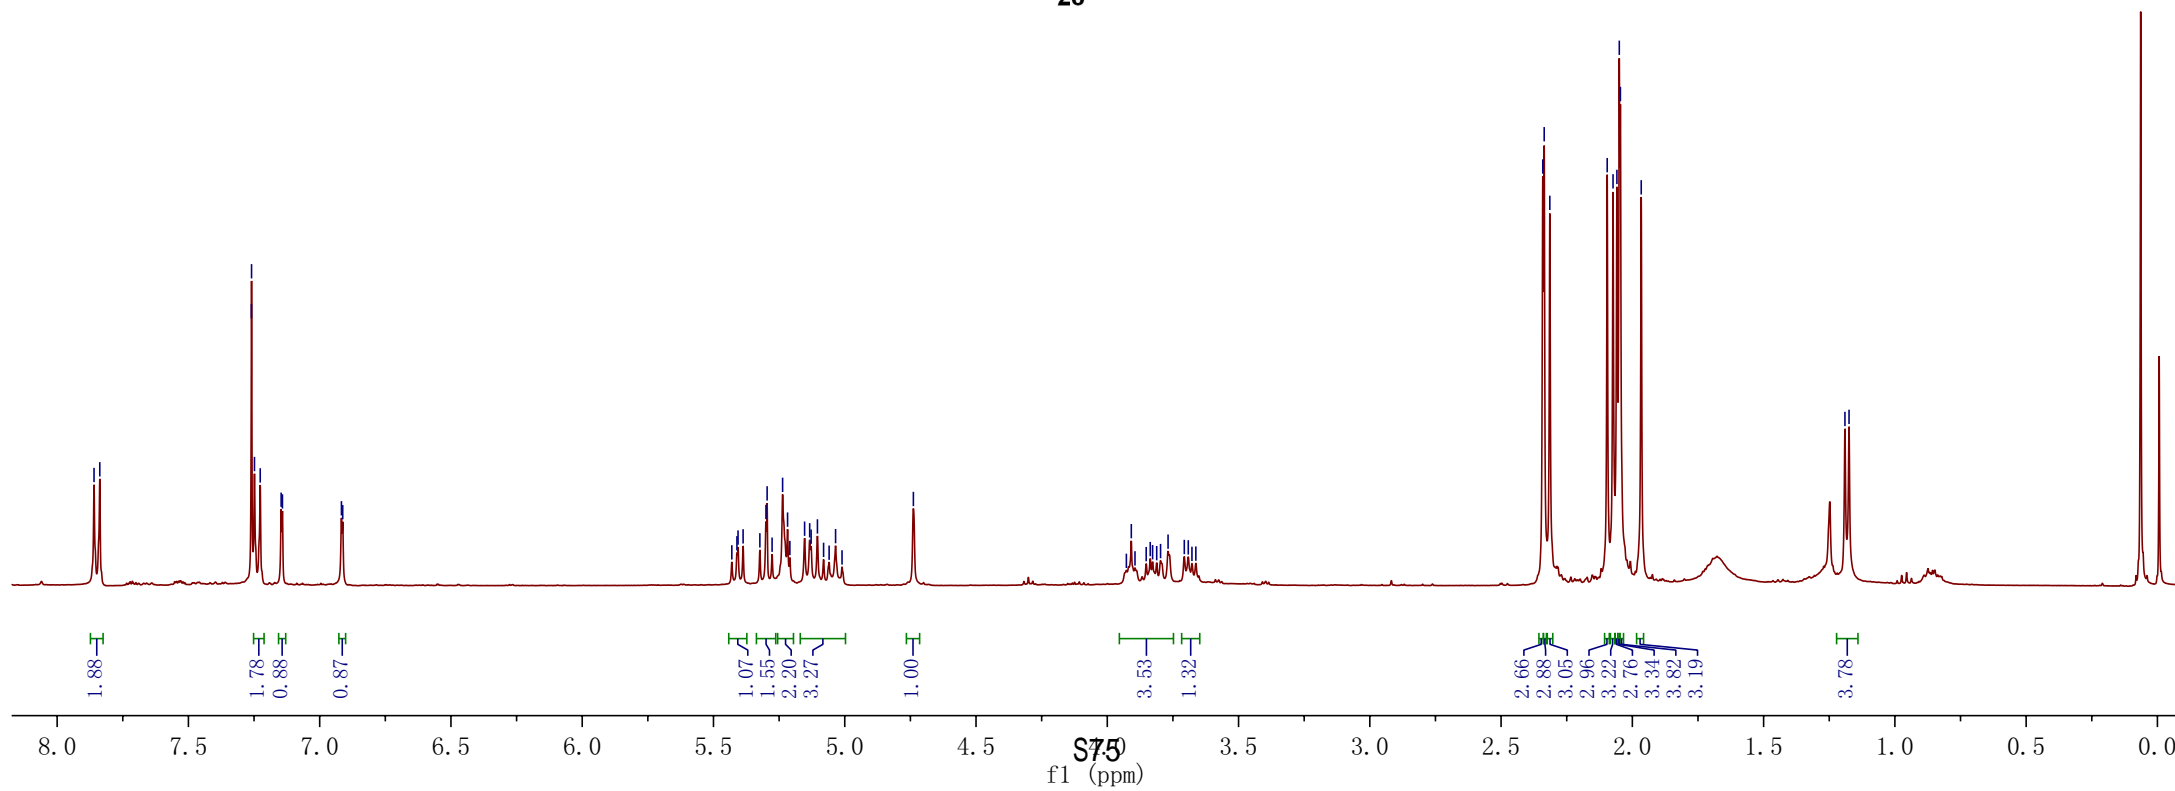

170.2637  
170.0036  
169.8345  
169.7691  
169.4763  
169.4429  
168.8962  
168.2325  
167.9440  
157.4133  
157.1568  
154.4380  
153.3398  
152.7127

134.2758  
129.5007  
127.1118  
121.9704  
113.2724  
107.7585  
106.2225  
100.4884  
97.9941

77.3174  
77.2037  
77.0002  
77.0000  
76.6824  
73.4939  
72.4113  
70.8443  
70.5144  
69.3304  
69.0990  
69.0528  
66.6443

21.1402  
20.8007  
20.6922  
20.6370  
20.5676  
17.2983

| Parameter              | Value  |
|------------------------|--------|
| Solvent                | CDC13  |
| Experiment             | 1D     |
| Spectrometer Frequency | 100.61 |
| Nucleus                | 13C    |

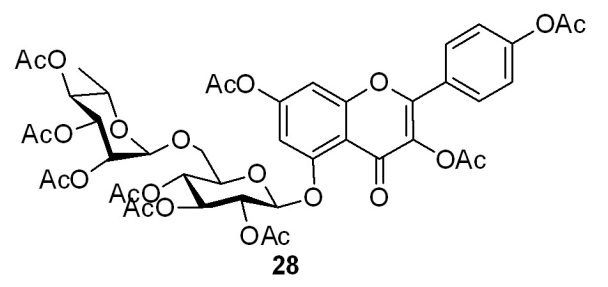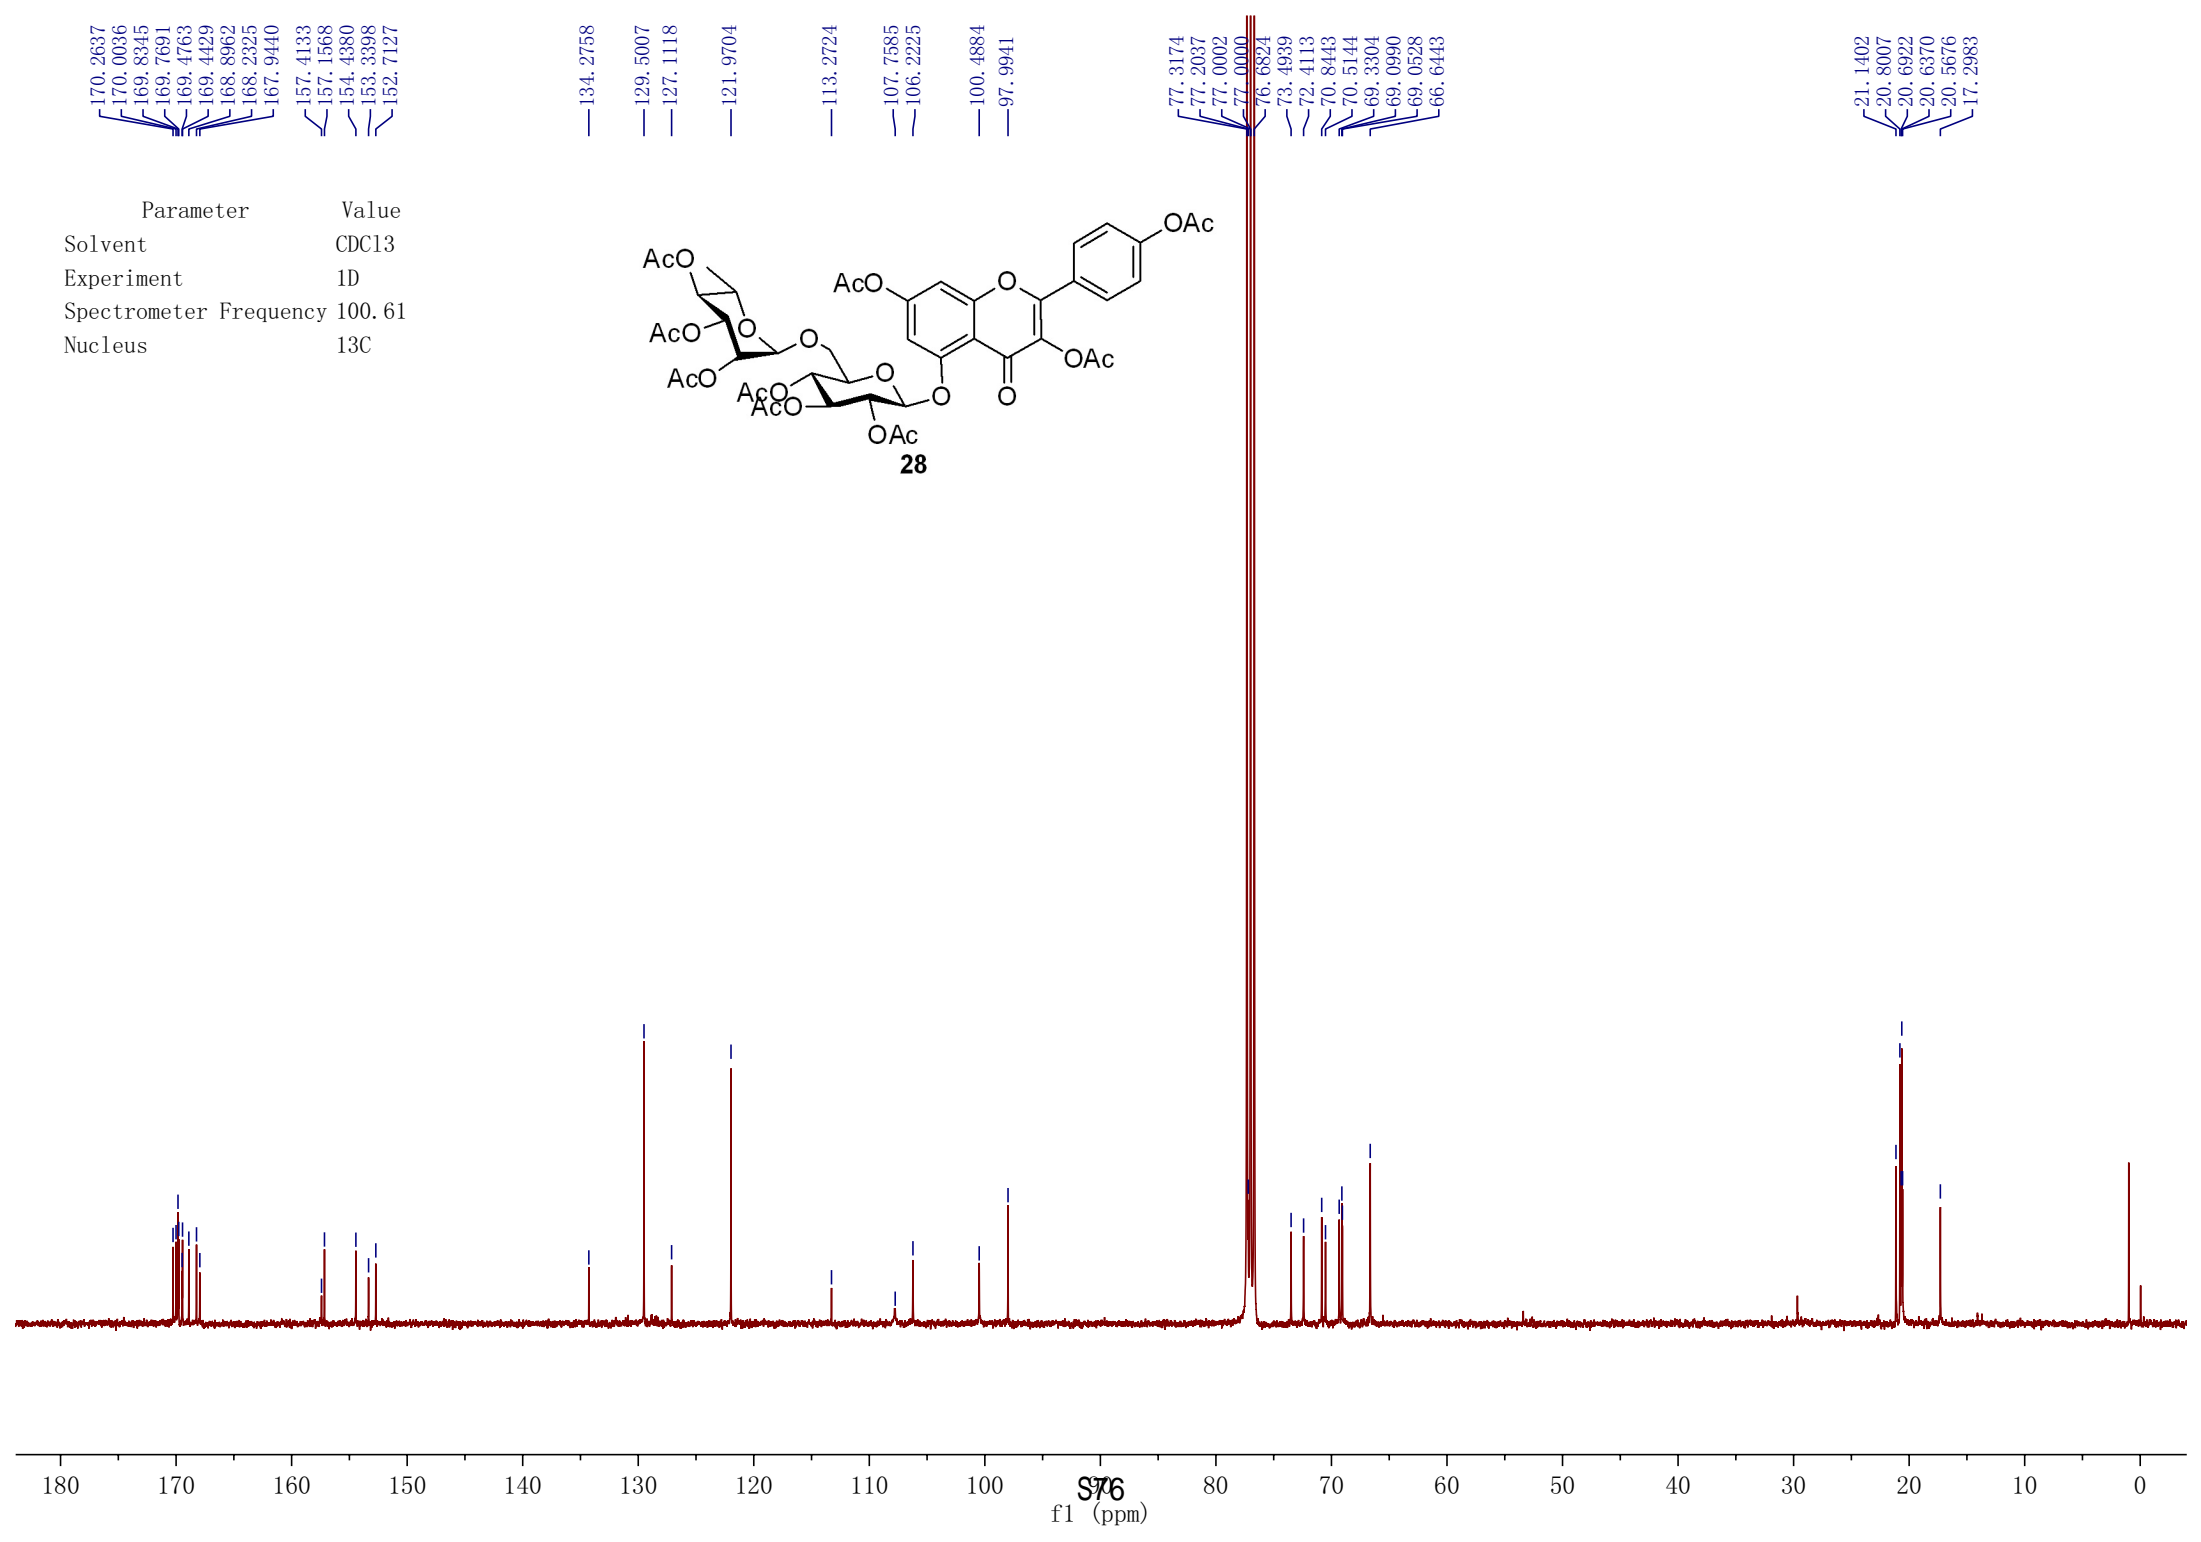

976  
f1 (ppm)

—129.5010  
—121.9733  
—106.2254  
—100.4856  
—97.9785

73.4779  
72.3964  
70.8218  
70.4837  
69.3104  
69.0852

21.1489  
20.8077  
20.6947  
20.6433  
20.5736  
17.2940

—0.9915

| Parameter              | Value           |
|------------------------|-----------------|
| Solvent                | CDC13           |
| Experiment             | 1D-DEPT-135     |
| Spectrometer Frequency | 100.61          |
| Nucleus                | <sup>13</sup> C |

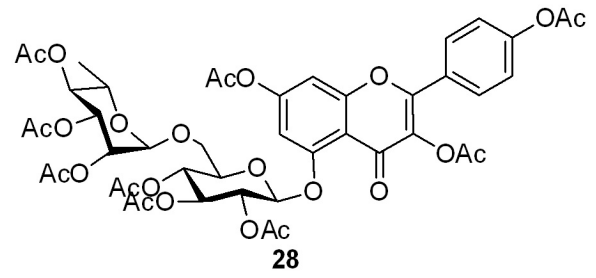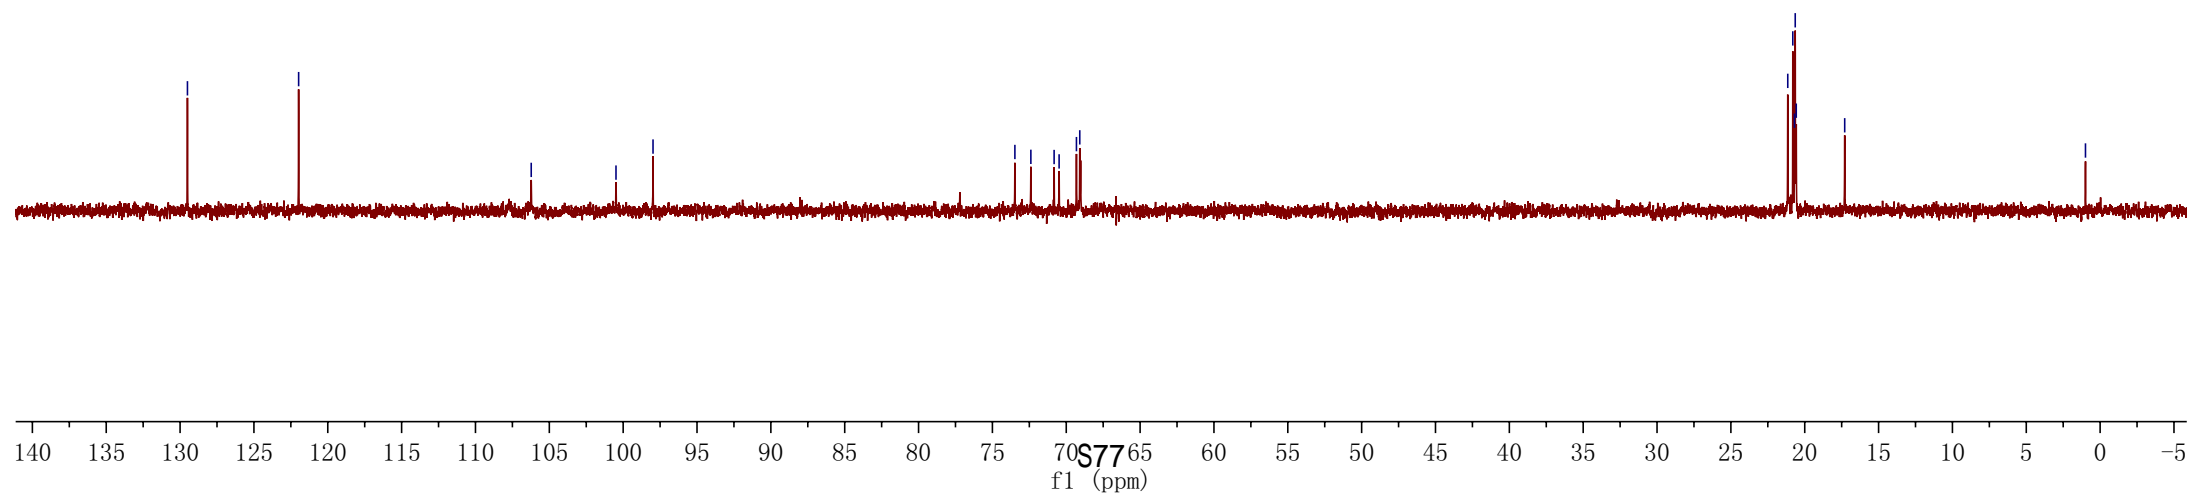

| Parameter                | Value (f2, f1)   |
|--------------------------|------------------|
| 1 Solvent                | CDC13            |
| 2 Experiment             | 2D-COSY          |
| 3 Spectrometer Frequency | (400.13, 400.13) |
| 4 Nucleus                | (1H, 1H)         |

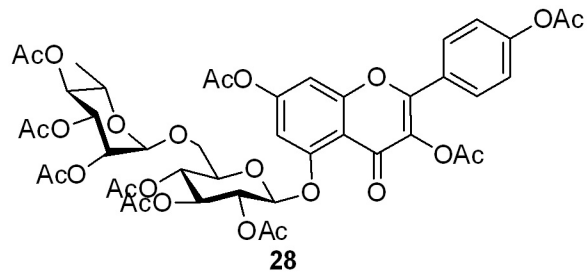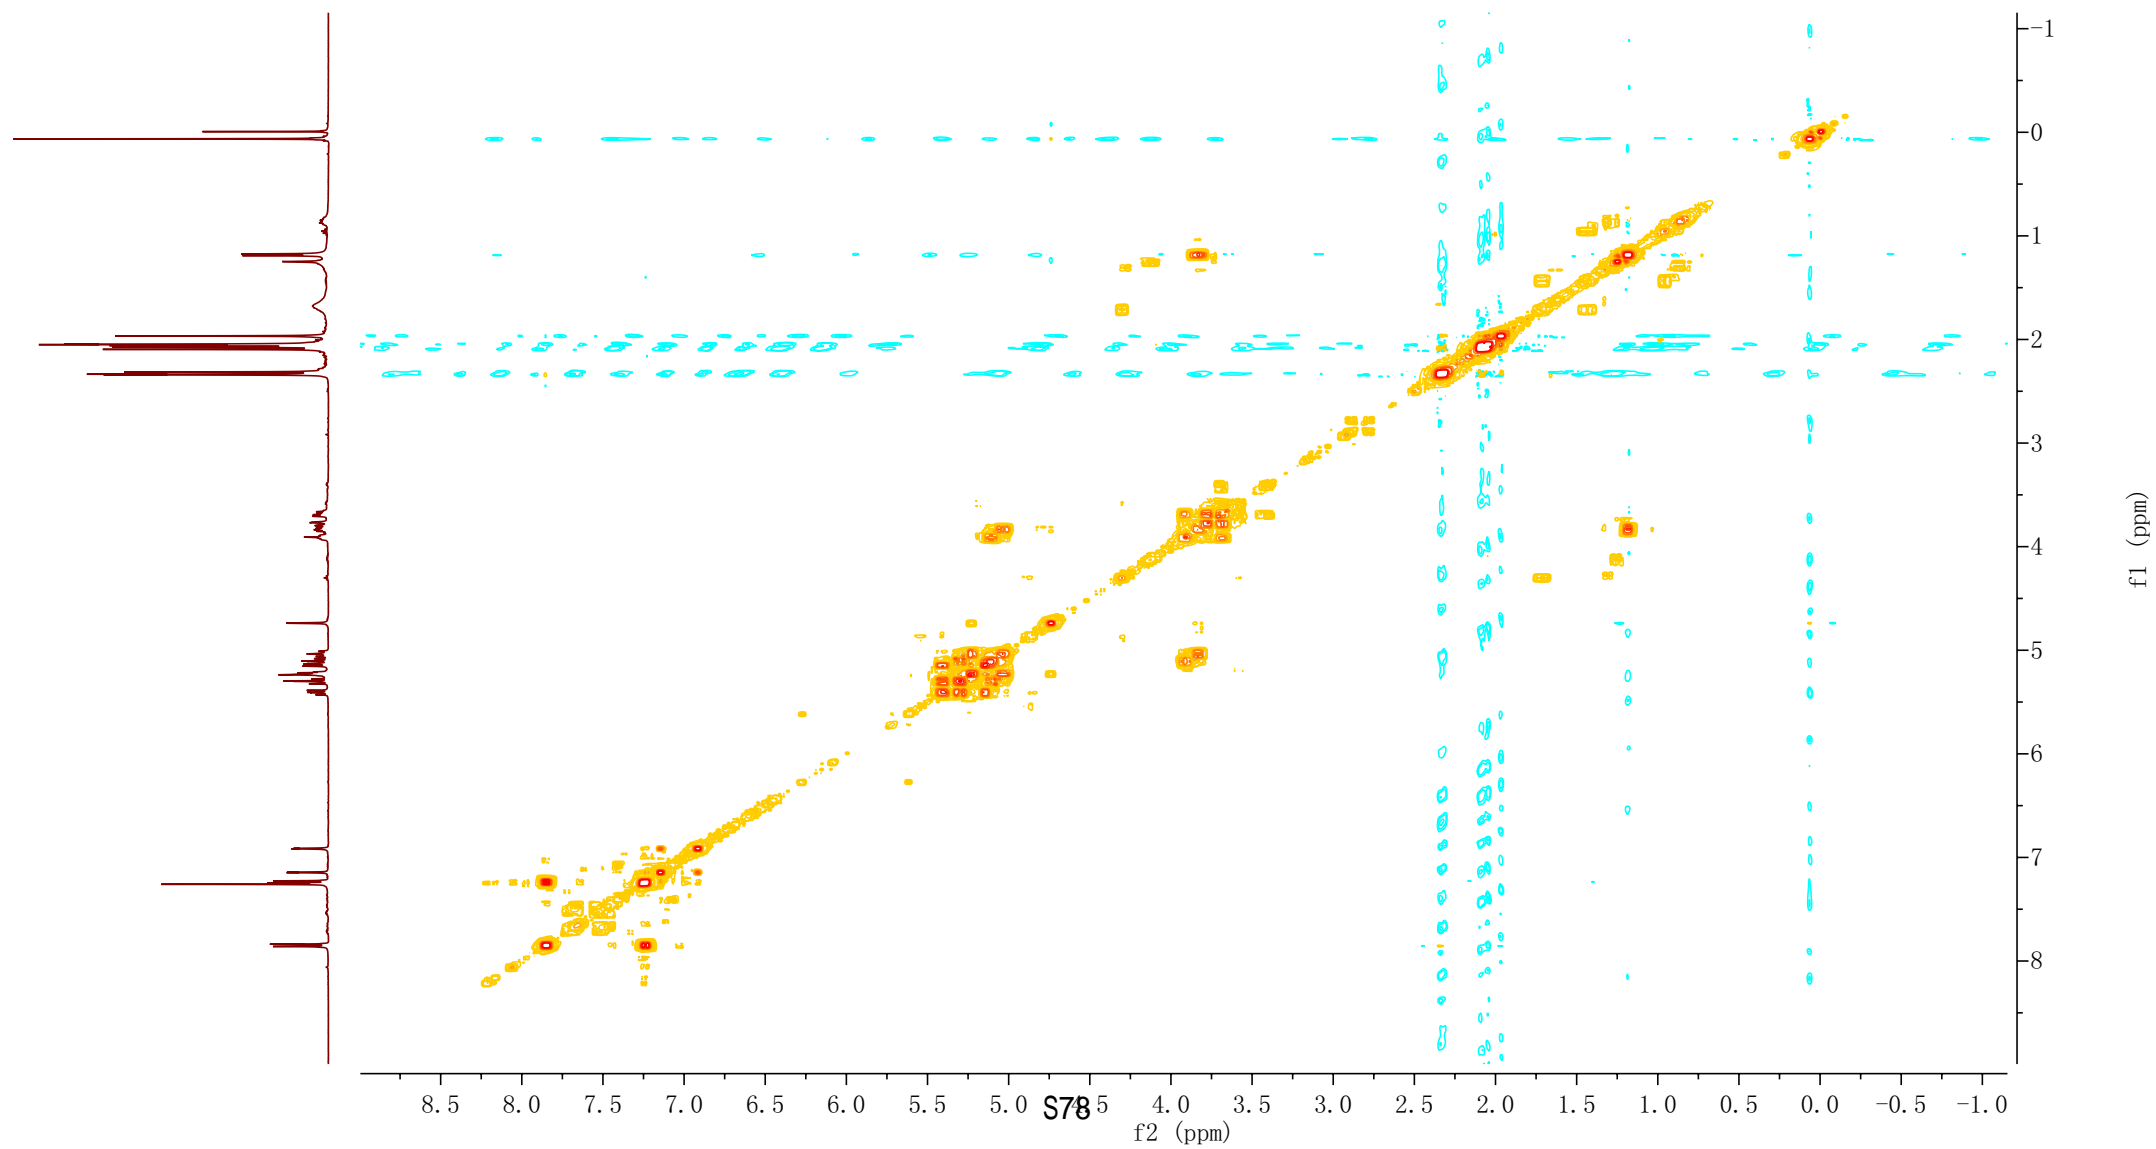

| Parameter                | Value (f2, f1)   |
|--------------------------|------------------|
| 1 Solvent                | CDC13            |
| 2 Experiment             | 2D-HSQC          |
| 3 Spectrometer Frequency | (400.13, 100.61) |
| 4 Nucleus                | (1H, 13C)        |

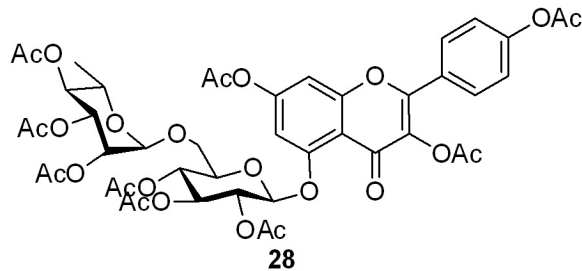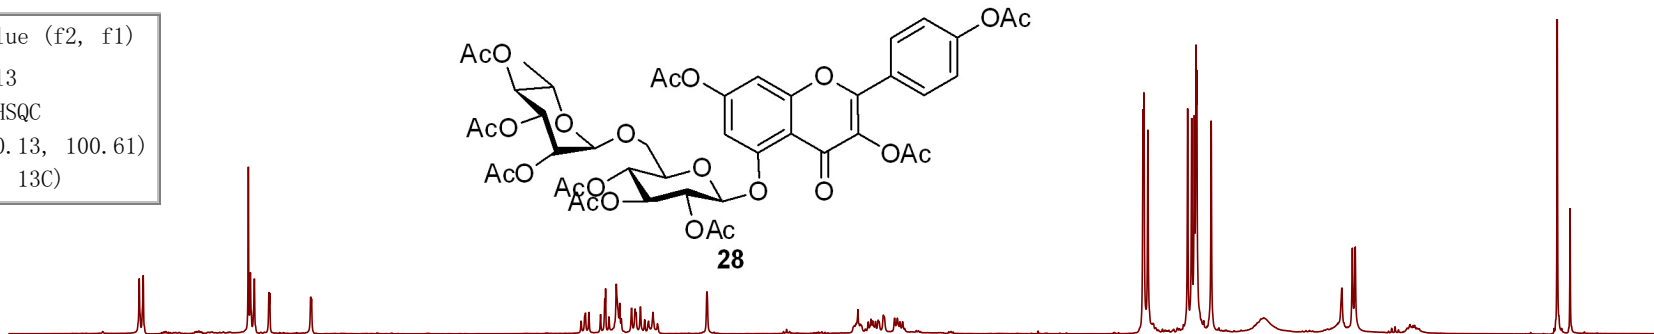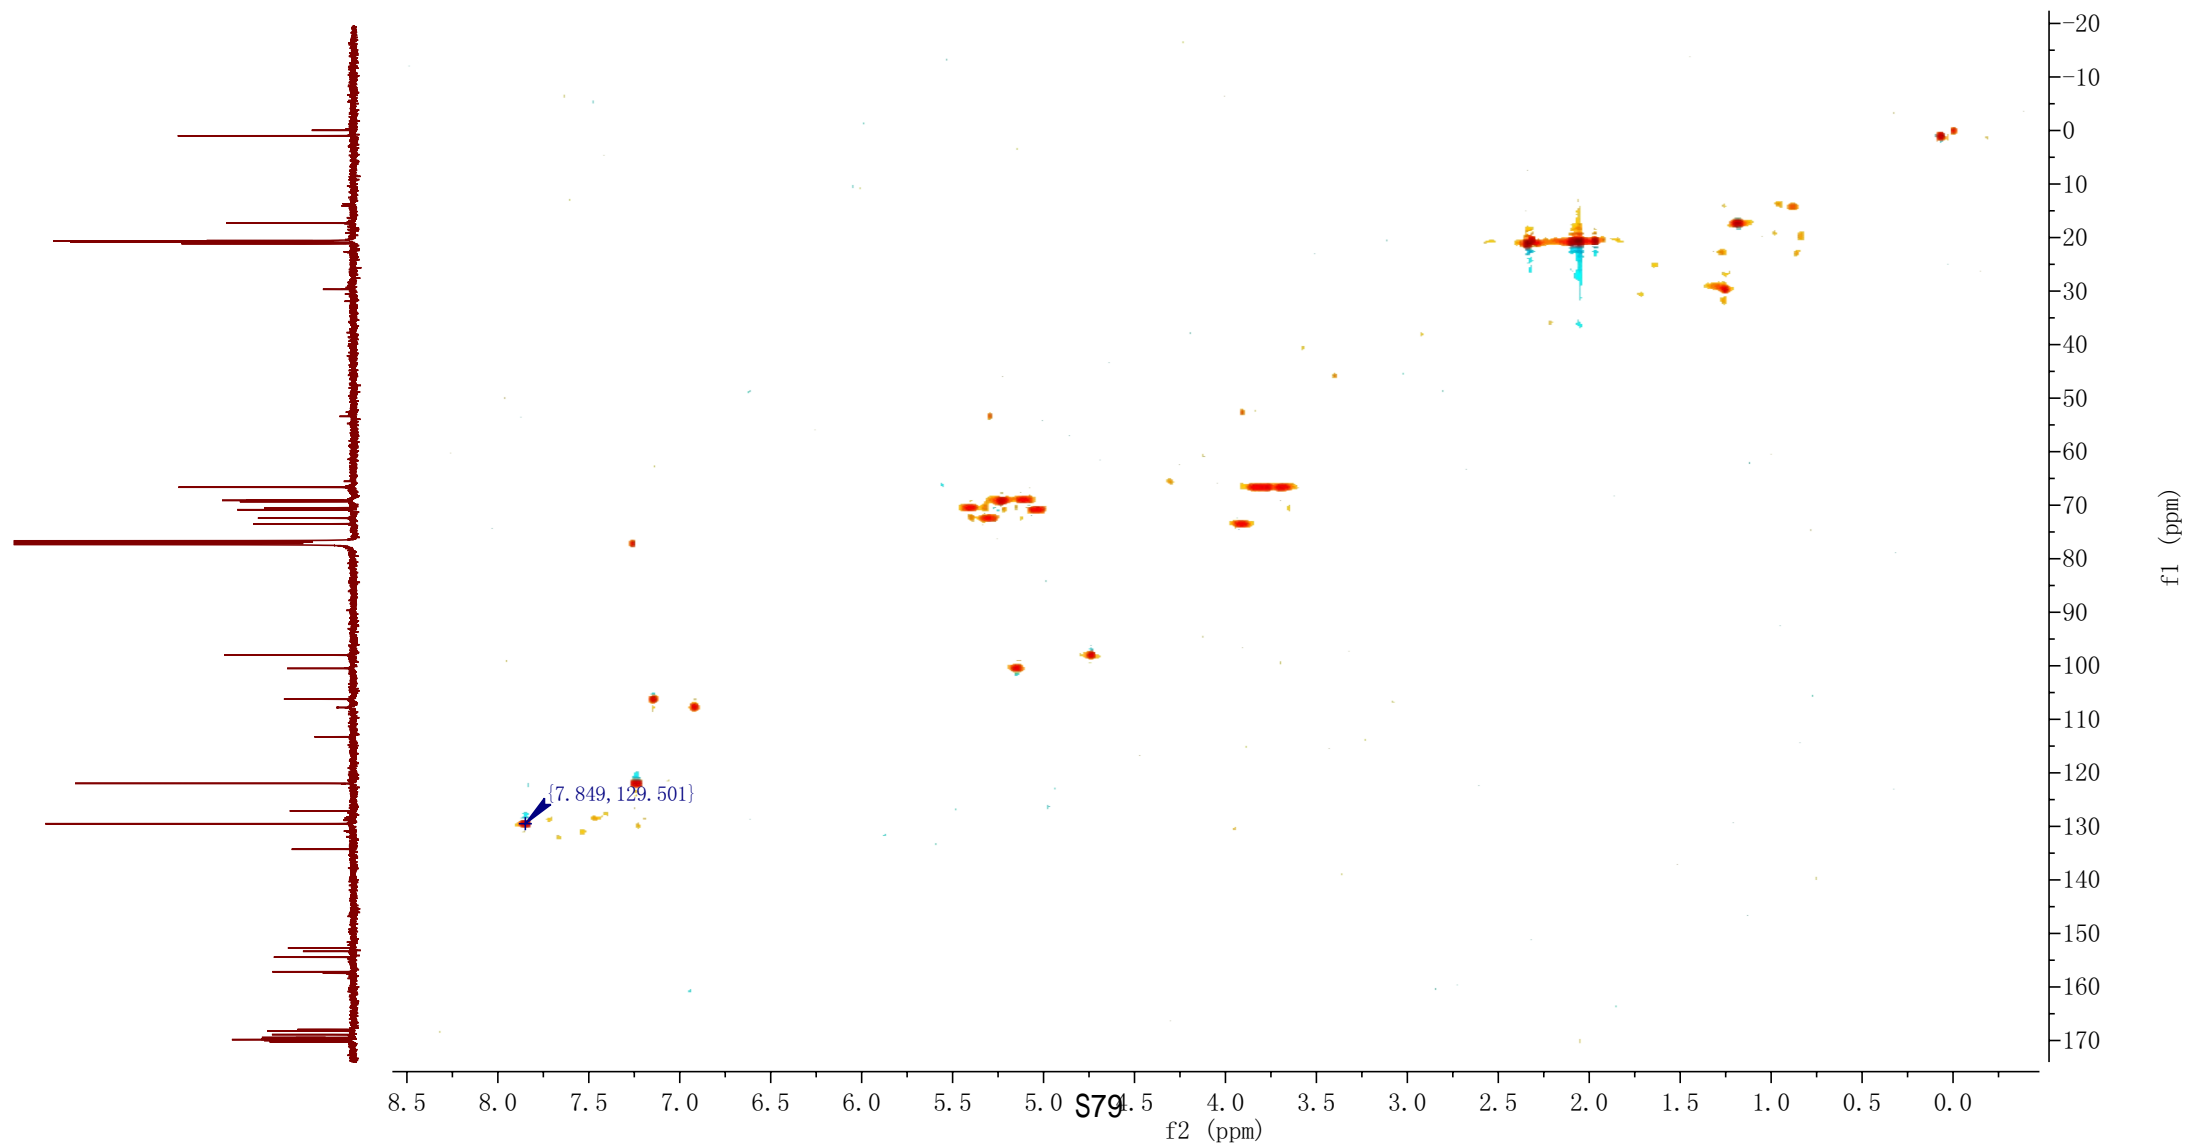

| Parameter                | Value (f2, f1)   |
|--------------------------|------------------|
| 1 Solvent                | CDC13            |
| 2 Experiment             | 2D-HMBC          |
| 3 Spectrometer Frequency | (400.13, 100.61) |
| 4 Nucleus                | (1H, 13C)        |

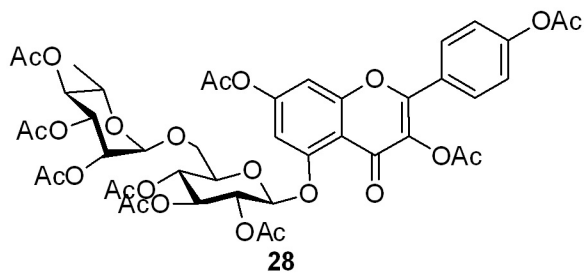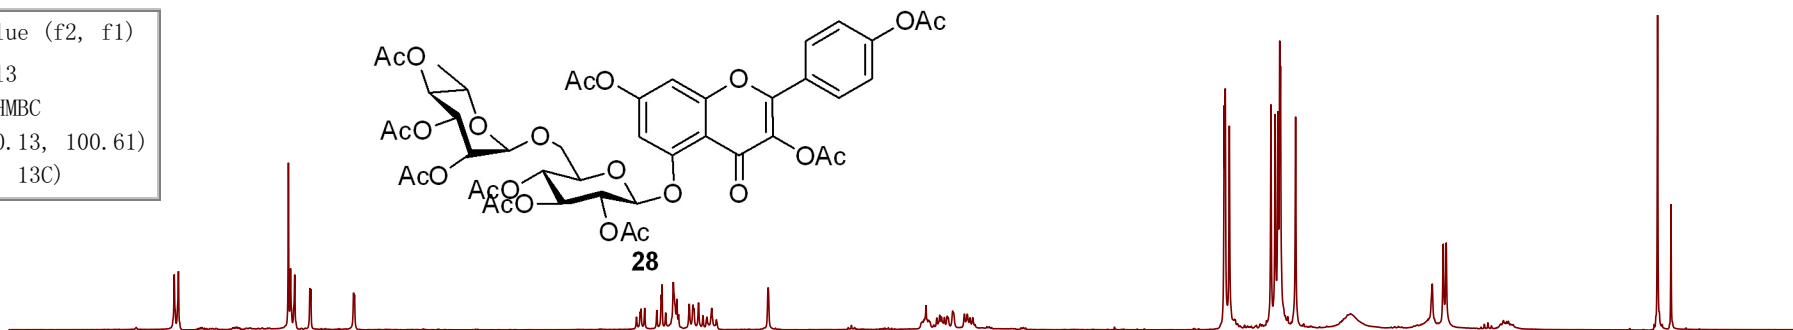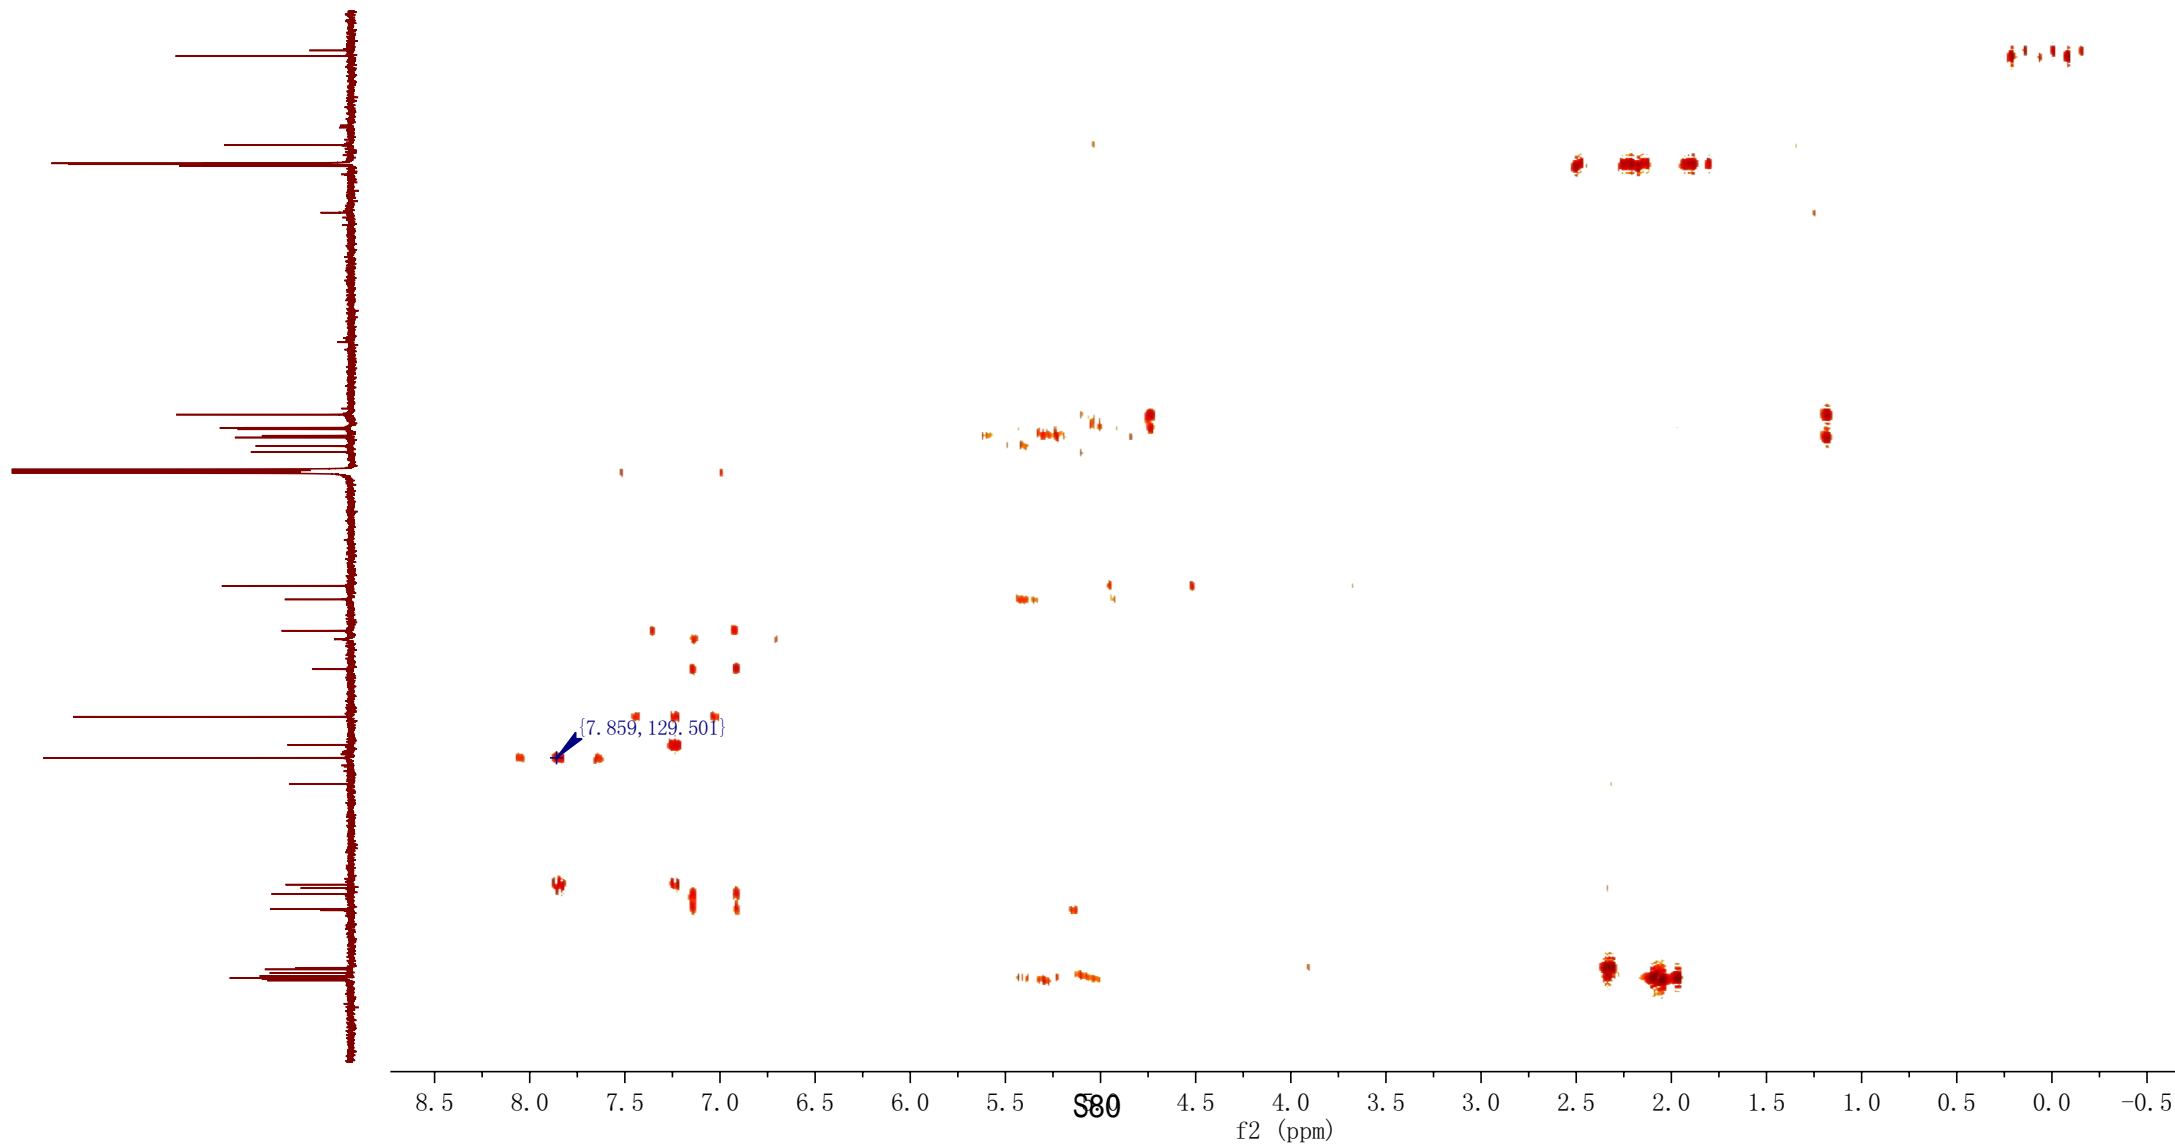



| Parameter                | Value (f2, f1)   |
|--------------------------|------------------|
| 1 Solvent                | CDC13            |
| 2 Experiment             | 2D-NOESY         |
| 3 Spectrometer Frequency | (400.13, 400.13) |
| 4 Nucleus                | (1H, 1H)         |

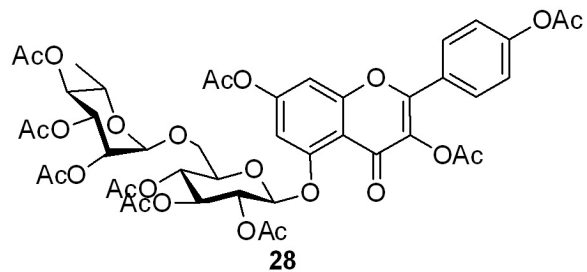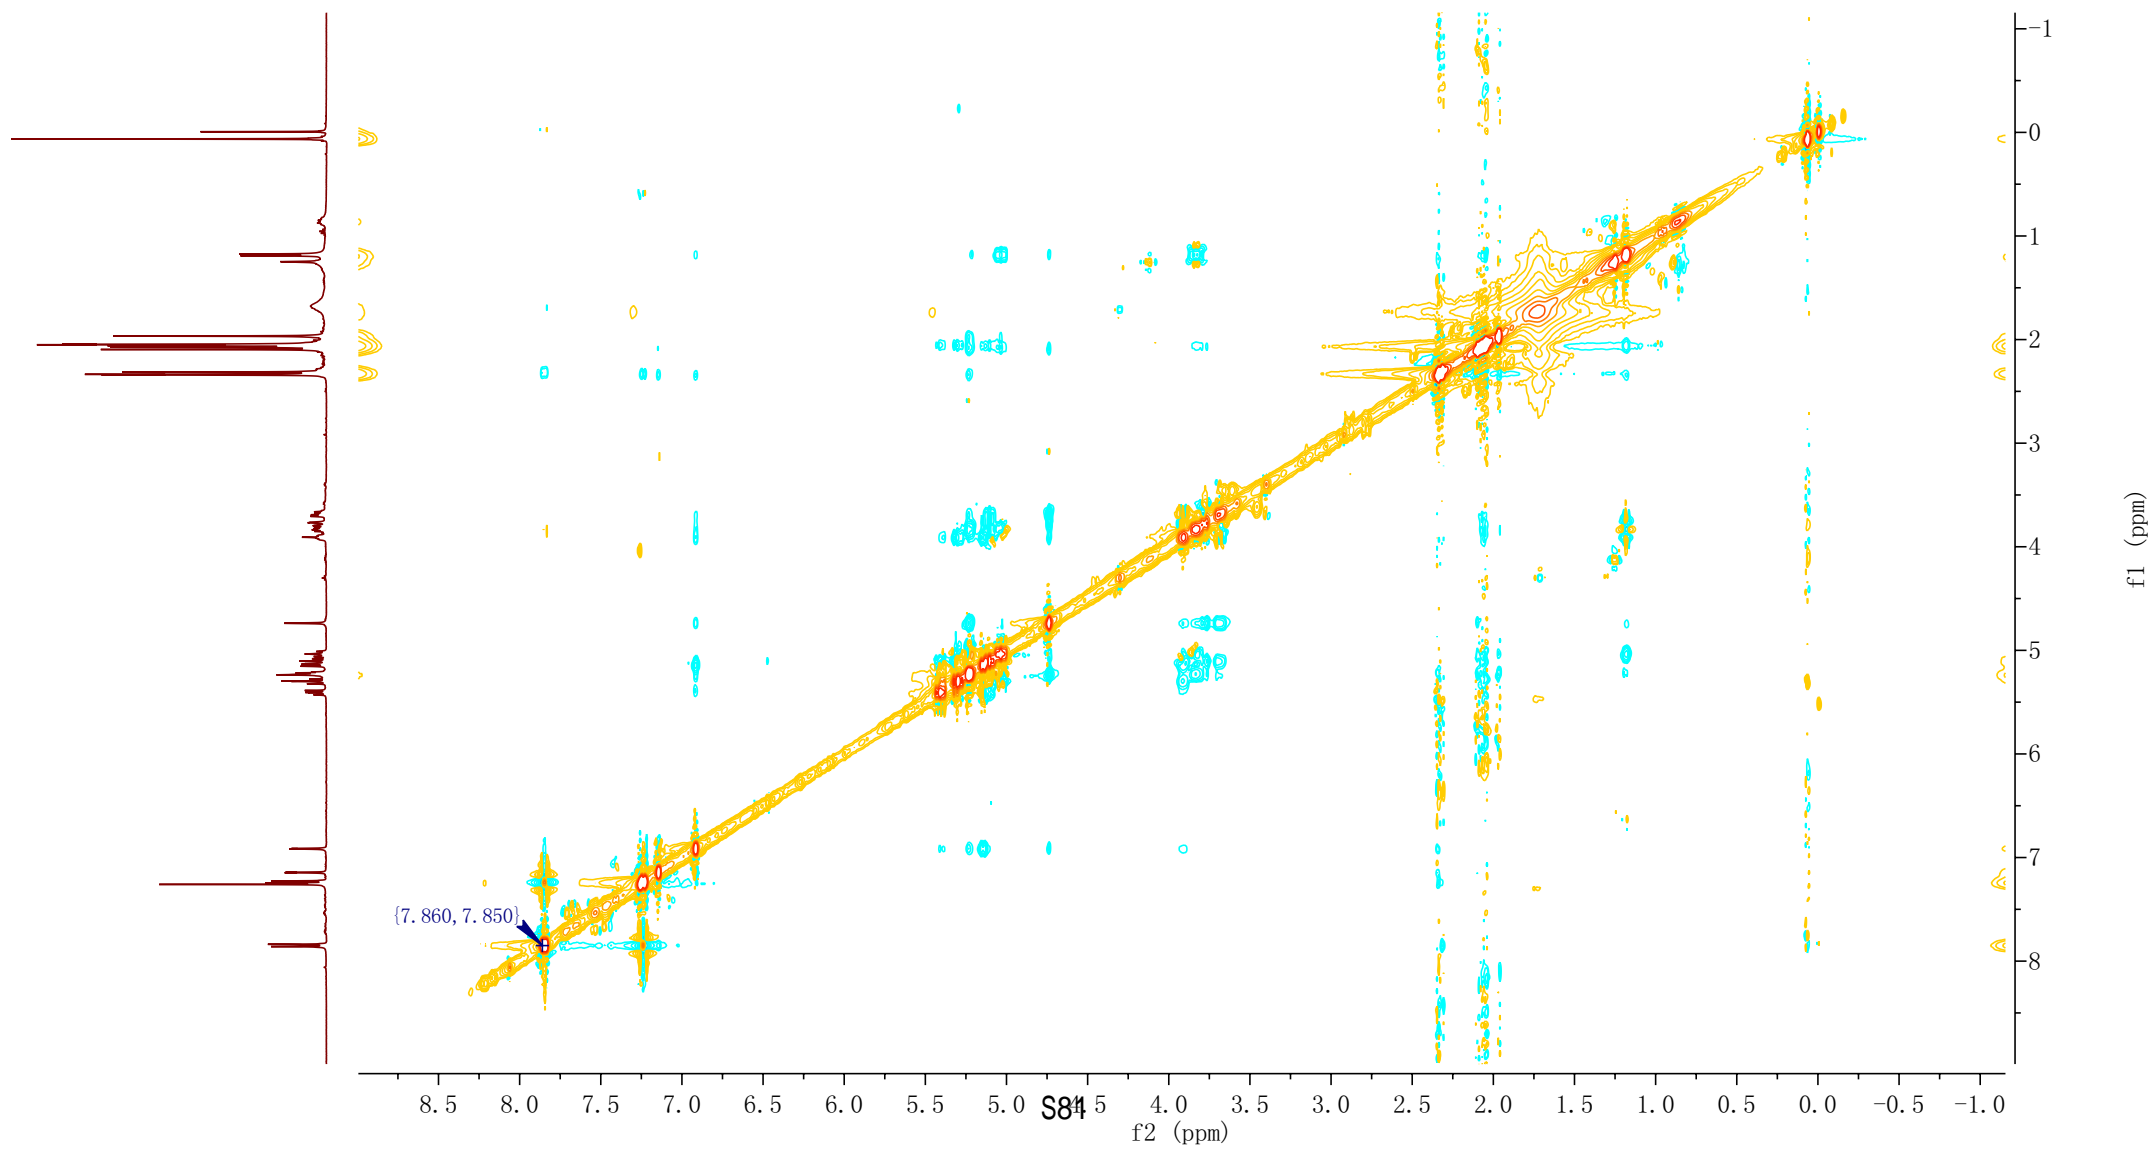

Supplement: c5ob02313k1.pdf [file c5ob02313k1.pdf]
